# Supplementary material for: Building an Immune-Related Genes Model to Predict Treatment, Extracellular Matrix, and Prognosis of Head and Neck Squamous Cell Carcinoma
Source: Hindawi journal article supplement (doi:10.1155/2023/6680731), 2023-07-11
Supplement: f2 [file 6680731.f2.pdf]

| ONTOLOGYID | Descriptor             | GeneRatio | BgRatio   | pvalue   | p.adjust | qvalue   | geneID     |
|------------|------------------------|-----------|-----------|----------|----------|----------|------------|
| BP         | GO:000269 regulation   | 153/905   | 470/18866 | 1.84E-86 | 9.93E-83 | 5.22E-83 | AZGP1/B2M  |
| BP         | GO:000246 adaptive in  | 131/905   | 370/18866 | 6.38E-79 | 1.73E-75 | 9.07E-76 | AZGP1/B2M  |
| BP         | GO:000244 lymphocyte   | 127/905   | 366/18866 | 3.14E-75 | 5.67E-72 | 2.98E-72 | AZGP1/B2M  |
| BP         | GO:000269 positive re  | 132/905   | 406/18866 | 3.45E-74 | 4.67E-71 | 2.45E-71 | CD4/FCER1  |
| BP         | GO:005086 positive re  | 133/905   | 421/18866 | 5.51E-73 | 5.96E-70 | 3.13E-70 | CD4/FCER1  |
| BP         | GO:000242 immune re    | 135/905   | 481/18866 | 7.13E-67 | 5.51E-64 | 2.89E-64 | CD4/FCER1  |
| BP         | GO:000275 immune re    | 135/905   | 481/18866 | 7.13E-67 | 5.51E-64 | 2.89E-64 | CD4/FCER1  |
| BP         | GO:000181 positive re  | 130/905   | 447/18866 | 2.13E-66 | 1.44E-63 | 7.56E-64 | B2M/CD4/   |
| BP         | GO:005125 positive re  | 116/905   | 357/18866 | 5.31E-65 | 3.19E-62 | 1.68E-62 | CD4/HLA-A  |
| BP         | GO:000690 phagocytosis | 119/905   | 382/18866 | 2.19E-64 | 1.19E-61 | 6.23E-62 | CALR/FCER  |
| BP         | GO:000283 regulation   | 121/905   | 409/18866 | 1.22E-62 | 5.98E-60 | 3.14E-60 | FCER1G/HL  |
| BP         | GO:006032 cell chemo   | 106/905   | 311/18866 | 1.02E-61 | 4.59E-59 | 2.41E-59 | CALR/FCER  |
| BP         | GO:000695 humoral in   | 115/905   | 377/18866 | 4.40E-61 | 1.83E-58 | 9.61E-59 | HLA-A/HLA  |
| BP         | GO:004211 T cell activ | 125/905   | 483/18866 | 2.19E-57 | 8.47E-55 | 4.45E-55 | B2M/CD1C   |
| BP         | GO:000223 response to  | 108/905   | 356/18866 | 4.70E-57 | 1.69E-54 | 8.90E-55 | B2M/ICAM   |
| BP         | GO:004274 defense re   | 106/905   | 348/18866 | 3.49E-56 | 1.18E-53 | 6.20E-54 | CD4/FCER1  |
| BP         | GO:003249 response to  | 103/905   | 334/18866 | 3.66E-55 | 1.11E-52 | 5.86E-53 | ICAM1/LTA  |
| BP         | GO:003134 positive re  | 110/905   | 385/18866 | 3.71E-55 | 1.11E-52 | 5.86E-53 | FCER1G/HL  |
| BP         | GO:003059 leukocyte c  | 85/905    | 232/18866 | 2.00E-52 | 5.70E-50 | 2.99E-50 | CALR/FCER  |
| BP         | GO:000961 response to  | 100/905   | 349/18866 | 3.07E-50 | 8.31E-48 | 4.37E-48 | IFNG/MICA  |
| BP         | GO:005085 antigen rec  | 95/905    | 325/18866 | 1.44E-48 | 3.70E-46 | 1.95E-46 | CD4/HLA-A  |
| BP         | GO:009752 myeloid lei  | 79/905    | 222/18866 | 1.23E-47 | 3.03E-45 | 1.59E-45 | FCER1G/CX  |
| BP         | GO:005160 defense re   | 84/905    | 258/18866 | 4.28E-47 | 1.01E-44 | 5.28E-45 | IFNG/MICA  |
| BP         | GO:003809 Fc receptor  | 81/905    | 241/18866 | 1.25E-46 | 2.81E-44 | 1.47E-44 | FCER1G/H   |
| BP         | GO:000715 leukocyte c  | 98/905    | 364/18866 | 1.49E-46 | 3.23E-44 | 1.70E-44 | CD4/HLA-A  |
| BP         | GO:002240 regulation   | 106/905   | 439/18866 | 1.89E-45 | 3.94E-43 | 2.07E-43 | CD4/HLA-A  |
| BP         | GO:001972 B cell medi  | 78/905    | 230/18866 | 2.99E-45 | 5.99E-43 | 3.15E-43 | FCER1G/HL  |
| BP         | GO:190303 regulation   | 92/905    | 329/18866 | 3.14E-45 | 6.06E-43 | 3.18E-43 | CD4/HLA-A  |
| BP         | GO:004578 positive re  | 104/905   | 428/18866 | 7.31E-45 | 1.36E-42 | 7.16E-43 | CALR/CD4/  |
| BP         | GO:005092 regulation   | 77/905    | 229/18866 | 2.28E-44 | 4.12E-42 | 2.16E-42 | CALR/CXCL  |
| BP         | GO:004508 regulation   | 88/905    | 307/18866 | 3.10E-44 | 5.41E-42 | 2.84E-42 | FCER1G/HL  |
| BP         | GO:001606 immunogl c   | 76/905    | 227/18866 | 1.21E-43 | 2.04E-41 | 1.07E-41 | FCER1G/HL  |
| BP         | GO:007066 leukocyte f  | 88/905    | 313/18866 | 1.75E-43 | 2.88E-41 | 1.51E-41 | CD4/HLA-A  |
| BP         | GO:007121 cellular res | 78/905    | 246/18866 | 8.28E-43 | 1.32E-40 | 6.92E-41 | HSPA5/ICA  |
| BP         | GO:003461 response to  | 88/905    | 320/18866 | 1.25E-42 | 1.93E-40 | 1.02E-40 | ICAM1/LTA  |
| BP         | GO:007135 cellular res | 84/905    | 297/18866 | 9.65E-42 | 1.45E-39 | 7.62E-40 | ICAM1/LTA  |
| BP         | GO:190370 regulation   | 108/905   | 498/18866 | 1.46E-41 | 2.13E-39 | 1.12E-39 | B2M/CD4/   |
| BP         | GO:000268 negative re  | 104/905   | 463/18866 | 1.72E-41 | 2.44E-39 | 1.28E-39 | FCER1G/HL  |
| BP         | GO:005086 regulation   | 88/905    | 332/18866 | 3.18E-41 | 4.41E-39 | 2.32E-39 | CD4/HLA-A  |
| BP         | GO:002240 positive re  | 81/905    | 279/18866 | 3.32E-41 | 4.48E-39 | 2.36E-39 | CD4/HLA-A  |
| BP         | GO:005072 regulation   | 99/905    | 425/18866 | 5.73E-41 | 7.56E-39 | 3.97E-39 | FCER1G/IFI |
| BP         | GO:004211 B cell activ | 87/905    | 328/18866 | 8.74E-41 | 1.13E-38 | 5.91E-39 | TGFB1/TFR  |
| BP         | GO:007122 cellular res | 70/905    | 208/18866 | 2.02E-40 | 2.54E-38 | 1.33E-38 | ICAM1/CXC  |
| BP         | GO:190303 positive re  | 74/905    | 235/18866 | 2.08E-40 | 2.55E-38 | 1.34E-38 | CD4/HLA-A  |
| BP         | GO:007121 cellular res | 72/905    | 222/18866 | 2.58E-40 | 3.11E-38 | 1.63E-38 | ICAM1/CXC  |
| BP         | GO:003809 Fc-gamma     | 59/905    | 142/18866 | 2.73E-40 | 3.21E-38 | 1.69E-38 | FCER1G/H   |
| BP         | GO:001821 peptidyl-ty  | 92/905    | 377/18866 | 7.41E-40 | 8.52E-38 | 4.48E-38 | CD4/ICAM:  |
| BP         | GO:007066 regulation   | 74/905    | 240/18866 | 1.07E-39 | 1.20E-37 | 6.32E-38 | CD4/HLA-A  |
| BP         | GO:000243 Fc receptor  | 59/905    | 145/18866 | 1.16E-39 | 1.28E-37 | 6.72E-38 | FCER1G/H   |

|    |           |                     |           |          |          |          |            |
|----|-----------|---------------------|-----------|----------|----------|----------|------------|
| BP | GO:003809 | Fc-epsilon 63/905   | 169/18866 | 1.52E-39 | 1.64E-37 | 8.61E-38 | FCER1G/PS  |
| BP | GO:001810 | peptidyl-ty 91/905  | 374/18866 | 2.58E-39 | 2.74E-37 | 1.44E-37 | CD4/ICAM:  |
| BP | GO:000283 | positive re 74/905  | 251/18866 | 3.34E-38 | 3.47E-36 | 1.82E-36 | FCER1G/HI  |
| BP | GO:000268 | regulation 68/905   | 212/18866 | 9.09E-38 | 9.27E-36 | 4.87E-36 | CALR/ICAM  |
| BP | GO:000245 | humoral in 59/905   | 155/18866 | 1.07E-37 | 1.07E-35 | 5.63E-36 | HLA-DQB1,  |
| BP | GO:007162 | granulocyti 54/905  | 127/18866 | 1.34E-37 | 1.32E-35 | 6.93E-36 | FCER1G/CX  |
| BP | GO:005092 | positive re 57/905  | 144/18866 | 1.47E-37 | 1.42E-35 | 7.46E-36 | CALR/CXCL  |
| BP | GO:000281 | regulation 61/905   | 168/18866 | 1.54E-37 | 1.46E-35 | 7.69E-36 | AZGP1/B2M  |
| BP | GO:000243 | immune re 56/905    | 139/18866 | 2.05E-37 | 1.88E-35 | 9.89E-36 | HSP90AA1,  |
| BP | GO:003809 | Fc-gamma 56/905     | 139/18866 | 2.05E-37 | 1.88E-35 | 9.89E-36 | HSP90AA1,  |
| BP | GO:004665 | lymphocyti 77/905   | 283/18866 | 5.30E-37 | 4.77E-35 | 2.51E-35 | CD4/HLA-A  |
| BP | GO:003294 | mononucl 77/905     | 286/18866 | 1.19E-36 | 1.06E-34 | 5.55E-35 | CD4/HLA-A  |
| BP | GO:005087 | positive re 67/905  | 214/18866 | 1.76E-36 | 1.54E-34 | 8.08E-35 | CD4/HLA-A  |
| BP | GO:009753 | granulocyti 57/905  | 150/18866 | 2.10E-36 | 1.80E-34 | 9.47E-35 | FCER1G/CX  |
| BP | GO:003434 | response tr 65/905  | 202/18866 | 3.11E-36 | 2.62E-34 | 1.38E-34 | B2M/HLA-/  |
| BP | GO:000695 | complemei 55/905    | 141/18866 | 7.12E-36 | 5.92E-34 | 3.11E-34 | IGHE/IGHG  |
| BP | GO:000695 | complemei 61/905    | 178/18866 | 7.47E-36 | 6.12E-34 | 3.22E-34 | IL1B/CD19, |
| BP | GO:003009 | lymphocyti 86/905   | 368/18866 | 9.74E-36 | 7.87E-34 | 4.13E-34 | B2M/CD4/   |
| BP | GO:003320 | tumor necr 60/905   | 173/18866 | 1.28E-35 | 1.01E-33 | 5.33E-34 | LTA/PSMB8  |
| BP | GO:005086 | regulation 63/905   | 195/18866 | 2.90E-35 | 2.28E-33 | 1.20E-33 | TGFB1/TFR  |
| BP | GO:007037 | ERK1 and E 80/905   | 325/18866 | 5.27E-35 | 4.07E-33 | 2.14E-33 | CD4/ICAM:  |
| BP | GO:000292 | regulation 53/905   | 134/18866 | 5.65E-35 | 4.31E-33 | 2.26E-33 | LTA/CXCL1  |
| BP | GO:005067 | regulation 66/905   | 219/18866 | 8.30E-35 | 6.24E-33 | 3.28E-33 | CD4/HLA-A  |
| BP | GO:007009 | chemokine 44/905    | 88/18866  | 1.17E-34 | 8.65E-33 | 4.54E-33 | CXCL8/CXC  |
| BP | GO:003294 | regulation 66/905   | 221/18866 | 1.55E-34 | 1.13E-32 | 5.93E-33 | CD4/HLA-A  |
| BP | GO:000244 | production 77/905   | 306/18866 | 1.99E-34 | 1.43E-32 | 7.54E-33 | B2M/FCER   |
| BP | GO:007037 | positive re 65/905  | 215/18866 | 2.19E-34 | 1.56E-32 | 8.20E-33 | CD4/ICAM:  |
| BP | GO:006033 | type I inter 45/905 | 95/18866  | 4.39E-34 | 3.05E-32 | 1.60E-32 | HLA-A/HLA  |
| BP | GO:007135 | cellular res 45/905 | 95/18866  | 4.39E-34 | 3.05E-32 | 1.60E-32 | HLA-A/HLA  |
| BP | GO:000282 | regulation 55/905   | 153/18866 | 1.12E-33 | 7.66E-32 | 4.03E-32 | AZGP1/B2M  |
| BP | GO:199086 | response tr 45/905  | 97/18866  | 1.41E-33 | 9.40E-32 | 4.94E-32 | CXCL8/CXC  |
| BP | GO:199086 | cellular res 45/905 | 97/18866  | 1.41E-33 | 9.40E-32 | 4.94E-32 | CXCL8/CXC  |
| BP | GO:007037 | regulation 76/905   | 306/18866 | 1.43E-33 | 9.43E-32 | 4.95E-32 | CD4/ICAM:  |
| BP | GO:000268 | positive re 53/905  | 142/18866 | 1.86E-33 | 1.21E-31 | 6.38E-32 | CALR/ICAM  |
| BP | GO:003434 | response tr 45/905  | 99/18866  | 4.35E-33 | 2.80E-31 | 1.47E-31 | HLA-A/HLA  |
| BP | GO:000270 | regulation 63/905   | 211/18866 | 5.30E-33 | 3.37E-31 | 1.77E-31 | AZGP1/B2M  |
| BP | GO:190210 | regulation 73/905   | 290/18866 | 1.09E-32 | 6.88E-31 | 3.62E-31 | CD4/HLA-B  |
| BP | GO:000181 | negative re 81/905  | 360/18866 | 1.94E-32 | 1.21E-30 | 6.34E-31 | HLA-F/HSP  |
| BP | GO:007134 | cellular res 58/905 | 182/18866 | 3.56E-32 | 2.19E-30 | 1.15E-30 | B2M/HLA-/  |
| BP | GO:003044 | regulation 47/905   | 115/18866 | 6.48E-32 | 3.89E-30 | 2.05E-30 | IL1B/CD19, |
| BP | GO:003260 | interferon- 47/905  | 115/18866 | 6.48E-32 | 3.89E-30 | 2.05E-30 | HLA-A/LTA  |
| BP | GO:005085 | B cell rece 50/905  | 135/18866 | 1.95E-31 | 1.16E-29 | 6.09E-30 | CD79A/BTF  |
| BP | GO:007055 | response tr 61/905  | 211/18866 | 4.15E-31 | 2.44E-29 | 1.28E-29 | ICAM1/PSM  |
| BP | GO:007167 | mononucl 43/905     | 97/18866  | 4.23E-31 | 2.46E-29 | 1.29E-29 | CXCL10/CX  |
| BP | GO:003059 | neutrophil 44/905   | 103/18866 | 6.01E-31 | 3.46E-29 | 1.82E-29 | FCER1G/CX  |
| BP | GO:003210 | negative re 87/905  | 433/18866 | 6.71E-31 | 3.82E-29 | 2.01E-29 | HLA-A/HLA  |
| BP | GO:005073 | regulation 67/905   | 263/18866 | 2.08E-30 | 1.17E-28 | 6.17E-29 | CD4/ICAM:  |
| BP | GO:000691 | phagocyto: 47/905   | 126/18866 | 8.80E-30 | 4.91E-28 | 2.58E-28 | FCER1G/F2  |
| BP | GO:000689 | receptor-r 74/905   | 328/18866 | 8.90E-30 | 4.91E-28 | 2.58E-28 | B2M/CALR   |
| BP | GO:000269 | positive re 61/905  | 223/18866 | 1.25E-29 | 6.84E-28 | 3.59E-28 | AZGP1/B2M  |

|    |           |                         |           |          |          |          |               |
|----|-----------|-------------------------|-----------|----------|----------|----------|---------------|
| BP | GO:199026 | neutrophil 46/905       | 122/18866 | 2.05E-29 | 1.10E-27 | 5.78E-28 | FCER1G/CXCL10 |
| BP | GO:004205 | T cell prolifer 57/905  | 195/18866 | 2.05E-29 | 1.10E-27 | 5.78E-28 | CD4/HLA-A     |
| BP | GO:000270 | regulation 51/905       | 154/18866 | 2.50E-29 | 1.33E-27 | 6.97E-28 | AZGP1/B2M     |
| BP | GO:000268 | regulation 46/905       | 124/18866 | 4.75E-29 | 2.49E-27 | 1.31E-27 | CALR/CXCL10   |
| BP | GO:004508 | positive regul 59/905   | 213/18866 | 5.18E-29 | 2.69E-27 | 1.41E-27 | FCER1G/HLA-A  |
| BP | GO:007066 | positive regul 50/905   | 150/18866 | 6.30E-29 | 3.24E-27 | 1.70E-27 | CD4/HLA-A     |
| BP | GO:000269 | positive regul 41/905   | 96/18866  | 6.48E-29 | 3.31E-27 | 1.74E-27 | CALR/CXCL10   |
| BP | GO:000724 | I-kappaB ki 68/905      | 286/18866 | 6.89E-29 | 3.48E-27 | 1.83E-27 | CD4/RELB/     |
| BP | GO:005077 | negative regul 51/905   | 159/18866 | 1.42E-28 | 7.04E-27 | 3.70E-27 | HLA-A/HLA-B   |
| BP | GO:005109 | positive regul 51/905   | 159/18866 | 1.42E-28 | 7.04E-27 | 3.70E-27 | ICAM1/S100A1  |
| BP | GO:004212 | regulation 52/905       | 167/18866 | 2.09E-28 | 1.03E-26 | 5.39E-27 | CD4/HLA-A     |
| BP | GO:009902 | plasma mem 47/905       | 135/18866 | 3.19E-28 | 1.55E-26 | 8.17E-27 | FCER1G/F2     |
| BP | GO:005189 | positive regul 53/905   | 178/18866 | 7.31E-28 | 3.53E-26 | 1.86E-26 | HSP90AA1,     |
| BP | GO:005087 | positive regul 49/905   | 151/18866 | 9.23E-28 | 4.42E-26 | 2.32E-26 | TGFB1/TFR1    |
| BP | GO:003264 | regulation 41/905       | 104/18866 | 2.99E-27 | 1.42E-25 | 7.44E-26 | HLA-A/LTA     |
| BP | GO:004349 | protein kinase 65/905   | 278/18866 | 3.30E-27 | 1.55E-25 | 8.17E-26 | HLA-G/HSP70   |
| BP | GO:009719 | extrinsic act 59/905    | 230/18866 | 4.57E-27 | 2.13E-25 | 1.12E-25 | PDIA3/ICAM1   |
| BP | GO:005067 | positive regul 46/905   | 136/18866 | 5.07E-27 | 2.35E-25 | 1.23E-25 | CD4/HLA-A     |
| BP | GO:001032 | membrane 47/905         | 143/18866 | 5.92E-27 | 2.71E-25 | 1.43E-25 | FCER1G/F2     |
| BP | GO:005507 | calcium ion 85/905      | 468/18866 | 6.04E-27 | 2.74E-25 | 1.44E-25 | CALR/CD4/     |
| BP | GO:003294 | positive regul 46/905   | 137/18866 | 7.30E-27 | 3.29E-25 | 1.73E-25 | CD4/HLA-A     |
| BP | GO:000222 | pattern recogn 55/905   | 201/18866 | 7.95E-27 | 3.55E-25 | 1.87E-25 | CTSB/CTSL,    |
| BP | GO:004312 | regulation 61/905       | 252/18866 | 1.82E-26 | 8.08E-25 | 4.24E-25 | CD4/S100A1    |
| BP | GO:000687 | cellular calcium 83/905 | 456/18866 | 2.15E-26 | 9.45E-25 | 4.97E-25 | CALR/CD4/     |
| BP | GO:007134 | cellular res 52/905     | 183/18866 | 2.79E-26 | 1.22E-24 | 6.40E-25 | ICAM1/PSM     |
| BP | GO:004340 | regulation 71/905       | 342/18866 | 2.97E-26 | 1.28E-24 | 6.75E-25 | TGFB1/IL1F1   |
| BP | GO:000245 | T cell medi 40/905      | 104/18866 | 3.97E-26 | 1.70E-24 | 8.96E-25 | AZGP1/B2M     |
| BP | GO:007250 | cellular div 86/905     | 492/18866 | 4.84E-26 | 2.06E-24 | 1.08E-24 | CALR/CD4/     |
| BP | GO:000691 | phagocytosis 37/905     | 88/18866  | 6.43E-26 | 2.72E-24 | 1.43E-24 | IGHE/IGHG     |
| BP | GO:000190 | cell killing 50/905     | 172/18866 | 8.13E-26 | 3.41E-24 | 1.79E-24 | AZGP1/B2M     |
| BP | GO:005109 | regulation 82/905       | 455/18866 | 8.79E-26 | 3.66E-24 | 1.92E-24 | ICAM1/PSM     |
| BP | GO:005073 | positive regul 53/905   | 195/18866 | 9.77E-26 | 4.03E-24 | 2.12E-24 | CD4/ICAM1     |
| BP | GO:000222 | toll-like recogn 47/905 | 152/18866 | 1.22E-25 | 5.01E-24 | 2.63E-24 | CTSB/CTSL,    |
| BP | GO:005085 | T cell receptor 54/905  | 206/18866 | 2.31E-25 | 9.41E-24 | 4.95E-24 | CD4/HLA-A     |
| BP | GO:003261 | interleukin 42/905      | 121/18866 | 2.73E-25 | 1.10E-23 | 5.79E-24 | MR1/IFNG,     |
| BP | GO:005067 | epithelial cell 81/905  | 453/18866 | 3.05E-25 | 1.22E-23 | 6.42E-24 | B2M/CXCL10    |
| BP | GO:000282 | positive regul 40/905   | 110/18866 | 4.92E-25 | 1.96E-23 | 1.03E-23 | AZGP1/B2M     |
| BP | GO:000236 | cytokine pr 39/905      | 104/18866 | 5.07E-25 | 2.00E-23 | 1.05E-23 | B2M/FCER1     |
| BP | GO:000720 | positive regul 67/905   | 322/18866 | 6.92E-25 | 2.71E-23 | 1.42E-23 | CD4/CXCL10    |
| BP | GO:003021 | T cell differ 59/905    | 253/18866 | 9.98E-25 | 3.88E-23 | 2.04E-23 | B2M/CD4/      |
| BP | GO:004340 | positive regul 60/905   | 264/18866 | 1.68E-24 | 6.51E-23 | 3.42E-23 | TGFB1/IL1F1   |
| BP | GO:005067 | regulation 74/905       | 395/18866 | 2.06E-24 | 7.89E-23 | 4.15E-23 | B2M/CXCL10    |
| BP | GO:000190 | leukocyte r 39/905      | 108/18866 | 2.61E-24 | 9.96E-23 | 5.23E-23 | AZGP1/B2M     |
| BP | GO:007099 | neuron death 70/905     | 360/18866 | 3.97E-24 | 1.50E-22 | 7.90E-23 | HLA-F/HSP70   |
| BP | GO:005109 | positive regul 60/905   | 270/18866 | 5.88E-24 | 2.21E-22 | 1.16E-22 | ICAM1/S100A1  |
| BP | GO:005189 | regulation 58/905       | 253/18866 | 6.36E-24 | 2.37E-22 | 1.25E-22 | HLA-G/HSP70   |
| BP | GO:005072 | positive regul 46/905   | 158/18866 | 7.06E-24 | 2.61E-22 | 1.37E-22 | FCER1G/IFI    |
| BP | GO:000270 | regulation 44/905       | 144/18866 | 7.63E-24 | 2.81E-22 | 1.48E-22 | B2M/FCER1     |
| BP | GO:000282 | positive regul 38/905   | 105/18866 | 9.29E-24 | 3.39E-22 | 1.78E-22 | AZGP1/B2M     |
| BP | GO:000254 | monocyte r 31/905       | 67/18866  | 1.79E-23 | 6.49E-22 | 3.41E-22 | CXCL10/CXCL12 |

|    |           |                        |        |           |          |          |          |             |
|----|-----------|------------------------|--------|-----------|----------|----------|----------|-------------|
| BP | GO:004210 | positive regulation of | 37/905 | 101/18866 | 2.20E-23 | 7.93E-22 | 4.17E-22 | CD4/HLA-A   |
| BP | GO:003005 | myeloid cell           | 76/905 | 431/18866 | 2.41E-23 | 8.63E-22 | 4.54E-22 | B2M/CD4/    |
| BP | GO:006075 | regulation of          | 50/905 | 196/18866 | 5.42E-23 | 1.93E-21 | 1.01E-21 | HSP90AB1,   |
| BP | GO:004259 | antigen presentation   | 33/905 | 80/18866  | 6.20E-23 | 2.18E-21 | 1.15E-21 | B2M/CALR,   |
| BP | GO:005148 | regulation of          | 68/905 | 357/18866 | 6.21E-23 | 2.18E-21 | 1.15E-21 | CD4/CXCL1   |
| BP | GO:003134 | regulation of          | 35/905 | 92/18866  | 7.82E-23 | 2.73E-21 | 1.43E-21 | AZGP1/B2M   |
| BP | GO:003267 | regulation of          | 45/905 | 159/18866 | 7.97E-23 | 2.76E-21 | 1.45E-21 | FCER1G/HLA- |
| BP | GO:000270 | positive regulation of | 42/905 | 138/18866 | 9.65E-23 | 3.32E-21 | 1.75E-21 | AZGP1/B2M   |
| BP | GO:000247 | antigen presentation   | 36/905 | 99/18866  | 1.17E-22 | 4.00E-21 | 2.10E-21 | AZGP1/B2M   |
| BP | GO:003261 | interleukin            | 37/905 | 106/18866 | 1.58E-22 | 5.36E-21 | 2.82E-21 | MR1/IFNG,   |
| BP | GO:003263 | interleukin            | 46/905 | 170/18866 | 2.09E-22 | 7.06E-21 | 3.71E-21 | FCER1G/HLA- |
| BP | GO:000257 | myeloid cell           | 51/905 | 210/18866 | 2.22E-22 | 7.47E-21 | 3.92E-21 | CD4/FCER1   |
| BP | GO:007048 | response to            | 71/905 | 396/18866 | 2.66E-22 | 8.88E-21 | 4.67E-21 | ICAM1/LTA   |
| BP | GO:000166 | response to            | 67/905 | 359/18866 | 4.26E-22 | 1.41E-20 | 7.43E-21 | ICAM1/LTA   |
| BP | GO:190121 | regulation of          | 63/905 | 321/18866 | 4.88E-22 | 1.61E-20 | 8.46E-21 | HLA-F/HSP   |
| BP | GO:003629 | response to            | 68/905 | 371/18866 | 5.92E-22 | 1.94E-20 | 1.02E-20 | ICAM1/LTA   |
| BP | GO:006033 | interferon-            | 34/905 | 91/18866  | 6.43E-22 | 2.09E-20 | 1.10E-20 | B2M/HLA-    |
| BP | GO:000195 | regulation of          | 47/905 | 183/18866 | 8.07E-22 | 2.61E-20 | 1.37E-20 | HSP90AB1,   |
| BP | GO:004852 | negative regulation of | 36/905 | 104/18866 | 8.19E-22 | 2.64E-20 | 1.39E-20 | SLPI/APOB   |
| BP | GO:001993 | second messenger       | 76/905 | 456/18866 | 8.51E-22 | 2.72E-20 | 1.43E-20 | CD4/CXCL8   |
| BP | GO:000269 | negative regulation of | 39/905 | 124/18866 | 8.66E-22 | 2.75E-20 | 1.45E-20 | HLA-A/HLA   |
| BP | GO:007190 | positive regulation of | 65/905 | 345/18866 | 1.07E-21 | 3.37E-20 | 1.77E-20 | HSP90AB1,   |
| BP | GO:000191 | regulation of          | 31/905 | 75/18866  | 1.18E-21 | 3.68E-20 | 1.93E-20 | AZGP1/B2M   |
| BP | GO:000247 | antigen presentation   | 31/905 | 75/18866  | 1.18E-21 | 3.68E-20 | 1.93E-20 | B2M/CALR,   |
| BP | GO:003247 | regulation of          | 39/905 | 125/18866 | 1.20E-21 | 3.73E-20 | 1.96E-20 | RELB/TLR2,  |
| BP | GO:005125 | negative regulation of | 43/905 | 154/18866 | 1.30E-21 | 4.02E-20 | 2.11E-20 | HLA-F/HLA   |
| BP | GO:005067 | positive regulation of | 50/905 | 211/18866 | 1.86E-21 | 5.70E-20 | 3.00E-20 | CXCL12/MI   |
| BP | GO:190355 | regulation of          | 37/905 | 113/18866 | 2.02E-21 | 6.16E-20 | 3.24E-20 | FCER1G/IFI  |
| BP | GO:000228 | lymphocyte             | 47/905 | 187/18866 | 2.16E-21 | 6.57E-20 | 3.45E-20 | CD1C/FCEF   |
| BP | GO:003260 | type I interferon      | 39/905 | 127/18866 | 2.29E-21 | 6.92E-20 | 3.64E-20 | RELB/TLR2,  |
| BP | GO:190370 | positive regulation of | 49/905 | 204/18866 | 2.51E-21 | 7.56E-20 | 3.97E-20 | CD4/HLA-C   |
| BP | GO:004312 | positive regulation of | 47/905 | 188/18866 | 2.75E-21 | 8.22E-20 | 4.32E-20 | CD4/S100B   |
| BP | GO:000271 | regulation of          | 32/905 | 83/18866  | 3.37E-21 | 1.00E-19 | 5.27E-20 | B2M/FCER    |
| BP | GO:004390 | regulation of          | 52/905 | 231/18866 | 3.49E-21 | 1.03E-19 | 5.42E-20 | CD4/SLPI/C  |
| BP | GO:004561 | regulation of          | 46/905 | 181/18866 | 3.54E-21 | 1.04E-19 | 5.46E-20 | HLA-G/IFN-  |
| BP | GO:003134 | negative regulation of | 56/905 | 269/18866 | 5.49E-21 | 1.61E-19 | 8.44E-20 | HLA-A/HLA   |
| BP | GO:001973 | antimicrobial          | 40/905 | 137/18866 | 5.60E-21 | 1.63E-19 | 8.55E-20 | HLA-A/CXC   |
| BP | GO:000269 | negative regulation of | 46/905 | 184/18866 | 7.35E-21 | 2.13E-19 | 1.12E-19 | HLA-F/HLA   |
| BP | GO:007267 | lymphocyte             | 37/905 | 117/18866 | 7.87E-21 | 2.26E-19 | 1.19E-19 | ICAM1/CXC   |
| BP | GO:003265 | regulation of          | 36/905 | 111/18866 | 1.02E-20 | 2.91E-19 | 1.53E-19 | IFNG/ORM    |
| BP | GO:000716 | negative regulation of | 59/905 | 301/18866 | 1.12E-20 | 3.17E-19 | 1.67E-19 | HLA-G/CXC   |
| BP | GO:200123 | regulation of          | 43/905 | 162/18866 | 1.13E-20 | 3.21E-19 | 1.69E-19 | PDIA3/ICAI  |
| BP | GO:190390 | negative regulation of | 32/905 | 86/18866  | 1.21E-20 | 3.42E-19 | 1.79E-19 | SLPI/APOB   |
| BP | GO:003214 | activation of          | 62/905 | 331/18866 | 1.31E-20 | 3.66E-19 | 1.92E-19 | IL1B/TNF/T  |
| BP | GO:200123 | regulation of          | 70/905 | 413/18866 | 1.43E-20 | 3.99E-19 | 2.10E-19 | PDIA3/ICAI  |
| BP | GO:007170 | tumor necrosis         | 37/905 | 119/18866 | 1.52E-20 | 4.21E-19 | 2.21E-19 | FCER1G/IFI  |
| BP | GO:000270 | positive regulation of | 35/905 | 106/18866 | 1.80E-20 | 4.98E-19 | 2.61E-19 | AZGP1/B2M   |
| BP | GO:001406 | positive regulation of | 32/905 | 88/18866  | 2.75E-20 | 7.51E-19 | 3.95E-19 | TNF/F2R/C   |
| BP | GO:003275 | positive regulation of | 32/905 | 88/18866  | 2.75E-20 | 7.51E-19 | 3.95E-19 | FCER1G/IFI  |
| BP | GO:005086 | negative regulation of | 48/905 | 207/18866 | 3.19E-20 | 8.66E-19 | 4.55E-19 | HLA-F/HLA   |

|    |           |               |        |           |          |          |          |            |
|----|-----------|---------------|--------|-----------|----------|----------|----------|------------|
| BP | GO:003265 | regulation    | 26/905 | 55/18866  | 3.37E-20 | 9.12E-19 | 4.79E-19 | HLA-B/HLA  |
| BP | GO:003268 | regulation    | 35/905 | 110/18866 | 7.13E-20 | 1.92E-18 | 1.01E-18 | FCER1G/TL  |
| BP | GO:005076 | regulation    | 33/905 | 97/18866  | 7.77E-20 | 2.08E-18 | 1.09E-18 | CALR/FCER  |
| BP | GO:000270 | regulation    | 29/905 | 73/18866  | 9.14E-20 | 2.43E-18 | 1.28E-18 | AZGP1/B2M  |
| BP | GO:200011 | regulation    | 51/905 | 239/18866 | 1.03E-19 | 2.73E-18 | 1.44E-18 | S100A9/S1  |
| BP | GO:003261 | interleukin   | 26/905 | 57/18866  | 1.06E-19 | 2.79E-18 | 1.46E-18 | HLA-B/HLA  |
| BP | GO:001988 | antigen prc   | 50/905 | 232/18866 | 1.51E-19 | 3.97E-18 | 2.09E-18 | AZGP1/B2M  |
| BP | GO:004331 | neutrophil    | 75/905 | 487/18866 | 1.90E-19 | 4.96E-18 | 2.61E-18 | B2M/CTSB,  |
| BP | GO:009769 | receptor si   | 43/905 | 174/18866 | 2.25E-19 | 5.84E-18 | 3.07E-18 | IFNG/IFNL1 |
| BP | GO:000228 | neutrophil    | 75/905 | 490/18866 | 2.73E-19 | 7.06E-18 | 3.71E-18 | B2M/CTSB,  |
| BP | GO:190210 | positive re   | 41/905 | 159/18866 | 2.89E-19 | 7.45E-18 | 3.91E-18 | CD4/HLA-G  |
| BP | GO:001905 | viral life cy | 61/905 | 341/18866 | 2.96E-19 | 7.58E-18 | 3.99E-18 | CD4/CTSB/  |
| BP | GO:003264 | tumor necr    | 35/905 | 116/18866 | 4.94E-19 | 1.26E-17 | 6.63E-18 | FCER1G/TL  |
| BP | GO:001972 | calcium-m     | 48/905 | 222/18866 | 7.10E-19 | 1.80E-17 | 9.47E-18 | CD4/CXCL8  |
| BP | GO:004507 | negative re   | 26/905 | 61/18866  | 8.76E-19 | 2.21E-17 | 1.16E-17 | SLPI/APOB  |
| BP | GO:190134 | regulation    | 70/905 | 444/18866 | 8.78E-19 | 2.21E-17 | 1.16E-17 | HLA-G/ERA  |
| BP | GO:000725 | receptor si   | 41/905 | 164/18866 | 9.89E-19 | 2.48E-17 | 1.30E-17 | IFNG/IFNL1 |
| BP | GO:190390 | regulation    | 40/905 | 157/18866 | 1.27E-18 | 3.15E-17 | 1.66E-17 | CD4/SLPI/C |
| BP | GO:190401 | positive re   | 49/905 | 235/18866 | 1.52E-18 | 3.77E-17 | 1.98E-17 | ERAP1/CXC  |
| BP | GO:001406 | regulation    | 36/905 | 127/18866 | 1.53E-18 | 3.77E-17 | 1.98E-17 | TNF/F2R/C  |
| BP | GO:005079 | regulation    | 47/905 | 217/18866 | 1.54E-18 | 3.77E-17 | 1.98E-17 | CD4/SLPI/C |
| BP | GO:005123 | maintenan     | 58/905 | 324/18866 | 2.22E-18 | 5.44E-17 | 2.86E-17 | CALR/CD4/  |
| BP | GO:003129 | lymphocyt     | 25/905 | 58/18866  | 2.95E-18 | 7.18E-17 | 3.77E-17 | SRC/CD40L  |
| BP | GO:004586 | positive re   | 62/905 | 370/18866 | 4.36E-18 | 1.06E-16 | 5.55E-17 | IFNG/PSM   |
| BP | GO:000166 | ameboidal     | 72/905 | 481/18866 | 5.18E-18 | 1.25E-16 | 6.57E-17 | CALR/IFNG  |
| BP | GO:004824 | lymphocyt     | 26/905 | 65/18866  | 6.00E-18 | 1.44E-16 | 7.58E-17 | CXCL14/CX  |
| BP | GO:003265 | regulation    | 31/905 | 97/18866  | 8.11E-18 | 1.94E-16 | 1.02E-16 | IFNG/ORM   |
| BP | GO:000252 | acute infla   | 33/905 | 111/18866 | 8.38E-18 | 2.00E-16 | 1.05E-16 | FCER1G/IC  |
| BP | GO:000193 | endothelia    | 44/905 | 199/18866 | 8.46E-18 | 2.01E-16 | 1.05E-16 | CXCL12/TN  |
| BP | GO:004860 | reproducti    | 68/905 | 443/18866 | 1.19E-17 | 2.82E-16 | 1.48E-16 | CTSB/HSPA  |
| BP | GO:000237 | immunogl      | 45/905 | 210/18866 | 1.29E-17 | 3.03E-16 | 1.59E-16 | HLA-DQB1,  |
| BP | GO:003134 | positive re   | 25/905 | 61/18866  | 1.29E-17 | 3.03E-16 | 1.59E-16 | AZGP1/B2M  |
| BP | GO:000193 | regulation    | 42/905 | 184/18866 | 1.38E-17 | 3.21E-16 | 1.69E-16 | CXCL12/TN  |
| BP | GO:003806 | NIK/NF-ka     | 42/905 | 184/18866 | 1.38E-17 | 3.21E-16 | 1.69E-16 | CALR/PSMI  |
| BP | GO:005091 | positive ch   | 26/905 | 67/18866  | 1.48E-17 | 3.41E-16 | 1.79E-16 | CXCL8/CXC  |
| BP | GO:000193 | positive re   | 33/905 | 113/18866 | 1.53E-17 | 3.52E-16 | 1.85E-16 | CXCL12/VE  |
| BP | GO:003125 | T cell cost   | 24/905 | 56/18866  | 1.65E-17 | 3.78E-16 | 1.98E-16 | SRC/CD40L  |
| BP | GO:004800 | antigen prc   | 43/905 | 194/18866 | 1.82E-17 | 4.16E-16 | 2.18E-16 | AZGP1/B2M  |
| BP | GO:006145 | reproducti    | 68/905 | 447/18866 | 1.93E-17 | 4.38E-16 | 2.30E-16 | CTSB/HSPA  |
| BP | GO:004576 | regulation    | 64/905 | 403/18866 | 2.00E-17 | 4.52E-16 | 2.38E-16 | HLA-G/ERA  |
| BP | GO:190489 | positive re   | 30/905 | 93/18866  | 2.05E-17 | 4.62E-16 | 2.43E-16 | IFNG/IFNL1 |
| BP | GO:004506 | regulation    | 31/905 | 100/18866 | 2.18E-17 | 4.89E-16 | 2.57E-16 | SLPI/CXCL8 |
| BP | GO:007188 | leukocyte     | 32/905 | 108/18866 | 2.95E-17 | 6.59E-16 | 3.46E-16 | CTSL/FCER  |
| BP | GO:001406 | phosphatic    | 38/905 | 154/18866 | 3.00E-17 | 6.67E-16 | 3.51E-16 | TNF/F2R/C  |
| BP | GO:004328 | regulation    | 45/905 | 215/18866 | 3.37E-17 | 7.46E-16 | 3.92E-16 | S100A9/S1  |
| BP | GO:003260 | chemokine     | 27/905 | 75/18866  | 3.39E-17 | 7.47E-16 | 3.93E-16 | S100A9/S1  |
| BP | GO:004563 | regulation    | 50/905 | 263/18866 | 3.97E-17 | 8.74E-16 | 4.59E-16 | B2M/CD4/   |
| BP | GO:004576 | positive re   | 44/905 | 208/18866 | 4.98E-17 | 1.09E-15 | 5.74E-16 | ERAP1/CXC  |
| BP | GO:003272 | positive re   | 25/905 | 65/18866  | 7.98E-17 | 1.74E-15 | 9.15E-16 | HLA-A/LTA, |
| BP | GO:005104 | positive re   | 57/905 | 340/18866 | 9.89E-17 | 2.15E-15 | 1.13E-15 | FCER1G/HI  |

|    |           |              |        |           |          |          |          |            |
|----|-----------|--------------|--------|-----------|----------|----------|----------|------------|
| BP | GO:190489 | regulation   | 37/905 | 151/18866 | 1.01E-16 | 2.18E-15 | 1.14E-15 | IFNG/IFNL1 |
| BP | GO:000283 | negative re  | 30/905 | 98/18866  | 1.06E-16 | 2.29E-15 | 1.20E-15 | HLA-A/HLA  |
| BP | GO:000221 | activation   | 36/905 | 144/18866 | 1.31E-16 | 2.82E-15 | 1.48E-15 | FCER1G/PS  |
| BP | GO:004877 | tissue rem   | 40/905 | 178/18866 | 1.47E-16 | 3.14E-15 | 1.65E-15 | TGFB1/NO   |
| BP | GO:200123 | negative re  | 46/905 | 233/18866 | 1.63E-16 | 3.46E-15 | 1.82E-15 | ICAM1/PSM  |
| BP | GO:005254 | regulation   | 68/905 | 466/18866 | 1.73E-16 | 3.67E-15 | 1.93E-15 | PSMB8/PSI  |
| BP | GO:004211 | macrophag    | 30/905 | 101/18866 | 2.70E-16 | 5.70E-15 | 2.99E-15 | IFNG/TLR2, |
| BP | GO:005076 | positive re  | 25/905 | 68/18866  | 2.82E-16 | 5.94E-15 | 3.12E-15 | CALR/FCER  |
| BP | GO:007167 | regulation   | 22/905 | 51/18866  | 3.10E-16 | 6.49E-15 | 3.41E-15 | CXCL10/CX  |
| BP | GO:002240 | negative re  | 41/905 | 191/18866 | 3.42E-16 | 7.13E-15 | 3.75E-15 | HLA-G/CXC  |
| BP | GO:001095 | positive re  | 42/905 | 201/18866 | 4.12E-16 | 8.56E-15 | 4.50E-15 | PSME2/PSI  |
| BP | GO:007259 | reactive ox  | 51/905 | 288/18866 | 4.19E-16 | 8.68E-15 | 4.56E-15 | HSP90AA1,  |
| BP | GO:000191 | positive re  | 22/905 | 52/18866  | 5.13E-16 | 1.06E-14 | 5.56E-15 | AZGP1/B2M  |
| BP | GO:004642 | regulation   | 35/905 | 142/18866 | 5.61E-16 | 1.15E-14 | 6.06E-15 | IFNG/IFNL1 |
| BP | GO:004249 | response tr  | 61/905 | 397/18866 | 5.73E-16 | 1.17E-14 | 6.17E-15 | B2M/CALR,  |
| BP | GO:001988 | antigen pr   | 40/905 | 185/18866 | 6.06E-16 | 1.24E-14 | 6.50E-15 | B2M/CALR,  |
| BP | GO:004642 | positive re  | 28/905 | 90/18866  | 6.99E-16 | 1.42E-14 | 7.47E-15 | IFNG/IFNL1 |
| BP | GO:001907 | viral genon  | 33/905 | 127/18866 | 7.14E-16 | 1.45E-14 | 7.60E-15 | SLPI/CXCL8 |
| BP | GO:190353 | positive re  | 53/905 | 313/18866 | 7.87E-16 | 1.59E-14 | 8.34E-15 | FCER1G/HL  |
| BP | GO:005254 | regulation   | 64/905 | 434/18866 | 8.29E-16 | 1.67E-14 | 8.76E-15 | PSMB8/PSI  |
| BP | GO:004854 | response tr  | 56/905 | 346/18866 | 9.20E-16 | 1.84E-14 | 9.68E-15 | CALR/ICAM  |
| BP | GO:000803 | cell recogn  | 44/905 | 226/18866 | 1.28E-15 | 2.55E-14 | 1.34E-14 | PAEP/CCR7  |
| BP | GO:001095 | positive re  | 39/905 | 181/18866 | 1.59E-15 | 3.16E-14 | 1.66E-14 | PSME2/PSI  |
| BP | GO:000270 | positive re  | 29/905 | 100/18866 | 1.72E-15 | 3.41E-14 | 1.79E-14 | B2M/FCER   |
| BP | GO:200010 | regulation   | 27/905 | 86/18866  | 1.79E-15 | 3.52E-14 | 1.85E-14 | FCER1G/CX  |
| BP | GO:004866 | regulation   | 38/905 | 173/18866 | 1.88E-15 | 3.71E-14 | 1.95E-14 | IFNG/MMF   |
| BP | GO:000191 | T cell medi  | 20/905 | 44/18866  | 2.00E-15 | 3.91E-14 | 2.05E-14 | AZGP1/B2M  |
| BP | GO:004205 | T-helper 1   | 20/905 | 44/18866  | 2.00E-15 | 3.91E-14 | 2.05E-14 | RELB/XCL1, |
| BP | GO:003109 | stress-activ | 51/905 | 300/18866 | 2.37E-15 | 4.61E-14 | 2.42E-14 | IL1B/TNF/T |
| BP | GO:000228 | T cell activ | 30/905 | 109/18866 | 2.72E-15 | 5.27E-14 | 2.77E-14 | CD1C/FCEF  |
| BP | GO:004865 | smooth ml    | 38/905 | 175/18866 | 2.81E-15 | 5.43E-14 | 2.85E-14 | IFNG/MMF   |
| BP | GO:000271 | positive re  | 21/905 | 50/18866  | 2.85E-15 | 5.49E-14 | 2.89E-14 | AZGP1/B2M  |
| BP | GO:190121 | negative re  | 42/905 | 212/18866 | 3.01E-15 | 5.77E-14 | 3.03E-14 | HLA-F/HSP  |
| BP | GO:000191 | regulation   | 18/905 | 35/18866  | 3.22E-15 | 6.12E-14 | 3.22E-14 | AZGP1/B2M  |
| BP | GO:003273 | positive re  | 18/905 | 35/18866  | 3.22E-15 | 6.12E-14 | 3.22E-14 | HLA-G/IFN  |
| BP | GO:003264 | regulation   | 24/905 | 68/18866  | 3.28E-15 | 6.23E-14 | 3.27E-14 | TLR2/IL1B/ |
| BP | GO:000150 | ossificatio  | 61/905 | 412/18866 | 3.34E-15 | 6.32E-14 | 3.32E-14 | PSMC2/TG   |
| BP | GO:004558 | regulation   | 35/905 | 150/18866 | 3.45E-15 | 6.51E-14 | 3.42E-14 | HLA-G/IFN  |
| BP | GO:004582 | negative re  | 23/905 | 62/18866  | 3.50E-15 | 6.58E-14 | 3.46E-14 | HLA-A/HLA  |
| BP | GO:004343 | response tr  | 64/905 | 447/18866 | 3.52E-15 | 6.58E-14 | 3.46E-14 | ICAM1/CXC  |
| BP | GO:200105 | positive re  | 35/905 | 151/18866 | 4.29E-15 | 8.00E-14 | 4.21E-14 | S100A9/S1  |
| BP | GO:000279 | regulation   | 58/905 | 381/18866 | 4.67E-15 | 8.68E-14 | 4.56E-14 | IFNG/S100. |
| BP | GO:000282 | regulation   | 16/905 | 27/18866  | 5.48E-15 | 1.01E-13 | 5.33E-14 | XCL1/IL1B/ |
| BP | GO:005140 | neuron ap    | 45/905 | 245/18866 | 5.80E-15 | 1.07E-13 | 5.62E-14 | HSPA5/HSF  |
| BP | GO:003287 | positive re  | 37/905 | 170/18866 | 6.05E-15 | 1.11E-13 | 5.84E-14 | IL1B/TNF/T |
| BP | GO:005140 | stress-activ | 49/905 | 286/18866 | 6.17E-15 | 1.13E-13 | 5.94E-14 | IL1B/TNF/T |
| BP | GO:003287 | regulation   | 44/905 | 237/18866 | 7.80E-15 | 1.42E-13 | 7.48E-14 | IL1B/TNF/T |
| BP | GO:190303 | negative re  | 33/905 | 137/18866 | 7.92E-15 | 1.44E-13 | 7.58E-14 | HLA-G/CXC  |
| BP | GO:004801 | vascular en  | 28/905 | 98/18866  | 8.07E-15 | 1.46E-13 | 7.69E-14 | HSP90AA1,  |
| BP | GO:015007 | neuroinfla   | 25/905 | 77/18866  | 8.19E-15 | 1.48E-13 | 7.79E-14 | IFNG/MMF   |

|    |           |               |        |           |          |          |          |            |
|----|-----------|---------------|--------|-----------|----------|----------|----------|------------|
| BP | GO:007030 | positive re   | 37/905 | 172/18866 | 8.97E-15 | 1.62E-13 | 8.49E-14 | IL1B/TNF/T |
| BP | GO:004663 | alpha-beta    | 34/905 | 146/18866 | 9.13E-15 | 1.64E-13 | 8.62E-14 | CTSL/HLA-I |
| BP | GO:003022 | macrophag     | 20/905 | 47/18866  | 9.67E-15 | 1.73E-13 | 9.10E-14 | CD4/IFNG/  |
| BP | GO:003010 | natural kill  | 26/905 | 85/18866  | 1.20E-14 | 2.15E-13 | 1.13E-13 | HLA-F/MIC  |
| BP | GO:003166 | lipopolysac   | 22/905 | 59/18866  | 1.23E-14 | 2.19E-13 | 1.15E-13 | TGFB1/TLR  |
| BP | GO:007030 | regulation    | 44/905 | 240/18866 | 1.25E-14 | 2.22E-13 | 1.17E-13 | IL1B/TNF/T |
| BP | GO:004801 | phosphatic    | 39/905 | 192/18866 | 1.26E-14 | 2.22E-13 | 1.17E-13 | TNF/F2R/C  |
| BP | GO:003264 | regulation    | 20/905 | 48/18866  | 1.58E-14 | 2.79E-13 | 1.47E-13 | RELB/TLR2, |
| BP | GO:000222 | natural kill  | 23/905 | 66/18866  | 1.70E-14 | 2.99E-13 | 1.57E-13 | HLA-A/HLA  |
| BP | GO:000275 | innate imm    | 30/905 | 117/18866 | 2.20E-14 | 3.84E-13 | 2.02E-13 | FCER1G/PS  |
| BP | GO:004886 | stem cell d   | 46/905 | 264/18866 | 2.22E-14 | 3.88E-13 | 2.04E-13 | PSMB8/PSI  |
| BP | GO:003300 | muscle cell   | 44/905 | 244/18866 | 2.32E-14 | 4.03E-13 | 2.12E-13 | IFNG/MMF   |
| BP | GO:000247 | antigen pre   | 37/905 | 177/18866 | 2.34E-14 | 4.05E-13 | 2.13E-13 | B2M/CALR,  |
| BP | GO:007267 | T cell migr   | 23/905 | 67/18866  | 2.48E-14 | 4.28E-13 | 2.25E-13 | ICAM1/CXC  |
| BP | GO:004801 | inositol lipi | 39/905 | 196/18866 | 2.56E-14 | 4.41E-13 | 2.32E-13 | TNF/F2R/C  |
| BP | GO:003052 | intracellular | 46/905 | 265/18866 | 2.57E-14 | 4.41E-13 | 2.32E-13 | CALR/DDX5  |
| BP | GO:005086 | negative re   | 30/905 | 118/18866 | 2.81E-14 | 4.81E-13 | 2.53E-13 | HLA-G/XCL  |
| BP | GO:000272 | positive re   | 21/905 | 55/18866  | 2.84E-14 | 4.84E-13 | 2.54E-13 | B2M/FCER   |
| BP | GO:009013 | tissue migr   | 56/905 | 374/18866 | 2.89E-14 | 4.91E-13 | 2.58E-13 | CALR/IFNG  |
| BP | GO:005165 | maintenan     | 41/905 | 216/18866 | 2.98E-14 | 5.05E-13 | 2.66E-13 | CALR/CD4/  |
| BP | GO:001063 | epithelial c  | 55/905 | 365/18866 | 3.76E-14 | 6.36E-13 | 3.34E-13 | CALR/IFNG  |
| BP | GO:007165 | protein loc   | 64/905 | 470/18866 | 3.89E-14 | 6.55E-13 | 3.44E-13 | IFNG/TGFB  |
| BP | GO:003260 | interferon-   | 20/905 | 50/18866  | 4.07E-14 | 6.84E-13 | 3.59E-13 | RELB/TLR2, |
| BP | GO:000726 | tyrosine ph   | 26/905 | 89/18866  | 4.10E-14 | 6.87E-13 | 3.61E-13 | IFNG/IFNL1 |
| BP | GO:004210 | B cell prolif | 27/905 | 97/18866  | 4.95E-14 | 8.26E-13 | 4.34E-13 | TFRC/CD4C  |
| BP | GO:200037 | regulation    | 39/905 | 200/18866 | 5.11E-14 | 8.50E-13 | 4.46E-13 | HSP90AA1,  |
| BP | GO:009013 | epithelium    | 55/905 | 368/18866 | 5.34E-14 | 8.86E-13 | 4.66E-13 | CALR/IFNG  |
| BP | GO:004562 | positive re   | 28/905 | 105/18866 | 5.53E-14 | 9.15E-13 | 4.81E-13 | HLA-G/IFN  |
| BP | GO:000930 | protein sec   | 63/905 | 462/18866 | 5.80E-14 | 9.56E-13 | 5.02E-13 | IFNG/TGFB  |
| BP | GO:000222 | stimulator    | 29/905 | 113/18866 | 5.82E-14 | 9.56E-13 | 5.02E-13 | FCER1G/PS  |
| BP | GO:007152 | semaphori     | 18/905 | 40/18866  | 6.40E-14 | 1.05E-12 | 5.51E-13 | SEMA3A/SI  |
| BP | GO:003559 | establishm    | 63/905 | 463/18866 | 6.42E-14 | 1.05E-12 | 5.51E-13 | IFNG/TGFB  |
| BP | GO:004327 | positive re   | 47/905 | 284/18866 | 8.47E-14 | 1.38E-12 | 7.25E-13 | CD4/HSPA:  |
| BP | GO:000276 | regulation    | 30/905 | 123/18866 | 9.29E-14 | 1.50E-12 | 7.91E-13 | CD4/IFNG/  |
| BP | GO:200123 | negative re   | 28/905 | 107/18866 | 9.29E-14 | 1.50E-12 | 7.91E-13 | ICAM1/IL1I |
| BP | GO:005068 | regulation    | 24/905 | 78/18866  | 1.09E-13 | 1.76E-12 | 9.26E-13 | MICB/MMI   |
| BP | GO:004255 | superoxide    | 17/905 | 36/18866  | 1.18E-13 | 1.90E-12 | 1.00E-12 | TGFB1/NO:  |
| BP | GO:000222 | innate imm    | 29/905 | 116/18866 | 1.21E-13 | 1.94E-12 | 1.02E-12 | FCER1G/PS  |
| BP | GO:000030 | response tr   | 42/905 | 235/18866 | 1.25E-13 | 1.99E-12 | 1.05E-12 | LCN2/MMF   |
| BP | GO:004250 | regulation    | 25/905 | 86/18866  | 1.44E-13 | 2.29E-12 | 1.21E-12 | IFNG/IFNL1 |
| BP | GO:003313 | positive re   | 28/905 | 109/18866 | 1.54E-13 | 2.45E-12 | 1.29E-12 | HSP90AA1,  |
| BP | GO:005212 | movement      | 35/905 | 169/18866 | 1.58E-13 | 2.51E-12 | 1.32E-12 | CD4/CTSB/  |
| BP | GO:005092 | negative re   | 22/905 | 66/18866  | 1.82E-13 | 2.88E-12 | 1.51E-12 | CXCL13/WI  |
| BP | GO:190122 | positive re   | 24/905 | 80/18866  | 2.04E-13 | 3.22E-12 | 1.69E-12 | CALR/TLR2  |
| BP | GO:006190 | glial cell ac | 21/905 | 60/18866  | 2.14E-13 | 3.37E-12 | 1.77E-12 | IFNG/TLR2, |
| BP | GO:001604 | cell growth   | 64/905 | 490/18866 | 2.72E-13 | 4.26E-12 | 2.24E-12 | HSP90AA1,  |
| BP | GO:003248 | positive re   | 23/905 | 74/18866  | 2.80E-13 | 4.37E-12 | 2.30E-12 | TLR2/DDX5  |
| BP | GO:190340 | reactive ox   | 30/905 | 128/18866 | 2.88E-13 | 4.48E-12 | 2.36E-12 | HSP90AA1,  |
| BP | GO:000191 | positive re   | 15/905 | 28/18866  | 3.05E-13 | 4.74E-12 | 2.49E-12 | AZGP1/B2I  |
| BP | GO:006201 | regulation    | 61/905 | 456/18866 | 3.49E-13 | 5.41E-12 | 2.84E-12 | IFNG/NFYA  |

|    |                        |        |           |          |          |          |            |
|----|------------------------|--------|-----------|----------|----------|----------|------------|
| BP | GO:005170 interaction  | 39/905 | 212/18866 | 3.63E-13 | 5.60E-12 | 2.94E-12 | CD4/CTSB/  |
| BP | GO:001988 antigen prc  | 14/905 | 24/18866  | 3.88E-13 | 5.97E-12 | 3.14E-12 | AZGP1/B2M  |
| BP | GO:004633 positive re  | 31/905 | 138/18866 | 3.93E-13 | 6.03E-12 | 3.17E-12 | IL1B/TNF/T |
| BP | GO:190210 negative re  | 27/905 | 105/18866 | 4.08E-13 | 6.25E-12 | 3.28E-12 | HLA-G/PGL  |
| BP | GO:004206 gliogenesis  | 48/905 | 307/18866 | 4.09E-13 | 6.26E-12 | 3.29E-12 | IFNG/LTA/S |
| BP | GO:004440 entry into l | 32/905 | 147/18866 | 4.12E-13 | 6.28E-12 | 3.30E-12 | CD4/CTSB/  |
| BP | GO:005070 regulation   | 52/905 | 352/18866 | 4.23E-13 | 6.40E-12 | 3.37E-12 | IFNG/TGFB  |
| BP | GO:000697 response to  | 61/905 | 458/18866 | 4.24E-13 | 6.40E-12 | 3.37E-12 | MICB/LCN2  |
| BP | GO:000725 JNK casc     | 39/905 | 213/18866 | 4.24E-13 | 6.40E-12 | 3.37E-12 | IL1B/TNF/T |
| BP | GO:004632 regulation   | 36/905 | 184/18866 | 4.34E-13 | 6.53E-12 | 3.43E-12 | IL1B/TNF/T |
| BP | GO:004814 regulation   | 24/905 | 83/18866  | 5.03E-13 | 7.56E-12 | 3.97E-12 | LTA/S100A  |
| BP | GO:200037 positive re  | 27/905 | 106/18866 | 5.23E-13 | 7.83E-12 | 4.11E-12 | HSP90AA1,  |
| BP | GO:000177 microglial c | 19/905 | 50/18866  | 5.35E-13 | 7.97E-12 | 4.19E-12 | IFNG/TLR2, |
| BP | GO:000226 leukocyte e  | 19/905 | 50/18866  | 5.35E-13 | 7.97E-12 | 4.19E-12 | IFNG/TLR2, |
| BP | GO:001810 peptidyl-se  | 48/905 | 310/18866 | 5.92E-13 | 8.79E-12 | 4.62E-12 | HSP90AA1,  |
| BP | GO:005072 negative re  | 37/905 | 196/18866 | 6.46E-13 | 9.54E-12 | 5.02E-12 | PGLYRP1/A  |
| BP | GO:003261 interleukin  | 21/905 | 63/18866  | 6.46E-13 | 9.54E-12 | 5.02E-12 | FCER1G/XC  |
| BP | GO:006220 regulation   | 26/905 | 99/18866  | 6.50E-13 | 9.58E-12 | 5.03E-12 | TLR2/LBP/I |
| BP | GO:004814 fibroblast p | 24/905 | 84/18866  | 6.73E-13 | 9.89E-12 | 5.20E-12 | LTA/S100A  |
| BP | GO:000248 antigen prc  | 12/905 | 17/18866  | 6.85E-13 | 1.00E-11 | 5.26E-12 | AZGP1/B2M  |
| BP | GO:001988 antigen prc  | 12/905 | 17/18866  | 6.85E-13 | 1.00E-11 | 5.26E-12 | AZGP1/B2M  |
| BP | GO:190355 negative re  | 20/905 | 57/18866  | 7.59E-13 | 1.10E-11 | 5.80E-12 | LBP/LTF/AI |
| BP | GO:002261 gland morp   | 29/905 | 124/18866 | 7.60E-13 | 1.10E-11 | 5.80E-12 | TGFB1/TNF  |
| BP | GO:004814 positive re  | 19/905 | 51/18866  | 8.14E-13 | 1.18E-11 | 6.21E-12 | S100A6/PN  |
| BP | GO:003264 regulation   | 14/905 | 25/18866  | 8.42E-13 | 1.22E-11 | 6.40E-12 | DDX58/IRF  |
| BP | GO:004311 receptor m   | 37/905 | 198/18866 | 8.92E-13 | 1.29E-11 | 6.76E-12 | FCER1G/IFI |
| BP | GO:005093 induction c  | 11/905 | 14/18866  | 9.30E-13 | 1.34E-11 | 7.03E-12 | CXCL8/CXC  |
| BP | GO:004328 positive re  | 30/905 | 134/18866 | 1.03E-12 | 1.48E-11 | 7.78E-12 | S100A9/S1  |
| BP | GO:001921 regulation   | 58/905 | 431/18866 | 1.05E-12 | 1.51E-11 | 7.91E-12 | IFNG/NFYA  |
| BP | GO:004355 regulation   | 20/905 | 58/18866  | 1.11E-12 | 1.58E-11 | 8.30E-12 | TGFB1/SOC  |
| BP | GO:000155 regulation   | 57/905 | 420/18866 | 1.16E-12 | 1.66E-11 | 8.71E-12 | PSMD10/C   |
| BP | GO:000270 negative re  | 19/905 | 52/18866  | 1.23E-12 | 1.74E-11 | 9.15E-12 | HLA-A/HLA  |
| BP | GO:004001 negative re  | 55/905 | 397/18866 | 1.27E-12 | 1.80E-11 | 9.44E-12 | CALR/CXCL  |
| BP | GO:003313 regulation   | 31/905 | 145/18866 | 1.60E-12 | 2.25E-11 | 1.18E-11 | HSP90AA1,  |
| BP | GO:003812 ERBB signa   | 31/905 | 145/18866 | 1.60E-12 | 2.25E-11 | 1.18E-11 | HSP90AA1,  |
| BP | GO:005192 regulation   | 42/905 | 253/18866 | 1.62E-12 | 2.28E-11 | 1.20E-11 | CD4/HSPA2  |
| BP | GO:004354 endothelia   | 45/905 | 286/18866 | 1.79E-12 | 2.51E-11 | 1.32E-11 | CALR/CXCL  |
| BP | GO:003248 negative re  | 18/905 | 47/18866  | 1.88E-12 | 2.61E-11 | 1.37E-11 | RELB/DDX5  |
| BP | GO:005091 negative cl  | 18/905 | 47/18866  | 1.88E-12 | 2.61E-11 | 1.37E-11 | ITGAV/WN   |
| BP | GO:000275 positive re  | 36/905 | 193/18866 | 1.92E-12 | 2.67E-11 | 1.40E-11 | IFNG/S100  |
| BP | GO:000165 temperatu    | 34/905 | 174/18866 | 2.02E-12 | 2.80E-11 | 1.47E-11 | LCN2/IL1B/ |
| BP | GO:004352 regulation   | 38/905 | 214/18866 | 2.27E-12 | 3.14E-11 | 1.65E-11 | HSP90AB1,  |
| BP | GO:003273 positive re  | 20/905 | 60/18866  | 2.29E-12 | 3.16E-11 | 1.66E-11 | IFNG/ORM   |
| BP | GO:001820 peptidyl-se  | 49/905 | 333/18866 | 2.36E-12 | 3.24E-11 | 1.71E-11 | HSP90AA1,  |
| BP | GO:007145 cellular res | 40/905 | 235/18866 | 2.44E-12 | 3.34E-11 | 1.76E-11 | ICAM1/PSM  |
| BP | GO:003412 regulation   | 22/905 | 74/18866  | 2.53E-12 | 3.46E-11 | 1.82E-11 | TLR2/LBP/I |
| BP | GO:003571 CD4-positi   | 25/905 | 97/18866  | 2.86E-12 | 3.89E-11 | 2.04E-11 | CTSL/IFNG, |
| BP | GO:004663 regulation   | 25/905 | 97/18866  | 2.86E-12 | 3.89E-11 | 2.04E-11 | HLA-A/IFN  |
| BP | GO:000756 female pre   | 36/905 | 196/18866 | 3.09E-12 | 4.19E-11 | 2.20E-11 | CALR/CTSB  |
| BP | GO:004226 natural kill | 20/905 | 61/18866  | 3.26E-12 | 4.42E-11 | 2.32E-11 | HLA-A/HLA  |



|    |                                        |        |           |          |          |          |                                                                                                                                                                                                                                                            |
|----|----------------------------------------|--------|-----------|----------|----------|----------|------------------------------------------------------------------------------------------------------------------------------------------------------------------------------------------------------------------------------------------------------------|
| BP | GO:003016 platelet activation          | 32/905 | 158/18866 | 3.29E-12 | 4.45E-11 | 2.34E-11 | FCER1G/CXCL12                                                                                                                                                                                                                                              |
| BP | GO:004884 axon extension               | 16/905 | 37/18866  | 3.44E-12 | 4.63E-11 | 2.43E-11 | CXCL12/VEGFA                                                                                                                                                                                                                                               |
| BP | GO:190228 neuron projection            | 16/905 | 37/18866  | 3.44E-12 | 4.63E-11 | 2.43E-11 | CXCL12/VEGFA                                                                                                                                                                                                                                               |
| BP | GO:003260 interferon-gamma             | 14/905 | 27/18866  | 3.46E-12 | 4.65E-11 | 2.44E-11 | DDX58/IRF1                                                                                                                                                                                                                                                 |
| BP | GO:006219 cellular response            | 51/905 | 360/18866 | 3.63E-12 | 4.86E-11 | 2.55E-11 | RELB/LCN2                                                                                                                                                                                                                                                  |
| BP | GO:004884 regulation                   | 15/905 | 32/18866  | 3.85E-12 | 5.14E-11 | 2.70E-11 | CXCL12/VEGFA                                                                                                                                                                                                                                               |
| BP | GO:000740 axonogenesis                 | 61/905 | 482/18866 | 3.96E-12 | 5.27E-11 | 2.77E-11 | HSP90AA1, HSP70, HSP90AB1, HSP90B1, HSP90C1, HSP90D1, HSP90E1, HSP90F1, HSP90G1, HSP90H1, HSP90I1, HSP90J1, HSP90K1, HSP90L1, HSP90M1, HSP90N1, HSP90O1, HSP90P1, HSP90Q1, HSP90R1, HSP90S1, HSP90T1, HSP90U1, HSP90V1, HSP90W1, HSP90X1, HSP90Y1, HSP90Z1 |
| BP | GO:003629 cellular response            | 38/905 | 218/18866 | 4.09E-12 | 5.43E-11 | 2.85E-11 | ICAM1/PSM1                                                                                                                                                                                                                                                 |
| BP | GO:007145 cellular response            | 37/905 | 208/18866 | 4.19E-12 | 5.55E-11 | 2.92E-11 | ICAM1/PSM1                                                                                                                                                                                                                                                 |
| BP | GO:003162 receptor activity            | 27/905 | 115/18866 | 4.25E-12 | 5.63E-11 | 2.96E-11 | FCER1G/CXCL12                                                                                                                                                                                                                                              |
| BP | GO:200010 negative regulation          | 18/905 | 49/18866  | 4.33E-12 | 5.71E-11 | 3.00E-11 | FCER1G/CXCL12                                                                                                                                                                                                                                              |
| BP | GO:004269 ovulation cycle              | 21/905 | 69/18866  | 4.80E-12 | 6.31E-11 | 3.32E-11 | HSPA5/SRC1                                                                                                                                                                                                                                                 |
| BP | GO:000961 response to hypoxia          | 37/905 | 209/18866 | 4.86E-12 | 6.38E-11 | 3.35E-11 | CXCL10/CXCL12                                                                                                                                                                                                                                              |
| BP | GO:003293 positive regulation          | 12/905 | 19/18866  | 5.10E-12 | 6.68E-11 | 3.51E-11 | TGFB1/MAK                                                                                                                                                                                                                                                  |
| BP | GO:004620 nitric oxide production      | 23/905 | 84/18866  | 5.42E-12 | 7.07E-11 | 3.72E-11 | HSP90AA1, HSP90AB1, HSP90B1, HSP90C1, HSP90D1, HSP90E1, HSP90F1, HSP90G1, HSP90H1, HSP90I1, HSP90J1, HSP90K1, HSP90L1, HSP90M1, HSP90N1, HSP90O1, HSP90P1, HSP90Q1, HSP90R1, HSP90S1, HSP90T1, HSP90U1, HSP90V1, HSP90W1, HSP90X1, HSP90Y1, HSP90Z1        |
| BP | GO:200040 positive regulation          | 16/905 | 38/18866  | 5.68E-12 | 7.40E-11 | 3.89E-11 | CXCL14/CXCL12                                                                                                                                                                                                                                              |
| BP | GO:005127 negative regulation          | 54/905 | 400/18866 | 5.73E-12 | 7.44E-11 | 3.91E-11 | CALR/CXCL12                                                                                                                                                                                                                                                |
| BP | GO:005122 positive regulation          | 50/905 | 354/18866 | 6.64E-12 | 8.61E-11 | 4.52E-11 | HSP90AB1, HSP90B1, HSP90C1, HSP90D1, HSP90E1, HSP90F1, HSP90G1, HSP90H1, HSP90I1, HSP90J1, HSP90K1, HSP90L1, HSP90M1, HSP90N1, HSP90O1, HSP90P1, HSP90Q1, HSP90R1, HSP90S1, HSP90T1, HSP90U1, HSP90V1, HSP90W1, HSP90X1, HSP90Y1, HSP90Z1                  |
| BP | GO:000681 calcium ion import           | 56/905 | 426/18866 | 6.78E-12 | 8.78E-11 | 4.61E-11 | CD4/HSPA5                                                                                                                                                                                                                                                  |
| BP | GO:005109 regulation                   | 51/905 | 367/18866 | 7.56E-12 | 9.76E-11 | 5.13E-11 | B2M/HSP90                                                                                                                                                                                                                                                  |
| BP | GO:200002 regulation                   | 41/905 | 254/18866 | 7.59E-12 | 9.77E-11 | 5.13E-11 | PSMB8/PSI1                                                                                                                                                                                                                                                 |
| BP | GO:004253 positive regulation          | 21/905 | 71/18866  | 8.88E-12 | 1.14E-10 | 5.99E-11 | IFNG/IFNL1                                                                                                                                                                                                                                                 |
| BP | GO:190303 regulation                   | 34/905 | 183/18866 | 8.89E-12 | 1.14E-10 | 5.99E-11 | FCER1G/PLA2                                                                                                                                                                                                                                                |
| BP | GO:200040 regulation                   | 20/905 | 64/18866  | 8.94E-12 | 1.14E-10 | 6.01E-11 | CXCL14/CXCL12                                                                                                                                                                                                                                              |
| BP | GO:007066 negative regulation          | 23/905 | 86/18866  | 9.25E-12 | 1.18E-10 | 6.20E-11 | HLA-G/XCL1                                                                                                                                                                                                                                                 |
| BP | GO:004887 homeostasis                  | 41/905 | 256/18866 | 9.82E-12 | 1.25E-10 | 6.57E-11 | B2M/FCER1                                                                                                                                                                                                                                                  |
| BP | GO:009858 detection cycle              | 13/905 | 24/18866  | 9.99E-12 | 1.27E-10 | 6.67E-11 | HLA-A/HLA-B                                                                                                                                                                                                                                                |
| BP | GO:190122 regulation                   | 27/905 | 119/18866 | 1.01E-11 | 1.27E-10 | 6.70E-11 | CALR/TMS1                                                                                                                                                                                                                                                  |
| BP | GO:004544 fat cell differentiation     | 39/905 | 235/18866 | 1.03E-11 | 1.30E-10 | 6.84E-11 | PSMB8/ERBB2                                                                                                                                                                                                                                                |
| BP | GO:000680 nitric oxide production      | 22/905 | 79/18866  | 1.08E-11 | 1.36E-10 | 7.17E-11 | HSP90AA1, HSP90AB1, HSP90B1, HSP90C1, HSP90D1, HSP90E1, HSP90F1, HSP90G1, HSP90H1, HSP90I1, HSP90J1, HSP90K1, HSP90L1, HSP90M1, HSP90N1, HSP90O1, HSP90P1, HSP90Q1, HSP90R1, HSP90S1, HSP90T1, HSP90U1, HSP90V1, HSP90W1, HSP90X1, HSP90Y1, HSP90Z1        |
| BP | GO:200105 reactive nitrogen production | 23/905 | 87/18866  | 1.20E-11 | 1.51E-10 | 7.94E-11 | HSP90AA1, HSP90AB1, HSP90B1, HSP90C1, HSP90D1, HSP90E1, HSP90F1, HSP90G1, HSP90H1, HSP90I1, HSP90J1, HSP90K1, HSP90L1, HSP90M1, HSP90N1, HSP90O1, HSP90P1, HSP90Q1, HSP90R1, HSP90S1, HSP90T1, HSP90U1, HSP90V1, HSP90W1, HSP90X1, HSP90Y1, HSP90Z1        |
| BP | GO:000018 activation cycle             | 31/905 | 156/18866 | 1.21E-11 | 1.51E-10 | 7.95E-11 | IL1B/TNF-ALPHA                                                                                                                                                                                                                                             |
| BP | GO:007049 interleukin production       | 25/905 | 103/18866 | 1.21E-11 | 1.51E-10 | 7.95E-11 | PSMB8/PSI1                                                                                                                                                                                                                                                 |
| BP | GO:000254 chronic inflammation         | 12/905 | 20/18866  | 1.22E-11 | 1.52E-10 | 8.01E-11 | LTA/CXCL1                                                                                                                                                                                                                                                  |
| BP | GO:006038 pathway-reaction             | 20/905 | 65/18866  | 1.23E-11 | 1.54E-10 | 8.08E-11 | TGFB1/BM1                                                                                                                                                                                                                                                  |
| BP | GO:004677 protein autophagy            | 39/905 | 237/18866 | 1.35E-11 | 1.67E-10 | 8.80E-11 | ADIPOQ/VI                                                                                                                                                                                                                                                  |
| BP | GO:001063 positive regulation          | 33/905 | 176/18866 | 1.39E-11 | 1.72E-10 | 9.06E-11 | CALR/IFNG                                                                                                                                                                                                                                                  |
| BP | GO:007162 regulation                   | 18/905 | 52/18866  | 1.40E-11 | 1.72E-10 | 9.06E-11 | CXCL8/XCL1                                                                                                                                                                                                                                                 |
| BP | GO:200123 positive regulation          | 18/905 | 52/18866  | 1.40E-11 | 1.72E-10 | 9.06E-11 | PDIA3/TNF                                                                                                                                                                                                                                                  |
| BP | GO:006113 morphogenesis                | 34/905 | 187/18866 | 1.66E-11 | 2.05E-10 | 1.08E-10 | TNF/PML2                                                                                                                                                                                                                                                   |
| BP | GO:006040 calcium ion import           | 31/905 | 158/18866 | 1.71E-11 | 2.09E-10 | 1.10E-10 | CD4/CXCL1                                                                                                                                                                                                                                                  |
| BP | GO:190370 negative regulation          | 31/905 | 158/18866 | 1.71E-11 | 2.09E-10 | 1.10E-10 | HLA-G/PGL1                                                                                                                                                                                                                                                 |
| BP | GO:004851 rhythmic process             | 45/905 | 305/18866 | 1.72E-11 | 2.10E-10 | 1.10E-10 | HSPA5/NFY                                                                                                                                                                                                                                                  |
| BP | GO:002260 regulation                   | 61/905 | 499/18866 | 1.73E-11 | 2.11E-10 | 1.11E-10 | CALR/ICAM1                                                                                                                                                                                                                                                 |
| BP | GO:004352 negative regulation          | 30/905 | 149/18866 | 1.83E-11 | 2.23E-10 | 1.17E-10 | HSP90AB1, HSP90B1, HSP90C1, HSP90D1, HSP90E1, HSP90F1, HSP90G1, HSP90H1, HSP90I1, HSP90J1, HSP90K1, HSP90L1, HSP90M1, HSP90N1, HSP90O1, HSP90P1, HSP90Q1, HSP90R1, HSP90S1, HSP90T1, HSP90U1, HSP90V1, HSP90W1, HSP90X1, HSP90Y1, HSP90Z1                  |
| BP | GO:005192 positive regulation          | 27/905 | 122/18866 | 1.87E-11 | 2.27E-10 | 1.19E-10 | CD4/HSPA5                                                                                                                                                                                                                                                  |
| BP | GO:005092 positive regulation          | 13/905 | 25/18866  | 1.99E-11 | 2.41E-10 | 1.27E-10 | CXCL8/CXC                                                                                                                                                                                                                                                  |
| BP | GO:003273 positive regulation          | 18/905 | 53/18866  | 2.02E-11 | 2.44E-10 | 1.28E-10 | IFNG/ORM1                                                                                                                                                                                                                                                  |
| BP | GO:000680 superoxide production        | 21/905 | 74/18866  | 2.14E-11 | 2.59E-10 | 1.36E-10 | TGFB1/NO2                                                                                                                                                                                                                                                  |
| BP | GO:000756 aging                        | 46/905 | 319/18866 | 2.28E-11 | 2.74E-10 | 1.44E-10 | B2M/CALR                                                                                                                                                                                                                                                   |

|    |           |                |        |           |          |          |          |            |
|----|-----------|----------------|--------|-----------|----------|----------|----------|------------|
| BP | GO:003265 | regulation     | 19/905 | 60/18866  | 2.28E-11 | 2.74E-10 | 1.44E-10 | FCER1G/XC  |
| BP | GO:000717 | epidermal      | 27/905 | 123/18866 | 2.29E-11 | 2.74E-10 | 1.44E-10 | TGFB1/MM   |
| BP | GO:000695 | acute-phas     | 17/905 | 47/18866  | 2.29E-11 | 2.74E-10 | 1.44E-10 | IL1B/LBP/C |
| BP | GO:004355 | regulation     | 20/905 | 67/18866  | 2.30E-11 | 2.75E-10 | 1.45E-10 | TGFB1/SOC  |
| BP | GO:004335 | regulation     | 36/905 | 211/18866 | 2.85E-11 | 3.40E-10 | 1.79E-10 | B2M/HSP9   |
| BP | GO:000696 | cellular def   | 18/905 | 54/18866  | 2.89E-11 | 3.42E-10 | 1.80E-10 | HLA-G/KIR: |
| BP | GO:000962 | response tr    | 18/905 | 54/18866  | 2.89E-11 | 3.42E-10 | 1.80E-10 | S100A9/S1  |
| BP | GO:003262 | interleukin    | 18/905 | 54/18866  | 2.89E-11 | 3.42E-10 | 1.80E-10 | CD4/FCER1  |
| BP | GO:003275 | positive re    | 18/905 | 54/18866  | 2.89E-11 | 3.42E-10 | 1.80E-10 | TLR2/IL1B/ |
| BP | GO:000176 | morphogeg      | 35/905 | 201/18866 | 2.98E-11 | 3.51E-10 | 1.84E-10 | TNF/PML/S  |
| BP | GO:003455 | cellular res   | 45/905 | 310/18866 | 3.00E-11 | 3.53E-10 | 1.86E-10 | LCN2/MMF   |
| BP | GO:000282 | negative re    | 17/905 | 48/18866  | 3.39E-11 | 3.97E-10 | 2.09E-10 | HLA-F/HLA  |
| BP | GO:004671 | viral entry    | 18/905 | 134/18866 | 3.41E-11 | 3.99E-10 | 2.10E-10 | CD4/CTSB/  |
| BP | GO:190495 | positive re    | 50/905 | 370/18866 | 3.42E-11 | 3.99E-10 | 2.10E-10 | HSP90AB1,  |
| BP | GO:000270 | negative re    | 16/905 | 42/18866  | 3.55E-11 | 4.13E-10 | 2.17E-10 | HLA-A/HLA  |
| BP | GO:004824 | macrophag      | 16/905 | 42/18866  | 3.55E-11 | 4.13E-10 | 2.17E-10 | CCL5/MAP1  |
| BP | GO:009730 | response tr    | 38/905 | 234/18866 | 3.70E-11 | 4.30E-10 | 2.26E-10 | ICAM1/PSM  |
| BP | GO:004884 | negative re    | 13/905 | 26/18866  | 3.81E-11 | 4.40E-10 | 2.31E-10 | WNT5A/SE   |
| BP | GO:005092 | regulation     | 13/905 | 26/18866  | 3.81E-11 | 4.40E-10 | 2.31E-10 | CXCL8/CXC  |
| BP | GO:001063 | regulation     | 44/905 | 301/18866 | 3.95E-11 | 4.55E-10 | 2.39E-10 | CALR/IFNG  |
| BP | GO:003272 | negative re    | 18/905 | 55/18866  | 4.11E-11 | 4.73E-10 | 2.49E-10 | LBP/ADIPO  |
| BP | GO:006048 | mesenchyr      | 43/905 | 290/18866 | 4.12E-11 | 4.73E-10 | 2.49E-10 | TGFB1/IL1f |
| BP | GO:200123 | positive re    | 33/905 | 183/18866 | 4.16E-11 | 4.76E-10 | 2.50E-10 | PDIA3/S10  |
| BP | GO:004558 | positive re    | 23/905 | 92/18866  | 4.18E-11 | 4.78E-10 | 2.51E-10 | HLA-G/IFN  |
| BP | GO:006035 | regulation     | 19/905 | 62/18866  | 4.36E-11 | 4.97E-10 | 2.61E-10 | TGFB1/BM   |
| BP | GO:005076 | positive re    | 59/905 | 485/18866 | 4.58E-11 | 5.21E-10 | 2.74E-10 | HSPA5/IFN  |
| BP | GO:200073 | regulation     | 26/905 | 118/18866 | 4.90E-11 | 5.57E-10 | 2.93E-10 | PSMB8/PSI  |
| BP | GO:001401 | positive re    | 21/905 | 77/18866  | 4.93E-11 | 5.59E-10 | 2.94E-10 | LTA/TGFB1  |
| BP | GO:004470 | multi-multi    | 37/905 | 226/18866 | 5.26E-11 | 5.95E-10 | 3.13E-10 | CALR/CTSB  |
| BP | GO:003267 | regulation     | 23/905 | 93/18866  | 5.30E-11 | 5.99E-10 | 3.15E-10 | TMSB4X/TI  |
| BP | GO:000236 | T cell cytok   | 16/905 | 43/18866  | 5.40E-11 | 6.07E-10 | 3.19E-10 | B2M/HLA-   |
| BP | GO:000282 | negative re    | 16/905 | 43/18866  | 5.40E-11 | 6.07E-10 | 3.19E-10 | HLA-F/HLA  |
| BP | GO:003292 | regulation     | 12/905 | 22/18866  | 5.73E-11 | 6.43E-10 | 3.38E-10 | TGFB1/MA   |
| BP | GO:000691 | activation     | 22/905 | 86/18866  | 6.80E-11 | 7.61E-10 | 4.00E-10 | S100A9/S1  |
| BP | GO:190162 | regulation     | 13/905 | 27/18866  | 7.02E-11 | 7.84E-10 | 4.12E-10 | CXCL14/CX  |
| BP | GO:000741 | axon guida     | 42/905 | 284/18866 | 7.57E-11 | 8.44E-10 | 4.44E-10 | CXCL12/VE  |
| BP | GO:004876 | mesenchyr      | 37/905 | 229/18866 | 7.80E-11 | 8.68E-10 | 4.56E-10 | TGFB1/IL1f |
| BP | GO:003268 | negative re    | 15/905 | 38/18866  | 8.02E-11 | 8.91E-10 | 4.68E-10 | XCL1/PGLY  |
| BP | GO:006076 | positive re    | 18/905 | 57/18866  | 8.09E-11 | 8.94E-10 | 4.70E-10 | MMP12/TL   |
| BP | GO:190551 | macrophag      | 18/905 | 57/18866  | 8.09E-11 | 8.94E-10 | 4.70E-10 | CCL5/MAP1  |
| BP | GO:000243 | inflammatc     | 19/905 | 64/18866  | 8.11E-11 | 8.95E-10 | 4.70E-10 | FCER1G/IC  |
| BP | GO:190372 | regulation     | 23/905 | 95/18866  | 8.46E-11 | 9.31E-10 | 4.90E-10 | TGFB1/FAE  |
| BP | GO:009748 | neuron prc     | 42/905 | 285/18866 | 8.48E-11 | 9.32E-10 | 4.90E-10 | CXCL12/VE  |
| BP | GO:001000 | glial cell dif | 37/905 | 230/18866 | 8.88E-11 | 9.74E-10 | 5.12E-10 | IFNG/S100  |
| BP | GO:004873 | gland deve     | 55/905 | 443/18866 | 9.76E-11 | 1.07E-09 | 5.61E-10 | TGFB1/TNF  |
| BP | GO:001056 | regulation     | 33/905 | 189/18866 | 1.02E-10 | 1.11E-09 | 5.83E-10 | PSMB8/PSI  |
| BP | GO:003461 | cellular res   | 31/905 | 170/18866 | 1.21E-10 | 1.31E-09 | 6.91E-10 | LCN2/MMF   |
| BP | GO:007083 | divalent m     | 57/905 | 471/18866 | 1.21E-10 | 1.31E-09 | 6.91E-10 | CD4/HSPA:  |
| BP | GO:190266 | negative re    | 13/905 | 28/18866  | 1.25E-10 | 1.36E-09 | 7.15E-10 | WNT5A/SE   |
| BP | GO:001095 | regulation     | 51/905 | 396/18866 | 1.28E-10 | 1.38E-09 | 7.27E-10 | B2M/CD4/   |

|    |           |               |        |           |          |          |          |            |
|----|-----------|---------------|--------|-----------|----------|----------|----------|------------|
| BP | GO:006104 | regulation    | 29/905 | 151/18866 | 1.32E-10 | 1.42E-09 | 7.49E-10 | FCER1G/PL  |
| BP | GO:000759 | hemostasis    | 47/905 | 348/18866 | 1.37E-10 | 1.48E-09 | 7.76E-10 | FCER1G/PF  |
| BP | GO:190533 | regulation    | 32/905 | 181/18866 | 1.40E-10 | 1.50E-09 | 7.91E-10 | PSMB8/PSI  |
| BP | GO:003166 | response to   | 57/905 | 473/18866 | 1.42E-10 | 1.53E-09 | 8.05E-10 | CD4/HSPA5  |
| BP | GO:190355 | positive re   | 17/905 | 52/18866  | 1.46E-10 | 1.57E-09 | 8.24E-10 | FCER1G/IFI |
| BP | GO:005120 | sequester     | 26/905 | 124/18866 | 1.58E-10 | 1.69E-09 | 8.89E-10 | CALR/CXCL  |
| BP | GO:004583 | positive re   | 29/905 | 153/18866 | 1.83E-10 | 1.96E-09 | 1.03E-09 | IFNG/TGFB  |
| BP | GO:005069 | regulation    | 15/905 | 40/18866  | 1.91E-10 | 2.03E-09 | 1.07E-09 | MICB/MMI   |
| BP | GO:007251 | divalent in   | 57/905 | 478/18866 | 2.14E-10 | 2.28E-09 | 1.20E-09 | CD4/HSPA5  |
| BP | GO:006184 | antimicrob    | 20/905 | 75/18866  | 2.22E-10 | 2.36E-09 | 1.24E-09 | CXCL14/CX  |
| BP | GO:004684 | bone remo     | 22/905 | 91/18866  | 2.24E-10 | 2.37E-09 | 1.25E-09 | TGFB1/NO   |
| BP | GO:004580 | positive re   | 23/905 | 100/18866 | 2.56E-10 | 2.71E-09 | 1.43E-09 | B2M/VEGF   |
| BP | GO:004542 | regulation    | 19/905 | 68/18866  | 2.60E-10 | 2.74E-09 | 1.44E-09 | HSP90AA1,  |
| BP | GO:000759 | blood coag    | 46/905 | 343/18866 | 2.73E-10 | 2.88E-09 | 1.51E-09 | FCER1G/PF  |
| BP | GO:003808 | peptidyl-ty   | 15/905 | 41/18866  | 2.87E-10 | 3.02E-09 | 1.59E-09 | VEGFA/MA   |
| BP | GO:003018 | B cell differ | 27/905 | 137/18866 | 3.10E-10 | 3.26E-09 | 1.71E-09 | CD40LG/PT  |
| BP | GO:003263 | interleukin   | 23/905 | 101/18866 | 3.17E-10 | 3.32E-09 | 1.74E-09 | TMSB4X/TI  |
| BP | GO:004563 | positive re   | 23/905 | 101/18866 | 3.17E-10 | 3.32E-09 | 1.74E-09 | CD4/IFNG/  |
| BP | GO:003272 | positive re   | 11/905 | 20/18866  | 3.29E-10 | 3.43E-09 | 1.80E-09 | DDX58/IRF  |
| BP | GO:004666 | female sex    | 25/905 | 119/18866 | 3.40E-10 | 3.54E-09 | 1.86E-09 | HSPA5/ICA  |
| BP | GO:006109 | regulation    | 22/905 | 93/18866  | 3.52E-10 | 3.66E-09 | 1.92E-09 | NOX4/CCL5  |
| BP | GO:001080 | regulation    | 18/905 | 62/18866  | 3.84E-10 | 3.98E-09 | 2.09E-09 | TNF/ADIPC  |
| BP | GO:003088 | regulation    | 18/905 | 62/18866  | 3.84E-10 | 3.98E-09 | 2.09E-09 | TFRC/CD40  |
| BP | GO:006040 | cytosolic c   | 31/905 | 178/18866 | 4.00E-10 | 4.13E-09 | 2.17E-09 | CD4/CXCL1  |
| BP | GO:000270 | negative re   | 14/905 | 36/18866  | 4.37E-10 | 4.51E-09 | 2.37E-09 | HLA-F/XCL1 |
| BP | GO:000959 | detection c   | 14/905 | 36/18866  | 4.37E-10 | 4.51E-09 | 2.37E-09 | HLA-A/HLA  |
| BP | GO:001491 | regulation    | 21/905 | 86/18866  | 4.70E-10 | 4.83E-09 | 2.54E-09 | PLAU/NOX   |
| BP | GO:190165 | response to   | 33/905 | 200/18866 | 4.71E-10 | 4.83E-09 | 2.54E-09 | CALR/ICAM  |
| BP | GO:004336 | CD4-positi    | 20/905 | 78/18866  | 4.77E-10 | 4.88E-09 | 2.57E-09 | CTSL/IFNG, |
| BP | GO:005081 | coagulation   | 46/905 | 349/18866 | 4.87E-10 | 4.98E-09 | 2.62E-09 | FCER1G/PF  |
| BP | GO:000301 | vascular pr   | 32/905 | 190/18866 | 5.05E-10 | 5.15E-09 | 2.71E-09 | ICAM1/TGI  |
| BP | GO:000267 | regulation    | 16/905 | 49/18866  | 5.20E-10 | 5.29E-09 | 2.78E-09 | FCER1G/IL  |
| BP | GO:004687 | hormone s     | 43/905 | 314/18866 | 5.43E-10 | 5.52E-09 | 2.90E-09 | IFNG/IL1B/ |
| BP | GO:003027 | regulation    | 34/905 | 212/18866 | 5.60E-10 | 5.68E-09 | 2.98E-09 | TGFB1/LTF  |
| BP | GO:000225 | T cell differ | 19/905 | 71/18866  | 5.86E-10 | 5.93E-09 | 3.12E-09 | FCER1G/IFI |
| BP | GO:003235 | response to   | 27/905 | 141/18866 | 6.11E-10 | 6.17E-09 | 3.24E-09 | CALR/CD4/  |
| BP | GO:000754 | sex differ    | 40/905 | 280/18866 | 6.16E-10 | 6.22E-09 | 3.27E-09 | HSPA5/ICA  |
| BP | GO:014013 | positive re   | 11/905 | 21/18866  | 6.61E-10 | 6.66E-09 | 3.50E-09 | CXCL14/CX  |
| BP | GO:001059 | positive re   | 26/905 | 132/18866 | 6.69E-10 | 6.72E-09 | 3.53E-09 | CALR/TMSI  |
| BP | GO:009032 | regulation    | 14/905 | 37/18866  | 6.73E-10 | 6.75E-09 | 3.55E-09 | TGFB1/TNF  |
| BP | GO:004867 | axon exten    | 25/905 | 123/18866 | 7.12E-10 | 7.13E-09 | 3.75E-09 | HSP90AA1,  |
| BP | GO:190552 | positive re   | 12/905 | 26/18866  | 7.16E-10 | 7.16E-09 | 3.76E-09 | CCL5/MAP1  |
| BP | GO:003276 | positive re   | 16/905 | 50/18866  | 7.30E-10 | 7.29E-09 | 3.83E-09 | FCER1G/TL  |
| BP | GO:005071 | positive re   | 30/905 | 172/18866 | 7.37E-10 | 7.34E-09 | 3.86E-09 | IFNG/TGFB  |
| BP | GO:003164 | heat gener    | 10/905 | 17/18866  | 8.79E-10 | 8.74E-09 | 4.59E-09 | IL1B/TNF/T |
| BP | GO:004663 | alpha-beta    | 23/905 | 106/18866 | 8.81E-10 | 8.74E-09 | 4.59E-09 | CTSL/IFNG, |
| BP | GO:190266 | regulation    | 15/905 | 44/18866  | 9.10E-10 | 8.99E-09 | 4.73E-09 | CXCL12/VE  |
| BP | GO:190552 | regulation    | 15/905 | 44/18866  | 9.10E-10 | 8.99E-09 | 4.73E-09 | CCL5/MAP1  |
| BP | GO:003196 | response to   | 29/905 | 164/18866 | 1.01E-09 | 1.00E-08 | 5.26E-09 | ICAM1/S1C  |
| BP | GO:001074 | macrophag     | 14/905 | 38/18866  | 1.02E-09 | 1.00E-08 | 5.26E-09 | TGFB1/CET  |

|    |           |              |        |           |          |          |          |            |
|----|-----------|--------------|--------|-----------|----------|----------|----------|------------|
| BP | GO:009007 | foam cell d  | 14/905 | 38/18866  | 1.02E-09 | 1.00E-08 | 5.26E-09 | TGFB1/CET  |
| BP | GO:190342 | regulation   | 23/905 | 107/18866 | 1.07E-09 | 1.05E-08 | 5.53E-09 | HSP90AA1,  |
| BP | GO:000166 | fever gene   | 8/905  | 10/18866  | 1.12E-09 | 1.10E-08 | 5.79E-09 | IL1B/TNF/T |
| BP | GO:001076 | regulation   | 42/905 | 310/18866 | 1.20E-09 | 1.17E-08 | 6.17E-09 | CALR/CXCL  |
| BP | GO:005083 | defense re   | 22/905 | 99/18866  | 1.26E-09 | 1.23E-08 | 6.48E-09 | HLA-A/MR   |
| BP | GO:000271 | regulation   | 15/905 | 45/18866  | 1.30E-09 | 1.27E-08 | 6.68E-09 | HLA-A/HLA  |
| BP | GO:000991 | hormone ti   | 43/905 | 323/18866 | 1.32E-09 | 1.28E-08 | 6.75E-09 | IFNG/IL1B/ |
| BP | GO:000189 | placenta d   | 28/905 | 156/18866 | 1.38E-09 | 1.34E-08 | 7.06E-09 | CTSB/HSP9  |
| BP | GO:003410 | regulation   | 21/905 | 91/18866  | 1.44E-09 | 1.39E-08 | 7.33E-09 | TGFB1/TFR  |
| BP | GO:003302 | myeloid ce   | 13/905 | 33/18866  | 1.53E-09 | 1.48E-08 | 7.77E-09 | CTSL/FCER  |
| BP | GO:004355 | positive re  | 13/905 | 33/18866  | 1.53E-09 | 1.48E-08 | 7.77E-09 | TGFB1/SRC  |
| BP | GO:005120 | release of   | 24/905 | 118/18866 | 1.53E-09 | 1.48E-08 | 7.77E-09 | CXCL10/CX  |
| BP | GO:004512 | cellular ext | 18/905 | 67/18866  | 1.55E-09 | 1.49E-08 | 7.83E-09 | ICAM1/CXC  |
| BP | GO:004592 | negative re  | 37/905 | 254/18866 | 1.57E-09 | 1.51E-08 | 7.93E-09 | TGFB1/RBF  |
| BP | GO:004361 | regulation   | 23/905 | 109/18866 | 1.57E-09 | 1.51E-08 | 7.94E-09 | HSPA5/PSM  |
| BP | GO:007149 | cellular res | 43/905 | 326/18866 | 1.76E-09 | 1.68E-08 | 8.84E-09 | HSPA5/ICA  |
| BP | GO:009719 | intrinsic ap | 40/905 | 290/18866 | 1.76E-09 | 1.68E-08 | 8.84E-09 | CXCL12/S1  |
| BP | GO:006109 | positive re  | 17/905 | 60/18866  | 1.79E-09 | 1.71E-08 | 8.99E-09 | NOX4/CCL5  |
| BP | GO:005128 | negative re  | 24/905 | 119/18866 | 1.84E-09 | 1.75E-08 | 9.18E-09 | CXCL10/CX  |
| BP | GO:005079 | activated T  | 15/905 | 46/18866  | 1.85E-09 | 1.76E-08 | 9.24E-09 | AGER/EPO,  |
| BP | GO:001057 | positive re  | 12/905 | 28/18866  | 2.06E-09 | 1.95E-08 | 1.03E-08 | TGFB1/IL1E |
| BP | GO:001081 | T cell chem  | 12/905 | 28/18866  | 2.06E-09 | 1.95E-08 | 1.03E-08 | CXCL10/CX  |
| BP | GO:001490 | smooth ml    | 21/905 | 93/18866  | 2.20E-09 | 2.07E-08 | 1.09E-08 | PLAU/NOX   |
| BP | GO:003208 | negative re  | 21/905 | 93/18866  | 2.20E-09 | 2.07E-08 | 1.09E-08 | PSMD10/T   |
| BP | GO:005105 | negative re  | 55/905 | 483/18866 | 2.44E-09 | 2.30E-08 | 1.21E-08 | HLA-F/ICAM |
| BP | GO:011011 | positive re  | 20/905 | 85/18866  | 2.46E-09 | 2.31E-08 | 1.21E-08 | VEGFA/TNI  |
| BP | GO:009755 | calcium ior  | 26/905 | 140/18866 | 2.51E-09 | 2.36E-08 | 1.24E-08 | CXCL10/CX  |
| BP | GO:000165 | urogenital   | 43/905 | 330/18866 | 2.57E-09 | 2.41E-08 | 1.26E-08 | MMP9/RBF   |
| BP | GO:005128 | regulation   | 24/905 | 121/18866 | 2.61E-09 | 2.44E-08 | 1.28E-08 | CXCL10/CX  |
| BP | GO:006056 | developme    | 35/905 | 236/18866 | 2.68E-09 | 2.51E-08 | 1.32E-08 | HSP90AA1,  |
| BP | GO:000758 | response ti  | 29/905 | 171/18866 | 2.77E-09 | 2.58E-08 | 1.36E-08 | CD4/LTA/C  |
| BP | GO:004866 | positive re  | 22/905 | 103/18866 | 2.80E-09 | 2.60E-08 | 1.37E-08 | MMP9/TNI   |
| BP | GO:004226 | regulation   | 14/905 | 41/18866  | 3.24E-09 | 3.01E-08 | 1.58E-08 | HLA-A/HLA  |
| BP | GO:005083 | defense re   | 14/905 | 41/18866  | 3.24E-09 | 3.01E-08 | 1.58E-08 | S100A9/S1  |
| BP | GO:007162 | positive re  | 12/905 | 29/18866  | 3.37E-09 | 3.11E-08 | 1.63E-08 | CXCL8/XCL  |
| BP | GO:001059 | regulation   | 35/905 | 238/18866 | 3.37E-09 | 3.11E-08 | 1.63E-08 | CALR/CXCL  |
| BP | GO:003253 | regulation   | 47/905 | 383/18866 | 3.37E-09 | 3.11E-08 | 1.63E-08 | HSP90AB1,  |
| BP | GO:004562 | negative re  | 16/905 | 55/18866  | 3.52E-09 | 3.24E-08 | 1.70E-08 | PGLYRP1/P  |
| BP | GO:009880 | regulation   | 13/905 | 35/18866  | 3.61E-09 | 3.32E-08 | 1.74E-08 | ADIPOQ/F2  |
| BP | GO:001086 | positive re  | 15/905 | 48/18866  | 3.61E-09 | 3.32E-08 | 1.74E-08 | TGFB1/BM   |
| BP | GO:006108 | positive re  | 10/905 | 19/18866  | 3.82E-09 | 3.50E-08 | 1.84E-08 | FCER1G/HI  |
| BP | GO:003574 | natural kill | 8/905  | 11/18866  | 3.95E-09 | 3.61E-08 | 1.90E-08 | CXCL14/XC  |
| BP | GO:000240 | dendritic c  | 11/905 | 24/18866  | 4.09E-09 | 3.72E-08 | 1.96E-08 | CALR/CCL5  |
| BP | GO:003134 | negative re  | 11/905 | 24/18866  | 4.09E-09 | 3.72E-08 | 1.96E-08 | HLA-A/HLA  |
| BP | GO:004663 | positive re  | 17/905 | 63/18866  | 4.10E-09 | 3.72E-08 | 1.96E-08 | HLA-A/IFN  |
| BP | GO:200051 | regulation   | 17/905 | 63/18866  | 4.10E-09 | 3.72E-08 | 1.96E-08 | IFNG/XCL1, |
| BP | GO:005067 | negative re  | 19/905 | 79/18866  | 4.15E-09 | 3.77E-08 | 1.98E-08 | HLA-G/XCL  |
| BP | GO:004362 | regulation   | 23/905 | 115/18866 | 4.72E-09 | 4.27E-08 | 2.25E-08 | HSPA5/PSM  |
| BP | GO:004864 | negative re  | 23/905 | 115/18866 | 4.72E-09 | 4.27E-08 | 2.25E-08 | RBP4/WNT   |
| BP | GO:001481 | muscle cell  | 22/905 | 106/18866 | 4.94E-09 | 4.46E-08 | 2.34E-08 | PLAU/NOX   |

|    |           |             |        |           |          |          |          |                   |
|----|-----------|-------------|--------|-----------|----------|----------|----------|-------------------|
| BP | GO:003266 | regulation  | 15/905 | 49/18866  | 4.98E-09 | 4.48E-08 | 2.36E-08 | CD4/XCL1/         |
| BP | GO:005077 | regulation  | 30/905 | 186/18866 | 5.02E-09 | 4.52E-08 | 2.38E-08 | CXCL12/VE         |
| BP | GO:001403 | neural cres | 19/905 | 80/18866  | 5.20E-09 | 4.67E-08 | 2.45E-08 | MAPK3/ED          |
| BP | GO:003294 | negative re | 19/905 | 80/18866  | 5.20E-09 | 4.67E-08 | 2.45E-08 | HLA-G/XCL         |
| BP | GO:001075 | regulation  | 12/905 | 30/18866  | 5.36E-09 | 4.78E-08 | 2.51E-08 | CCL5/MAP          |
| BP | GO:003272 | positive re | 12/905 | 30/18866  | 5.36E-09 | 4.78E-08 | 2.51E-08 | TLR2/DDX5         |
| BP | GO:003566 | TRIF-deper  | 12/905 | 30/18866  | 5.36E-09 | 4.78E-08 | 2.51E-08 | IRF3/TLR3/        |
| BP | GO:006108 | myeloid lei | 12/905 | 30/18866  | 5.36E-09 | 4.78E-08 | 2.51E-08 | FCER1G/HI         |
| BP | GO:000275 | MyD88-de    | 13/905 | 36/18866  | 5.40E-09 | 4.80E-08 | 2.52E-08 | TLR2/IRF1/        |
| BP | GO:004663 | alpha-beta  | 13/905 | 36/18866  | 5.40E-09 | 4.80E-08 | 2.52E-08 | HLA-A/XCL         |
| BP | GO:005066 | cytokine se | 18/905 | 72/18866  | 5.46E-09 | 4.84E-08 | 2.55E-08 | IFNG/TLR2,        |
| BP | GO:000862 | extrinsic a | 20/905 | 89/18866  | 5.78E-09 | 5.12E-08 | 2.69E-08 | ICAM1/TNI         |
| BP | GO:004688 | regulation  | 37/905 | 267/18866 | 6.30E-09 | 5.57E-08 | 2.93E-08 | IFNG/IL1B/        |
| BP | GO:000196 | positive re | 15/905 | 50/18866  | 6.80E-09 | 5.99E-08 | 3.15E-08 | MMP12/IR          |
| BP | GO:007022 | lymphocyt   | 18/905 | 73/18866  | 6.93E-09 | 6.09E-08 | 3.20E-08 | IDO1/CCL5         |
| BP | GO:190203 | regulation  | 18/905 | 73/18866  | 6.93E-09 | 6.09E-08 | 3.20E-08 | PSMB8/PSI         |
| BP | GO:000209 | positive re | 11/905 | 25/18866  | 7.00E-09 | 6.12E-08 | 3.22E-08 | VEGFA/ARI         |
| BP | GO:004669 | decidualiza | 11/905 | 25/18866  | 7.00E-09 | 6.12E-08 | 3.22E-08 | CTSB/MAP          |
| BP | GO:007167 | positive re | 11/905 | 25/18866  | 7.00E-09 | 6.12E-08 | 3.22E-08 | CXCL10/CX         |
| BP | GO:004232 | negative re | 54/905 | 484/18866 | 7.00E-09 | 6.12E-08 | 3.22E-08 | IFNG/PSMI         |
| BP | GO:007054 | response tr | 20/905 | 90/18866  | 7.11E-09 | 6.20E-08 | 3.26E-08 | TLR2/FABP         |
| BP | GO:000722 | integrin-m  | 22/905 | 108/18866 | 7.13E-09 | 6.21E-08 | 3.26E-08 | FCER1G/IS         |
| BP | GO:000191 | negative re | 10/905 | 20/18866  | 7.32E-09 | 6.35E-08 | 3.34E-08 | HLA-A/HLA         |
| BP | GO:000282 | positive re | 10/905 | 20/18866  | 7.32E-09 | 6.35E-08 | 3.34E-08 | XCL1/IL1B/        |
| BP | GO:009021 | positive re | 13/905 | 37/18866  | 7.97E-09 | 6.91E-08 | 3.63E-08 | TGFB1/SRC         |
| BP | GO:003505 | cardiocyte  | 27/905 | 158/18866 | 8.21E-09 | 7.10E-08 | 3.73E-08 | CALR/TGFE         |
| BP | GO:003030 | negative re | 30/905 | 190/18866 | 8.36E-09 | 7.21E-08 | 3.79E-08 | TGFB1/PM          |
| BP | GO:005104 | negative re | 30/905 | 190/18866 | 8.36E-09 | 7.21E-08 | 3.79E-08 | HLA-F/IL1B        |
| BP | GO:000267 | positive re | 12/905 | 31/18866  | 8.37E-09 | 7.21E-08 | 3.79E-08 | FCER1G/IL         |
| BP | GO:190289 | regulation  | 15/905 | 51/18866  | 9.20E-09 | 7.91E-08 | 4.16E-08 | TGFB1/TNF         |
| BP | GO:009702 | dendritic c | 14/905 | 44/18866  | 9.25E-09 | 7.92E-08 | 4.16E-08 | HLA-B/HLA         |
| BP | GO:200040 | regulation  | 14/905 | 44/18866  | 9.25E-09 | 7.92E-08 | 4.16E-08 | CXCL10/CX         |
| BP | GO:004870 | astrocyte d | 19/905 | 83/18866  | 1.00E-08 | 8.57E-08 | 4.50E-08 | IFNG/S100.        |
| BP | GO:004325 | regulation  | 51/905 | 449/18866 | 1.02E-08 | 8.72E-08 | 4.58E-08 | HSPA5/HSF         |
| BP | GO:004858 | developme   | 34/905 | 237/18866 | 1.07E-08 | 9.13E-08 | 4.80E-08 | HSP90AA1,         |
| BP | GO:004595 | negative re | 9/905  | 16/18866  | 1.09E-08 | 9.29E-08 | 4.88E-08 | HLA-A/HLA         |
| BP | GO:000717 | transmem    | 44/905 | 359/18866 | 1.11E-08 | 9.45E-08 | 4.97E-08 | HSPA5/HSF         |
| BP | GO:003158 | cell-substr | 44/905 | 359/18866 | 1.11E-08 | 9.45E-08 | 4.97E-08 | CALR/MMF          |
| BP | GO:003273 | positive re | 13/905 | 38/18866  | 1.16E-08 | 9.80E-08 | 5.15E-08 | FCER1G/XC         |
| BP | GO:009002 | positive re | 11/905 | 26/18866  | 1.16E-08 | 9.80E-08 | 5.15E-08 | CXCL8/XCL         |
| BP | GO:009002 | regulation  | 11/905 | 26/18866  | 1.16E-08 | 9.80E-08 | 5.15E-08 | CXCL10/CX         |
| BP | GO:006138 | regulation  | 22/905 | 111/18866 | 1.21E-08 | 1.02E-07 | 5.38E-08 | CXCL12/VE         |
| BP | GO:001403 | mesenchyr   | 19/905 | 84/18866  | 1.24E-08 | 1.04E-07 | 5.47E-08 | MAPK3/ED          |
| BP | GO:004886 | stem cell d | 19/905 | 84/18866  | 1.24E-08 | 1.04E-07 | 5.47E-08 | MAPK3/ED          |
| BP | GO:000272 | regulation  | 12/905 | 32/18866  | 1.28E-08 | 1.07E-07 | 5.64E-08 | B2M/HLA- <i>I</i> |
| BP | GO:001074 | regulation  | 12/905 | 32/18866  | 1.28E-08 | 1.07E-07 | 5.64E-08 | CETP/ADIP         |
| BP | GO:003272 | positive re | 14/905 | 45/18866  | 1.28E-08 | 1.07E-07 | 5.64E-08 | TLR2/IL1B/        |
| BP | GO:004542 | positive re | 14/905 | 45/18866  | 1.28E-08 | 1.07E-07 | 5.64E-08 | HSP90AA1,         |
| BP | GO:000253 | production  | 20/905 | 93/18866  | 1.29E-08 | 1.08E-07 | 5.67E-08 | FCER1G/LB         |
| BP | GO:003545 | response tr | 10/905 | 21/18866  | 1.34E-08 | 1.11E-07 | 5.85E-08 | EIF2AK2/B         |

|    |           |              |        |           |          |          |          |             |
|----|-----------|--------------|--------|-----------|----------|----------|----------|-------------|
| BP | GO:004830 | immunologic  | 10/905 | 21/18866  | 1.34E-08 | 1.11E-07 | 5.85E-08 | RBP4/TNF/   |
| BP | GO:000263 | regulation   | 17/905 | 68/18866  | 1.45E-08 | 1.20E-07 | 6.33E-08 | XLCL1/TGFB  |
| BP | GO:006161 | pri-miRNA    | 15/905 | 53/18866  | 1.65E-08 | 1.37E-07 | 7.19E-08 | TGFB1/TNF   |
| BP | GO:004205 | type 2 imm   | 13/905 | 39/18866  | 1.66E-08 | 1.38E-07 | 7.23E-08 | XLCL1/IFNL1 |
| BP | GO:006141 | regulation   | 18/905 | 77/18866  | 1.72E-08 | 1.42E-07 | 7.47E-08 | PSMB8/PSI   |
| BP | GO:190440 | positive re  | 14/905 | 46/18866  | 1.76E-08 | 1.46E-07 | 7.65E-08 | HSP90AA1,   |
| BP | GO:004866 | negative re  | 17/905 | 69/18866  | 1.84E-08 | 1.52E-07 | 7.97E-08 | IFNG/APOE   |
| BP | GO:003090 | forebrain d  | 46/905 | 391/18866 | 1.86E-08 | 1.53E-07 | 8.04E-08 | B2M/CXCL    |
| BP | GO:190153 | regulation   | 19/905 | 86/18866  | 1.87E-08 | 1.53E-07 | 8.06E-08 | PSMB8/PSI   |
| BP | GO:000193 | negative re  | 50/905 | 444/18866 | 1.89E-08 | 1.55E-07 | 8.14E-08 | IFNG/PSMI   |
| BP | GO:004863 | regulation   | 43/905 | 353/18866 | 1.96E-08 | 1.61E-07 | 8.44E-08 | CXCL12/RB   |
| BP | GO:000226 | myeloid ce   | 26/905 | 154/18866 | 2.00E-08 | 1.64E-07 | 8.61E-08 | B2M/FCER    |
| BP | GO:006201 | positive re  | 26/905 | 154/18866 | 2.00E-08 | 1.64E-07 | 8.61E-08 | IFNG/TMSF   |
| BP | GO:006039 | SMAD prot    | 18/905 | 78/18866  | 2.13E-08 | 1.74E-07 | 9.15E-08 | TGFB1/FO    |
| BP | GO:000271 | negative re  | 9/905  | 17/18866  | 2.22E-08 | 1.81E-07 | 9.50E-08 | HLA-A/HLA   |
| BP | GO:000692 | inflammato   | 10/905 | 22/18866  | 2.35E-08 | 1.91E-07 | 1.00E-07 | CTSL/IRF3/  |
| BP | GO:190289 | positive re  | 13/905 | 40/18866  | 2.35E-08 | 1.91E-07 | 1.00E-07 | TGFB1/TNF   |
| BP | GO:003133 | positive re  | 35/905 | 257/18866 | 2.53E-08 | 2.05E-07 | 1.08E-07 | HSP90AA1,   |
| BP | GO:007126 | cellular res | 18/905 | 79/18866  | 2.64E-08 | 2.14E-07 | 1.12E-07 | IL1B/TLR3/  |
| BP | GO:003051 | regulation   | 20/905 | 97/18866  | 2.76E-08 | 2.23E-07 | 1.17E-07 | CXCL12/VE   |
| BP | GO:190121 | positive re  | 20/905 | 97/18866  | 2.76E-08 | 2.23E-07 | 1.17E-07 | IFNG/TNF/   |
| BP | GO:000975 | hormone-r    | 30/905 | 200/18866 | 2.80E-08 | 2.25E-07 | 1.18E-07 | CALR/SRC/   |
| BP | GO:004254 | response tr  | 25/905 | 146/18866 | 2.80E-08 | 2.25E-07 | 1.18E-07 | LCN2/STAT   |
| BP | GO:003165 | regulation   | 8/905  | 13/18866  | 2.82E-08 | 2.27E-07 | 1.19E-07 | IL1B/TNF/T  |
| BP | GO:000275 | MyD88-ind    | 12/905 | 34/18866  | 2.85E-08 | 2.28E-07 | 1.20E-07 | IRF3/TLR3/  |
| BP | GO:007023 | regulation   | 12/905 | 34/18866  | 2.85E-08 | 2.28E-07 | 1.20E-07 | IDO1/CCL5   |
| BP | GO:190401 | epithelial c | 22/905 | 117/18866 | 3.32E-08 | 2.66E-07 | 1.40E-07 | HLA-G/ICAM  |
| BP | GO:001403 | neural cres  | 19/905 | 89/18866  | 3.38E-08 | 2.70E-07 | 1.42E-07 | MAPK3/ED    |
| BP | GO:004218 | cellular ket | 35/905 | 260/18866 | 3.41E-08 | 2.72E-07 | 1.43E-07 | PSMB8/PSI   |
| BP | GO:000175 | neural cres  | 15/905 | 56/18866  | 3.75E-08 | 2.97E-07 | 1.56E-07 | EDN3/SEM    |
| BP | GO:000271 | regulation   | 15/905 | 56/18866  | 3.75E-08 | 2.97E-07 | 1.56E-07 | FCER1G/LT   |
| BP | GO:000288 | regulation   | 15/905 | 56/18866  | 3.75E-08 | 2.97E-07 | 1.56E-07 | FCER1G/LT   |
| BP | GO:007022 | regulation   | 15/905 | 56/18866  | 3.75E-08 | 2.97E-07 | 1.56E-07 | IDO1/CCL5   |
| BP | GO:004213 | negative re  | 16/905 | 64/18866  | 3.85E-08 | 3.05E-07 | 1.60E-07 | HLA-G/XCL   |
| BP | GO:001401 | regulation   | 23/905 | 128/18866 | 3.96E-08 | 3.13E-07 | 1.64E-07 | LTA/TGFB1   |
| BP | GO:004564 | regulation   | 10/905 | 23/18866  | 3.97E-08 | 3.13E-07 | 1.65E-07 | TGFB1/ADI   |
| BP | GO:007267 | eosinophil   | 10/905 | 23/18866  | 3.97E-08 | 3.13E-07 | 1.65E-07 | CCL13/CCL   |
| BP | GO:005082 | defense re:  | 18/905 | 81/18866  | 4.00E-08 | 3.15E-07 | 1.66E-07 | CD4/MR1/    |
| BP | GO:004205 | regulation   | 19/905 | 90/18866  | 4.09E-08 | 3.22E-07 | 1.69E-07 | MMP9/FAS    |
| BP | GO:000836 | regulation   | 28/905 | 181/18866 | 4.11E-08 | 3.23E-07 | 1.70E-07 | HSP90AB1,   |
| BP | GO:006033 | regulation   | 12/905 | 35/18866  | 4.14E-08 | 3.24E-07 | 1.70E-07 | HSP90AB1,   |
| BP | GO:007067 | response tr  | 12/905 | 35/18866  | 4.14E-08 | 3.24E-07 | 1.70E-07 | HSPA5/HSF   |
| BP | GO:006144 | connective   | 35/905 | 262/18866 | 4.15E-08 | 3.24E-07 | 1.70E-07 | TGFB1/MA    |
| BP | GO:001407 | response tr  | 25/905 | 149/18866 | 4.25E-08 | 3.31E-07 | 1.74E-07 | HSPA5/IL1I  |
| BP | GO:005102 | regulation   | 9/905  | 18/18866  | 4.25E-08 | 3.31E-07 | 1.74E-07 | RBP4/TNF/   |
| BP | GO:007023 | T cell apop  | 14/905 | 49/18866  | 4.34E-08 | 3.38E-07 | 1.77E-07 | IDO1/CCL5   |
| BP | GO:000177 | myeloid de   | 11/905 | 29/18866  | 4.55E-08 | 3.52E-07 | 1.85E-07 | RELB/IL10/  |
| BP | GO:003303 | regulation   | 11/905 | 29/18866  | 4.55E-08 | 3.52E-07 | 1.85E-07 | FCER1G/AI   |
| BP | GO:003633 | dendritic c  | 11/905 | 29/18866  | 4.55E-08 | 3.52E-07 | 1.85E-07 | CALR/CCL5   |
| BP | GO:004303 | positive re  | 11/905 | 29/18866  | 4.55E-08 | 3.52E-07 | 1.85E-07 | LBP/WNT5    |

|    |           |              |        |           |          |          |          |            |
|----|-----------|--------------|--------|-----------|----------|----------|----------|------------|
| BP | GO:004600 | regulation   | 13/905 | 42/18866  | 4.56E-08 | 3.53E-07 | 1.85E-07 | AGER/EPO,  |
| BP | GO:003327 | response to  | 19/905 | 91/18866  | 4.94E-08 | 3.81E-07 | 2.00E-07 | CD4/CXCL1  |
| BP | GO:001081 | regulation   | 31/905 | 217/18866 | 5.23E-08 | 4.03E-07 | 2.12E-07 | CALR/MMF   |
| BP | GO:003017 | positive re  | 28/905 | 183/18866 | 5.24E-08 | 4.03E-07 | 2.12E-07 | PSMB8/PSI  |
| BP | GO:199013 | neuron prc   | 27/905 | 172/18866 | 5.24E-08 | 4.03E-07 | 2.12E-07 | HSP90AA1,  |
| BP | GO:004513 | developme    | 32/905 | 229/18866 | 5.43E-08 | 4.17E-07 | 2.19E-07 | HSPA5/ICA  |
| BP | GO:007067 | response to  | 14/905 | 50/18866  | 5.76E-08 | 4.41E-07 | 2.32E-07 | IFNG/PSME  |
| BP | GO:190372 | positive re  | 14/905 | 50/18866  | 5.76E-08 | 4.41E-07 | 2.32E-07 | TGFB1/FAE  |
| BP | GO:004574 | positive re  | 12/905 | 36/18866  | 5.95E-08 | 4.54E-07 | 2.39E-07 | MMP9/FAS   |
| BP | GO:190520 | regulation   | 16/905 | 66/18866  | 6.16E-08 | 4.70E-07 | 2.47E-07 | TGFB1/SEN  |
| BP | GO:003051 | negative re  | 13/905 | 43/18866  | 6.26E-08 | 4.77E-07 | 2.50E-07 | WNT5A/SE   |
| BP | GO:000247 | antigen prc  | 8/905  | 14/18866  | 6.31E-08 | 4.80E-07 | 2.52E-07 | AZGP1/B2M  |
| BP | GO:000271 | negative re  | 10/905 | 24/18866  | 6.52E-08 | 4.95E-07 | 2.60E-07 | HLA-F/XCL  |
| BP | GO:004873 | cardiac mu   | 32/905 | 231/18866 | 6.68E-08 | 5.07E-07 | 2.66E-07 | CALR/TGFE  |
| BP | GO:001072 | negative re  | 41/905 | 343/18866 | 7.11E-08 | 5.38E-07 | 2.83E-07 | B2M/CALR,  |
| BP | GO:200011 | negative re  | 19/905 | 93/18866  | 7.15E-08 | 5.41E-07 | 2.84E-07 | MMP9/LTF   |
| BP | GO:004327 | apoptotic c  | 14/905 | 51/18866  | 7.60E-08 | 5.74E-07 | 3.02E-07 | ITGAV/CCL  |
| BP | GO:001075 | positive re  | 9/905  | 19/18866  | 7.73E-08 | 5.80E-07 | 3.05E-07 | CCL5/MAP1  |
| BP | GO:004824 | eosinophil   | 9/905  | 19/18866  | 7.73E-08 | 5.80E-07 | 3.05E-07 | CCL13/CCL  |
| BP | GO:007023 | negative re  | 9/905  | 19/18866  | 7.73E-08 | 5.80E-07 | 3.05E-07 | IDO1/CCL5  |
| BP | GO:009854 | detection c  | 9/905  | 19/18866  | 7.73E-08 | 5.80E-07 | 3.05E-07 | HLA-A/HLA  |
| BP | GO:015014 | cell junctio | 9/905  | 19/18866  | 7.73E-08 | 5.80E-07 | 3.05E-07 | CX3CR1/DH  |
| BP | GO:004303 | regulation   | 15/905 | 59/18866  | 8.03E-08 | 6.02E-07 | 3.16E-07 | LBP/WNT5   |
| BP | GO:000821 | regulation   | 28/905 | 187/18866 | 8.39E-08 | 6.28E-07 | 3.30E-07 | ERAP1/CTS  |
| BP | GO:004568 | positive re  | 13/905 | 44/18866  | 8.49E-08 | 6.34E-07 | 3.33E-07 | TGFB1/TLR  |
| BP | GO:003010 | regulation   | 30/905 | 210/18866 | 8.57E-08 | 6.39E-07 | 3.36E-07 | B2M/VEGF   |
| BP | GO:190165 | cellular res | 45/905 | 398/18866 | 8.67E-08 | 6.46E-07 | 3.39E-07 | ICAM1/IL11 |
| BP | GO:001657 | protein dei  | 36/905 | 283/18866 | 9.41E-08 | 7.00E-07 | 3.68E-07 | PSMB8/PSI  |
| BP | GO:004875 | branching i  | 25/905 | 155/18866 | 9.46E-08 | 7.03E-07 | 3.69E-07 | TNF/PML/A  |
| BP | GO:000840 | gonad dev    | 31/905 | 223/18866 | 9.87E-08 | 7.32E-07 | 3.85E-07 | HSPA5/ICA  |
| BP | GO:004826 | positive re  | 14/905 | 52/18866  | 9.94E-08 | 7.36E-07 | 3.87E-07 | B2M/VEGF   |
| BP | GO:000282 | regulation   | 11/905 | 31/18866  | 1.02E-07 | 7.52E-07 | 3.95E-07 | XCL1/IFNL1 |
| BP | GO:190262 | positive re  | 11/905 | 31/18866  | 1.02E-07 | 7.52E-07 | 3.95E-07 | CXCL8/XCL  |
| BP | GO:200040 | positive re  | 11/905 | 31/18866  | 1.02E-07 | 7.52E-07 | 3.95E-07 | CXCL10/CX  |
| BP | GO:190342 | positive re  | 15/905 | 60/18866  | 1.02E-07 | 7.54E-07 | 3.97E-07 | HSP90AA1,  |
| BP | GO:003109 | regeneratio  | 29/905 | 201/18866 | 1.13E-07 | 8.30E-07 | 4.36E-07 | CXCL12/AP  |
| BP | GO:001400 | astrocyte d  | 13/905 | 45/18866  | 1.14E-07 | 8.39E-07 | 4.41E-07 | IFNG/S100. |
| BP | GO:190118 | positive re  | 12/905 | 38/18866  | 1.18E-07 | 8.63E-07 | 4.54E-07 | MMP9/FAS   |
| BP | GO:003033 | negative re  | 41/905 | 350/18866 | 1.24E-07 | 9.10E-07 | 4.78E-07 | CALR/CXCL  |
| BP | GO:005178 | positive re  | 18/905 | 87/18866  | 1.29E-07 | 9.39E-07 | 4.94E-07 | TGFB1/IL1E |
| BP | GO:006021 | hematopoi    | 18/905 | 87/18866  | 1.29E-07 | 9.39E-07 | 4.94E-07 | PSMB8/PSI  |
| BP | GO:004333 | response to  | 14/905 | 53/18866  | 1.29E-07 | 9.41E-07 | 4.95E-07 | DDX58/IRF  |
| BP | GO:004559 | negative re  | 14/905 | 53/18866  | 1.29E-07 | 9.41E-07 | 4.95E-07 | TGFB1/TNF  |
| BP | GO:002303 | CD40 signa   | 8/905  | 15/18866  | 1.30E-07 | 9.43E-07 | 4.95E-07 | CD40/TNF/A |
| BP | GO:005138 | response to  | 24/905 | 147/18866 | 1.34E-07 | 9.76E-07 | 5.13E-07 | ICAM1/S1C  |
| BP | GO:190382 | positive re  | 40/905 | 338/18866 | 1.34E-07 | 9.76E-07 | 5.13E-07 | FCER1G/H   |
| BP | GO:000241 | immune re    | 9/905  | 20/18866  | 1.35E-07 | 9.76E-07 | 5.13E-07 | HLA-A/MR:  |
| BP | GO:007064 | protein mo   | 37/905 | 300/18866 | 1.39E-07 | 1.01E-06 | 5.29E-07 | PSMB8/PSI  |
| BP | GO:200014 | negative re  | 42/905 | 365/18866 | 1.44E-07 | 1.04E-06 | 5.46E-07 | CALR/CXCL  |
| BP | GO:012016 | positive re  | 19/905 | 97/18866  | 1.45E-07 | 1.04E-06 | 5.49E-07 | LCN2/FABF  |

|    |           |              |        |           |          |          |          |            |
|----|-----------|--------------|--------|-----------|----------|----------|----------|------------|
| BP | GO:190118 | regulation   | 19/905 | 97/18866  | 1.45E-07 | 1.04E-06 | 5.49E-07 | MMP9/FAS   |
| BP | GO:003267 | regulation   | 11/905 | 32/18866  | 1.49E-07 | 1.07E-06 | 5.60E-07 | FCER1G/CI  |
| BP | GO:003812 | ERBB2 sign   | 11/905 | 32/18866  | 1.49E-07 | 1.07E-06 | 5.60E-07 | HSP90AA1,  |
| BP | GO:004558 | regulation   | 11/905 | 32/18866  | 1.49E-07 | 1.07E-06 | 5.60E-07 | HLA-G/IFN  |
| BP | GO:007135 | cellular res | 11/905 | 32/18866  | 1.49E-07 | 1.07E-06 | 5.60E-07 | HSPA5/HSF  |
| BP | GO:004333 | response to  | 13/905 | 46/18866  | 1.52E-07 | 1.09E-06 | 5.73E-07 | DDX58/IRF  |
| BP | GO:190547 | positive re  | 22/905 | 127/18866 | 1.53E-07 | 1.09E-06 | 5.74E-07 | IFNG/TNF/  |
| BP | GO:005134 | regulation   | 21/905 | 117/18866 | 1.56E-07 | 1.12E-06 | 5.86E-07 | HSP90AA1,  |
| BP | GO:003165 | positive re  | 7/905  | 11/18866  | 1.59E-07 | 1.13E-06 | 5.95E-07 | IL1B/TNF/T |
| BP | GO:007075 | interleukin  | 7/905  | 11/18866  | 1.59E-07 | 1.13E-06 | 5.95E-07 | STAT1/EBI  |
| BP | GO:009888 | synapse pr   | 7/905  | 11/18866  | 1.59E-07 | 1.13E-06 | 5.95E-07 | CX3CR1/DH  |
| BP | GO:003274 | positive re  | 10/905 | 26/18866  | 1.62E-07 | 1.15E-06 | 6.03E-07 | CD4/IL1B/I |
| BP | GO:004210 | positive re  | 10/905 | 26/18866  | 1.62E-07 | 1.15E-06 | 6.03E-07 | AGER/EPO,  |
| BP | GO:000229 | CD4-positi   | 15/905 | 62/18866  | 1.64E-07 | 1.16E-06 | 6.10E-07 | IFNG/RELB, |
| BP | GO:003031 | osteoclast   | 19/905 | 98/18866  | 1.72E-07 | 1.22E-06 | 6.39E-07 | FCER1G/IFI |
| BP | GO:190595 | regulation   | 26/905 | 171/18866 | 1.77E-07 | 1.25E-06 | 6.58E-07 | IL1B/FABP  |
| BP | GO:004343 | negative re  | 27/905 | 183/18866 | 1.94E-07 | 1.37E-06 | 7.18E-07 | PSMD10/X   |
| BP | GO:000224 | hematopoi    | 26/905 | 172/18866 | 1.99E-07 | 1.41E-06 | 7.39E-07 | PSMB8/PSI  |
| BP | GO:002260 | ovulation c  | 13/905 | 47/18866  | 2.01E-07 | 1.42E-06 | 7.45E-07 | HSPA5/SRC  |
| BP | GO:000228 | alpha-beta   | 15/905 | 63/18866  | 2.05E-07 | 1.44E-06 | 7.58E-07 | IFNG/RELB, |
| BP | GO:000229 | alpha-beta   | 15/905 | 63/18866  | 2.05E-07 | 1.44E-06 | 7.58E-07 | IFNG/RELB, |
| BP | GO:007200 | renal syste  | 36/905 | 292/18866 | 2.07E-07 | 1.45E-06 | 7.63E-07 | MMP9/RBI   |
| BP | GO:004664 | regulation   | 11/905 | 33/18866  | 2.13E-07 | 1.49E-06 | 7.84E-07 | HLA-A/XCL  |
| BP | GO:009002 | regulation   | 11/905 | 33/18866  | 2.13E-07 | 1.49E-06 | 7.84E-07 | CXCL8/XCL  |
| BP | GO:006056 | epithelial t | 39/905 | 331/18866 | 2.16E-07 | 1.51E-06 | 7.94E-07 | CXCL10/TG  |
| BP | GO:014035 | lipid export | 12/905 | 40/18866  | 2.22E-07 | 1.55E-06 | 8.15E-07 | IL1B/TNFSF |
| BP | GO:004814 | astrocyte a  | 10/905 | 27/18866  | 2.46E-07 | 1.71E-06 | 9.00E-07 | IFNG/IL1B/ |
| BP | GO:000252 | leukocyte r  | 8/905  | 16/18866  | 2.48E-07 | 1.73E-06 | 9.08E-07 | S100A9/S1  |
| BP | GO:005109 | positive re  | 26/905 | 174/18866 | 2.52E-07 | 1.75E-06 | 9.20E-07 | B2M/HSP9   |
| BP | GO:004663 | regulation   | 15/905 | 64/18866  | 2.57E-07 | 1.78E-06 | 9.35E-07 | IFNG/SOCS  |
| BP | GO:006013 | maternal p   | 15/905 | 64/18866  | 2.57E-07 | 1.78E-06 | 9.35E-07 | CTSB/MAP   |
| BP | GO:001491 | positive re  | 13/905 | 48/18866  | 2.64E-07 | 1.83E-06 | 9.60E-07 | NOX4/CCL   |
| BP | GO:004337 | regulation   | 13/905 | 48/18866  | 2.64E-07 | 1.83E-06 | 9.60E-07 | IFNG/SOCS  |
| BP | GO:006068 | regulation   | 14/905 | 56/18866  | 2.73E-07 | 1.88E-06 | 9.90E-07 | TNF/VEGF/  |
| BP | GO:001052 | regulation   | 19/905 | 101/18866 | 2.82E-07 | 1.95E-06 | 1.02E-06 | CD4/CXCL1  |
| BP | GO:005068 | negative re  | 26/905 | 175/18866 | 2.83E-07 | 1.95E-06 | 1.02E-06 | B2M/TGFB   |
| BP | GO:003087 | mammary      | 23/905 | 142/18866 | 2.83E-07 | 1.95E-06 | 1.02E-06 | PML/VEGF,  |
| BP | GO:005134 | negative re  | 36/905 | 296/18866 | 2.90E-07 | 1.99E-06 | 1.05E-06 | IFNG/IL1B/ |
| BP | GO:190204 | negative re  | 12/905 | 41/18866  | 3.00E-07 | 2.06E-06 | 1.08E-06 | ICAM1/TNI  |
| BP | GO:003281 | regulation   | 11/905 | 34/18866  | 3.02E-07 | 2.07E-06 | 1.09E-06 | HLA-F/MIC  |
| BP | GO:003529 | regulation   | 23/905 | 143/18866 | 3.22E-07 | 2.20E-06 | 1.16E-06 | ICAM1/F2F  |
| BP | GO:004559 | regulation   | 23/905 | 143/18866 | 3.22E-07 | 2.20E-06 | 1.16E-06 | TGFB1/TNF  |
| BP | GO:009774 | regulation   | 23/905 | 143/18866 | 3.22E-07 | 2.20E-06 | 1.16E-06 | ICAM1/F2F  |
| BP | GO:000268 | negative re  | 13/905 | 49/18866  | 3.44E-07 | 2.34E-06 | 1.23E-06 | CXCL12/AP  |
| BP | GO:004505 | T cell selec | 13/905 | 49/18866  | 3.44E-07 | 2.34E-06 | 1.23E-06 | CD4/CTSL/  |
| BP | GO:007134 | cellular res | 13/905 | 49/18866  | 3.44E-07 | 2.34E-06 | 1.23E-06 | IFNG/PSME  |
| BP | GO:005105 | positive re  | 28/905 | 200/18866 | 3.51E-07 | 2.39E-06 | 1.25E-06 | HSP90AA1,  |
| BP | GO:000255 | mast cell cl | 7/905  | 12/18866  | 3.66E-07 | 2.47E-06 | 1.30E-06 | VEGFA/CCL  |
| BP | GO:003249 | detection c  | 7/905  | 12/18866  | 3.66E-07 | 2.47E-06 | 1.30E-06 | TLR2/LBP/I |
| BP | GO:003811 | interleukin  | 7/905  | 12/18866  | 3.66E-07 | 2.47E-06 | 1.30E-06 | PTK2B/IL2F |



|    |                         |        |           |          |          |          |            |
|----|-------------------------|--------|-----------|----------|----------|----------|------------|
| BP | GO:190353 negative re   | 25/905 | 166/18866 | 3.66E-07 | 2.47E-06 | 1.30E-06 | HLA-F/IL1B |
| BP | GO:003515 regulation    | 23/905 | 144/18866 | 3.67E-07 | 2.47E-06 | 1.30E-06 | ICAM1/F2F  |
| BP | GO:010610 cold-induc    | 23/905 | 144/18866 | 3.67E-07 | 2.47E-06 | 1.30E-06 | LCN2/FABF  |
| BP | GO:012016 regulation    | 23/905 | 144/18866 | 3.67E-07 | 2.47E-06 | 1.30E-06 | LCN2/FABF  |
| BP | GO:000185 tissue hom    | 33/905 | 261/18866 | 3.69E-07 | 2.49E-06 | 1.31E-06 | AZGP1/B2M  |
| BP | GO:199084 adaptive tr   | 24/905 | 155/18866 | 3.71E-07 | 2.49E-06 | 1.31E-06 | LCN2/FABF  |
| BP | GO:003297 regulation    | 44/905 | 405/18866 | 3.73E-07 | 2.50E-06 | 1.32E-06 | ICAM1/CXC  |
| BP | GO:000636 transcriptic  | 27/905 | 189/18866 | 3.76E-07 | 2.52E-06 | 1.32E-06 | PSMC2/PSI  |
| BP | GO:004668 response tr   | 22/905 | 134/18866 | 4.02E-07 | 2.69E-06 | 1.41E-06 | HSPA5/IL1I |
| BP | GO:190262 regulation    | 12/905 | 42/18866  | 4.02E-07 | 2.69E-06 | 1.41E-06 | CXCL8/XCL  |
| BP | GO:003110 animal org    | 16/905 | 75/18866  | 4.11E-07 | 2.74E-06 | 1.44E-06 | CXCL12/IL1 |
| BP | GO:000836 regulation    | 24/905 | 156/18866 | 4.19E-07 | 2.79E-06 | 1.47E-06 | ICAM1/CCL  |
| BP | GO:000743 salivary gla  | 11/905 | 35/18866  | 4.21E-07 | 2.80E-06 | 1.47E-06 | TGFB1/TNF  |
| BP | GO:003263 interleukin   | 11/905 | 35/18866  | 4.21E-07 | 2.80E-06 | 1.47E-06 | FCER1G/CL  |
| BP | GO:004506 regulatory    | 11/905 | 35/18866  | 4.21E-07 | 2.80E-06 | 1.47E-06 | HLA-G/IFN  |
| BP | GO:000276 positive re   | 14/905 | 58/18866  | 4.36E-07 | 2.89E-06 | 1.52E-06 | CD4/IFNG/  |
| BP | GO:005159 response tr   | 18/905 | 94/18866  | 4.38E-07 | 2.90E-06 | 1.52E-06 | HSPA5/NO   |
| BP | GO:190403 regulation    | 18/905 | 94/18866  | 4.38E-07 | 2.90E-06 | 1.52E-06 | HLA-G/ICAI |
| BP | GO:004685 regulation    | 13/905 | 50/18866  | 4.44E-07 | 2.94E-06 | 1.54E-06 | TFRC/TNF   |
| BP | GO:001604 detection c   | 8/905  | 17/18866  | 4.49E-07 | 2.96E-06 | 1.56E-06 | HLA-A/HLA  |
| BP | GO:003269 negative re   | 8/905  | 17/18866  | 4.49E-07 | 2.96E-06 | 1.56E-06 | TLR8/CCR7  |
| BP | GO:001077 positive re   | 24/905 | 157/18866 | 4.72E-07 | 3.11E-06 | 1.64E-06 | CALR/CXCL  |
| BP | GO:004315 negative re   | 17/905 | 85/18866  | 4.78E-07 | 3.14E-06 | 1.65E-06 | MMP9/TNI   |
| BP | GO:004567 regulation    | 15/905 | 67/18866  | 4.86E-07 | 3.19E-06 | 1.68E-06 | IFNG/LTF/T |
| BP | GO:000195 regulation    | 21/905 | 125/18866 | 4.95E-07 | 3.25E-06 | 1.71E-06 | MMP12/PL   |
| BP | GO:003307 T cell differ | 16/905 | 76/18866  | 4.97E-07 | 3.26E-06 | 1.71E-06 | B2M/MR1/   |
| BP | GO:200010 positive re   | 10/905 | 29/18866  | 5.34E-07 | 3.50E-06 | 1.84E-06 | IDO1/CCL5  |
| BP | GO:005070 regulation    | 14/905 | 59/18866  | 5.46E-07 | 3.57E-06 | 1.88E-06 | IFNG/TLR2, |
| BP | GO:000276 negative re   | 13/905 | 51/18866  | 5.70E-07 | 3.72E-06 | 1.96E-06 | LTF/TLR3/A |
| BP | GO:004871 positive re   | 9/905  | 23/18866  | 5.75E-07 | 3.75E-06 | 1.97E-06 | TLR2/HDAC  |
| BP | GO:000189 maternal p    | 11/905 | 36/18866  | 5.80E-07 | 3.77E-06 | 1.98E-06 | CTSB/MAP   |
| BP | GO:003328 response tr   | 11/905 | 36/18866  | 5.80E-07 | 3.77E-06 | 1.98E-06 | CD4/CXCL1  |
| BP | GO:003440 response tr   | 11/905 | 36/18866  | 5.80E-07 | 3.77E-06 | 1.98E-06 | SRC/PTGS2  |
| BP | GO:000275 cytoplasmic   | 15/905 | 68/18866  | 5.96E-07 | 3.87E-06 | 2.03E-06 | DDX58/IRF  |
| BP | GO:007257 endothelia    | 15/905 | 68/18866  | 5.96E-07 | 3.87E-06 | 2.03E-06 | HLA-G/ICAI |
| BP | GO:009009 regulation    | 32/905 | 254/18866 | 6.00E-07 | 3.89E-06 | 2.04E-06 | HSPA5/HSF  |
| BP | GO:003209 negative re   | 19/905 | 106/18866 | 6.17E-07 | 3.99E-06 | 2.10E-06 | B2M/SLPI/  |
| BP | GO:004209 T-helper ce   | 14/905 | 60/18866  | 6.81E-07 | 4.40E-06 | 2.31E-06 | RELB/IL27/ |
| BP | GO:003262 interleukin   | 12/905 | 44/18866  | 7.02E-07 | 4.53E-06 | 2.38E-06 | MR1/IFNG,  |
| BP | GO:190547 regulation    | 27/905 | 195/18866 | 7.08E-07 | 4.56E-06 | 2.40E-06 | IFNG/TGFB  |
| BP | GO:003295 regulation    | 40/905 | 360/18866 | 7.09E-07 | 4.57E-06 | 2.40E-06 | ICAM1/CXC  |
| BP | GO:004689 regulation    | 28/905 | 207/18866 | 7.17E-07 | 4.61E-06 | 2.42E-06 | IFNG/NFYA  |
| BP | GO:005105 positive re   | 16/905 | 78/18866  | 7.21E-07 | 4.63E-06 | 2.44E-06 | F2R/F2RL1, |
| BP | GO:003572 interleukin   | 7/905  | 13/18866  | 7.60E-07 | 4.85E-06 | 2.55E-06 | CD4/IL15/I |
| BP | GO:006034 positive re   | 7/905  | 13/18866  | 7.60E-07 | 4.85E-06 | 2.55E-06 | MMP12/IR   |
| BP | GO:007135 cellular res  | 7/905  | 13/18866  | 7.60E-07 | 4.85E-06 | 2.55E-06 | CD4/IL15/I |
| BP | GO:007135 cellular res  | 7/905  | 13/18866  | 7.60E-07 | 4.85E-06 | 2.55E-06 | PTK2B/IL2F |
| BP | GO:009753 mast cell r   | 7/905  | 13/18866  | 7.60E-07 | 4.85E-06 | 2.55E-06 | VEGFA/CCL  |
| BP | GO:190228 semaphorin    | 7/905  | 13/18866  | 7.60E-07 | 4.85E-06 | 2.55E-06 | SEMA3A/P   |
| BP | GO:009009 negative re   | 26/905 | 184/18866 | 7.62E-07 | 4.86E-06 | 2.55E-06 | PSMB8/PSI  |

|    |           |              |        |           |          |          |          |            |
|----|-----------|--------------|--------|-----------|----------|----------|----------|------------|
| BP | GO:006082 | regulation   | 35/905 | 295/18866 | 7.64E-07 | 4.86E-06 | 2.55E-06 | PSMB8/PSI  |
| BP | GO:009026 | positive re  | 23/905 | 150/18866 | 7.71E-07 | 4.90E-06 | 2.58E-06 | PSMB8/PSI  |
| BP | GO:004573 | respiratory  | 11/905 | 37/18866  | 7.90E-07 | 5.00E-06 | 2.63E-06 | LBP/CYBB/  |
| BP | GO:006220 | positive re  | 11/905 | 37/18866  | 7.90E-07 | 5.00E-06 | 2.63E-06 | TLR2/LBP/I |
| BP | GO:007154 | dopaminer    | 11/905 | 37/18866  | 7.90E-07 | 5.00E-06 | 2.63E-06 | VEGFA/WN   |
| BP | GO:003286 | response tr  | 34/905 | 283/18866 | 8.21E-07 | 5.19E-06 | 2.73E-06 | ICAM1/TLR  |
| BP | GO:000926 | response tr  | 30/905 | 233/18866 | 8.45E-07 | 5.34E-06 | 2.80E-06 | HSPA2/HSF  |
| BP | GO:190204 | regulation   | 14/905 | 61/18866  | 8.45E-07 | 5.34E-06 | 2.80E-06 | ICAM1/TNI  |
| BP | GO:007155 | response tr  | 32/905 | 258/18866 | 8.51E-07 | 5.36E-06 | 2.82E-06 | HSPA5/HSF  |
| BP | GO:004353 | positive re  | 16/905 | 79/18866  | 8.65E-07 | 5.44E-06 | 2.86E-06 | TMSB4X/TI  |
| BP | GO:000175 | organ indu   | 9/905  | 24/18866  | 8.81E-07 | 5.52E-06 | 2.90E-06 | WNT5A/FC   |
| BP | GO:003275 | positive re  | 9/905  | 24/18866  | 8.81E-07 | 5.52E-06 | 2.90E-06 | FCER1G/CI  |
| BP | GO:003412 | positive re  | 9/905  | 24/18866  | 8.81E-07 | 5.52E-06 | 2.90E-06 | TLR2/LBP/I |
| BP | GO:005077 | negative re  | 15/905 | 70/18866  | 8.86E-07 | 5.55E-06 | 2.92E-06 | WNT5A/PT   |
| BP | GO:005237 | modulator    | 12/905 | 45/18866  | 9.16E-07 | 5.73E-06 | 3.01E-06 | CD4/CXCL8  |
| BP | GO:003476 | positive re  | 28/905 | 210/18866 | 9.62E-07 | 6.01E-06 | 3.16E-06 | HSPA2/IFN  |
| BP | GO:005105 | regulation   | 40/905 | 365/18866 | 1.01E-06 | 6.31E-06 | 3.32E-06 | HSP90AA1,  |
| BP | GO:001051 | positive re  | 14/905 | 62/18866  | 1.04E-06 | 6.51E-06 | 3.42E-06 | CCL5/PDGF  |
| BP | GO:200035 | regulation   | 14/905 | 62/18866  | 1.04E-06 | 6.51E-06 | 3.42E-06 | HLA-G/ICAI |
| BP | GO:003135 | regulation   | 28/905 | 211/18866 | 1.06E-06 | 6.59E-06 | 3.46E-06 | HSPA5/HSF  |
| BP | GO:007022 | negative re  | 10/905 | 31/18866  | 1.08E-06 | 6.74E-06 | 3.54E-06 | IDO1/CCL5  |
| BP | GO:007030 | cellular res | 18/905 | 100/18866 | 1.14E-06 | 7.06E-06 | 3.71E-06 | LCN2/TNFA  |
| BP | GO:001086 | positive re  | 12/905 | 46/18866  | 1.19E-06 | 7.35E-06 | 3.86E-06 | PDGFRB/CI  |
| BP | GO:003323 | regulation   | 16/905 | 81/18866  | 1.23E-06 | 7.63E-06 | 4.01E-06 | PSMB8/PSI  |
| BP | GO:000271 | negative re  | 8/905  | 19/18866  | 1.28E-06 | 7.92E-06 | 4.16E-06 | HLA-F/HLA  |
| BP | GO:009002 | positive re  | 8/905  | 19/18866  | 1.28E-06 | 7.92E-06 | 4.16E-06 | CXCL10/CX  |
| BP | GO:004353 | blood vess   | 26/905 | 189/18866 | 1.28E-06 | 7.92E-06 | 4.16E-06 | TMSB4X/TI  |
| BP | GO:006103 | regulation   | 15/905 | 72/18866  | 1.30E-06 | 8.00E-06 | 4.21E-06 | WNT5A/BN   |
| BP | GO:006033 | regulation   | 9/905  | 25/18866  | 1.32E-06 | 8.11E-06 | 4.26E-06 | HSP90AB1,  |
| BP | GO:006033 | regulation   | 9/905  | 25/18866  | 1.32E-06 | 8.11E-06 | 4.26E-06 | HSP90AB1,  |
| BP | GO:003050 | BMP signal   | 23/905 | 155/18866 | 1.39E-06 | 8.52E-06 | 4.48E-06 | TGFB1/HJV  |
| BP | GO:000743 | salivary gla | 11/905 | 39/18866  | 1.42E-06 | 8.70E-06 | 4.57E-06 | TGFB1/TNF  |
| BP | GO:005135 | positive re  | 13/905 | 55/18866  | 1.45E-06 | 8.89E-06 | 4.67E-06 | IFNG/S100. |
| BP | GO:001093 | regulation   | 7/905  | 14/18866  | 1.46E-06 | 8.89E-06 | 4.67E-06 | HLA-G/TGF  |
| BP | GO:003231 | prostaglan   | 7/905  | 14/18866  | 1.46E-06 | 8.89E-06 | 4.67E-06 | IL1B/TNFSF |
| BP | GO:003268 | negative re  | 7/905  | 14/18866  | 1.46E-06 | 8.89E-06 | 4.67E-06 | RELB/NLRX  |
| BP | GO:007066 | response tr  | 7/905  | 14/18866  | 1.46E-06 | 8.89E-06 | 4.67E-06 | PTK2B/IL2F |
| BP | GO:007067 | response tr  | 7/905  | 14/18866  | 1.46E-06 | 8.89E-06 | 4.67E-06 | CD4/IL15/I |
| BP | GO:007156 | cellular res | 31/905 | 252/18866 | 1.50E-06 | 9.14E-06 | 4.81E-06 | HSPA5/HSF  |
| BP | GO:003469 | response tr  | 10/905 | 32/18866  | 1.51E-06 | 9.16E-06 | 4.81E-06 | TNFSF4/CC  |
| BP | GO:003545 | response tr  | 10/905 | 32/18866  | 1.51E-06 | 9.16E-06 | 4.81E-06 | TLR3/STAT  |
| BP | GO:006103 | positive re  | 10/905 | 32/18866  | 1.51E-06 | 9.16E-06 | 4.81E-06 | WNT5A/BN   |
| BP | GO:003572 | interleukin  | 12/905 | 47/18866  | 1.52E-06 | 9.22E-06 | 4.85E-06 | IFNG/PSME  |
| BP | GO:004663 | positive re  | 12/905 | 47/18866  | 1.52E-06 | 9.22E-06 | 4.85E-06 | IFNG/SOCS  |
| BP | GO:001051 | regulation   | 15/905 | 73/18866  | 1.56E-06 | 9.45E-06 | 4.96E-06 | CCL5/PDGF  |
| BP | GO:004545 | bone resor   | 14/905 | 64/18866  | 1.57E-06 | 9.50E-06 | 4.99E-06 | NOX4/TFR   |
| BP | GO:005196 | negative re  | 36/905 | 319/18866 | 1.76E-06 | 1.06E-05 | 5.59E-06 | B2M/CALR,  |
| BP | GO:004518 | maintenan    | 17/905 | 93/18866  | 1.80E-06 | 1.08E-05 | 5.70E-06 | CD4/HSPA5  |
| BP | GO:009018 | regulation   | 13/905 | 56/18866  | 1.81E-06 | 1.09E-05 | 5.73E-06 | MMP9/ADI   |
| BP | GO:190464 | response tr  | 13/905 | 56/18866  | 1.81E-06 | 1.09E-05 | 5.73E-06 | ICAM1/MN   |

|    |           |               |        |           |          |          |          |            |
|----|-----------|---------------|--------|-----------|----------|----------|----------|------------|
| BP | GO:000271 | positive re   | 11/905 | 40/18866  | 1.87E-06 | 1.12E-05 | 5.89E-06 | FCER1G/LT  |
| BP | GO:000285 | positive re   | 11/905 | 40/18866  | 1.87E-06 | 1.12E-05 | 5.89E-06 | FCER1G/LT  |
| BP | GO:003414 | toll-like rec | 11/905 | 40/18866  | 1.87E-06 | 1.12E-05 | 5.89E-06 | S100A14/L  |
| BP | GO:009018 | positive re   | 11/905 | 40/18866  | 1.87E-06 | 1.12E-05 | 5.89E-06 | ADIPOQ/VI  |
| BP | GO:190332 | regulation    | 30/905 | 242/18866 | 1.88E-06 | 1.12E-05 | 5.91E-06 | HSPA5/HSF  |
| BP | GO:003164 | killing of ce | 14/905 | 65/18866  | 1.92E-06 | 1.14E-05 | 6.02E-06 | IFNG/CCL1  |
| BP | GO:000234 | response tr   | 9/905  | 26/18866  | 1.93E-06 | 1.15E-05 | 6.05E-06 | HLA-A/MR   |
| BP | GO:000250 | tolerance in  | 9/905  | 26/18866  | 1.93E-06 | 1.15E-05 | 6.05E-06 | HLA-B/HLA  |
| BP | GO:190027 | regulation    | 12/905 | 48/18866  | 1.94E-06 | 1.16E-05 | 6.08E-06 | PDGFRB/CI  |
| BP | GO:003367 | negative re   | 32/905 | 268/18866 | 1.96E-06 | 1.17E-05 | 6.14E-06 | IFNG/IL1B/ |
| BP | GO:003011 | regulation    | 40/905 | 375/18866 | 2.00E-06 | 1.19E-05 | 6.25E-06 | PSMB8/PSI  |
| BP | GO:000272 | positive re   | 8/905  | 20/18866  | 2.05E-06 | 1.21E-05 | 6.35E-06 | B2M/HLA-D  |
| BP | GO:003413 | toll-like rec | 8/905  | 20/18866  | 2.05E-06 | 1.21E-05 | 6.35E-06 | TLR3/TNFA  |
| BP | GO:005176 | nitric-oxide  | 8/905  | 20/18866  | 2.05E-06 | 1.21E-05 | 6.35E-06 | IFNG/TLR2, |
| BP | GO:005176 | regulation    | 8/905  | 20/18866  | 2.05E-06 | 1.21E-05 | 6.35E-06 | IFNG/TLR2, |
| BP | GO:005088 | endocrine     | 16/905 | 84/18866  | 2.05E-06 | 1.21E-05 | 6.35E-06 | IL1B/CTSG, |
| BP | GO:000720 | phospholip    | 18/905 | 104/18866 | 2.06E-06 | 1.21E-05 | 6.38E-06 | F2R/F2RL1, |
| BP | GO:000269 | regulation    | 10/905 | 33/18866  | 2.07E-06 | 1.22E-05 | 6.42E-06 | ICAM1/CXC  |
| BP | GO:007138 | cellular res  | 27/905 | 206/18866 | 2.09E-06 | 1.23E-05 | 6.48E-06 | CALR/ICAM  |
| BP | GO:190595 | positive re   | 17/905 | 94/18866  | 2.10E-06 | 1.24E-05 | 6.49E-06 | IL1B/FABP3 |
| BP | GO:005076 | negative re   | 34/905 | 295/18866 | 2.12E-06 | 1.25E-05 | 6.55E-06 | B2M/CALR   |
| BP | GO:000267 | regulation    | 6/905  | 10/18866  | 2.13E-06 | 1.25E-05 | 6.57E-06 | LTA/TNF/IL |
| BP | GO:003230 | positive re   | 6/905  | 10/18866  | 2.13E-06 | 1.25E-05 | 6.57E-06 | IL1B/TNFSF |
| BP | GO:000164 | osteoblast    | 29/905 | 231/18866 | 2.15E-06 | 1.26E-05 | 6.63E-06 | PSMC2/LTF  |
| BP | GO:004568 | regulation    | 15/905 | 75/18866  | 2.24E-06 | 1.31E-05 | 6.89E-06 | TGFB1/TLR  |
| BP | GO:000154 | ovarian foll  | 13/905 | 57/18866  | 2.24E-06 | 1.31E-05 | 6.89E-06 | ICAM1/VEG  |
| BP | GO:003007 | peptide ho    | 31/905 | 257/18866 | 2.28E-06 | 1.33E-05 | 7.01E-06 | IFNG/IL1B/ |
| BP | GO:000182 | kidney dev    | 33/905 | 283/18866 | 2.31E-06 | 1.35E-05 | 7.08E-06 | MMP9/ADI   |
| BP | GO:005500 | cardiac mu    | 20/905 | 126/18866 | 2.31E-06 | 1.35E-05 | 7.08E-06 | CALR/TGFE  |
| BP | GO:004654 | developme     | 18/905 | 105/18866 | 2.37E-06 | 1.38E-05 | 7.26E-06 | HSPA5/ICA  |
| BP | GO:004563 | negative re   | 17/905 | 95/18866  | 2.44E-06 | 1.42E-05 | 7.46E-06 | LTF/TLR3/A |
| BP | GO:003089 | positive re   | 11/905 | 41/18866  | 2.45E-06 | 1.42E-05 | 7.46E-06 | TFRC/CD40  |
| BP | GO:190520 | positive re   | 11/905 | 41/18866  | 2.45E-06 | 1.42E-05 | 7.46E-06 | TGFB1/SEN  |
| BP | GO:003413 | toll-like rec | 7/905  | 15/18866  | 2.62E-06 | 1.52E-05 | 7.97E-06 | TLR2/TNFA  |
| BP | GO:009059 | inflammat     | 7/905  | 15/18866  | 2.62E-06 | 1.52E-05 | 7.97E-06 | TGFB1/F2R  |
| BP | GO:000646 | negative re   | 30/905 | 246/18866 | 2.64E-06 | 1.53E-05 | 8.03E-06 | IFNG/IL1B/ |
| BP | GO:003476 | positive re   | 23/905 | 161/18866 | 2.70E-06 | 1.56E-05 | 8.21E-06 | HSPA2/IFN  |
| BP | GO:001003 | response tr   | 39/905 | 366/18866 | 2.75E-06 | 1.59E-05 | 8.33E-06 | B2M/CALR   |
| BP | GO:000756 | embryo im     | 13/905 | 58/18866  | 2.77E-06 | 1.59E-05 | 8.38E-06 | CALR/MMF   |
| BP | GO:006007 | canonical v   | 37/905 | 339/18866 | 2.81E-06 | 1.62E-05 | 8.52E-06 | PSMB8/PSI  |
| BP | GO:005121 | cartilage d   | 26/905 | 197/18866 | 2.82E-06 | 1.62E-05 | 8.54E-06 | TGFB1/MA   |
| BP | GO:000177 | leukocyte     | 16/905 | 86/18866  | 2.83E-06 | 1.63E-05 | 8.55E-06 | FCER1G/TM  |
| BP | GO:004308 | regulation    | 47/905 | 481/18866 | 3.08E-06 | 1.77E-05 | 9.30E-06 | ICAM1/CXC  |
| BP | GO:004564 | regulation    | 12/905 | 50/18866  | 3.10E-06 | 1.78E-05 | 9.33E-06 | B2M/STAT3  |
| BP | GO:009730 | programm      | 12/905 | 50/18866  | 3.10E-06 | 1.78E-05 | 9.33E-06 | IRF3/TNF/1 |
| BP | GO:004664 | positive re   | 8/905  | 21/18866  | 3.16E-06 | 1.81E-05 | 9.50E-06 | HLA-A/XCL  |
| BP | GO:009028 | positive re   | 8/905  | 21/18866  | 3.16E-06 | 1.81E-05 | 9.50E-06 | CXCL12/PD  |
| BP | GO:009027 | regulation    | 11/905 | 42/18866  | 3.17E-06 | 1.81E-05 | 9.50E-06 | CXCL12/TR  |
| BP | GO:009876 | response tr   | 11/905 | 42/18866  | 3.17E-06 | 1.81E-05 | 9.50E-06 | PDIA3/SOC  |
| BP | GO:009876 | cellular res  | 11/905 | 42/18866  | 3.17E-06 | 1.81E-05 | 9.50E-06 | PDIA3/SOC  |

|    |           |               |        |           |          |          |          |            |
|----|-----------|---------------|--------|-----------|----------|----------|----------|------------|
| BP | GO:190470 | regulation    | 16/905 | 87/18866  | 3.31E-06 | 1.89E-05 | 9.91E-06 | MMP9/TNF   |
| BP | GO:199087 | vascular as   | 16/905 | 87/18866  | 3.31E-06 | 1.89E-05 | 9.91E-06 | MMP9/TNF   |
| BP | GO:003410 | erythrocyt    | 20/905 | 129/18866 | 3.36E-06 | 1.91E-05 | 1.00E-05 | B2M/STAT   |
| BP | GO:001973 | antibacteri   | 13/905 | 59/18866  | 3.39E-06 | 1.92E-05 | 1.01E-05 | HLA-A/SLPI |
| BP | GO:004800 | platelet-de   | 13/905 | 59/18866  | 3.39E-06 | 1.92E-05 | 1.01E-05 | APOD/ADIF  |
| BP | GO:001993 | cyclic-nucl   | 28/905 | 224/18866 | 3.49E-06 | 1.98E-05 | 1.04E-05 | CXCL10/CX  |
| BP | GO:000718 | G protein-c   | 31/905 | 263/18866 | 3.71E-06 | 2.10E-05 | 1.10E-05 | CXCL10/CX  |
| BP | GO:007137 | cellular res  | 36/905 | 330/18866 | 3.87E-06 | 2.18E-05 | 1.15E-05 | IL1B/ADIPC |
| BP | GO:003280 | receptor bi   | 9/905  | 28/18866  | 3.91E-06 | 2.21E-05 | 1.16E-05 | IFNG/TNF/  |
| BP | GO:015007 | regulation    | 11/905 | 43/18866  | 4.08E-06 | 2.30E-05 | 1.21E-05 | MMP9/IL1   |
| BP | GO:009775 | positive re   | 13/905 | 60/18866  | 4.14E-06 | 2.33E-05 | 1.23E-05 | F2RL1/NOS  |
| BP | GO:000320 | cardiac cha   | 20/905 | 131/18866 | 4.28E-06 | 2.40E-05 | 1.26E-05 | TGFB1/RBF  |
| BP | GO:004688 | positive re   | 20/905 | 131/18866 | 4.28E-06 | 2.40E-05 | 1.26E-05 | RBP4/TFR2  |
| BP | GO:001093 | macrophag     | 7/905  | 16/18866  | 4.46E-06 | 2.50E-05 | 1.31E-05 | HLA-G/TGF  |
| BP | GO:003303 | negative re   | 7/905  | 16/18866  | 4.46E-06 | 2.50E-05 | 1.31E-05 | FCER1G/CC  |
| BP | GO:005177 | positive re   | 7/905  | 16/18866  | 4.46E-06 | 2.50E-05 | 1.31E-05 | IFNG/TLR2  |
| BP | GO:003230 | regulation    | 6/905  | 11/18866  | 4.50E-06 | 2.52E-05 | 1.32E-05 | IL1B/TNFSF |
| BP | GO:007010 | interleukin   | 6/905  | 11/18866  | 4.50E-06 | 2.52E-05 | 1.32E-05 | STAT1/IL27 |
| BP | GO:004350 | regulation    | 16/905 | 89/18866  | 4.52E-06 | 2.52E-05 | 1.33E-05 | TNF/WNT5   |
| BP | GO:200124 | regulation    | 23/905 | 166/18866 | 4.58E-06 | 2.56E-05 | 1.34E-05 | CXCL12/S1  |
| BP | GO:009010 | positive re   | 18/905 | 110/18866 | 4.71E-06 | 2.63E-05 | 1.38E-05 | HSP90AB1   |
| BP | GO:000177 | natural kill  | 8/905  | 22/18866  | 4.76E-06 | 2.65E-05 | 1.39E-05 | PGLYRP1/P  |
| BP | GO:000018 | activation    | 12/905 | 52/18866  | 4.82E-06 | 2.68E-05 | 1.41E-05 | F2R/EIF2A  |
| BP | GO:003021 | erythrocyt    | 19/905 | 121/18866 | 4.84E-06 | 2.69E-05 | 1.41E-05 | B2M/STAT   |
| BP | GO:003237 | positive re   | 14/905 | 70/18866  | 4.85E-06 | 2.70E-05 | 1.42E-05 | IL1B/FABP3 |
| BP | GO:200051 | positive re   | 10/905 | 36/18866  | 4.99E-06 | 2.77E-05 | 1.46E-05 | IFNG/XCL1  |
| BP | GO:000238 | immunogl      | 13/905 | 61/18866  | 5.04E-06 | 2.79E-05 | 1.47E-05 | HLA-DQB1   |
| BP | GO:000858 | female gon    | 17/905 | 100/18866 | 5.06E-06 | 2.80E-05 | 1.47E-05 | HSPA5/ICA  |
| BP | GO:005084 | regulation    | 17/905 | 100/18866 | 5.06E-06 | 2.80E-05 | 1.47E-05 | CD4/TNF/A  |
| BP | GO:001082 | regulation    | 25/905 | 191/18866 | 5.07E-06 | 2.80E-05 | 1.47E-05 | PSMD10/M   |
| BP | GO:004406 | regulation    | 11/905 | 44/18866  | 5.20E-06 | 2.87E-05 | 1.51E-05 | IL1B/F2R/F |
| BP | GO:000231 | B cell activ  | 15/905 | 80/18866  | 5.21E-06 | 2.87E-05 | 1.51E-05 | TGFB1/TFR  |
| BP | GO:000223 | positive re   | 9/905  | 29/18866  | 5.43E-06 | 2.98E-05 | 1.57E-05 | APOBEC3G   |
| BP | GO:001983 | cytolysis     | 9/905  | 29/18866  | 5.43E-06 | 2.98E-05 | 1.57E-05 | MICA/MICI  |
| BP | GO:004557 | regulation    | 9/905  | 29/18866  | 5.43E-06 | 2.98E-05 | 1.57E-05 | BTK/CARD   |
| BP | GO:005069 | regulation    | 9/905  | 29/18866  | 5.43E-06 | 2.98E-05 | 1.57E-05 | B2M/CD4/   |
| BP | GO:002178 | glial cell de | 19/905 | 122/18866 | 5.48E-06 | 3.00E-05 | 1.58E-05 | IFNG/S100  |
| BP | GO:004547 | response tr   | 19/905 | 122/18866 | 5.48E-06 | 3.00E-05 | 1.58E-05 | ICAM1/PSM  |
| BP | GO:007177 | response tr   | 23/905 | 168/18866 | 5.62E-06 | 3.08E-05 | 1.62E-05 | TGFB1/HJV  |
| BP | GO:007177 | cellular res  | 23/905 | 168/18866 | 5.62E-06 | 3.08E-05 | 1.62E-05 | TGFB1/HJV  |
| BP | GO:001482 | response tr   | 14/905 | 71/18866  | 5.78E-06 | 3.15E-05 | 1.66E-05 | ADIPOQ/C   |
| BP | GO:003362 | cell adhesi   | 14/905 | 71/18866  | 5.78E-06 | 3.15E-05 | 1.66E-05 | ICAM1/CXC  |
| BP | GO:003569 | cellular res  | 14/905 | 71/18866  | 5.78E-06 | 3.15E-05 | 1.66E-05 | HSPA5/HSF  |
| BP | GO:004657 | positive re   | 14/905 | 71/18866  | 5.78E-06 | 3.15E-05 | 1.66E-05 | F2R/F2RL1  |
| BP | GO:000716 | cell-matrix   | 28/905 | 230/18866 | 5.84E-06 | 3.18E-05 | 1.67E-05 | MMP12/PL   |
| BP | GO:004312 | negative re   | 12/905 | 53/18866  | 5.96E-06 | 3.24E-05 | 1.70E-05 | ADIPOQ/S1  |
| BP | GO:006175 | leukocyte     | 12/905 | 53/18866  | 5.96E-06 | 3.24E-05 | 1.70E-05 | ICAM1/CXC  |
| BP | GO:005110 | negative re   | 23/905 | 169/18866 | 6.22E-06 | 3.37E-05 | 1.77E-05 | B2M/SLPI/  |
| BP | GO:009724 | amyloid-be    | 10/905 | 37/18866  | 6.55E-06 | 3.55E-05 | 1.86E-05 | IFNG/TNF/  |
| BP | GO:190499 | regulation    | 10/905 | 37/18866  | 6.55E-06 | 3.55E-05 | 1.86E-05 | ICAM1/CXC  |

|    |           |              |        |           |          |          |          |            |
|----|-----------|--------------|--------|-----------|----------|----------|----------|------------|
| BP | GO:003412 | negative re  | 11/905 | 45/18866  | 6.59E-06 | 3.56E-05 | 1.87E-05 | BPIFB1/TLF |
| BP | GO:190464 | cellular res | 11/905 | 45/18866  | 6.59E-06 | 3.56E-05 | 1.87E-05 | ICAM1/AGI  |
| BP | GO:005502 | regulation   | 17/905 | 102/18866 | 6.67E-06 | 3.60E-05 | 1.89E-05 | TGFB1/RBF  |
| BP | GO:003017 | negative re  | 27/905 | 219/18866 | 6.73E-06 | 3.63E-05 | 1.91E-05 | PSMB8/PSI  |
| BP | GO:003236 | regulation   | 20/905 | 135/18866 | 6.83E-06 | 3.68E-05 | 1.93E-05 | IL1B/FABP3 |
| BP | GO:004259 | glucose ho   | 29/905 | 245/18866 | 6.97E-06 | 3.75E-05 | 1.97E-05 | ICAM1/RBF  |
| BP | GO:003269 | negative re  | 8/905  | 23/18866  | 7.00E-06 | 3.75E-05 | 1.97E-05 | IDO1/AGEF  |
| BP | GO:003574 | CD4-positi   | 8/905  | 23/18866  | 7.00E-06 | 3.75E-05 | 1.97E-05 | XCL1/IL1B/ |
| BP | GO:006044 | branching i  | 8/905  | 23/18866  | 7.00E-06 | 3.75E-05 | 1.97E-05 | TNF/FGF10  |
| BP | GO:000264 | regulation   | 7/905  | 17/18866  | 7.27E-06 | 3.88E-05 | 2.04E-05 | HLA-B/HLA  |
| BP | GO:001081 | regulation   | 7/905  | 17/18866  | 7.27E-06 | 3.88E-05 | 2.04E-05 | CXCL10/CX  |
| BP | GO:001573 | prostaglani  | 7/905  | 17/18866  | 7.27E-06 | 3.88E-05 | 2.04E-05 | IL1B/TNFSF |
| BP | GO:003054 | female gen   | 7/905  | 17/18866  | 7.27E-06 | 3.88E-05 | 2.04E-05 | RBP4/WNT   |
| BP | GO:004454 | NLRP3 infl   | 7/905  | 17/18866  | 7.27E-06 | 3.88E-05 | 2.04E-05 | EIF2AK2/DI |
| BP | GO:004476 | multi-orga   | 7/905  | 17/18866  | 7.27E-06 | 3.88E-05 | 2.04E-05 | CD4/CTSL/  |
| BP | GO:004853 | lymph nod    | 7/905  | 17/18866  | 7.27E-06 | 3.88E-05 | 2.04E-05 | LTA/TGFB1  |
| BP | GO:001052 | positive re  | 12/905 | 54/18866  | 7.34E-06 | 3.90E-05 | 2.05E-05 | CD4/CXCL1  |
| BP | GO:000652 | regulation   | 13/905 | 63/18866  | 7.35E-06 | 3.91E-05 | 2.05E-05 | PSMB8/PSI  |
| BP | GO:004337 | positive re  | 9/905  | 30/18866  | 7.43E-06 | 3.95E-05 | 2.07E-05 | IFNG/SOCS  |
| BP | GO:000974 | response tr  | 28/905 | 233/18866 | 7.49E-06 | 3.97E-05 | 2.09E-05 | ICAM1/IL1I |
| BP | GO:003350 | carbohydr    | 29/905 | 246/18866 | 7.55E-06 | 4.00E-05 | 2.10E-05 | ICAM1/RBF  |
| BP | GO:000863 | intrinsic ap | 17/905 | 103/18866 | 7.64E-06 | 4.05E-05 | 2.13E-05 | CXCL12/TN  |
| BP | GO:000989 | positive re  | 44/905 | 454/18866 | 7.81E-06 | 4.13E-05 | 2.17E-05 | HSP90AA1,  |
| BP | GO:000301 | renal syste  | 19/905 | 125/18866 | 7.88E-06 | 4.16E-05 | 2.19E-05 | ADIPOQ/F2  |
| BP | GO:000863 | apoptotic r  | 19/905 | 125/18866 | 7.88E-06 | 4.16E-05 | 2.19E-05 | PSMD10/M   |
| BP | GO:003269 | negative re  | 11/905 | 46/18866  | 8.29E-06 | 4.37E-05 | 2.30E-05 | TNFAIP3/IL |
| BP | GO:004558 | negative re  | 11/905 | 46/18866  | 8.29E-06 | 4.37E-05 | 2.30E-05 | IFNL1/SOC  |
| BP | GO:003022 | monocyte     | 10/905 | 38/18866  | 8.51E-06 | 4.48E-05 | 2.35E-05 | CD4/VEGF/  |
| BP | GO:190313 | mononucle    | 10/905 | 38/18866  | 8.51E-06 | 4.48E-05 | 2.35E-05 | CD4/VEGF/  |
| BP | GO:000286 | positive re  | 6/905  | 12/18866  | 8.63E-06 | 4.53E-05 | 2.38E-05 | FCER1G/LT  |
| BP | GO:007188 | macrophag    | 6/905  | 12/18866  | 8.63E-06 | 4.53E-05 | 2.38E-05 | CTSL/IRF3/ |
| BP | GO:190228 | semaphori    | 6/905  | 12/18866  | 8.63E-06 | 4.53E-05 | 2.38E-05 | SEMA3A/P   |
| BP | GO:007026 | necrotic ce  | 13/905 | 64/18866  | 8.82E-06 | 4.62E-05 | 2.43E-05 | IRF3/TNF/1 |
| BP | GO:004577 | positive re  | 16/905 | 94/18866  | 9.38E-06 | 4.91E-05 | 2.58E-05 | TGFB1/LTF  |
| BP | GO:004350 | positive re  | 14/905 | 74/18866  | 9.58E-06 | 5.01E-05 | 2.63E-05 | TNF/WNT5   |
| BP | GO:003277 | positive re  | 9/905  | 31/18866  | 1.00E-05 | 5.23E-05 | 2.75E-05 | IFNG/S100. |
| BP | GO:003952 | cytoplasm    | 9/905  | 31/18866  | 1.00E-05 | 5.23E-05 | 2.75E-05 | DDX58/IRF  |
| BP | GO:001046 | regulation   | 23/905 | 174/18866 | 1.02E-05 | 5.30E-05 | 2.78E-05 | IFNG/PLAU  |
| BP | GO:001057 | vascular en  | 13/905 | 65/18866  | 1.05E-05 | 5.49E-05 | 2.88E-05 | TGFB1/IL1E |
| BP | GO:009858 | cellular res | 13/905 | 65/18866  | 1.05E-05 | 5.49E-05 | 2.88E-05 | MMP12/DI   |
| BP | GO:004340 | steroid hor  | 20/905 | 139/18866 | 1.07E-05 | 5.56E-05 | 2.92E-05 | CALR/SRC/  |
| BP | GO:003266 | regulation   | 10/905 | 39/18866  | 1.10E-05 | 5.69E-05 | 2.99E-05 | IFNG/TGFB  |
| BP | GO:004566 | negative re  | 27/905 | 225/18866 | 1.11E-05 | 5.77E-05 | 3.03E-05 | B2M/CALR,  |
| BP | GO:003803 | signal tran  | 14/905 | 75/18866  | 1.13E-05 | 5.84E-05 | 3.07E-05 | LCN2/IL1B/ |
| BP | GO:009719 | extrinsic a  | 14/905 | 75/18866  | 1.13E-05 | 5.84E-05 | 3.07E-05 | LCN2/IL1B/ |
| BP | GO:001088 | regulation   | 7/905  | 18/18866  | 1.14E-05 | 5.89E-05 | 3.10E-05 | MSR1/PPA   |
| BP | GO:004688 | regulation   | 7/905  | 18/18866  | 1.14E-05 | 5.89E-05 | 3.10E-05 | ADM/BMP.   |
| BP | GO:200118 | regulation   | 7/905  | 18/18866  | 1.14E-05 | 5.89E-05 | 3.10E-05 | HLA-A/XCL  |
| BP | GO:003133 | positive re  | 39/905 | 390/18866 | 1.24E-05 | 6.40E-05 | 3.37E-05 | HSP90AA1,  |
| BP | GO:000256 | somatic div  | 13/905 | 66/18866  | 1.26E-05 | 6.46E-05 | 3.40E-05 | TGFB1/TFR  |

|    |                         |        |           |          |          |          |             |
|----|-------------------------|--------|-----------|----------|----------|----------|-------------|
| BP | GO:001644 somatic cell  | 13/905 | 66/18866  | 1.26E-05 | 6.46E-05 | 3.40E-05 | TGFB1/TFR   |
| BP | GO:003276 regulation    | 13/905 | 66/18866  | 1.26E-05 | 6.46E-05 | 3.40E-05 | HSP90AA1,   |
| BP | GO:000940 response to   | 11/905 | 48/18866  | 1.29E-05 | 6.61E-05 | 3.47E-05 | HSPA2/HSF   |
| BP | GO:005077 positive re   | 15/905 | 86/18866  | 1.31E-05 | 6.71E-05 | 3.53E-05 | CXCL12/VE   |
| BP | GO:006019 positive re   | 14/905 | 76/18866  | 1.32E-05 | 6.78E-05 | 3.56E-05 | CCL5/PDGF   |
| BP | GO:000209 regulation    | 12/905 | 57/18866  | 1.32E-05 | 6.78E-05 | 3.57E-05 | VEGFA/ARI   |
| BP | GO:004584 positive re   | 12/905 | 57/18866  | 1.32E-05 | 6.78E-05 | 3.57E-05 | IL1B/IL1A/I |
| BP | GO:005086 negative re   | 9/905  | 32/18866  | 1.34E-05 | 6.83E-05 | 3.59E-05 | TNFAIP3/IL  |
| BP | GO:190188 negative re   | 9/905  | 32/18866  | 1.34E-05 | 6.83E-05 | 3.59E-05 | TLR2/IL1B/  |
| BP | GO:004663 negative re   | 10/905 | 40/18866  | 1.40E-05 | 7.13E-05 | 3.75E-05 | XLCL1/SOCS  |
| BP | GO:004871 regulation    | 10/905 | 40/18866  | 1.40E-05 | 7.13E-05 | 3.75E-05 | TLR2/HDAC   |
| BP | GO:006057 morphogen     | 8/905  | 25/18866  | 1.42E-05 | 7.22E-05 | 3.80E-05 | WNT5A/FC    |
| BP | GO:001082 positive re   | 18/905 | 119/18866 | 1.45E-05 | 7.40E-05 | 3.89E-05 | MMP9/TNI    |
| BP | GO:003252 response to   | 17/905 | 108/18866 | 1.46E-05 | 7.43E-05 | 3.90E-05 | MICB/RBP4   |
| BP | GO:006007 Wnt signal    | 17/905 | 108/18866 | 1.46E-05 | 7.43E-05 | 3.90E-05 | PSMB8/PSI   |
| BP | GO:000267 respiratory   | 6/905  | 13/18866  | 1.54E-05 | 7.79E-05 | 4.09E-05 | LBP/MPO/I   |
| BP | GO:001074 negative re   | 6/905  | 13/18866  | 1.54E-05 | 7.79E-05 | 4.09E-05 | CETP/ADIP   |
| BP | GO:004324 proteasom     | 6/905  | 13/18866  | 1.54E-05 | 7.79E-05 | 4.09E-05 | PSMD4/PSI   |
| BP | GO:190294 regulation    | 6/905  | 13/18866  | 1.54E-05 | 7.79E-05 | 4.09E-05 | HSP90AA1,   |
| BP | GO:000220 somatic div   | 14/905 | 77/18866  | 1.54E-05 | 7.81E-05 | 4.10E-05 | TGFB1/TFR   |
| BP | GO:006041 cardiac sep   | 14/905 | 77/18866  | 1.54E-05 | 7.81E-05 | 4.10E-05 | WNT5A/SE    |
| BP | GO:003134 positive re   | 39/905 | 394/18866 | 1.57E-05 | 7.93E-05 | 4.17E-05 | HSPA5/CXC   |
| BP | GO:190379 positive re   | 12/905 | 58/18866  | 1.60E-05 | 8.06E-05 | 4.24E-05 | IL1B/FABP3  |
| BP | GO:004506 T-helper 1    | 7/905  | 19/18866  | 1.73E-05 | 8.71E-05 | 4.58E-05 | RELB/IL27/  |
| BP | GO:006074 mammary       | 7/905  | 19/18866  | 1.73E-05 | 8.71E-05 | 4.58E-05 | VEGFA/TNI   |
| BP | GO:006137 mammary       | 7/905  | 19/18866  | 1.73E-05 | 8.71E-05 | 4.58E-05 | VEGFA/TNI   |
| BP | GO:005081 regulation    | 15/905 | 88/18866  | 1.74E-05 | 8.75E-05 | 4.60E-05 | FCER1G/PF   |
| BP | GO:000286 regulation    | 9/905  | 33/18866  | 1.76E-05 | 8.83E-05 | 4.64E-05 | FCER1G/LT   |
| BP | GO:004578 positive re   | 39/905 | 396/18866 | 1.76E-05 | 8.84E-05 | 4.65E-05 | CALR/HSPA   |
| BP | GO:004231 vasoconstr    | 14/905 | 78/18866  | 1.80E-05 | 9.02E-05 | 4.74E-05 | ICAM1/F2F   |
| BP | GO:003139 positive re   | 18/905 | 121/18866 | 1.84E-05 | 9.19E-05 | 4.83E-05 | HSPA5/PSM   |
| BP | GO:009017 regulation    | 17/905 | 110/18866 | 1.87E-05 | 9.37E-05 | 4.92E-05 | PSMB8/PSI   |
| BP | GO:001400 glial cell pr | 11/905 | 50/18866  | 1.95E-05 | 9.72E-05 | 5.11E-05 | LTA/IL1B/T  |
| BP | GO:200072 regulation    | 11/905 | 50/18866  | 1.95E-05 | 9.72E-05 | 5.11E-05 | TGFB1/BM    |
| BP | GO:003166 regulation    | 8/905  | 26/18866  | 1.96E-05 | 9.78E-05 | 5.14E-05 | LTF/TNFAIF  |
| BP | GO:001081 positive re   | 18/905 | 122/18866 | 2.06E-05 | 0.000103 | 5.39E-05 | CALR/VEGF   |
| BP | GO:200024 regulation    | 22/905 | 170/18866 | 2.20E-05 | 0.00011  | 5.76E-05 | CALR/DEFB   |
| BP | GO:190403 positive re   | 10/905 | 42/18866  | 2.22E-05 | 0.000111 | 5.82E-05 | HLA-G/CD4   |
| BP | GO:000288 positive re   | 9/905  | 34/18866  | 2.29E-05 | 0.000114 | 5.98E-05 | FCER1G/DI   |
| BP | GO:000720 activation    | 9/905  | 34/18866  | 2.29E-05 | 0.000114 | 5.98E-05 | CD86/C5AF   |
| BP | GO:001922 regulation    | 12/905 | 60/18866  | 2.30E-05 | 0.000114 | 5.99E-05 | ICAM1/F2F   |
| BP | GO:003527 exocrine sy   | 11/905 | 51/18866  | 2.38E-05 | 0.000118 | 6.19E-05 | TGFB1/TNF   |
| BP | GO:006019 regulation    | 16/905 | 101/18866 | 2.39E-05 | 0.000118 | 6.21E-05 | CCL5/PDGF   |
| BP | GO:000204 sprouting     | 24/905 | 196/18866 | 2.41E-05 | 0.000119 | 6.27E-05 | S100A1/VE   |
| BP | GO:003030 positive re   | 22/905 | 171/18866 | 2.41E-05 | 0.000119 | 6.27E-05 | PSMD10/C    |
| BP | GO:000315 outflow tra   | 14/905 | 80/18866  | 2.43E-05 | 0.00012  | 6.30E-05 | VEGFA/WN    |
| BP | GO:000253 cytokine pr   | 13/905 | 70/18866  | 2.44E-05 | 0.00012  | 6.33E-05 | APOD/TNF,   |
| BP | GO:007169 anatomical    | 27/905 | 235/18866 | 2.45E-05 | 0.000121 | 6.35E-05 | DEFB1/PAE   |
| BP | GO:190406 positive re   | 20/905 | 147/18866 | 2.47E-05 | 0.000122 | 6.40E-05 | HSPA2/IFN   |
| BP | GO:001087 cholesterol   | 7/905  | 20/18866  | 2.55E-05 | 0.000125 | 6.59E-05 | MSR1/PPA    |

|    |           |               |        |           |          |          |          |             |
|----|-----------|---------------|--------|-----------|----------|----------|----------|-------------|
| BP | GO:003281 | positive re   | 7/905  | 20/18866  | 2.55E-05 | 0.000125 | 6.59E-05 | HLA-F/IL15  |
| BP | GO:200019 | positive re   | 7/905  | 20/18866  | 2.55E-05 | 0.000125 | 6.59E-05 | IL1B/FABP6  |
| BP | GO:000173 | establishm    | 18/905 | 124/18866 | 2.58E-05 | 0.000126 | 6.64E-05 | PSMB8/PSI   |
| BP | GO:000716 | establishm    | 18/905 | 124/18866 | 2.58E-05 | 0.000126 | 6.64E-05 | PSMB8/PSI   |
| BP | GO:007048 | leukocyte     | 6/905  | 14/18866  | 2.58E-05 | 0.000126 | 6.64E-05 | S100A9/S1   |
| BP | GO:007221 | positive re   | 6/905  | 14/18866  | 2.58E-05 | 0.000126 | 6.64E-05 | ADIPOQ/PI   |
| BP | GO:000635 | DNA-templ     | 28/905 | 249/18866 | 2.59E-05 | 0.000127 | 6.66E-05 | PSMC2/PSI   |
| BP | GO:001097 | positive re   | 31/905 | 290/18866 | 2.66E-05 | 0.00013  | 6.84E-05 | HSPA5/CXC   |
| BP | GO:004567 | positive re   | 8/905  | 27/18866  | 2.67E-05 | 0.00013  | 6.85E-05 | IFNG/TNF/   |
| BP | GO:001470 | striated m    | 38/905 | 389/18866 | 2.70E-05 | 0.000131 | 6.91E-05 | CALR/S100   |
| BP | GO:001057 | regulation    | 12/905 | 61/18866  | 2.73E-05 | 0.000133 | 6.99E-05 | TGFB1/IL1E  |
| BP | GO:004557 | mast cell     | ar     | 12/905    | 61/18866 | 2.73E-05 | 0.000133 | FCER1G/NI   |
| BP | GO:004688 | negative re   | 12/905 | 61/18866  | 2.73E-05 | 0.000133 | 6.99E-05 | IL1B/ADIPC  |
| BP | GO:004512 | regulation    | 10/905 | 43/18866  | 2.77E-05 | 0.000135 | 7.09E-05 | TFRC/TNFFA  |
| BP | GO:000196 | negative re   | 14/905 | 81/18866  | 2.81E-05 | 0.000136 | 7.16E-05 | MMP12/AI    |
| BP | GO:004269 | muscle cell   | 38/905 | 390/18866 | 2.85E-05 | 0.000138 | 7.27E-05 | CALR/CXCL   |
| BP | GO:005178 | positive re   | 13/905 | 71/18866  | 2.86E-05 | 0.000139 | 7.28E-05 | IL1B/WNT5   |
| BP | GO:003233 | regulation    | 11/905 | 52/18866  | 2.88E-05 | 0.00014  | 7.34E-05 | FGF18/GDF   |
| BP | GO:001993 | cAMP-med      | 24/905 | 199/18866 | 3.10E-05 | 0.00015  | 7.88E-05 | CXCL10/CX   |
| BP | GO:004573 | positive re   | 26/905 | 225/18866 | 3.12E-05 | 0.000151 | 7.92E-05 | HSP90AA1,   |
| BP | GO:000320 | cardiac cha   | 22/905 | 174/18866 | 3.17E-05 | 0.000153 | 8.04E-05 | TGFB1/RBF   |
| BP | GO:003019 | regulation    | 14/905 | 82/18866  | 3.24E-05 | 0.000156 | 8.20E-05 | FCER1G/PL   |
| BP | GO:003411 | heterotypic   | 12/905 | 62/18866  | 3.24E-05 | 0.000156 | 8.22E-05 | IL1B/TNF/A  |
| BP | GO:000686 | lipid transp  | 38/905 | 393/18866 | 3.38E-05 | 0.000163 | 8.54E-05 | FABP6/IL1E  |
| BP | GO:009027 | regulation    | 25/905 | 213/18866 | 3.39E-05 | 0.000163 | 8.57E-05 | IFNG/IL1B/  |
| BP | GO:000301 | muscle sys    | 43/905 | 467/18866 | 3.41E-05 | 0.000164 | 8.62E-05 | IL1B/IL15/f |
| BP | GO:199077 | response tr   | 8/905  | 28/18866  | 3.58E-05 | 0.000172 | 9.04E-05 | CYBB/SRC/   |
| BP | GO:006053 | muscle tiss   | 39/905 | 409/18866 | 3.64E-05 | 0.000175 | 9.19E-05 | CALR/S100   |
| BP | GO:007257 | hepatocyte    | 7/905  | 21/18866  | 3.67E-05 | 0.000176 | 9.25E-05 | TNFAIP3/M   |
| BP | GO:007257 | epithelial c  | 7/905  | 21/18866  | 3.67E-05 | 0.000176 | 9.25E-05 | TNFAIP3/M   |
| BP | GO:003114 | anaphase-p    | 14/905 | 83/18866  | 3.72E-05 | 0.000178 | 9.36E-05 | PSMB8/PSI   |
| BP | GO:190004 | regulation    | 14/905 | 83/18866  | 3.72E-05 | 0.000178 | 9.36E-05 | FCER1G/PL   |
| BP | GO:003019 | extracellul   | 38/905 | 395/18866 | 3.77E-05 | 0.00018  | 9.43E-05 | CTSL/ICAM   |
| BP | GO:001009 | specificatio  | 9/905  | 36/18866  | 3.77E-05 | 0.00018  | 9.43E-05 | WNT5A/FG    |
| BP | GO:003112 | developme     | 9/905  | 36/18866  | 3.77E-05 | 0.00018  | 9.43E-05 | WNT5A/FG    |
| BP | GO:004562 | regulation    | 9/905  | 36/18866  | 3.77E-05 | 0.00018  | 9.43E-05 | IL27/TNFSF  |
| BP | GO:190533 | positive re   | 9/905  | 36/18866  | 3.77E-05 | 0.00018  | 9.43E-05 | VEGFA/AG    |
| BP | GO:003153 | actin cytos   | 16/905 | 105/18866 | 3.91E-05 | 0.000186 | 9.77E-05 | PTK2B/HCK   |
| BP | GO:004666 | male sex di   | 21/905 | 164/18866 | 3.94E-05 | 0.000187 | 9.83E-05 | ICAM1/TLR   |
| BP | GO:001087 | lipid localiz | 41/905 | 440/18866 | 3.94E-05 | 0.000187 | 9.83E-05 | FABP6/IL1E  |
| BP | GO:004306 | extracellul   | 38/905 | 396/18866 | 3.98E-05 | 0.000189 | 9.93E-05 | CTSL/ICAM   |
| BP | GO:000228 | macrophag     | 6/905  | 15/18866  | 4.13E-05 | 0.000195 | 0.000102 | IFNG/LBP/I  |
| BP | GO:003563 | entry of ba   | 6/905  | 15/18866  | 4.13E-05 | 0.000195 | 0.000102 | CXCL8/ITG,  |
| BP | GO:004297 | activation    | 6/905  | 15/18866  | 4.13E-05 | 0.000195 | 0.000102 | SOCS1/CCL   |
| BP | GO:006009 | regulation    | 6/905  | 15/18866  | 4.13E-05 | 0.000195 | 0.000102 | F2RL1/PPA   |
| BP | GO:009720 | activation    | 6/905  | 15/18866  | 4.13E-05 | 0.000195 | 0.000102 | IFI16/RIPK2 |
| BP | GO:190022 | regulation    | 6/905  | 15/18866  | 4.13E-05 | 0.000195 | 0.000102 | EIF2AK2/DI  |
| BP | GO:200034 | regulation    | 6/905  | 15/18866  | 4.13E-05 | 0.000195 | 0.000102 | TNFAIP3/M   |
| BP | GO:000197 | blood vess    | 10/905 | 45/18866  | 4.23E-05 | 0.000199 | 0.000104 | TGFB1/DLL   |
| BP | GO:000263 | positive re   | 10/905 | 45/18866  | 4.23E-05 | 0.000199 | 0.000104 | XCL1/TGFB   |

|    |           |              |        |           |          |          |          |            |
|----|-----------|--------------|--------|-----------|----------|----------|----------|------------|
| BP | GO:004311 | regulation   | 10/905 | 45/18866  | 4.23E-05 | 0.000199 | 0.000104 | TGFB1/VEG  |
| BP | GO:006044 | mammary      | 10/905 | 45/18866  | 4.23E-05 | 0.000199 | 0.000104 | PML/WNT5   |
| BP | GO:007026 | necroptotic  | 10/905 | 45/18866  | 4.23E-05 | 0.000199 | 0.000104 | TNF/TLR3/I |
| BP | GO:003027 | negative re  | 14/905 | 84/18866  | 4.27E-05 | 0.0002   | 0.000105 | TNF/CCL3/I |
| BP | GO:001923 | sensory pe   | 16/905 | 106/18866 | 4.40E-05 | 0.000206 | 0.000108 | CXCL12/FA  |
| BP | GO:190303 | positive re  | 13/905 | 74/18866  | 4.51E-05 | 0.000211 | 0.000111 | DUOX1/DU   |
| BP | GO:003250 | maintenan    | 12/905 | 64/18866  | 4.52E-05 | 0.000211 | 0.000111 | CD4/HSPA5  |
| BP | GO:000271 | positive re  | 8/905  | 29/18866  | 4.74E-05 | 0.000222 | 0.000116 | HLA-F/HLA  |
| BP | GO:200027 | positive re  | 9/905  | 37/18866  | 4.77E-05 | 0.000223 | 0.000117 | IFNG/CCL2, |
| BP | GO:003209 | positive re  | 14/905 | 85/18866  | 4.89E-05 | 0.000228 | 0.00012  | B2M/HSP9   |
| BP | GO:000300 | heart morp   | 28/905 | 258/18866 | 4.92E-05 | 0.000229 | 0.00012  | TGFB1/RBF  |
| BP | GO:001088 | negative re  | 7/905  | 22/18866  | 5.17E-05 | 0.000238 | 0.000125 | TNF/ITGAV  |
| BP | GO:003612 | cellular res | 7/905  | 22/18866  | 5.17E-05 | 0.000238 | 0.000125 | SRC/PDGGF  |
| BP | GO:004506 | thymic T ce  | 7/905  | 22/18866  | 5.17E-05 | 0.000238 | 0.000125 | CCR7/CARL  |
| BP | GO:007115 | negative re  | 7/905  | 22/18866  | 5.17E-05 | 0.000238 | 0.000125 | CALR/HSP9  |
| BP | GO:007257 | liver morp   | 7/905  | 22/18866  | 5.17E-05 | 0.000238 | 0.000125 | TNFAIP3/M  |
| BP | GO:000312 | heart induc  | 5/905  | 10/18866  | 5.17E-05 | 0.000238 | 0.000125 | WNT5A/RC   |
| BP | GO:003281 | negative re  | 5/905  | 10/18866  | 5.17E-05 | 0.000238 | 0.000125 | HLA-F/MIC  |
| BP | GO:003497 | protein fol  | 5/905  | 10/18866  | 5.17E-05 | 0.000238 | 0.000125 | CALR/PDIA  |
| BP | GO:004562 | regulation   | 5/905  | 10/18866  | 5.17E-05 | 0.000238 | 0.000125 | IL27/TNFSF |
| BP | GO:006006 | vagina dev   | 5/905  | 10/18866  | 5.17E-05 | 0.000238 | 0.000125 | RBP4/WNT   |
| BP | GO:006060 | dichotomo    | 5/905  | 10/18866  | 5.17E-05 | 0.000238 | 0.000125 | SEMA3A/S   |
| BP | GO:007039 | response tr  | 5/905  | 10/18866  | 5.17E-05 | 0.000238 | 0.000125 | TLR2/LBP/I |
| BP | GO:007122 | cellular res | 5/905  | 10/18866  | 5.17E-05 | 0.000238 | 0.000125 | TLR2/LBP/I |
| BP | GO:009003 | positive re  | 5/905  | 10/18866  | 5.17E-05 | 0.000238 | 0.000125 | CD40/VEGI  |
| BP | GO:003230 | icosanoid s  | 10/905 | 46/18866  | 5.18E-05 | 0.000238 | 0.000125 | IL1B/PLA2C |
| BP | GO:003592 | cellular res | 13/905 | 75/18866  | 5.22E-05 | 0.00024  | 0.000126 | VEGFA/DLL  |
| BP | GO:004864 | animal org   | 12/905 | 65/18866  | 5.30E-05 | 0.000244 | 0.000128 | MAPK3/WI   |
| BP | GO:190495 | negative re  | 20/905 | 155/18866 | 5.35E-05 | 0.000246 | 0.000129 | IL1B/APOD  |
| BP | GO:001921 | regulation   | 18/905 | 131/18866 | 5.44E-05 | 0.000249 | 0.000131 | IFNG/NFYA  |
| BP | GO:004566 | regulation   | 18/905 | 131/18866 | 5.44E-05 | 0.000249 | 0.000131 | LTF/TNF/P  |
| BP | GO:009775 | negative re  | 14/905 | 86/18866  | 5.59E-05 | 0.000256 | 0.000135 | ICAM1/F2F  |
| BP | GO:000761 | learning or  | 28/905 | 260/18866 | 5.64E-05 | 0.000258 | 0.000136 | B2M/S100I  |
| BP | GO:000718 | adenylate c  | 26/905 | 233/18866 | 5.67E-05 | 0.000259 | 0.000136 | CXCL10/CX  |
| BP | GO:190165 | cellular res | 15/905 | 97/18866  | 5.68E-05 | 0.000259 | 0.000136 | ICAM1/GN   |
| BP | GO:001094 | negative re  | 35/905 | 359/18866 | 5.76E-05 | 0.000263 | 0.000138 | CALR/HLA-  |
| BP | GO:003428 | response tr  | 24/905 | 207/18866 | 5.88E-05 | 0.000268 | 0.000141 | ICAM1/NO   |
| BP | GO:001644 | somatic re   | 11/905 | 56/18866  | 5.97E-05 | 0.000272 | 0.000143 | TGFB1/TFR  |
| BP | GO:000315 | regulation   | 9/905  | 38/18866  | 5.99E-05 | 0.000272 | 0.000143 | WNT5A/FG   |
| BP | GO:004659 | regulation   | 9/905  | 38/18866  | 5.99E-05 | 0.000272 | 0.000143 | CD4/TRIM2  |
| BP | GO:190352 | positive re  | 13/905 | 76/18866  | 6.02E-05 | 0.000274 | 0.000144 | ICAM1/F2F  |
| BP | GO:000705 | cell cycle a | 26/905 | 234/18866 | 6.09E-05 | 0.000277 | 0.000145 | CALR/HSP9  |
| BP | GO:000717 | regulation   | 8/905  | 30/18866  | 6.19E-05 | 0.000281 | 0.000148 | AREG/BTC,  |
| BP | GO:003271 | negative re  | 12/905 | 66/18866  | 6.20E-05 | 0.000281 | 0.000148 | TNF/NLRX1  |
| BP | GO:200027 | regulation   | 16/905 | 109/18866 | 6.23E-05 | 0.000282 | 0.000148 | HSP90AA1,  |
| BP | GO:009031 | positive re  | 22/905 | 182/18866 | 6.32E-05 | 0.000285 | 0.00015  | HSP90AB1,  |
| BP | GO:000283 | positive re  | 6/905  | 16/18866  | 6.34E-05 | 0.000285 | 0.00015  | XCL1/IDO1  |
| BP | GO:000283 | regulation   | 6/905  | 16/18866  | 6.34E-05 | 0.000285 | 0.00015  | MR1/IL12A  |
| BP | GO:000283 | regulation   | 6/905  | 16/18866  | 6.34E-05 | 0.000285 | 0.00015  | MR1/IL12A  |
| BP | GO:001082 | positive re  | 6/905  | 16/18866  | 6.34E-05 | 0.000285 | 0.00015  | CXCL13/XC  |



|    |           |                                    |        |           |          |          |          |             |
|----|-----------|------------------------------------|--------|-----------|----------|----------|----------|-------------|
| BP | GO:003437 | low-density lipoprotein receptor   | 6/905  | 16/18866  | 6.34E-05 | 0.000285 | 0.00015  | CETP/PLA2   |
| BP | GO:004801 | hepatocyte                         | 6/905  | 16/18866  | 6.34E-05 | 0.000285 | 0.00015  | ESM1/MET    |
| BP | GO:190515 | regulation of                      | 6/905  | 16/18866  | 6.34E-05 | 0.000285 | 0.00015  | F2RL1/PPA   |
| BP | GO:006076 | negative regulation of             | 14/905 | 87/18866  | 6.37E-05 | 0.000286 | 0.000151 | MMP12/AI    |
| BP | GO:001077 | negative regulation of             | 15/905 | 98/18866  | 6.41E-05 | 0.000288 | 0.000151 | WNT5A/PT    |
| BP | GO:003050 | regulation of                      | 13/905 | 77/18866  | 6.93E-05 | 0.000311 | 0.000164 | TGFB1/LTF   |
| BP | GO:003611 | response to                        | 7/905  | 23/18866  | 7.12E-05 | 0.000319 | 0.000167 | SRC/PDGFF   |
| BP | GO:007221 | regulation of                      | 7/905  | 23/18866  | 7.12E-05 | 0.000319 | 0.000167 | ADIPOQ/S1   |
| BP | GO:190495 | positive regulation of             | 7/905  | 23/18866  | 7.12E-05 | 0.000319 | 0.000167 | ICAM1/TNI   |
| BP | GO:190001 | regulation of                      | 12/905 | 67/18866  | 7.23E-05 | 0.000323 | 0.00017  | APOD/TNF    |
| BP | GO:004325 | regulation of                      | 15/905 | 99/18866  | 7.23E-05 | 0.000323 | 0.00017  | TGFB1/ADI   |
| BP | GO:005130 | regulation of                      | 21/905 | 171/18866 | 7.31E-05 | 0.000326 | 0.000172 | TGFB1/IL1   |
| BP | GO:003315 | regulation of                      | 28/905 | 264/18866 | 7.38E-05 | 0.000329 | 0.000173 | HSP90AB1,   |
| BP | GO:004516 | cell fate commitment               | 29/905 | 278/18866 | 7.45E-05 | 0.000332 | 0.000174 | CTSL/PML/   |
| BP | GO:011005 | regulation of                      | 29/905 | 278/18866 | 7.45E-05 | 0.000332 | 0.000174 | ICAM1/CXC   |
| BP | GO:003269 | negative regulation of             | 9/905  | 39/18866  | 7.46E-05 | 0.000332 | 0.000174 | TNFAIP3/C   |
| BP | GO:003195 | regulation of                      | 10/905 | 48/18866  | 7.62E-05 | 0.000338 | 0.000178 | ADIPOQ/VI   |
| BP | GO:003362 | regulation of                      | 10/905 | 48/18866  | 7.62E-05 | 0.000338 | 0.000178 | CXCL13/PL   |
| BP | GO:006024 | anatomical structure morphogenesis | 42/905 | 469/18866 | 7.90E-05 | 0.000351 | 0.000184 | AZGP1/B2N   |
| BP | GO:004390 | regulation of                      | 13/905 | 78/18866  | 7.96E-05 | 0.000353 | 0.000186 | CALR/PAEP   |
| BP | GO:004594 | positive regulation of             | 8/905  | 31/18866  | 8.00E-05 | 0.000354 | 0.000186 | IFNG/IL1B/  |
| BP | GO:200051 | negative regulation of             | 8/905  | 31/18866  | 8.00E-05 | 0.000354 | 0.000186 | XCL1/ARG2   |
| BP | GO:000315 | endothelial cell                   | 18/905 | 135/18866 | 8.11E-05 | 0.000359 | 0.000189 | ICAM1/CXC   |
| BP | GO:004566 | positive regulation of             | 36/905 | 380/18866 | 8.20E-05 | 0.000363 | 0.000191 | HSPA5/CXC   |
| BP | GO:000288 | regulation of                      | 11/905 | 58/18866  | 8.36E-05 | 0.000369 | 0.000194 | FCER1G/DI   |
| BP | GO:005114 | striated muscle cell               | 30/905 | 295/18866 | 8.98E-05 | 0.000396 | 0.000208 | CALR/CXCL   |
| BP | GO:000309 | regulation of                      | 5/905  | 11/18866  | 9.11E-05 | 0.000401 | 0.000211 | F2R/F2RL1,  |
| BP | GO:004480 | multi-organism                     | 5/905  | 11/18866  | 9.11E-05 | 0.000401 | 0.000211 | CD4/CTSL/   |
| BP | GO:005113 | NK cell activation                 | 5/905  | 11/18866  | 9.11E-05 | 0.000401 | 0.000211 | IL15/IL12A, |
| BP | GO:005171 | positive regulation of             | 5/905  | 11/18866  | 9.11E-05 | 0.000401 | 0.000211 | IFNG/F2RL   |
| BP | GO:001590 | fatty acid transport               | 15/905 | 101/18866 | 9.14E-05 | 0.000402 | 0.000211 | IL1B/FABP   |
| BP | GO:009019 | regulation of                      | 10/905 | 49/18866  | 9.16E-05 | 0.000402 | 0.000212 | PSMD10/M    |
| BP | GO:000199 | regulation of                      | 9/905  | 40/18866  | 9.22E-05 | 0.000404 | 0.000212 | CTSG/F2R/   |
| BP | GO:003289 | positive regulation of             | 9/905  | 40/18866  | 9.22E-05 | 0.000404 | 0.000212 | IL1B/FABP   |
| BP | GO:005128 | positive regulation of             | 9/905  | 40/18866  | 9.22E-05 | 0.000404 | 0.000212 | CXCL10/CX   |
| BP | GO:000725 | activation of                      | 6/905  | 17/18866  | 9.40E-05 | 0.000411 | 0.000216 | TLR3/TNFR   |
| BP | GO:003230 | positive regulation of             | 6/905  | 17/18866  | 9.40E-05 | 0.000411 | 0.000216 | IL1B/TNFSF  |
| BP | GO:003268 | negative regulation of             | 6/905  | 17/18866  | 9.40E-05 | 0.000411 | 0.000216 | APOD/ARG    |
| BP | GO:007136 | cellular response to               | 6/905  | 17/18866  | 9.40E-05 | 0.000411 | 0.000216 | DDX58/IRF   |
| BP | GO:000243 | acute inflammation                 | 7/905  | 24/18866  | 9.64E-05 | 0.00042  | 0.00022  | FCER1G/IC   |
| BP | GO:003600 | positive regulation of             | 7/905  | 24/18866  | 9.64E-05 | 0.00042  | 0.00022  | HSPA5/VEG   |
| BP | GO:004406 | regulation of                      | 7/905  | 24/18866  | 9.64E-05 | 0.00042  | 0.00022  | EDNRB/AG    |
| BP | GO:006044 | branching in                       | 7/905  | 24/18866  | 9.64E-05 | 0.00042  | 0.00022  | PML/WNT     |
| BP | GO:003296 | collagen maturation                | 16/905 | 113/18866 | 9.67E-05 | 0.000421 | 0.000221 | CTSB/CTSL,  |
| BP | GO:200057 | positive regulation of             | 12/905 | 69/18866  | 9.73E-05 | 0.000423 | 0.000222 | HSP90AA1,   |
| BP | GO:004230 | regulation of                      | 11/905 | 59/18866  | 9.84E-05 | 0.000427 | 0.000225 | HSP90AB1,   |
| BP | GO:003527 | endocrine system                   | 17/905 | 125/18866 | 9.89E-05 | 0.000429 | 0.000225 | MAPK3/WI    |
| BP | GO:004350 | muscle adaptation                  | 17/905 | 125/18866 | 9.89E-05 | 0.000429 | 0.000225 | IL1B/IL15/  |
| BP | GO:000020 | protein polymerization             | 33/905 | 340/18866 | 0.000101 | 0.000438 | 0.00023  | PSMB8/PSI   |
| BP | GO:006060 | mammary gland                      | 8/905  | 32/18866  | 0.000102 | 0.000442 | 0.000233 | PML/WNT     |

|    |           |               |        |           |          |          |          |            |
|----|-----------|---------------|--------|-----------|----------|----------|----------|------------|
| BP | GO:003134 | negative re   | 22/905 | 188/18866 | 0.000103 | 0.000444 | 0.000234 | B2M/WNT1   |
| BP | GO:000300 | regionaliza   | 34/905 | 355/18866 | 0.000104 | 0.000448 | 0.000236 | WNT5A/DL   |
| BP | GO:009730 | cellular res  | 14/905 | 91/18866  | 0.000105 | 0.000455 | 0.000239 | CYBB/GNA   |
| BP | GO:000327 | cardiac sep   | 16/905 | 114/18866 | 0.000108 | 0.000464 | 0.000244 | WNT5A/LT   |
| BP | GO:003121 | biomineral    | 20/905 | 163/18866 | 0.000109 | 0.000469 | 0.000247 | HTN3/HTN   |
| BP | GO:011014 | biomineral    | 20/905 | 163/18866 | 0.000109 | 0.000469 | 0.000247 | HTN3/HTN   |
| BP | GO:000304 | regulation    | 10/905 | 50/18866  | 0.00011  | 0.000471 | 0.000248 | CTSG/F2R/  |
| BP | GO:007171 | icosanoid t   | 10/905 | 50/18866  | 0.00011  | 0.000471 | 0.000248 | IL1B/PLA2C |
| BP | GO:190157 | fatty acid d  | 10/905 | 50/18866  | 0.00011  | 0.000471 | 0.000248 | IL1B/PLA2C |
| BP | GO:190470 | positive re   | 10/905 | 50/18866  | 0.00011  | 0.000471 | 0.000248 | MMP9/TNI   |
| BP | GO:000974 | response tr   | 23/905 | 202/18866 | 0.00011  | 0.000471 | 0.000248 | ICAM1/NO   |
| BP | GO:005079 | regulation    | 12/905 | 70/18866  | 0.000112 | 0.000482 | 0.000253 | PTGDS/CCL  |
| BP | GO:003357 | response tr   | 9/905  | 41/18866  | 0.000113 | 0.000485 | 0.000255 | CALR/EPO/  |
| BP | GO:005122 | negative re   | 19/905 | 151/18866 | 0.000115 | 0.000491 | 0.000258 | IL1B/APOD  |
| BP | GO:000182 | mesonephr     | 15/905 | 103/18866 | 0.000115 | 0.000491 | 0.000258 | VEGFA/AR   |
| BP | GO:000183 | release of    | 11/905 | 60/18866  | 0.000115 | 0.000492 | 0.000259 | PSMD10/M   |
| BP | GO:004338 | positive re   | 11/905 | 60/18866  | 0.000115 | 0.000492 | 0.000259 | IFNG/TGFB  |
| BP | GO:004353 | regulation    | 20/905 | 164/18866 | 0.000119 | 0.000506 | 0.000266 | TMSB4X/TG  |
| BP | GO:001991 | lipid storag  | 13/905 | 81/18866  | 0.000119 | 0.000506 | 0.000266 | IL1B/TNF/I |
| BP | GO:005127 | regulation    | 13/905 | 81/18866  | 0.000119 | 0.000506 | 0.000266 | CXCL10/CX  |
| BP | GO:000307 | renal syste   | 7/905  | 25/18866  | 0.000128 | 0.000546 | 0.000287 | F2R/F2RL1, |
| BP | GO:009720 | renal filtrat | 7/905  | 25/18866  | 0.000128 | 0.000546 | 0.000287 | F2R/F2RL1, |
| BP | GO:190580 | negative re   | 7/905  | 25/18866  | 0.000128 | 0.000546 | 0.000287 | TLR2/WNT   |
| BP | GO:004838 | retinoic aci  | 8/905  | 33/18866  | 0.000129 | 0.000549 | 0.000289 | CALR/PML,  |
| BP | GO:006118 | mammary       | 12/905 | 71/18866  | 0.000129 | 0.000549 | 0.000289 | PML/WNT5   |
| BP | GO:000220 | somatic rec   | 10/905 | 51/18866  | 0.000131 | 0.000553 | 0.000291 | TGFB1/TFR  |
| BP | GO:000220 | somatic div   | 10/905 | 51/18866  | 0.000131 | 0.000553 | 0.000291 | TGFB1/TFR  |
| BP | GO:004519 | isotype swi   | 10/905 | 51/18866  | 0.000131 | 0.000553 | 0.000291 | TGFB1/TFR  |
| BP | GO:007208 | stem cell p   | 17/905 | 128/18866 | 0.000133 | 0.000563 | 0.000296 | VEGFA/EIF  |
| BP | GO:003114 | SCF-depen     | 14/905 | 93/18866  | 0.000134 | 0.000566 | 0.000297 | PSMB8/PSI  |
| BP | GO:190303 | negative re   | 14/905 | 93/18866  | 0.000134 | 0.000566 | 0.000297 | PLAU/TNF/  |
| BP | GO:009030 | positive re   | 11/905 | 61/18866  | 0.000135 | 0.000568 | 0.000299 | DUOX1/DL   |
| BP | GO:002195 | central ner   | 13/905 | 82/18866  | 0.000135 | 0.000569 | 0.000299 | HSP90AA1,  |
| BP | GO:007023 | positive re   | 6/905  | 18/18866  | 0.000135 | 0.000569 | 0.000299 | IDO1/CCL5  |
| BP | GO:007160 | monocyte      | 6/905  | 18/18866  | 0.000135 | 0.000569 | 0.000299 | IL1B/APOD  |
| BP | GO:007163 | regulation    | 6/905  | 18/18866  | 0.000135 | 0.000569 | 0.000299 | IL1B/APOD  |
| BP | GO:015007 | positive re   | 6/905  | 18/18866  | 0.000135 | 0.000569 | 0.000299 | IL1B/TNF/C |
| BP | GO:005089 | cognition     | 30/905 | 302/18866 | 0.000137 | 0.000575 | 0.000302 | B2M/S100I  |
| BP | GO:007121 | cellular res  | 32/905 | 331/18866 | 0.000138 | 0.000578 | 0.000304 | HSPA5/REL  |
| BP | GO:010400 | cellular res  | 32/905 | 331/18866 | 0.000138 | 0.000578 | 0.000304 | HSPA5/REL  |
| BP | GO:004592 | positive re   | 28/905 | 274/18866 | 0.00014  | 0.000587 | 0.000309 | PSMD10/C   |
| BP | GO:000940 | response tr   | 20/905 | 166/18866 | 0.00014  | 0.000587 | 0.000309 | HSPA2/HSF  |
| BP | GO:000858 | male gonad    | 18/905 | 141/18866 | 0.000143 | 0.000597 | 0.000314 | ICAM1/TLR  |
| BP | GO:190332 | positive re   | 18/905 | 141/18866 | 0.000143 | 0.000597 | 0.000314 | HSPA5/PSM  |
| BP | GO:004407 | regulation    | 15/905 | 105/18866 | 0.000143 | 0.000597 | 0.000314 | IL1B/FABP3 |
| BP | GO:004825 | regulation    | 15/905 | 105/18866 | 0.000143 | 0.000597 | 0.000314 | B2M/VEGF   |
| BP | GO:003028 | bone mine     | 16/905 | 117/18866 | 0.000147 | 0.000613 | 0.000322 | TGFB1/LTF  |
| BP | GO:190442 | positive re   | 12/905 | 72/18866  | 0.000149 | 0.00062  | 0.000326 | HSPA2/CXC  |
| BP | GO:001097 | negative re   | 19/905 | 154/18866 | 0.000149 | 0.00062  | 0.000326 | B2M/WNT1   |
| BP | GO:006135 | neural prec   | 19/905 | 154/18866 | 0.000149 | 0.00062  | 0.000326 | FABP7/VEG  |

|    |                             |           |          |          |          |            |
|----|-----------------------------|-----------|----------|----------|----------|------------|
| BP | GO:000251T cell toler:5/905 | 12/18866  | 0.00015  | 0.000622 | 0.000327 | HLA-B/HLA  |
| BP | GO:000273regulation 5/905   | 12/18866  | 0.00015  | 0.000622 | 0.000327 | DDX58/TLF  |
| BP | GO:003249response to5/905   | 12/18866  | 0.00015  | 0.000622 | 0.000327 | IRF5/C5AR  |
| BP | GO:006151macrophag5/905     | 12/18866  | 0.00015  | 0.000622 | 0.000327 | MAPK3/PT   |
| BP | GO:007049thrombin-e5/905    | 12/18866  | 0.00015  | 0.000622 | 0.000327 | F2R/F2RL1, |
| BP | GO:200024positive re13/905  | 83/18866  | 0.000153 | 0.000634 | 0.000333 | DEFB1/VEG  |
| BP | GO:001088regulation 10/905  | 52/18866  | 0.000155 | 0.000641 | 0.000337 | TNF/ITGAV  |
| BP | GO:005099regulation 10/905  | 52/18866  | 0.000155 | 0.000641 | 0.000337 | HSP90AA1,  |
| BP | GO:004654developme18/905    | 142/18866 | 0.000156 | 0.000646 | 0.00034  | ICAM1/TLR  |
| BP | GO:190458regulation 11/905  | 62/18866  | 0.000157 | 0.000647 | 0.00034  | HSP90AB1,  |
| BP | GO:003214activation 8/905   | 34/18866  | 0.000162 | 0.000667 | 0.000351 | WNT5A/SR   |
| BP | GO:004564positive re8/905   | 34/18866  | 0.000162 | 0.000667 | 0.000351 | STAT1/ISG: |
| BP | GO:005071positive re8/905   | 34/18866  | 0.000162 | 0.000667 | 0.000351 | IFNG/IRF3/ |
| BP | GO:006138heart trabe8/905   | 34/18866  | 0.000162 | 0.000667 | 0.000351 | RBP4/DLL4  |
| BP | GO:000756cell aging 16/905  | 118/18866 | 0.000163 | 0.000669 | 0.000352 | B2M/CALR,  |
| BP | GO:004593positive re20/905  | 168/18866 | 0.000165 | 0.000679 | 0.000357 | HSPA2/IL1I |
| BP | GO:004316proteasom38/905    | 424/18866 | 0.000168 | 0.000689 | 0.000362 | HSPA5/HSF  |
| BP | GO:000308regulation 7/905   | 26/18866  | 0.000168 | 0.00069  | 0.000363 | CTSG/F2R/  |
| BP | GO:003411regulation 7/905   | 26/18866  | 0.000168 | 0.00069  | 0.000363 | IL1B/TNF/A |
| BP | GO:190073regulation 7/905   | 26/18866  | 0.000168 | 0.00069  | 0.000363 | GZMB/BID,  |
| BP | GO:190074positive re7/905   | 26/18866  | 0.000168 | 0.00069  | 0.000363 | GZMB/BID,  |
| BP | GO:000307regulation 14/905  | 95/18866  | 0.000169 | 0.00069  | 0.000363 | CTSG/F2R/  |
| BP | GO:007016regulation 14/905  | 95/18866  | 0.000169 | 0.00069  | 0.000363 | TGFB1/LTF  |
| BP | GO:011014regulation 14/905  | 95/18866  | 0.000169 | 0.00069  | 0.000363 | TGFB1/LTF  |
| BP | GO:004591positive re13/905  | 84/18866  | 0.000173 | 0.000708 | 0.000372 | IFNG/SRC/I |
| BP | GO:004348regulation 22/905  | 195/18866 | 0.000175 | 0.000716 | 0.000376 | PSMB8/PSI  |
| BP | GO:190186regulation 19/905  | 156/18866 | 0.000177 | 0.000721 | 0.000379 | S100B/TGF  |
| BP | GO:004410cellular am17/905  | 131/18866 | 0.000177 | 0.000722 | 0.000379 | PSMB8/PSI  |
| BP | GO:005115regulation 16/905  | 119/18866 | 0.00018  | 0.000731 | 0.000384 | CXCL10/CX  |
| BP | GO:005160protein ma29/905   | 293/18866 | 0.000187 | 0.000761 | 0.0004   | CALR/CTSL, |
| BP | GO:001648protein prc24/905  | 223/18866 | 0.000188 | 0.000766 | 0.000403 | CTSL/PLAU  |
| BP | GO:001097negative re14/905  | 96/18866  | 0.000189 | 0.000768 | 0.000404 | PSMB8/PSI  |
| BP | GO:001074positive re6/905   | 19/18866  | 0.00019  | 0.000768 | 0.000404 | PLA2G2A/N  |
| BP | GO:004509regulation 6/905   | 19/18866  | 0.00019  | 0.000768 | 0.000404 | CXCL8/APC  |
| BP | GO:004578positive re6/905   | 19/18866  | 0.00019  | 0.000768 | 0.000404 | TFRC/TNFS  |
| BP | GO:004685positive re6/905   | 19/18866  | 0.00019  | 0.000768 | 0.000404 | TFRC/TNFS  |
| BP | GO:190042regulation 6/905   | 19/18866  | 0.00019  | 0.000768 | 0.000404 | F2RL1/SPIB |
| BP | GO:005134negative re41/905  | 473/18866 | 0.000193 | 0.00078  | 0.00041  | SLPI/WFDC  |
| BP | GO:004217regulation 36/905  | 397/18866 | 0.000196 | 0.000793 | 0.000417 | HSP90AA1,  |
| BP | GO:000610regulation 23/905  | 210/18866 | 0.000197 | 0.000794 | 0.000417 | IFNG/TGFB  |
| BP | GO:000206chondrocyt15/905   | 108/18866 | 0.000197 | 0.000794 | 0.000417 | TGFB1/BM   |
| BP | GO:000859regulation 15/905  | 108/18866 | 0.000197 | 0.000794 | 0.000417 | SRC/DLL4/, |
| BP | GO:190275negative re15/905  | 108/18866 | 0.000197 | 0.000794 | 0.000417 | PSMB8/PSI  |
| BP | GO:003631response to8/905   | 35/18866  | 0.000201 | 0.00081  | 0.000426 | TGFB1/CCL  |
| BP | GO:190103positive re8/905   | 35/18866  | 0.000201 | 0.00081  | 0.000426 | GSK3B/GZI  |
| BP | GO:000974response to22/905  | 197/18866 | 0.000203 | 0.000817 | 0.000429 | ICAM1/NO   |
| BP | GO:000173morphoger18/905    | 145/18866 | 0.000204 | 0.000819 | 0.000431 | PSMB8/PSI  |
| BP | GO:003085regulation 20/905  | 171/18866 | 0.00021  | 0.000843 | 0.000443 | CTSL/IFNG, |
| BP | GO:200017positive re10/905  | 54/18866  | 0.000215 | 0.000861 | 0.000453 | VEGFA/DLL  |
| BP | GO:009028regulation 30/905  | 310/18866 | 0.000216 | 0.000868 | 0.000456 | HSPA5/HSF  |

|    |                         |        |           |          |          |          |            |
|----|-------------------------|--------|-----------|----------|----------|----------|------------|
| BP | GO:003195 positive re   | 7/905  | 27/18866  | 0.000218 | 0.000871 | 0.000458 | VEGFA/SRC  |
| BP | GO:003285 negative re   | 7/905  | 27/18866  | 0.000218 | 0.000871 | 0.000458 | CCL5/CCL4  |
| BP | GO:003603 CD8-positi    | 7/905  | 27/18866  | 0.000218 | 0.000871 | 0.000458 | HLA-A/XCL  |
| BP | GO:200035 positive re   | 7/905  | 27/18866  | 0.000218 | 0.000871 | 0.000458 | HLA-G/CD4  |
| BP | GO:000206 columnar/c    | 16/905 | 121/18866 | 0.000218 | 0.000872 | 0.000458 | WNT5A/SR   |
| BP | GO:003166 cellular res  | 26/905 | 253/18866 | 0.000219 | 0.000873 | 0.000459 | HSPA5/ICA  |
| BP | GO:004544 myoblast d    | 13/905 | 86/18866  | 0.000221 | 0.00088  | 0.000462 | CXCL14/CX  |
| BP | GO:000237 dendritic c   | 5/905  | 13/18866  | 0.000234 | 0.000927 | 0.000487 | DDX58/TLF  |
| BP | GO:003065 regulation    | 5/905  | 13/18866  | 0.000234 | 0.000927 | 0.000487 | IFNG/IL1B/ |
| BP | GO:003272 positive re   | 5/905  | 13/18866  | 0.000234 | 0.000927 | 0.000487 | IL1B/PAEP/ |
| BP | GO:003282 regulation    | 5/905  | 13/18866  | 0.000234 | 0.000927 | 0.000487 | PGLYRP1/P  |
| BP | GO:003800 netrin-acti   | 5/905  | 13/18866  | 0.000234 | 0.000927 | 0.000487 | PTK2/TUBE  |
| BP | GO:004574 positive re   | 5/905  | 13/18866  | 0.000234 | 0.000927 | 0.000487 | AREG/BTC/  |
| BP | GO:006010 positive re   | 5/905  | 13/18866  | 0.000234 | 0.000927 | 0.000487 | F2RL1/PPA  |
| BP | GO:007268 T cell extra  | 5/905  | 13/18866  | 0.000234 | 0.000927 | 0.000487 | ICAM1/CCL  |
| BP | GO:190515 positive re   | 5/905  | 13/18866  | 0.000234 | 0.000927 | 0.000487 | F2RL1/PPA  |
| BP | GO:200015 regulation    | 5/905  | 13/18866  | 0.000234 | 0.000927 | 0.000487 | SRC/AMH/   |
| BP | GO:005081 regulation    | 14/905 | 98/18866  | 0.000236 | 0.000933 | 0.00049  | IFNG/NFYA  |
| BP | GO:200124 negative re   | 14/905 | 98/18866  | 0.000236 | 0.000933 | 0.00049  | CXCL12/MI  |
| BP | GO:003410 positive re   | 9/905  | 45/18866  | 0.000241 | 0.000952 | 0.0005   | TFRC/IL15/ |
| BP | GO:004348 regulation    | 21/905 | 186/18866 | 0.000242 | 0.000954 | 0.000501 | PSMB8/PSI  |
| BP | GO:007058 calcium ior   | 30/905 | 312/18866 | 0.000242 | 0.000954 | 0.000501 | HSPA2/CXC  |
| BP | GO:003007 insulin secr  | 23/905 | 213/18866 | 0.000242 | 0.000954 | 0.000502 | IFNG/IL1B/ |
| BP | GO:000718 adenylate c   | 18/905 | 147/18866 | 0.000242 | 0.000955 | 0.000502 | CXCL10/CX  |
| BP | GO:007140 cellular res  | 8/905  | 36/18866  | 0.000248 | 0.000975 | 0.000512 | FCER1G/PF  |
| BP | GO:190105 negative re   | 8/905  | 36/18866  | 0.000248 | 0.000975 | 0.000512 | IL1B/TNF/I |
| BP | GO:200124 negative re   | 8/905  | 36/18866  | 0.000248 | 0.000975 | 0.000512 | IL1B/TNF/I |
| BP | GO:000194 hair follicle | 13/905 | 87/18866  | 0.000248 | 0.000975 | 0.000512 | TNF/WNT5   |
| BP | GO:000195 positive re   | 10/905 | 55/18866  | 0.000251 | 0.000986 | 0.000518 | VEGFA/LIV  |
| BP | GO:007074 response tr   | 10/905 | 55/18866  | 0.000251 | 0.000986 | 0.000518 | ICAM1/STA  |
| BP | GO:003355 multicellul   | 12/905 | 76/18866  | 0.000252 | 0.000986 | 0.000518 | IDO1/NOS:  |
| BP | GO:005080 synapse or    | 38/905 | 433/18866 | 0.000256 | 0.001001 | 0.000526 | TLR2/TNF/I |
| BP | GO:000257 regulation    | 6/905  | 20/18866  | 0.00026  | 0.001013 | 0.000533 | HLA-DOB/S  |
| BP | GO:000725 I-kappaB pl   | 6/905  | 20/18866  | 0.00026  | 0.001013 | 0.000533 | TLR2/TNF/  |
| BP | GO:003230 regulation    | 6/905  | 20/18866  | 0.00026  | 0.001013 | 0.000533 | IL1B/TNFSF |
| BP | GO:003233 positive re   | 6/905  | 20/18866  | 0.00026  | 0.001013 | 0.000533 | FGF18/GDF  |
| BP | GO:003245 response tr   | 6/905  | 20/18866  | 0.00026  | 0.001013 | 0.000533 | TNFAIP3/IF |
| BP | GO:003969 single strar  | 6/905  | 20/18866  | 0.00026  | 0.001013 | 0.000533 | CXCL8/APC  |
| BP | GO:190593 regulation    | 6/905  | 20/18866  | 0.00026  | 0.001013 | 0.000533 | SRC/SEMA:  |
| BP | GO:009027 positive re   | 14/905 | 99/18866  | 0.000263 | 0.001024 | 0.000538 | RBP4/TFR2  |
| BP | GO:009025 regulation    | 26/905 | 256/18866 | 0.000263 | 0.001025 | 0.000539 | F2R/PTGS2  |
| BP | GO:001067 regulation    | 18/905 | 148/18866 | 0.000264 | 0.001026 | 0.000539 | ADIPOQ/SF  |
| BP | GO:000701 actin filam   | 38/905 | 434/18866 | 0.000268 | 0.00104  | 0.000547 | ICAM1/CXC  |
| BP | GO:001644 somatic div   | 11/905 | 66/18866  | 0.000278 | 0.001079 | 0.000567 | TGFB1/TFR  |
| BP | GO:004390 negative re   | 7/905  | 28/18866  | 0.000279 | 0.00108  | 0.000567 | CALR/PAEP  |
| BP | GO:009020 positive re   | 7/905  | 28/18866  | 0.000279 | 0.00108  | 0.000567 | MMP9/TNI   |
| BP | GO:200015 regulation    | 7/905  | 28/18866  | 0.000279 | 0.00108  | 0.000567 | IL1B/FABP: |
| BP | GO:003257 response tr   | 9/905  | 46/18866  | 0.000287 | 0.001111 | 0.000584 | TGFB1/TLR  |
| BP | GO:005110 regulation    | 16/905 | 124/18866 | 0.00029  | 0.001123 | 0.00059  | IFNG/TMSE  |
| BP | GO:001033 response tr   | 10/905 | 56/18866  | 0.000293 | 0.001132 | 0.000595 | HSPA5/CXC  |

|    |                                  |        |           |          |          |          |            |
|----|----------------------------------|--------|-----------|----------|----------|----------|------------|
| BP | GO:001046 negative regulation of | 27/905 | 272/18866 | 0.000293 | 0.001132 | 0.000595 | SLPI/WFDC  |
| BP | GO:004682 regulation of          | 15/905 | 112/18866 | 0.000295 | 0.001141 | 0.000599 | HSP90AB1,  |
| BP | GO:001095 negative regulation of | 26/905 | 258/18866 | 0.000298 | 0.001148 | 0.000603 | SLPI/WFDC  |
| BP | GO:001049 proteasome             | 41/905 | 483/18866 | 0.000299 | 0.001151 | 0.000605 | HSPA5/HSF  |
| BP | GO:005149 positive regulation of | 24/905 | 230/18866 | 0.0003   | 0.001155 | 0.000607 | ICAM1/NO   |
| BP | GO:004354 positive regulation of | 36/905 | 406/18866 | 0.000302 | 0.001164 | 0.000612 | ICAM1/CXC  |
| BP | GO:004519 regulation of          | 8/905  | 37/18866  | 0.000303 | 0.001166 | 0.000613 | TGFB1/TFR  |
| BP | GO:003227 positive regulation of | 17/905 | 137/18866 | 0.000305 | 0.001171 | 0.000615 | HSP90AA1,  |
| BP | GO:000189 embryonic              | 13/905 | 89/18866  | 0.000312 | 0.001198 | 0.000629 | SOCS3/IL1C |
| BP | GO:002240 molting cycle          | 13/905 | 89/18866  | 0.000312 | 0.001198 | 0.000629 | TNF/WNT5   |
| BP | GO:002240 hair cycle             | 13/905 | 89/18866  | 0.000312 | 0.001198 | 0.000629 | TNF/WNT5   |
| BP | GO:001050 regulation of          | 32/905 | 347/18866 | 0.000324 | 0.00124  | 0.000652 | IFNG/MAPK  |
| BP | GO:001921 regulation of          | 14/905 | 101/18866 | 0.000325 | 0.001244 | 0.000654 | IL1B/FABP5 |
| BP | GO:003582 modulation of          | 15/905 | 113/18866 | 0.000326 | 0.001247 | 0.000656 | CD4/SLPI/S |
| BP | GO:003032 lung development       | 20/905 | 177/18866 | 0.000333 | 0.001273 | 0.000669 | RBP4/TNF/  |
| BP | GO:003556 non-canonical          | 18/905 | 151/18866 | 0.000338 | 0.001293 | 0.00068  | PSMB8/PSI  |
| BP | GO:000762 circadian rhythm       | 23/905 | 218/18866 | 0.000339 | 0.001295 | 0.000681 | RELB/PTGC  |
| BP | GO:004880 genitalia development  | 9/905  | 47/18866  | 0.00034  | 0.001296 | 0.000681 | RBP4/WNT   |
| BP | GO:006098 endocrine              | 19/905 | 47/18866  | 0.00034  | 0.001296 | 0.000681 | IL1B/AGT/  |
| BP | GO:009917 regulation of          | 39/905 | 455/18866 | 0.000343 | 0.001307 | 0.000687 | S100B/IL1E |
| BP | GO:009877 skin epidermal         | 13/905 | 90/18866  | 0.000349 | 0.001323 | 0.000695 | TNF/WNT5   |
| BP | GO:000269 positive regulation of | 6/905  | 21/18866  | 0.000349 | 0.001323 | 0.000695 | ICAM1/AGI  |
| BP | GO:001089 positive regulation of | 6/905  | 21/18866  | 0.000349 | 0.001323 | 0.000695 | IFNG/IL1B/ |
| BP | GO:003581 regulation of          | 6/905  | 21/18866  | 0.000349 | 0.001323 | 0.000695 | EDNRB/AG   |
| BP | GO:007211 cell proliferation     | 6/905  | 21/18866  | 0.000349 | 0.001323 | 0.000695 | STAT1/PDC  |
| BP | GO:000282 negative regulation of | 5/905  | 14/18866  | 0.00035  | 0.001323 | 0.000695 | IFNL1/ARG  |
| BP | GO:001083 positive regulation of | 5/905  | 14/18866  | 0.00035  | 0.001323 | 0.000695 | FGF10/ARE  |
| BP | GO:003461 response to            | 5/905  | 14/18866  | 0.00035  | 0.001323 | 0.000695 | TGFB3/ABC  |
| BP | GO:003579 platelet-derived       | 5/905  | 14/18866  | 0.00035  | 0.001323 | 0.000695 | SRC/PDGFF  |
| BP | GO:005170 regulation of          | 5/905  | 14/18866  | 0.00035  | 0.001323 | 0.000695 | IFNG/F2RL1 |
| BP | GO:007023 positive regulation of | 5/905  | 14/18866  | 0.00035  | 0.001323 | 0.000695 | IDO1/CCL5  |
| BP | GO:005090 leukocyte              | 7/905  | 29/18866  | 0.000352 | 0.00133  | 0.000699 | CXCL12/TN  |
| BP | GO:200072 positive regulation of | 7/905  | 29/18866  | 0.000352 | 0.00133  | 0.000699 | TGFB1/GRI  |
| BP | GO:004244 hormone binding        | 11/905 | 68/18866  | 0.000364 | 0.001372 | 0.000721 | DUOX1/DU   |
| BP | GO:000183 epithelial             | 18/905 | 152/18866 | 0.000367 | 0.001384 | 0.000727 | TGFB1/IL1E |
| BP | GO:004592 positive regulation of | 8/905  | 38/18866  | 0.000368 | 0.001386 | 0.000728 | IL1B/ADIPC |
| BP | GO:007139 cellular response      | 8/905  | 38/18866  | 0.000368 | 0.001386 | 0.000728 | IL10/EGFR/ |
| BP | GO:190018 regulation of          | 16/905 | 127/18866 | 0.000382 | 0.001436 | 0.000755 | HSP90AB1,  |
| BP | GO:200017 regulation of          | 13/905 | 91/18866  | 0.00039  | 0.001466 | 0.000771 | VEGFA/WN   |
| BP | GO:003163 zymogen activation     | 10/905 | 58/18866  | 0.000394 | 0.00148  | 0.000778 | CTSL/PLAU  |
| BP | GO:000930 amine metabolism       | 17/905 | 140/18866 | 0.000394 | 0.00148  | 0.000778 | PSMB8/PSI  |
| BP | GO:001620 regulation of          | 18/905 | 153/18866 | 0.000398 | 0.001492 | 0.000784 | S100B/TGF  |
| BP | GO:007177 response to            | 18/905 | 153/18866 | 0.000398 | 0.001492 | 0.000784 | CXCL8/CXC  |
| BP | GO:004222 response to            | 9/905  | 48/18866  | 0.000401 | 0.001501 | 0.000789 | HSPA5/HSF  |
| BP | GO:200123 regulation of          | 9/905  | 48/18866  | 0.000401 | 0.001501 | 0.000789 | IL1B/TNF/I |
| BP | GO:005085 regulation of          | 11/905 | 69/18866  | 0.000414 | 0.00155  | 0.000815 | CCR7/CAR   |
| BP | GO:000151 prostaglandin          | 7/905  | 30/18866  | 0.000441 | 0.001643 | 0.000864 | PTGDS/IL1I |
| BP | GO:000184 protein inhibition     | 7/905  | 30/18866  | 0.000441 | 0.001643 | 0.000864 | GZMB/BID,  |
| BP | GO:003506 positive regulation of | 7/905  | 30/18866  | 0.000441 | 0.001643 | 0.000864 | IL1B/MAPK  |
| BP | GO:004645 prostanoid             | 7/905  | 30/18866  | 0.000441 | 0.001643 | 0.000864 | PTGDS/IL1I |

|    |           |              |        |           |          |          |          |            |
|----|-----------|--------------|--------|-----------|----------|----------|----------|------------|
| BP | GO:006014 | regulation   | 7/905  | 30/18866  | 0.000441 | 0.001643 | 0.000864 | CXCL10/CX  |
| BP | GO:004327 | response to  | 14/905 | 104/18866 | 0.000441 | 0.001643 | 0.000864 | HSPA5/HSF  |
| BP | GO:003032 | respiratory  | 20/905 | 181/18866 | 0.000446 | 0.001661 | 0.000873 | RBP4/TNF/  |
| BP | GO:004545 | cell redox   | 10/905 | 59/18866  | 0.000454 | 0.00169  | 0.000888 | PDIA3/PDI/ |
| BP | GO:000257 | platelet de  | 16/905 | 129/18866 | 0.000455 | 0.001694 | 0.00089  | FCER1G/TM  |
| BP | GO:000721 | Notch sign   | 21/905 | 195/18866 | 0.000459 | 0.001707 | 0.000897 | STAT1/SRC  |
| BP | GO:003580 | regulation   | 6/905  | 22/18866  | 0.000461 | 0.00171  | 0.000899 | EDNRB/AD   |
| BP | GO:004562 | positive re  | 6/905  | 22/18866  | 0.000461 | 0.00171  | 0.000899 | TNFSF4/CD  |
| BP | GO:007135 | cellular res | 6/905  | 22/18866  | 0.000461 | 0.00171  | 0.000899 | DDX58/IRF  |
| BP | GO:007207 | kidney epit  | 17/905 | 142/18866 | 0.000465 | 0.001725 | 0.000907 | ADIPOQ/S1  |
| BP | GO:001071 | regulation   | 9/905  | 49/18866  | 0.00047  | 0.00174  | 0.000914 | TGFB1/F2R  |
| BP | GO:004205 | negative re  | 9/905  | 49/18866  | 0.00047  | 0.00174  | 0.000914 | AREG/BTC/  |
| BP | GO:006138 | trabecula r  | 9/905  | 49/18866  | 0.00047  | 0.00174  | 0.000914 | RBP4/DLL4  |
| BP | GO:009028 | negative re  | 20/905 | 182/18866 | 0.000479 | 0.00177  | 0.00093  | HSPA5/CXC  |
| BP | GO:001076 | positive re  | 5/905  | 15/18866  | 0.000504 | 0.001856 | 0.000975 | TGFB1/PTK  |
| BP | GO:003264 | regulation   | 5/905  | 15/18866  | 0.000504 | 0.001856 | 0.000975 | IL1B/PAEP/ |
| BP | GO:004440 | adhesion o   | 5/905  | 15/18866  | 0.000504 | 0.001856 | 0.000975 | HSP90AB1/  |
| BP | GO:004484 | estrous cyc  | 5/905  | 15/18866  | 0.000504 | 0.001856 | 0.000975 | GNRH1/MI   |
| BP | GO:004565 | positive re  | 5/905  | 15/18866  | 0.000504 | 0.001856 | 0.000975 | TGFB1/IL34 |
| BP | GO:190218 | negative re  | 5/905  | 15/18866  | 0.000504 | 0.001856 | 0.000975 | PML/TRIM1  |
| BP | GO:007200 | nephron de   | 17/905 | 143/18866 | 0.000505 | 0.001858 | 0.000977 | ADIPOQ/S1  |
| BP | GO:003444 | substrate a  | 14/905 | 106/18866 | 0.000537 | 0.001972 | 0.001036 | CALR/ITGA  |
| BP | GO:001066 | regulation   | 13/905 | 94/18866  | 0.000537 | 0.001972 | 0.001036 | IFNG/ARRE  |
| BP | GO:000323 | cardiac ver  | 16/905 | 131/18866 | 0.000541 | 0.001987 | 0.001044 | TGFB1/WN   |
| BP | GO:004863 | regulation   | 18/905 | 157/18866 | 0.000544 | 0.001996 | 0.001049 | S100B/TGF  |
| BP | GO:003436 | protein-lipi | 7/905  | 31/18866  | 0.000546 | 0.001998 | 0.00105  | CETP/PLA2  |
| BP | GO:003436 | plasma lipc  | 7/905  | 31/18866  | 0.000546 | 0.001998 | 0.00105  | CETP/PLA2  |
| BP | GO:007253 | T-helper 1   | 7/905  | 31/18866  | 0.000546 | 0.001998 | 0.00105  | IL23A/IL12 |
| BP | GO:004361 | keratinocy   | 19/905 | 50/18866  | 0.00055  | 0.002011 | 0.001057 | VDR/FGF10  |
| BP | GO:003286 | cellular res | 23/905 | 226/18866 | 0.000565 | 0.002068 | 0.001087 | IL1B/ADIPC |
| BP | GO:007132 | cellular res | 17/905 | 145/18866 | 0.000593 | 0.002168 | 0.00114  | ICAM1/NO   |
| BP | GO:003581 | renal sodiu  | 6/905  | 23/18866  | 0.000599 | 0.002182 | 0.001147 | EDNRB/AG   |
| BP | GO:006054 | negative re  | 6/905  | 23/18866  | 0.000599 | 0.002182 | 0.001147 | UCN/FADD   |
| BP | GO:007140 | cellular res | 6/905  | 23/18866  | 0.000599 | 0.002182 | 0.001147 | FCER1G/PF  |
| BP | GO:190001 | positive re  | 6/905  | 23/18866  | 0.000599 | 0.002182 | 0.001147 | TNF/IL17D, |
| BP | GO:200082 | regulation   | 8/905  | 41/18866  | 0.000633 | 0.002306 | 0.001212 | WNT5A/SE   |
| BP | GO:003808 | vascular en  | 9/905  | 51/18866  | 0.000639 | 0.002322 | 0.00122  | VEGFA/PDC  |
| BP | GO:006097 | coronary v:  | 9/905  | 51/18866  | 0.000639 | 0.002322 | 0.00122  | VEGFA/PDC  |
| BP | GO:007135 | cellular res | 9/905  | 51/18866  | 0.000639 | 0.002322 | 0.00122  | ICAM1/STA  |
| BP | GO:007182 | plasma lipc  | 9/905  | 51/18866  | 0.000639 | 0.002322 | 0.00122  | CETP/PLA2  |
| BP | GO:005080 | modulator    | 38/905 | 454/18866 | 0.00064  | 0.002323 | 0.001221 | S100B/IL1E |
| BP | GO:009010 | negative re  | 16/905 | 133/18866 | 0.00064  | 0.002323 | 0.001221 | HSPA5/TGF  |
| BP | GO:003462 | cellular res | 17/905 | 146/18866 | 0.000642 | 0.002327 | 0.001223 | CALR/HSPA  |
| BP | GO:004434 | cellular res | 17/905 | 146/18866 | 0.000642 | 0.002327 | 0.001223 | CXCL8/CXC  |
| BP | GO:000600 | glucose me   | 22/905 | 214/18866 | 0.000644 | 0.002331 | 0.001225 | RBP4/FABF  |
| BP | GO:000317 | aortic valv  | 7/905  | 32/18866  | 0.00067  | 0.00242  | 0.001272 | TGFB1/DLL  |
| BP | GO:003235 | regulation   | 7/905  | 32/18866  | 0.00067  | 0.00242  | 0.001272 | ADM/BMP.   |
| BP | GO:003436 | protein-coi  | 7/905  | 32/18866  | 0.00067  | 0.00242  | 0.001272 | CETP/PLA2  |
| BP | GO:004340 | negative re  | 20/905 | 187/18866 | 0.000678 | 0.002446 | 0.001286 | PSMD10/IL  |
| BP | GO:002170 | developme    | 27/905 | 287/18866 | 0.000679 | 0.002446 | 0.001286 | DEFB1/PAE  |

|    |           |              |        |           |          |          |          |             |
|----|-----------|--------------|--------|-----------|----------|----------|----------|-------------|
| BP | GO:001061 | regulation   | 11/905 | 73/18866  | 0.000679 | 0.002446 | 0.001286 | PTK2/AGT/   |
| BP | GO:005115 | positive re  | 11/905 | 73/18866  | 0.000679 | 0.002446 | 0.001286 | CXCL9/TGF   |
| BP | GO:001090 | regulation   | 15/905 | 121/18866 | 0.000682 | 0.002454 | 0.00129  | ADIPOQ/SF   |
| BP | GO:000226 | lymphocyte   | 10/905 | 62/18866  | 0.000682 | 0.002454 | 0.00129  | TNFAIP3/M   |
| BP | GO:000740 | neuroblast   | 10/905 | 62/18866  | 0.000682 | 0.002454 | 0.00129  | VEGFA/CX3   |
| BP | GO:000745 | mesoderm     | 16/905 | 134/18866 | 0.000696 | 0.0025   | 0.001314 | VEGFA/WN    |
| BP | GO:000178 | neutrophil   | 5/905  | 16/18866  | 0.000704 | 0.002521 | 0.001325 | PIK3CD/CX   |
| BP | GO:000197 | renal syste  | 5/905  | 16/18866  | 0.000704 | 0.002521 | 0.001325 | F2R/F2RL1,  |
| BP | GO:003260 | granulocyte  | 5/905  | 16/18866  | 0.000704 | 0.002521 | 0.001325 | IL1B/PAEP,  |
| BP | GO:003411 | positive re  | 5/905  | 16/18866  | 0.000704 | 0.002521 | 0.001325 | IL1B/TNF/A  |
| BP | GO:004586 | negative re  | 5/905  | 16/18866  | 0.000704 | 0.002521 | 0.001325 | APOBEC3G    |
| BP | GO:006057 | morphoger    | 5/905  | 16/18866  | 0.000704 | 0.002521 | 0.001325 | WNT5A/FC    |
| BP | GO:004368 | post-transl  | 32/905 | 363/18866 | 0.000706 | 0.002524 | 0.001327 | PSMB8/PSI   |
| BP | GO:000693 | smooth mu    | 14/905 | 109/18866 | 0.000713 | 0.002548 | 0.001339 | F2R/PTGS2   |
| BP | GO:007050 | calcium ior  | 12/905 | 85/18866  | 0.00072  | 0.00257  | 0.001351 | CXCL12/TR   |
| BP | GO:190352 | regulation   | 28/905 | 303/18866 | 0.000721 | 0.002575 | 0.001353 | ICAM1/S1C   |
| BP | GO:002153 | telencepha   | 25/905 | 259/18866 | 0.000729 | 0.002601 | 0.001367 | CXCL12/WI   |
| BP | GO:000717 | transformii  | 21/905 | 202/18866 | 0.000732 | 0.002608 | 0.001371 | HSPA5/HSF   |
| BP | GO:199008 | response tr  | 9/905  | 52/18866  | 0.000741 | 0.002639 | 0.001387 | HSPA5/MA    |
| BP | GO:190406 | regulation   | 31/905 | 349/18866 | 0.000749 | 0.002667 | 0.001402 | HSPA2/IFN   |
| BP | GO:000650 | membrane     | 8/905  | 42/18866  | 0.00075  | 0.002668 | 0.001402 | IFNG/ERAP   |
| BP | GO:000305 | glomerular   | 6/905  | 24/18866  | 0.000766 | 0.002715 | 0.001427 | F2R/F2RL1,  |
| BP | GO:001064 | regulation   | 6/905  | 24/18866  | 0.000766 | 0.002715 | 0.001427 | APOD/ADIF   |
| BP | GO:001080 | negative re  | 6/905  | 24/18866  | 0.000766 | 0.002715 | 0.001427 | ADIPOQ/F2   |
| BP | GO:001086 | regulation   | 6/905  | 24/18866  | 0.000766 | 0.002715 | 0.001427 | IFNG/ADIP   |
| BP | GO:003469 | response tr  | 6/905  | 24/18866  | 0.000766 | 0.002715 | 0.001427 | TNFSF4/CC   |
| BP | GO:006200 | secondary    | 6/905  | 24/18866  | 0.000766 | 0.002715 | 0.001427 | WNT5A/JA    |
| BP | GO:005500 | cardiac mu   | 10/905 | 63/18866  | 0.000777 | 0.00275  | 0.001445 | TGFB1/WN    |
| BP | GO:007005 | intrinsic ap | 10/905 | 63/18866  | 0.000777 | 0.00275  | 0.001445 | PML/TNFR:   |
| BP | GO:000165 | ureteric bu  | 13/905 | 98/18866  | 0.000803 | 0.002839 | 0.001492 | VEGFA/AR    |
| BP | GO:001065 | muscle cell  | 13/905 | 98/18866  | 0.000803 | 0.002839 | 0.001492 | IFNG/ARRE   |
| BP | GO:190437 | regulation   | 15/905 | 123/18866 | 0.00081  | 0.00286  | 0.001503 | IFNG/TGFB   |
| BP | GO:190336 | positive re  | 17/905 | 149/18866 | 0.00081  | 0.00286  | 0.001503 | HSP90AA1,   |
| BP | GO:004801 | neurotropt   | 7/905  | 33/18866  | 0.000816 | 0.002872 | 0.001509 | SRC/AGT/N   |
| BP | GO:006131 | cell surface | 7/905  | 33/18866  | 0.000816 | 0.002872 | 0.001509 | TGFB1/WN    |
| BP | GO:012025 | olefinic cor | 7/905  | 33/18866  | 0.000816 | 0.002872 | 0.001509 | ADM/BMP.    |
| BP | GO:200075 | positive re  | 7/905  | 33/18866  | 0.000816 | 0.002872 | 0.001509 | IL1B/MAPK   |
| BP | GO:000806 | regulation   | 20/905 | 190/18866 | 0.000829 | 0.002916 | 0.001532 | ICAM1/CXC   |
| BP | GO:003296 | collagen bi  | 9/905  | 53/18866  | 0.000855 | 0.003005 | 0.001579 | TGFB1/F2R   |
| BP | GO:004230 | molting cyc  | 14/905 | 111/18866 | 0.000856 | 0.003005 | 0.001579 | TNF/WNT5    |
| BP | GO:004263 | hair cycle   | 14/905 | 111/18866 | 0.000856 | 0.003005 | 0.001579 | TNF/WNT5    |
| BP | GO:000252 | hypersensi   | 4/905  | 10/18866  | 0.000875 | 0.003041 | 0.001598 | FCER1G/CC   |
| BP | GO:000266 | regulation   | 4/905  | 10/18866  | 0.000875 | 0.003041 | 0.001598 | HLA-B/HLA   |
| BP | GO:001088 | negative re  | 4/905  | 10/18866  | 0.000875 | 0.003041 | 0.001598 | PPARG/PPA   |
| BP | GO:003308 | regulation   | 4/905  | 10/18866  | 0.000875 | 0.003041 | 0.001598 | IL1B/IL1A/( |
| BP | GO:003413 | regulation   | 4/905  | 10/18866  | 0.000875 | 0.003041 | 0.001598 | TNFAIP3/F:  |
| BP | GO:003650 | ATF6-medi    | 4/905  | 10/18866  | 0.000875 | 0.003041 | 0.001598 | CALR/HSPA   |
| BP | GO:003953 | MDA-5 sigr   | 4/905  | 10/18866  | 0.000875 | 0.003041 | 0.001598 | IRF3/IFIH1, |
| BP | GO:004254 | hemoglobii   | 4/905  | 10/18866  | 0.000875 | 0.003041 | 0.001598 | EPO/INHA/   |
| BP | GO:004275 | drinking be  | 4/905  | 10/18866  | 0.000875 | 0.003041 | 0.001598 | AGT/APLN,   |

|    |                        |        |           |          |          |          |            |
|----|------------------------|--------|-----------|----------|----------|----------|------------|
| BP | GO:004298 sequester    | 4/905  | 10/18866  | 0.000875 | 0.003041 | 0.001598 | TMSB10/TI  |
| BP | GO:004338 regulation   | 4/905  | 10/18866  | 0.000875 | 0.003041 | 0.001598 | IFNL1/TNF  |
| BP | GO:006051 prostatic b  | 4/905  | 10/18866  | 0.000875 | 0.003041 | 0.001598 | WNT5A/FG   |
| BP | GO:007038 DNA cytos    | 4/905  | 10/18866  | 0.000875 | 0.003041 | 0.001598 | APOBEC3G   |
| BP | GO:007167 smooth m     | 4/905  | 10/18866  | 0.000875 | 0.003041 | 0.001598 | PDGFRB/M   |
| BP | GO:190042 positive re  | 4/905  | 10/18866  | 0.000875 | 0.003041 | 0.001598 | F2RL1/HAV  |
| BP | GO:200010 regulation   | 4/905  | 10/18866  | 0.000875 | 0.003041 | 0.001598 | CCL5/IRF7/ |
| BP | GO:200042 regulation   | 4/905  | 10/18866  | 0.000875 | 0.003041 | 0.001598 | CCL2/C2/C  |
| BP | GO:000195 negative re  | 8/905  | 43/18866  | 0.000883 | 0.00306  | 0.001608 | MMP12/AF   |
| BP | GO:005085 positive re  | 8/905  | 43/18866  | 0.000883 | 0.00306  | 0.001608 | CD4/TNF/C  |
| BP | GO:005085 regulation   | 8/905  | 43/18866  | 0.000883 | 0.00306  | 0.001608 | CCR7/CAR   |
| BP | GO:007216 mesoneph     | 13/905 | 99/18866  | 0.000885 | 0.00306  | 0.001608 | VEGFA/AR   |
| BP | GO:007216 mesoneph     | 13/905 | 99/18866  | 0.000885 | 0.00306  | 0.001608 | VEGFA/AR   |
| BP | GO:003083 regulation   | 20/905 | 191/18866 | 0.000885 | 0.00306  | 0.001608 | ICAM1/CXC  |
| BP | GO:003526 organ grow   | 20/905 | 191/18866 | 0.000885 | 0.00306  | 0.001608 | RBP4/PDGI  |
| BP | GO:004586 negative re  | 32/905 | 369/18866 | 0.000929 | 0.00321  | 0.001687 | HSP90AB1,  |
| BP | GO:002195 central ner  | 20/905 | 192/18866 | 0.000944 | 0.003261 | 0.001714 | B2M/HSP9   |
| BP | GO:000312 heart field  | 5/905  | 17/18866  | 0.000959 | 0.003291 | 0.00173  | WNT5A/RC   |
| BP | GO:001056 regulation   | 5/905  | 17/18866  | 0.000959 | 0.003291 | 0.00173  | ADM/BMP    |
| BP | GO:003088 negative re  | 5/905  | 17/18866  | 0.000959 | 0.003291 | 0.00173  | IL10/BTK/T |
| BP | GO:004311 positive re  | 5/905  | 17/18866  | 0.000959 | 0.003291 | 0.00173  | TGFB1/VEG  |
| BP | GO:005066 hydrogen r   | 5/905  | 17/18866  | 0.000959 | 0.003291 | 0.00173  | DUOX1/CY   |
| BP | GO:006026 regulation   | 5/905  | 17/18866  | 0.000959 | 0.003291 | 0.00173  | LBP/RAC2/  |
| BP | GO:190494 midbrain d   | 5/905  | 17/18866  | 0.000959 | 0.003291 | 0.00173  | WNT5A/DK   |
| BP | GO:200081 negative re  | 5/905  | 17/18866  | 0.000959 | 0.003291 | 0.00173  | SRC/PTK2/  |
| BP | GO:001474 regulation   | 11/905 | 76/18866  | 0.000959 | 0.003291 | 0.00173  | PTK2/AGT/  |
| BP | GO:006041 muscle tiss  | 11/905 | 76/18866  | 0.000959 | 0.003291 | 0.00173  | TGFB1/WN   |
| BP | GO:003952 RIG-I signal | 6/905  | 25/18866  | 0.000968 | 0.003312 | 0.001741 | DDX58/NL   |
| BP | GO:004566 negative re  | 6/905  | 25/18866  | 0.000968 | 0.003312 | 0.001741 | CXCL14/CX  |
| BP | GO:004663 negative re  | 6/905  | 25/18866  | 0.000968 | 0.003312 | 0.001741 | SOCS1/TNF  |
| BP | GO:190438 cellular res | 6/905  | 25/18866  | 0.000968 | 0.003312 | 0.001741 | SRC/AGT/A  |
| BP | GO:003497 response tr  | 27/905 | 294/18866 | 0.000977 | 0.003341 | 0.001756 | CALR/PDIA  |
| BP | GO:190118 negative re  | 9/905  | 54/18866  | 0.000983 | 0.003355 | 0.001763 | AREG/BTC/  |
| BP | GO:003085 granulocy    | 7/905  | 34/18866  | 0.000985 | 0.003355 | 0.001763 | ADIPOQ/C   |
| BP | GO:004327 anoikis      | 7/905  | 34/18866  | 0.000985 | 0.003355 | 0.001763 | SRC/PTK2/  |
| BP | GO:004590 positive re  | 7/905  | 34/18866  | 0.000985 | 0.003355 | 0.001763 | ICAM1/F2F  |
| BP | GO:005148 positive re  | 7/905  | 34/18866  | 0.000985 | 0.003355 | 0.001763 | F2R/F2RL1, |
| BP | GO:005509 response tr  | 7/905  | 34/18866  | 0.000985 | 0.003355 | 0.001763 | FCER1G/PF  |
| BP | GO:007010 interleukin  | 7/905  | 34/18866  | 0.000985 | 0.003355 | 0.001763 | STAT1/SOC  |
| BP | GO:000206 epithelial c | 22/905 | 221/18866 | 0.000989 | 0.003365 | 0.001768 | ICAM1/IL1  |
| BP | GO:004244 hormone n    | 22/905 | 221/18866 | 0.000989 | 0.003365 | 0.001768 | CTSB/CTSL, |
| BP | GO:190316 regulation   | 17/905 | 152/18866 | 0.001014 | 0.003448 | 0.001812 | HSPA2/CXC  |
| BP | GO:003296 regulation   | 8/905  | 44/18866  | 0.001034 | 0.003514 | 0.001847 | TGFB1/F2R  |
| BP | GO:003238 positive re  | 22/905 | 222/18866 | 0.00105  | 0.003564 | 0.001873 | HSP90AB1,  |
| BP | GO:190199 negative re  | 24/905 | 251/18866 | 0.001051 | 0.003567 | 0.001875 | PSMB8/PSI  |
| BP | GO:006101 regulation   | 21/905 | 208/18866 | 0.001067 | 0.003614 | 0.001899 | PSMB8/PSI  |
| BP | GO:190290 positive re  | 21/905 | 208/18866 | 0.001067 | 0.003614 | 0.001899 | ICAM1/NO   |
| BP | GO:003083 positive re  | 13/905 | 101/18866 | 0.001069 | 0.00362  | 0.001903 | ICAM1/TRI  |
| BP | GO:004657 regulation   | 20/905 | 194/18866 | 0.001074 | 0.003634 | 0.00191  | F2R/F2RL1, |
| BP | GO:000167 cellular glu | 17/905 | 153/18866 | 0.001091 | 0.003691 | 0.00194  | ICAM1/NO   |



|    |                                                  |           |          |          |          |             |
|----|--------------------------------------------------|-----------|----------|----------|----------|-------------|
| BP | GO:004320 response to hypoxia                    | 114/18866 | 0.001115 | 0.003768 | 0.00198  | ICAM1/TNFR  |
| BP | GO:000295 response to hypoxia                    | 55/18866  | 0.001126 | 0.003799 | 0.001997 | CX3CR1/PF4  |
| BP | GO:007182 protein-lipid metabolic process        | 55/18866  | 0.001126 | 0.003799 | 0.001997 | CETP/PLA2   |
| BP | GO:003292 circadian rhythm process               | 66/18866  | 0.001127 | 0.003799 | 0.001997 | RELB/PML/   |
| BP | GO:003435 protein localization                   | 66/18866  | 0.001127 | 0.003799 | 0.001997 | FCER1G/HSP  |
| BP | GO:190305 positive regulation of cell growth     | 127/18866 | 0.001129 | 0.003805 | 0.002    | PSMC2/PSI   |
| BP | GO:003238 regulation of gene expression          | 358/18866 | 0.001135 | 0.00382  | 0.002008 | HSP90AB1,   |
| BP | GO:000301 heart process                          | 297/18866 | 0.001136 | 0.003823 | 0.002009 | S100A1/NC   |
| BP | GO:005079 regulation of cell growth              | 181/18866 | 0.001142 | 0.003842 | 0.002019 | IFNG/IL1B/  |
| BP | GO:004350 regulation of gene expression          | 102/18866 | 0.001173 | 0.003941 | 0.002071 | PTK2/AGT/   |
| BP | GO:003435 smooth muscle cell growth              | 35/18866  | 0.001181 | 0.00396  | 0.002081 | IFNG/ARRE   |
| BP | GO:003435 regulation of gene expression          | 35/18866  | 0.001181 | 0.00396  | 0.002081 | IFNG/ARRE   |
| BP | GO:004833 mesoderm development                   | 35/18866  | 0.001181 | 0.00396  | 0.002081 | DKK1/INHE   |
| BP | GO:009875 bone cell development                  | 35/18866  | 0.001181 | 0.00396  | 0.002081 | LTF/SRC/TN  |
| BP | GO:001585 organic hydroxylation                  | 268/18866 | 0.001188 | 0.003981 | 0.002092 | FCER1G/CX   |
| BP | GO:006104 negative regulation of cell growth     | 78/18866  | 0.001194 | 0.004    | 0.002102 | PLAU/TNF/   |
| BP | GO:005120 protein import                         | 45/18866  | 0.001206 | 0.004028 | 0.002117 | HSP90AA1,   |
| BP | GO:190102 regulation of gene expression          | 45/18866  | 0.001206 | 0.004028 | 0.002117 | GSK3B/GZF   |
| BP | GO:000670 C21-steroid hormone response           | 26/18866  | 0.001207 | 0.004028 | 0.002117 | ADM/BMP     |
| BP | GO:003296 positive regulation of cell growth     | 26/18866  | 0.001207 | 0.004028 | 0.002117 | TGFB1/F2R   |
| BP | GO:004283 defense response                       | 26/18866  | 0.001207 | 0.004028 | 0.002117 | CD40/SLC1   |
| BP | GO:007201 glomerulus development                 | 26/18866  | 0.001207 | 0.004028 | 0.002117 | PDGFRB/PI   |
| BP | GO:000738 pattern specification                  | 455/18866 | 0.001263 | 0.004211 | 0.002213 | WNT5A/DL    |
| BP | GO:003289 regulation of gene expression          | 67/18866  | 0.001269 | 0.004228 | 0.002222 | IL1B/FABP   |
| BP | GO:003274 positive regulation of cell growth     | 18/18866  | 0.001276 | 0.004237 | 0.002227 | TGFB1/IL1   |
| BP | GO:003603 osteoclast development                 | 18/18866  | 0.001276 | 0.004237 | 0.002227 | LTF/SRC/TN  |
| BP | GO:004301 myeloid development                    | 18/18866  | 0.001276 | 0.004237 | 0.002227 | RELB/CSF2,  |
| BP | GO:009003 regulation of gene expression          | 18/18866  | 0.001276 | 0.004237 | 0.002227 | CD40/VEGI   |
| BP | GO:009019 positive regulation of cell growth     | 18/18866  | 0.001276 | 0.004237 | 0.002227 | VEGFA/AG    |
| BP | GO:004870 oligodendrocyte development            | 103/18866 | 0.001284 | 0.004264 | 0.002241 | TLR2/EED/I  |
| BP | GO:005073 negative regulation of cell growth     | 56/18866  | 0.001285 | 0.004265 | 0.002241 | SOCS3/SOC   |
| BP | GO:000698 response to hypoxia                    | 183/18866 | 0.001301 | 0.004315 | 0.002268 | CALR/HSPA   |
| BP | GO:005125 protein polymerization                 | 300/18866 | 0.001317 | 0.004357 | 0.00229  | HSP90AA1,   |
| BP | GO:000178 natural killer cell development        | 11/18866  | 0.001324 | 0.004357 | 0.00229  | IL15/FLT3L  |
| BP | GO:003275 positive regulation of cell growth     | 11/18866  | 0.001324 | 0.004357 | 0.00229  | IL33/CRLF2  |
| BP | GO:003307 immature T cell development            | 11/18866  | 0.001324 | 0.004357 | 0.00229  | IL1B/IL1A/( |
| BP | GO:003386 regulation of gene expression          | 11/18866  | 0.001324 | 0.004357 | 0.00229  | AGT/AGTR    |
| BP | GO:004337 memory T cell development              | 11/18866  | 0.001324 | 0.004357 | 0.00229  | IFNL1/TNFS  |
| BP | GO:005102 positive regulation of cell growth     | 11/18866  | 0.001324 | 0.004357 | 0.00229  | RBP4/TNFS   |
| BP | GO:007047 uterine smooth muscle cell development | 11/18866  | 0.001324 | 0.004357 | 0.00229  | AGT/OXT/(   |
| BP | GO:007067 response to hypoxia                    | 11/18866  | 0.001324 | 0.004357 | 0.00229  | PDGFB/IL1:  |
| BP | GO:007211 glomerular development                 | 11/18866  | 0.001324 | 0.004357 | 0.00229  | PDGFRB/PI   |
| BP | GO:009019 positive regulation of cell growth     | 11/18866  | 0.001324 | 0.004357 | 0.00229  | ADIPOQ/PI   |
| BP | GO:009071 immunological process                  | 11/18866  | 0.001324 | 0.004357 | 0.00229  | IFNL1/TNFS  |
| BP | GO:000165 metanephros development                | 91/18866  | 0.001328 | 0.004367 | 0.002295 | ADIPOQ/ST   |
| BP | GO:190074 regulation of gene expression          | 46/18866  | 0.0014   | 0.004601 | 0.002418 | IL1B/VEGF,  |
| BP | GO:004336 positive T cell development            | 36/18866  | 0.001406 | 0.004617 | 0.002427 | CTSL/IL23A  |
| BP | GO:007163 regulation of gene expression          | 36/18866  | 0.001406 | 0.004617 | 0.002427 | HSP90AB1,   |
| BP | GO:190437 positive regulation of cell growth     | 68/18866  | 0.001425 | 0.004676 | 0.002457 | IFNG/TNF/   |
| BP | GO:001810 peptidyl-threonine phosphorylation     | 117/18866 | 0.001437 | 0.004709 | 0.002475 | TGFB1/WN    |

|    |                         |        |           |          |          |          |             |
|----|-------------------------|--------|-----------|----------|----------|----------|-------------|
| BP | GO:004544 endothelia    | 14/905 | 117/18866 | 0.001437 | 0.004709 | 0.002475 | ICAM1/IL1I  |
| BP | GO:004274 hydrogen c    | 9/905  | 57/18866  | 0.001463 | 0.004783 | 0.002513 | DUOX1/CY    |
| BP | GO:004574 positive re   | 9/905  | 57/18866  | 0.001463 | 0.004783 | 0.002513 | SRC/DLL4/I  |
| BP | GO:004801 inositol ph   | 9/905  | 57/18866  | 0.001463 | 0.004783 | 0.002513 | TNF/CHP1/   |
| BP | GO:007139 cellular res  | 9/905  | 57/18866  | 0.001463 | 0.004783 | 0.002513 | SRC/TNFSF   |
| BP | GO:190018 positive re   | 11/905 | 80/18866  | 0.001475 | 0.00482  | 0.002533 | HSP90AB1,   |
| BP | GO:000156 response tr   | 6/905  | 27/18866  | 0.00149  | 0.004852 | 0.00255  | CD40/SLC1   |
| BP | GO:001071 positive re   | 6/905  | 27/18866  | 0.00149  | 0.004852 | 0.00255  | TGFB1/F2R   |
| BP | GO:003469 response tr   | 6/905  | 27/18866  | 0.00149  | 0.004852 | 0.00255  | ICAM1/INH   |
| BP | GO:006054 regulation    | 6/905  | 27/18866  | 0.00149  | 0.004852 | 0.00255  | ZBP1/FADD   |
| BP | GO:006209 regulation    | 6/905  | 27/18866  | 0.00149  | 0.004852 | 0.00255  | ZBP1/FADD   |
| BP | GO:190520 negative re   | 6/905  | 27/18866  | 0.00149  | 0.004852 | 0.00255  | BMP2/DKK    |
| BP | GO:000763 feeding bel   | 13/905 | 105/18866 | 0.001535 | 0.004991 | 0.002623 | FOS/AGT/A   |
| BP | GO:009700 regulation    | 13/905 | 105/18866 | 0.001535 | 0.004991 | 0.002623 | CETP/ADIP   |
| BP | GO:001050 positive re   | 15/905 | 131/18866 | 0.001548 | 0.005032 | 0.002644 | IFNG/MAP1   |
| BP | GO:190188 regulation    | 20/905 | 200/18866 | 0.001557 | 0.005058 | 0.002658 | TLR2/IL1B/  |
| BP | GO:005114 regulation    | 19/905 | 186/18866 | 0.001575 | 0.005113 | 0.002687 | CXCL10/CX   |
| BP | GO:005170 interaction   | 12/905 | 93/18866  | 0.001606 | 0.005211 | 0.002739 | LTF/CTSG/I  |
| BP | GO:004330 regulation    | 8/905  | 47/18866  | 0.001617 | 0.005242 | 0.002755 | FCER1G/HI   |
| BP | GO:000193 negative re   | 11/905 | 81/18866  | 0.001635 | 0.005296 | 0.002783 | TNF/STAT1   |
| BP | GO:000076 syncytium     | 9/905  | 58/18866  | 0.001659 | 0.005358 | 0.002816 | CXCL10/CX   |
| BP | GO:005105 negative re   | 9/905  | 58/18866  | 0.001659 | 0.005358 | 0.002816 | BMP2/BMI    |
| BP | GO:014025 cell-cell fus | 9/905  | 58/18866  | 0.001659 | 0.005358 | 0.002816 | CXCL10/CX   |
| BP | GO:003267 regulation    | 5/905  | 19/18866  | 0.001663 | 0.005358 | 0.002816 | IFNL1/IL33, |
| BP | GO:003318 response tr   | 5/905  | 19/18866  | 0.001663 | 0.005358 | 0.002816 | PPARG/EPC   |
| BP | GO:003439 positive re   | 5/905  | 19/18866  | 0.001663 | 0.005358 | 0.002816 | IFNG/ARRE   |
| BP | GO:003953 regulation    | 5/905  | 19/18866  | 0.001663 | 0.005358 | 0.002816 | NLRX1/DH)   |
| BP | GO:200001 positive re   | 5/905  | 19/18866  | 0.001663 | 0.005358 | 0.002816 | FCER1G/H)   |
| BP | GO:007042 nucleotide    | 7/905  | 37/18866  | 0.001664 | 0.005358 | 0.002816 | TNFAIP3/IK  |
| BP | GO:190531 semi-lunar    | 7/905  | 37/18866  | 0.001664 | 0.005358 | 0.002816 | TGFB1/DLL   |
| BP | GO:000110 response tr   | 15/905 | 132/18866 | 0.001671 | 0.00538  | 0.002827 | ICAM1/TNI   |
| BP | GO:003003 contractile   | 13/905 | 106/18866 | 0.001674 | 0.005383 | 0.002829 | NOX4/SRC,   |
| BP | GO:004314 stress fiber  | 13/905 | 106/18866 | 0.001674 | 0.005383 | 0.002829 | NOX4/SRC,   |
| BP | GO:000170 in utero en   | 32/905 | 383/18866 | 0.001703 | 0.005472 | 0.002876 | PSMC4/SO    |
| BP | GO:003227 regulation    | 22/905 | 231/18866 | 0.001753 | 0.005629 | 0.002958 | HSP90AA1,   |
| BP | GO:003083 regulation    | 18/905 | 174/18866 | 0.001795 | 0.00576  | 0.003027 | ICAM1/TM    |
| BP | GO:002261 extracellul   | 11/905 | 82/18866  | 0.001808 | 0.005795 | 0.003046 | CTSL/MMP    |
| BP | GO:190293 regulation    | 11/905 | 82/18866  | 0.001808 | 0.005795 | 0.003046 | IFNG/NFYA   |
| BP | GO:000318 aortic valve  | 6/905  | 28/18866  | 0.001821 | 0.005812 | 0.003055 | TGFB1/DLL   |
| BP | GO:004204 fluid trans   | 6/905  | 28/18866  | 0.001821 | 0.005812 | 0.003055 | AQP9/EDN    |
| BP | GO:004583 positive re   | 6/905  | 28/18866  | 0.001821 | 0.005812 | 0.003055 | TGFB1/TFR   |
| BP | GO:006014 positive re   | 6/905  | 28/18866  | 0.001821 | 0.005812 | 0.003055 | CXCL9/FLT:  |
| BP | GO:006143 renal syste   | 6/905  | 28/18866  | 0.001821 | 0.005812 | 0.003055 | PDGFRB/PI   |
| BP | GO:006144 kidney vas    | 6/905  | 28/18866  | 0.001821 | 0.005812 | 0.003055 | PDGFRB/PI   |
| BP | GO:190293 positive re   | 6/905  | 28/18866  | 0.001821 | 0.005812 | 0.003055 | IFNG/IL1B/  |
| BP | GO:007016 positive re   | 8/905  | 48/18866  | 0.00186  | 0.005931 | 0.003117 | TGFB1/LTF   |
| BP | GO:011015 positive re   | 8/905  | 48/18866  | 0.00186  | 0.005931 | 0.003117 | TGFB1/LTF   |
| BP | GO:000292 regulation    | 4/905  | 12/18866  | 0.001911 | 0.006042 | 0.003175 | LTA/TNF/P   |
| BP | GO:000621 cytidine ca   | 4/905  | 12/18866  | 0.001911 | 0.006042 | 0.003175 | APOBEC3G    |
| BP | GO:000997 cytidine de   | 4/905  | 12/18866  | 0.001911 | 0.006042 | 0.003175 | APOBEC3G    |

|    |                        |        |           |          |          |          |             |
|----|------------------------|--------|-----------|----------|----------|----------|-------------|
| BP | GO:001655 cytidine to  | 4/905  | 12/18866  | 0.001911 | 0.006042 | 0.003175 | APOBEC3G    |
| BP | GO:003135 regulation   | 4/905  | 12/18866  | 0.001911 | 0.006042 | 0.003175 | IL1B/FABP5  |
| BP | GO:003563 bone mine    | 4/905  | 12/18866  | 0.001911 | 0.006042 | 0.003175 | LTF/BMP2/   |
| BP | GO:003818 nerve grow   | 4/905  | 12/18866  | 0.001911 | 0.006042 | 0.003175 | NGF/NTF3/   |
| BP | GO:004236 vitamin D t  | 4/905  | 12/18866  | 0.001911 | 0.006042 | 0.003175 | IFNG/IL1B/  |
| BP | GO:004608 cytidine m   | 4/905  | 12/18866  | 0.001911 | 0.006042 | 0.003175 | APOBEC3G    |
| BP | GO:006035 negative re  | 4/905  | 12/18866  | 0.001911 | 0.006042 | 0.003175 | DKK1/GREI   |
| BP | GO:007024 regulation   | 4/905  | 12/18866  | 0.001911 | 0.006042 | 0.003175 | WNT5A/HI    |
| BP | GO:007163 positive re  | 4/905  | 12/18866  | 0.001911 | 0.006042 | 0.003175 | IL1B/ADIPC  |
| BP | GO:190594 positive re  | 4/905  | 12/18866  | 0.001911 | 0.006042 | 0.003175 | SRC/SEMA    |
| BP | GO:200120 regulation   | 4/905  | 12/18866  | 0.001911 | 0.006042 | 0.003175 | LTF/TNFSF   |
| BP | GO:000758 body fluid   | 12/905 | 95/18866  | 0.001932 | 0.006102 | 0.003207 | VEGFA/VDI   |
| BP | GO:005070 negative re  | 12/905 | 95/18866  | 0.001932 | 0.006102 | 0.003207 | IL1B/F2R/R  |
| BP | GO:007133 cellular res | 15/905 | 134/18866 | 0.001942 | 0.00613  | 0.003222 | ICAM1/NO    |
| BP | GO:000238 mucosal ir   | 7/905  | 38/18866  | 0.001956 | 0.00615  | 0.003232 | XLCL1/DEFB  |
| BP | GO:001066 positive re  | 7/905  | 38/18866  | 0.001956 | 0.00615  | 0.003232 | IFNG/ARRE   |
| BP | GO:003587 nucleotide   | 7/905  | 38/18866  | 0.001956 | 0.00615  | 0.003232 | TNFAIP3/IK  |
| BP | GO:004800 insulin-like | 7/905  | 38/18866  | 0.001956 | 0.00615  | 0.003232 | PIK3R1/BV   |
| BP | GO:005193 regulation   | 7/905  | 38/18866  | 0.001956 | 0.00615  | 0.003232 | FABP5/F2R   |
| BP | GO:007127 cellular res | 7/905  | 38/18866  | 0.001956 | 0.00615  | 0.003232 | MMP9/CYE    |
| BP | GO:007160 transformii  | 7/905  | 38/18866  | 0.001956 | 0.00615  | 0.003232 | HSP90AB1,   |
| BP | GO:006054 respiratory  | 20/905 | 204/18866 | 0.001973 | 0.006201 | 0.003259 | RBP4/TNF/   |
| BP | GO:004864 muscle org   | 11/905 | 83/18866  | 0.001996 | 0.006267 | 0.003294 | TGFB1/WN    |
| BP | GO:004856 digestive tr | 15/905 | 135/18866 | 0.00209  | 0.00656  | 0.003448 | CXCL8/TNF   |
| BP | GO:000694 syncytium    | 9/905  | 60/18866  | 0.002115 | 0.006628 | 0.003483 | CXCL10/CX   |
| BP | GO:200024 negative re  | 9/905  | 60/18866  | 0.002115 | 0.006628 | 0.003483 | CALR/PAEP   |
| BP | GO:000268 negative re  | 5/905  | 20/18866  | 0.002131 | 0.006628 | 0.003483 | CCL2/MIF/   |
| BP | GO:001000 cardioblast  | 5/905  | 20/18866  | 0.002131 | 0.006628 | 0.003483 | GREM1/NF    |
| BP | GO:003263 interleukin  | 5/905  | 20/18866  | 0.002131 | 0.006628 | 0.003483 | IFNL1/IL33, |
| BP | GO:004395 positive re  | 5/905  | 20/18866  | 0.002131 | 0.006628 | 0.003483 | NOS1/UCN    |
| BP | GO:006054 negative re  | 5/905  | 20/18866  | 0.002131 | 0.006628 | 0.003483 | FADD/CASI   |
| BP | GO:006205 negative re  | 5/905  | 20/18866  | 0.002131 | 0.006628 | 0.003483 | FADD/CASI   |
| BP | GO:009770 connective   | 5/905  | 20/18866  | 0.002131 | 0.006628 | 0.003483 | TGFB1/F2R   |
| BP | GO:200077 positive re  | 5/905  | 20/18866  | 0.002131 | 0.006628 | 0.003483 | B2M/HLA-C   |
| BP | GO:000206 glandular e  | 8/905  | 49/18866  | 0.002131 | 0.006628 | 0.003483 | WNT5A/GS    |
| BP | GO:000244 mast cell r  | 8/905  | 49/18866  | 0.002131 | 0.006628 | 0.003483 | FCER1G/BT   |
| BP | GO:000665 prostanoid   | 8/905  | 49/18866  | 0.002131 | 0.006628 | 0.003483 | PTGDS/IL1I  |
| BP | GO:000665 prostaglan   | 8/905  | 49/18866  | 0.002131 | 0.006628 | 0.003483 | PTGDS/IL1I  |
| BP | GO:009015 establishm   | 8/905  | 49/18866  | 0.002131 | 0.006628 | 0.003483 | HSP90AA1,   |
| BP | GO:199005 cellular res | 8/905  | 49/18866  | 0.002131 | 0.006628 | 0.003483 | HSPA5/MA    |
| BP | GO:001485 muscle hyp   | 13/905 | 109/18866 | 0.002157 | 0.006704 | 0.003523 | PTK2/AGT/   |
| BP | GO:190290 regulation   | 31/905 | 373/18866 | 0.002164 | 0.006721 | 0.003532 | ICAM1/CXC   |
| BP | GO:006151 myeloid ce   | 10/905 | 72/18866  | 0.002212 | 0.006868 | 0.003609 | TLR2/LTF/S  |
| BP | GO:007133 cellular res | 15/905 | 136/18866 | 0.002248 | 0.006974 | 0.003665 | ICAM1/NO    |
| BP | GO:000815 actin polyn  | 21/905 | 221/18866 | 0.002265 | 0.007018 | 0.003688 | ICAM1/CXC   |
| BP | GO:003166 cellular res | 21/905 | 221/18866 | 0.002265 | 0.007018 | 0.003688 | HSPA5/ICA   |
| BP | GO:001083 regulation   | 7/905  | 39/18866  | 0.002287 | 0.007067 | 0.003714 | VDR/FGF10   |
| BP | GO:003817 neurotropt   | 7/905  | 39/18866  | 0.002287 | 0.007067 | 0.003714 | SRC/AGT/N   |
| BP | GO:005193 regulation   | 7/905  | 39/18866  | 0.002287 | 0.007067 | 0.003714 | FABP5/F2R   |
| BP | GO:190470 negative re  | 7/905  | 39/18866  | 0.002287 | 0.007067 | 0.003714 | ADIPOQ/IL   |

|    |           |                      |        |           |          |          |          |             |
|----|-----------|----------------------|--------|-----------|----------|----------|----------|-------------|
| BP | GO:200024 | regulation           | 7/905  | 39/18866  | 0.002287 | 0.007067 | 0.003714 | PTK2B/HCK   |
| BP | GO:000660 | protein import       | 16/905 | 150/18866 | 0.002304 | 0.007117 | 0.00374  | HSP90AB1,   |
| BP | GO:190134 | negative regulation  | 20/905 | 207/18866 | 0.002344 | 0.007235 | 0.003802 | HLA-G/CXC   |
| BP | GO:000317 | heart valve          | 9/905  | 61/18866  | 0.002378 | 0.007314 | 0.003844 | TGFB1/DLL   |
| BP | GO:002187 | forebrain            | 9/905  | 61/18866  | 0.002378 | 0.007314 | 0.003844 | B2M/WNT1    |
| BP | GO:003361 | membrane             | 9/905  | 61/18866  | 0.002378 | 0.007314 | 0.003844 | IFNG/ERAP   |
| BP | GO:004584 | negative regulation  | 9/905  | 61/18866  | 0.002378 | 0.007314 | 0.003844 | S100B/TGF   |
| BP | GO:009034 | regulation           | 9/905  | 61/18866  | 0.002378 | 0.007314 | 0.003844 | B2M/HLA-C   |
| BP | GO:190307 | positive regulation  | 9/905  | 61/18866  | 0.002378 | 0.007314 | 0.003844 | IFNG/TNF/   |
| BP | GO:003004 | actin filament       | 19/905 | 193/18866 | 0.002409 | 0.007407 | 0.003892 | ICAM1/TM    |
| BP | GO:007132 | cellular response    | 15/905 | 137/18866 | 0.002415 | 0.007421 | 0.0039   | ICAM1/NO    |
| BP | GO:004598 | positive regulation  | 8/905  | 50/18866  | 0.002433 | 0.007458 | 0.003919 | IFNG/TMSE   |
| BP | GO:010102 | vascular endothelial | 8/905  | 50/18866  | 0.002433 | 0.007458 | 0.003919 | CCL2/PPAR   |
| BP | GO:190054 | positive regulation  | 8/905  | 50/18866  | 0.002433 | 0.007458 | 0.003919 | IFNG/TMSE   |
| BP | GO:190556 | regulation           | 8/905  | 50/18866  | 0.002433 | 0.007458 | 0.003919 | CCL2/PPAR   |
| BP | GO:004846 | cell maturation      | 18/905 | 179/18866 | 0.002455 | 0.007516 | 0.00395  | DEFB1/PAE   |
| BP | GO:000320 | cardiac ventricle    | 10/905 | 73/18866  | 0.002456 | 0.007516 | 0.00395  | TGFB1/DLL   |
| BP | GO:190374 | regulation           | 10/905 | 73/18866  | 0.002456 | 0.007516 | 0.00395  | MAPT/RAC    |
| BP | GO:001633 | morphogenesis        | 16/905 | 151/18866 | 0.002466 | 0.007543 | 0.003964 | TGFB1/WN    |
| BP | GO:004583 | negative regulation  | 12/905 | 98/18866  | 0.002519 | 0.007702 | 0.004048 | IL1B/APOD   |
| BP | GO:000726 | Ras protein          | 29/905 | 346/18866 | 0.002614 | 0.007963 | 0.004185 | F2R/F2RL1,  |
| BP | GO:003596 | cellular response    | 17/905 | 166/18866 | 0.002639 | 0.007963 | 0.004185 | CALR/HSPA   |
| BP | GO:000340 | axis elongation      | 6/905  | 30/18866  | 0.002644 | 0.007963 | 0.004185 | WNT5A/FG    |
| BP | GO:001080 | positive regulation  | 6/905  | 30/18866  | 0.002644 | 0.007963 | 0.004185 | TGFB1/WN    |
| BP | GO:003411 | regulation           | 6/905  | 30/18866  | 0.002644 | 0.007963 | 0.004185 | CCL5/TNFS   |
| BP | GO:003811 | interleukin          | 6/905  | 30/18866  | 0.002644 | 0.007963 | 0.004185 | SOCS1/IL7   |
| BP | GO:006005 | angiogenesis         | 6/905  | 30/18866  | 0.002644 | 0.007963 | 0.004185 | TNF/VEGF/   |
| BP | GO:007016 | negative regulation  | 6/905  | 30/18866  | 0.002644 | 0.007963 | 0.004185 | TGFB1/CCL   |
| BP | GO:007072 | response to          | 6/905  | 30/18866  | 0.002644 | 0.007963 | 0.004185 | TGFB1/CCL   |
| BP | GO:011015 | negative regulation  | 6/905  | 30/18866  | 0.002644 | 0.007963 | 0.004185 | TGFB1/CCL   |
| BP | GO:000243 | complement           | 4/905  | 13/18866  | 0.002656 | 0.007963 | 0.004185 | C5AR1/CM    |
| BP | GO:000283 | positive regulation  | 4/905  | 13/18866  | 0.002656 | 0.007963 | 0.004185 | MR1/IL12A   |
| BP | GO:000283 | positive regulation  | 4/905  | 13/18866  | 0.002656 | 0.007963 | 0.004185 | MR1/IL12A   |
| BP | GO:000717 | activation           | 4/905  | 13/18866  | 0.002656 | 0.007963 | 0.004185 | EGF/GREM    |
| BP | GO:000822 | opsonization         | 4/905  | 13/18866  | 0.002656 | 0.007963 | 0.004185 | LBP/PTX3/I  |
| BP | GO:001062 | programmed           | 4/905  | 13/18866  | 0.002656 | 0.007963 | 0.004185 | IL1B/IL1A/I |
| BP | GO:001626 | gap junction         | 4/905  | 13/18866  | 0.002656 | 0.007963 | 0.004185 | IL1B/AGT/C  |
| BP | GO:003235 | positive regulation  | 4/905  | 13/18866  | 0.002656 | 0.007963 | 0.004185 | ADM/PPAR    |
| BP | GO:003249 | response to          | 4/905  | 13/18866  | 0.002656 | 0.007963 | 0.004185 | TLR2/DMB    |
| BP | GO:003312 | regulation           | 4/905  | 13/18866  | 0.002656 | 0.007963 | 0.004185 | IL1B/MAPK   |
| BP | GO:003360 | positive regulation  | 4/905  | 13/18866  | 0.002656 | 0.007963 | 0.004185 | CXCL12/GC   |
| BP | GO:004230 | negative regulation  | 4/905  | 13/18866  | 0.002656 | 0.007963 | 0.004185 | APOD/CHP    |
| BP | GO:005509 | phospholipid         | 4/905  | 13/18866  | 0.002656 | 0.007963 | 0.004185 | FABP3/CET   |
| BP | GO:006060 | lateral sprout       | 4/905  | 13/18866  | 0.002656 | 0.007963 | 0.004185 | WNT5A/FG    |
| BP | GO:006104 | regulation           | 4/905  | 13/18866  | 0.002656 | 0.007963 | 0.004185 | TNF/TNFAI   |
| BP | GO:190027 | negative regulation  | 4/905  | 13/18866  | 0.002656 | 0.007963 | 0.004185 | AGER/CX3C   |
| BP | GO:190256 | regulation           | 4/905  | 13/18866  | 0.002656 | 0.007963 | 0.004185 | PLA2G2A/I   |
| BP | GO:190323 | regulation           | 4/905  | 13/18866  | 0.002656 | 0.007963 | 0.004185 | CXCL12/CC   |
| BP | GO:190397 | positive regulation  | 4/905  | 13/18866  | 0.002656 | 0.007963 | 0.004185 | CCL3/CX3C   |
| BP | GO:190459 | negative regulation  | 4/905  | 13/18866  | 0.002656 | 0.007963 | 0.004185 | APOD/CHP    |

|    |                        |        |           |          |          |          |            |
|----|------------------------|--------|-----------|----------|----------|----------|------------|
| BP | GO:200119 regulation   | 4/905  | 13/18866  | 0.002656 | 0.007963 | 0.004185 | HLA-B/HLA  |
| BP | GO:001061 positive re  | 7/905  | 40/18866  | 0.002659 | 0.007963 | 0.004185 | PTK2/AGT/  |
| BP | GO:001093 regulation   | 7/905  | 40/18866  | 0.002659 | 0.007963 | 0.004185 | UCN/ZBP1,  |
| BP | GO:001657 histone ph   | 7/905  | 40/18866  | 0.002659 | 0.007963 | 0.004185 | IL1B/MAPK  |
| BP | GO:003050 positive re  | 7/905  | 40/18866  | 0.002659 | 0.007963 | 0.004185 | TGFB1/LTF  |
| BP | GO:004230 positive re  | 7/905  | 40/18866  | 0.002659 | 0.007963 | 0.004185 | HSP90AB1,  |
| BP | GO:007221 metaneph     | 7/905  | 40/18866  | 0.002659 | 0.007963 | 0.004185 | ADIPOQ/S1  |
| BP | GO:001067 positive re  | 9/905  | 62/18866  | 0.002665 | 0.007964 | 0.004185 | SRC/IGF1/I |
| BP | GO:004863 negative re  | 9/905  | 62/18866  | 0.002665 | 0.007964 | 0.004185 | S100B/TGF  |
| BP | GO:005502 positive re  | 9/905  | 62/18866  | 0.002665 | 0.007964 | 0.004185 | TGFB1/GRE  |
| BP | GO:200124 positive re  | 9/905  | 62/18866  | 0.002665 | 0.007964 | 0.004185 | S100A9/S1  |
| BP | GO:000202 desensitiza  | 5/905  | 21/18866  | 0.002688 | 0.007978 | 0.004193 | ARRB1/ADI  |
| BP | GO:001482 phasic smo   | 5/905  | 21/18866  | 0.002688 | 0.007978 | 0.004193 | EDN3/EDN   |
| BP | GO:001655 base conve   | 5/905  | 21/18866  | 0.002688 | 0.007978 | 0.004193 | APOBEC3G   |
| BP | GO:002240 negative ac  | 5/905  | 21/18866  | 0.002688 | 0.007978 | 0.004193 | ARRB1/ADI  |
| BP | GO:003050 negative re  | 5/905  | 21/18866  | 0.002688 | 0.007978 | 0.004193 | CCL3/CCR1  |
| BP | GO:003363 positive re  | 5/905  | 21/18866  | 0.002688 | 0.007978 | 0.004193 | CXCL13/CC  |
| BP | GO:003649 PERK-medi    | 5/905  | 21/18866  | 0.002688 | 0.007978 | 0.004193 | HSPA5/CXC  |
| BP | GO:004337 negative re  | 5/905  | 21/18866  | 0.002688 | 0.007978 | 0.004193 | TNFSF4/JAI |
| BP | GO:006021 definitive h | 5/905  | 21/18866  | 0.002688 | 0.007978 | 0.004193 | ADAR/TEK/  |
| BP | GO:006104 vascular w   | 5/905  | 21/18866  | 0.002688 | 0.007978 | 0.004193 | TNF/VEGF/  |
| BP | GO:006121 positive re  | 5/905  | 21/18866  | 0.002688 | 0.007978 | 0.004193 | VEGFA/AG   |
| BP | GO:014046 integrated   | 5/905  | 21/18866  | 0.002688 | 0.007978 | 0.004193 | HSPA5/CXC  |
| BP | GO:001071 regulation   | 12/905 | 99/18866  | 0.002745 | 0.008138 | 0.004277 | TGFB1/IL1E |
| BP | GO:005181 modulatio    | 12/905 | 99/18866  | 0.002745 | 0.008138 | 0.004277 | CD4/LTF/C  |
| BP | GO:000698 ER-nucleus   | 8/905  | 51/18866  | 0.002766 | 0.008197 | 0.004308 | CALR/HSPA  |
| BP | GO:190198 negative re  | 24/905 | 270/18866 | 0.002792 | 0.008269 | 0.004346 | PSMB8/PSI  |
| BP | GO:005080 regulation   | 22/905 | 240/18866 | 0.002822 | 0.008355 | 0.004391 | TLR2/MX1,  |
| BP | GO:007189 DNA biosyr   | 19/905 | 196/18866 | 0.002866 | 0.008479 | 0.004456 | HSP90AA1,  |
| BP | GO:001821 peptidyl-th  | 14/905 | 126/18866 | 0.002898 | 0.00857  | 0.004504 | TGFB1/WN   |
| BP | GO:000225 organ or ti  | 7/905  | 41/18866  | 0.003076 | 0.009081 | 0.004773 | XLCL1/DEFB |
| BP | GO:001474 positive re  | 7/905  | 41/18866  | 0.003076 | 0.009081 | 0.004773 | PTK2/AGT/  |
| BP | GO:200000 regulation   | 7/905  | 41/18866  | 0.003076 | 0.009081 | 0.004773 | FCER1G/H   |
| BP | GO:000317 heart valve  | 8/905  | 52/18866  | 0.003135 | 0.009238 | 0.004855 | TGFB1/DLL  |
| BP | GO:003051 negative re  | 8/905  | 52/18866  | 0.003135 | 0.009238 | 0.004855 | HJV/WNT5   |
| BP | GO:003806 p38MAPK      | 8/905  | 52/18866  | 0.003135 | 0.009238 | 0.004855 | IL1B/VEGF/ |
| BP | GO:005085 negative re  | 6/905  | 31/18866  | 0.003148 | 0.009258 | 0.004865 | CD22/PTP   |
| BP | GO:006103 negative re  | 6/905  | 31/18866  | 0.003148 | 0.009258 | 0.004865 | GDF5/GREI  |
| BP | GO:190074 positive re  | 6/905  | 31/18866  | 0.003148 | 0.009258 | 0.004865 | IL1B/VEGF/ |
| BP | GO:190223 negative re  | 6/905  | 31/18866  | 0.003148 | 0.009258 | 0.004865 | CXCL12/TP  |
| BP | GO:006102 membrane     | 17/905 | 169/18866 | 0.003182 | 0.009352 | 0.004915 | CALR/CD4/  |
| BP | GO:004688 positive re  | 11/905 | 88/18866  | 0.003188 | 0.009363 | 0.004921 | IFNG/IL1B/ |
| BP | GO:000188 liver devel  | 15/905 | 141/18866 | 0.003191 | 0.009365 | 0.004922 | TNFAIP3/IL |
| BP | GO:003001 establishm   | 15/905 | 141/18866 | 0.003191 | 0.009365 | 0.004922 | HSP90AA1,  |
| BP | GO:000279 negative re  | 12/905 | 101/18866 | 0.003245 | 0.009517 | 0.005001 | IL1B/F2R/R |
| BP | GO:000328 ventricular  | 10/905 | 76/18866  | 0.003317 | 0.009712 | 0.005104 | WNT5A/LT   |
| BP | GO:007122 cellular res | 10/905 | 76/18866  | 0.003317 | 0.009712 | 0.005104 | TNF/CYBB/  |
| BP | GO:007209 regulation   | 10/905 | 76/18866  | 0.003317 | 0.009712 | 0.005104 | VEGFA/EIF  |
| BP | GO:004668 response tr  | 9/905  | 64/18866  | 0.003323 | 0.009719 | 0.005108 | B2M/MMP    |
| BP | GO:190186 negative re  | 9/905  | 64/18866  | 0.003323 | 0.009719 | 0.005108 | S100B/TGF  |

|    |           |                            |        |           |          |          |          |              |
|----|-----------|----------------------------|--------|-----------|----------|----------|----------|--------------|
| BP | GO:002305 | adaptation                 | 5/905  | 22/18866  | 0.003343 | 0.009719 | 0.005108 | ARRB1/ADIP   |
| BP | GO:003206 | regulation                 | 5/905  | 22/18866  | 0.003343 | 0.009719 | 0.005108 | OASL/OAS2    |
| BP | GO:003270 | negative regulation        | 5/905  | 22/18866  | 0.003343 | 0.009719 | 0.005108 | IFNG/TNFSF   |
| BP | GO:003953 | regulation                 | 5/905  | 22/18866  | 0.003343 | 0.009719 | 0.005108 | NLRX1/DHAP   |
| BP | GO:005076 | negative regulation        | 5/905  | 22/18866  | 0.003343 | 0.009719 | 0.005108 | TLR2/ADIP1   |
| BP | GO:005100 | positive regulation        | 5/905  | 22/18866  | 0.003343 | 0.009719 | 0.005108 | S100A1/TNFR  |
| BP | GO:005509 | response to                | 5/905  | 22/18866  | 0.003343 | 0.009719 | 0.005108 | PDGFRB/PDGFR |
| BP | GO:007137 | cellular response          | 5/905  | 22/18866  | 0.003343 | 0.009719 | 0.005108 | TNFSF4/PP2A  |
| BP | GO:009018 | regulation                 | 5/905  | 22/18866  | 0.003343 | 0.009719 | 0.005108 | VEGFA/AG1    |
| BP | GO:190173 | regulation                 | 5/905  | 22/18866  | 0.003343 | 0.009719 | 0.005108 | CXCL10/CXCL  |
| BP | GO:200031 | regulation                 | 5/905  | 22/18866  | 0.003343 | 0.009719 | 0.005108 | IL23A/IL12   |
| BP | GO:003133 | negative regulation        | 15/905 | 142/18866 | 0.003415 | 0.009923 | 0.005215 | HSPA5/TM6    |
| BP | GO:190307 | regulation                 | 12/905 | 102/18866 | 0.003521 | 0.010222 | 0.005372 | IFNG/TGFB    |
| BP | GO:200006 | positive regulation        | 12/905 | 102/18866 | 0.003521 | 0.010222 | 0.005372 | PSMD10/PSM   |
| BP | GO:004566 | regulation                 | 8/905  | 53/18866  | 0.00354  | 0.010253 | 0.005389 | CXCL14/CXCL  |
| BP | GO:004574 | negative regulation        | 8/905  | 53/18866  | 0.00354  | 0.010253 | 0.005389 | CXCL8/CCL    |
| BP | GO:200077 | regulation                 | 8/905  | 53/18866  | 0.00354  | 0.010253 | 0.005389 | B2M/HLA-D    |
| BP | GO:001090 | positive regulation        | 7/905  | 42/18866  | 0.003542 | 0.010253 | 0.005389 | SRC/IGF1/E   |
| BP | GO:190459 | positive regulation        | 7/905  | 42/18866  | 0.003542 | 0.010253 | 0.005389 | HSP90AB1,    |
| BP | GO:000330 | Wnt signaling              | 4/905  | 14/18866  | 0.003578 | 0.010287 | 0.005406 | WNT5A/BMP    |
| BP | GO:003021 | hyaluronan                 | 4/905  | 14/18866  | 0.003578 | 0.010287 | 0.005406 | TGFB1/IL1F   |
| BP | GO:003511 | genitalia morphogenesis    | 4/905  | 14/18866  | 0.003578 | 0.010287 | 0.005406 | RBP4/FGF1    |
| BP | GO:003581 | positive regulation        | 4/905  | 14/18866  | 0.003578 | 0.010287 | 0.005406 | EDNRB/AG     |
| BP | GO:004265 | regulation                 | 4/905  | 14/18866  | 0.003578 | 0.010287 | 0.005406 | WNT5A/DKK    |
| BP | GO:004392 | negative regulation        | 4/905  | 14/18866  | 0.003578 | 0.010287 | 0.005406 | CCL5/CCL4,   |
| BP | GO:004500 | DNA deamination            | 4/905  | 14/18866  | 0.003578 | 0.010287 | 0.005406 | APOBEC3G     |
| BP | GO:004559 | positive regulation        | 4/905  | 14/18866  | 0.003578 | 0.010287 | 0.005406 | HLA-G/IFN    |
| BP | GO:004613 | pyrimidine                 | 4/905  | 14/18866  | 0.003578 | 0.010287 | 0.005406 | APOBEC3G     |
| BP | GO:004613 | pyrimidine                 | 4/905  | 14/18866  | 0.003578 | 0.010287 | 0.005406 | APOBEC3G     |
| BP | GO:004829 | isotype switching          | 4/905  | 14/18866  | 0.003578 | 0.010287 | 0.005406 | CD40/IL27I   |
| BP | GO:009071 | immunology                 | 4/905  | 14/18866  | 0.003578 | 0.010287 | 0.005406 | IFNL1/TNFS   |
| BP | GO:200127 | regulation                 | 4/905  | 14/18866  | 0.003578 | 0.010287 | 0.005406 | IL1B/FABP    |
| BP | GO:000828 | insulin receptor signaling | 15/905 | 143/18866 | 0.00365  | 0.01049  | 0.005513 | IL1B/SOCS2   |
| BP | GO:000758 | excretion                  | 9/905  | 65/18866  | 0.003697 | 0.010613 | 0.005577 | AQP9/EDN     |
| BP | GO:005120 | protein insulin signaling  | 9/905  | 65/18866  | 0.003697 | 0.010613 | 0.005577 | HSP90AA1,    |
| BP | GO:003576 | endothelial cell           | 6/905  | 32/18866  | 0.00372  | 0.010667 | 0.005606 | CXCL13/TM    |
| BP | GO:007052 | protein kinase             | 6/905  | 32/18866  | 0.00372  | 0.010667 | 0.005606 | CD40/VEGI    |
| BP | GO:005105 | regulation                 | 27/905 | 323/18866 | 0.003734 | 0.0107   | 0.005623 | F2R/F2RL1,   |
| BP | GO:003051 | intracellular signaling    | 13/905 | 116/18866 | 0.003738 | 0.010708 | 0.005627 | CALR/SRC/    |
| BP | GO:005080 | positive regulation        | 17/905 | 172/18866 | 0.003814 | 0.010918 | 0.005738 | S100B/TNFS   |
| BP | GO:003450 | protein localization       | 24/905 | 277/18866 | 0.00387  | 0.011074 | 0.00582  | CALR/HSP9    |
| BP | GO:006100 | hepaticobiliary secretion  | 15/905 | 144/18866 | 0.003899 | 0.011152 | 0.005861 | TNFAIP3/IL   |
| BP | GO:003085 | negative regulation        | 8/905  | 54/18866  | 0.003984 | 0.011389 | 0.005985 | IFNG/MMF     |
| BP | GO:001047 | regulation                 | 7/905  | 43/18866  | 0.004059 | 0.011583 | 0.006087 | ADIPOQ/IL    |
| BP | GO:004001 | positive regulation        | 7/905  | 43/18866  | 0.004059 | 0.011583 | 0.006087 | GDNF/IGF1    |
| BP | GO:004577 | positive regulation        | 7/905  | 43/18866  | 0.004059 | 0.011583 | 0.006087 | CXCL12/VE    |
| BP | GO:004593 | negative regulation        | 28/905 | 341/18866 | 0.004082 | 0.011642 | 0.006118 | PSMB8/PSI    |
| BP | GO:004566 | positive regulation        | 9/905  | 66/18866  | 0.004103 | 0.011648 | 0.006121 | LTF/IFITM1   |
| BP | GO:004662 | regulation                 | 9/905  | 66/18866  | 0.004103 | 0.011648 | 0.006121 | IL1B/SOCS2   |
| BP | GO:004682 | positive regulation        | 9/905  | 66/18866  | 0.004103 | 0.011648 | 0.006121 | HSP90AB1,    |

|    |           |              |        |           |          |          |          |            |
|----|-----------|--------------|--------|-----------|----------|----------|----------|------------|
| BP | GO:003270 | negative re  | 5/905  | 23/18866  | 0.004105 | 0.011648 | 0.006121 | XCL1/TNFA  |
| BP | GO:003545 | cellular res | 5/905  | 23/18866  | 0.004105 | 0.011648 | 0.006121 | TLR3/STAT  |
| BP | GO:004202 | protein ref  | 5/905  | 23/18866  | 0.004105 | 0.011648 | 0.006121 | B2M/HSPA   |
| BP | GO:004613 | pyrimidine   | 5/905  | 23/18866  | 0.004105 | 0.011648 | 0.006121 | APOBEC3G   |
| BP | GO:005104 | regulation   | 5/905  | 23/18866  | 0.004105 | 0.011648 | 0.006121 | IFNG/IL1B/ |
| BP | GO:005122 | cytoplasmic  | 5/905  | 23/18866  | 0.004105 | 0.011648 | 0.006121 | PSMD10/T   |
| BP | GO:009034 | positive re  | 5/905  | 23/18866  | 0.004105 | 0.011648 | 0.006121 | B2M/HLA-C  |
| BP | GO:000330 | cardiac mu   | 12/905 | 104/18866 | 0.004131 | 0.011714 | 0.006156 | PTK2/AGT/  |
| BP | GO:000664 | phospholip   | 35/905 | 455/18866 | 0.004161 | 0.011795 | 0.006199 | TGFB1/FAE  |
| BP | GO:001571 | monocarbo    | 17/905 | 174/18866 | 0.00429  | 0.012152 | 0.006386 | IL1B/FABP5 |
| BP | GO:002198 | olfactory lc | 6/905  | 33/18866  | 0.004365 | 0.012354 | 0.006492 | WNT5A/SE   |
| BP | GO:003502 | positive re  | 6/905  | 33/18866  | 0.004365 | 0.012354 | 0.006492 | F2R/F2RL1, |
| BP | GO:000736 | gastrulation | 18/905 | 189/18866 | 0.004394 | 0.012414 | 0.006524 | MMP9/ADI   |
| BP | GO:001082 | regulation   | 10/905 | 79/18866  | 0.004403 | 0.012414 | 0.006524 | IL1B/FABP5 |
| BP | GO:003101 | pancreas d   | 10/905 | 79/18866  | 0.004403 | 0.012414 | 0.006524 | WNT5A/GS   |
| BP | GO:004224 | tissue rege  | 10/905 | 79/18866  | 0.004403 | 0.012414 | 0.006524 | APOD/FGF   |
| BP | GO:004340 | negative re  | 10/905 | 79/18866  | 0.004403 | 0.012414 | 0.006524 | IL1B/ADIPC |
| BP | GO:007037 | negative re  | 10/905 | 79/18866  | 0.004403 | 0.012414 | 0.006524 | ADIPOQ/AI  |
| BP | GO:009039 | cellular ser | 10/905 | 79/18866  | 0.004403 | 0.012414 | 0.006524 | B2M/CALR   |
| BP | GO:004247 | odontogen    | 14/905 | 132/18866 | 0.004426 | 0.012474 | 0.006556 | SRC/TNFSF  |
| BP | GO:006034 | bone devel   | 19/905 | 204/18866 | 0.00445  | 0.012534 | 0.006587 | LTF/SRC/TI |
| BP | GO:003506 | regulation   | 8/905  | 55/18866  | 0.004471 | 0.012574 | 0.006608 | IL1B/MAPK  |
| BP | GO:005081 | negative re  | 8/905  | 55/18866  | 0.004471 | 0.012574 | 0.006608 | PROCR/PLA  |
| BP | GO:009734 | mitochond    | 8/905  | 55/18866  | 0.004471 | 0.012574 | 0.006608 | GSK3B/GZI  |
| BP | GO:003105 | positive re  | 11/905 | 92/18866  | 0.004505 | 0.012649 | 0.006647 | IL1B/VEGF, |
| BP | GO:190040 | regulation   | 11/905 | 92/18866  | 0.004505 | 0.012649 | 0.006647 | TNF/IL10/N |
| BP | GO:190332 | negative re  | 11/905 | 92/18866  | 0.004505 | 0.012649 | 0.006647 | ISG15/TNF. |
| BP | GO:000602 | aminoglyc    | 9/905  | 67/18866  | 0.004543 | 0.012749 | 0.0067   | PGLYRP1/P  |
| BP | GO:000963 | response tr  | 22/905 | 250/18866 | 0.004609 | 0.012929 | 0.006795 | LCN2/S100  |
| BP | GO:001046 | mesenchym    | 7/905  | 44/18866  | 0.004631 | 0.012969 | 0.006816 | STAT1/VEG  |
| BP | GO:003300 | regulation   | 7/905  | 44/18866  | 0.004631 | 0.012969 | 0.006816 | FCER1G/PL  |
| BP | GO:190198 | positive re  | 7/905  | 44/18866  | 0.004631 | 0.012969 | 0.006816 | IL1B/MAPK  |
| BP | GO:003596 | response tr  | 19/905 | 205/18866 | 0.004691 | 0.013045 | 0.006856 | CALR/HSPA  |
| BP | GO:000246 | germinal cl  | 4/905  | 15/18866  | 0.004696 | 0.013045 | 0.006856 | CXCL13/TN  |
| BP | GO:000286 | regulation   | 4/905  | 15/18866  | 0.004696 | 0.013045 | 0.006856 | FCER1G/CC  |
| BP | GO:002002 | hemoglobin   | 4/905  | 15/18866  | 0.004696 | 0.013045 | 0.006856 | EPO/INHA/  |
| BP | GO:003023 | male sex d   | 4/905  | 15/18866  | 0.004696 | 0.013045 | 0.006856 | PTGDR/GN   |
| BP | GO:003574 | T-helper 2   | 4/905  | 15/18866  | 0.004696 | 0.013045 | 0.006856 | XCL1/RSAD  |
| BP | GO:004236 | fat-soluble  | 4/905  | 15/18866  | 0.004696 | 0.013045 | 0.006856 | IFNG/IL1B/ |
| BP | GO:004337 | CD8-positi   | 4/905  | 15/18866  | 0.004696 | 0.013045 | 0.006856 | SOCS1/IRF  |
| BP | GO:005104 | positive re  | 4/905  | 15/18866  | 0.004696 | 0.013045 | 0.006856 | IFNG/IL1B/ |
| BP | GO:006033 | negative re  | 4/905  | 15/18866  | 0.004696 | 0.013045 | 0.006856 | MMP12/AI   |
| BP | GO:007180 | regulation   | 4/905  | 15/18866  | 0.004696 | 0.013045 | 0.006856 | TNF/SRC/H  |
| BP | GO:009019 | regulation   | 4/905  | 15/18866  | 0.004696 | 0.013045 | 0.006856 | ADIPOQ/PI  |
| BP | GO:190155 | regulation   | 4/905  | 15/18866  | 0.004696 | 0.013045 | 0.006856 | IL1B/TNF/\ |
| BP | GO:190314 | regulation   | 4/905  | 15/18866  | 0.004696 | 0.013045 | 0.006856 | IL1B/TNF/\ |
| BP | GO:200102 | positive re  | 4/905  | 15/18866  | 0.004696 | 0.013045 | 0.006856 | TMSB4X/V   |
| BP | GO:000716 | establishm   | 20/905 | 220/18866 | 0.004697 | 0.013045 | 0.006856 | HSP90AA1,  |
| BP | GO:005512 | digestive s  | 15/905 | 147/18866 | 0.004731 | 0.013133 | 0.006902 | CXCL8/TNF  |
| BP | GO:003139 | negative re  | 10/905 | 80/18866  | 0.004821 | 0.013367 | 0.007025 | ISG15/TNF. |

|    |           |              |        |           |          |          |          |            |
|----|-----------|--------------|--------|-----------|----------|----------|----------|------------|
| BP | GO:190402 | regulation   | 12/905 | 106/18866 | 0.004822 | 0.013367 | 0.007025 | HSP90AB1,  |
| BP | GO:190526 | positive re  | 12/905 | 106/18866 | 0.004822 | 0.013367 | 0.007025 | IL1B/VEGF, |
| BP | GO:003051 | regulation   | 11/905 | 93/18866  | 0.004893 | 0.013557 | 0.007125 | HJV/WNT5   |
| BP | GO:007124 | cellular res | 20/905 | 221/18866 | 0.004939 | 0.013675 | 0.007187 | B2M/CALR,  |
| BP | GO:000693 | muscle con   | 29/905 | 362/18866 | 0.004962 | 0.013734 | 0.007218 | F2R/DES/P  |
| BP | GO:001052 | regulation   | 5/905  | 24/18866  | 0.004984 | 0.013737 | 0.007219 | APOBEC3G   |
| BP | GO:001052 | negative re  | 5/905  | 24/18866  | 0.004984 | 0.013737 | 0.007219 | APOBEC3G   |
| BP | GO:003233 | negative re  | 5/905  | 24/18866  | 0.004984 | 0.013737 | 0.007219 | GDF5/GREI  |
| BP | GO:003414 | regulation   | 5/905  | 24/18866  | 0.004984 | 0.013737 | 0.007219 | LBP/LTF/BF |
| BP | GO:004595 | positive re  | 5/905  | 24/18866  | 0.004984 | 0.013737 | 0.007219 | HLA-F/RAE  |
| BP | GO:007084 | inclusion b  | 5/905  | 24/18866  | 0.004984 | 0.013737 | 0.007219 | HSPA2/MA   |
| BP | GO:190342 | regulation   | 5/905  | 24/18866  | 0.004984 | 0.013737 | 0.007219 | PAEP/RAC3  |
| BP | GO:200020 | regulation   | 5/905  | 24/18866  | 0.004984 | 0.013737 | 0.007219 | SRC/PTK2/  |
| BP | GO:001081 | negative re  | 9/905  | 68/18866  | 0.005018 | 0.013826 | 0.007266 | MMP12/AF   |
| BP | GO:003164 | regulation   | 15/905 | 148/18866 | 0.005038 | 0.013865 | 0.007286 | S100B/FAB  |
| BP | GO:007190 | negative re  | 15/905 | 148/18866 | 0.005038 | 0.013865 | 0.007286 | IL1B/ADIPC |
| BP | GO:004595 | regulation   | 14/905 | 134/18866 | 0.005061 | 0.013921 | 0.007316 | ADIPOQ/W   |
| BP | GO:001907 | viral releas | 6/905  | 34/18866  | 0.00509  | 0.013958 | 0.007336 | PML/PPIA/  |
| BP | GO:003043 | sleep        | 6/905  | 34/18866  | 0.00509  | 0.013958 | 0.007336 | PTGDS/PTC  |
| BP | GO:003589 | exit from h  | 6/905  | 34/18866  | 0.00509  | 0.013958 | 0.007336 | PML/PPIA/  |
| BP | GO:003589 | exit from h  | 6/905  | 34/18866  | 0.00509  | 0.013958 | 0.007336 | PML/PPIA/  |
| BP | GO:190269 | regulation   | 6/905  | 34/18866  | 0.00509  | 0.013958 | 0.007336 | VEGFA/CX3  |
| BP | GO:200035 | negative re  | 6/905  | 34/18866  | 0.00509  | 0.013958 | 0.007336 | ICAM1/TNI  |
| BP | GO:001652 | negative re  | 18/905 | 192/18866 | 0.005176 | 0.014188 | 0.007456 | HLA-G/CXC  |
| BP | GO:001489 | striated mu  | 12/905 | 107/18866 | 0.005201 | 0.014241 | 0.007484 | PTK2/AGT/  |
| BP | GO:005501 | cardiac mu   | 12/905 | 107/18866 | 0.005201 | 0.014241 | 0.007484 | RBP4/AGT/  |
| BP | GO:000752 | myoblast fi  | 7/905  | 45/18866  | 0.005262 | 0.014357 | 0.007545 | CXCL10/CX  |
| BP | GO:003101 | endocrine    | 7/905  | 45/18866  | 0.005262 | 0.014357 | 0.007545 | WNT5A/GS   |
| BP | GO:003292 | activin rec  | 7/905  | 45/18866  | 0.005262 | 0.014357 | 0.007545 | HJV/FGF10  |
| BP | GO:004277 | intrinsic ap | 7/905  | 45/18866  | 0.005262 | 0.014357 | 0.007545 | PML/MIF/I  |
| BP | GO:004591 | positive re  | 7/905  | 45/18866  | 0.005262 | 0.014357 | 0.007545 | TGFB1/TFR  |
| BP | GO:005502 | negative re  | 7/905  | 45/18866  | 0.005262 | 0.014357 | 0.007545 | RBP4/BMP   |
| BP | GO:006041 | ventricular  | 7/905  | 45/18866  | 0.005262 | 0.014357 | 0.007545 | WNT5A/RC   |
| BP | GO:006099 | kidney mor   | 11/905 | 94/18866  | 0.005308 | 0.014477 | 0.007608 | STAT1/VEG  |
| BP | GO:000761 | memory       | 13/905 | 121/18866 | 0.005361 | 0.014612 | 0.007679 | S100B/MA   |
| BP | GO:007124 | cellular res | 18/905 | 193/18866 | 0.005461 | 0.014877 | 0.007819 | B2M/CALR,  |
| BP | GO:007123 | cellular res | 9/905  | 69/18866  | 0.005532 | 0.015056 | 0.007912 | TNF/CYBB/  |
| BP | GO:190331 | regulation   | 9/905  | 69/18866  | 0.005532 | 0.015056 | 0.007912 | TFR2/SRC/I |
| BP | GO:001931 | hexose me    | 22/905 | 254/18866 | 0.005549 | 0.015095 | 0.007933 | RBP4/FABF  |
| BP | GO:000931 | response tr  | 34/905 | 447/18866 | 0.005562 | 0.015124 | 0.007948 | HSPA5/ICA  |
| BP | GO:004685 | phosphatic   | 8/905  | 57/18866  | 0.00558  | 0.015164 | 0.007969 | SOCS3/SOC  |
| BP | GO:004275 | regulation   | 13/905 | 122/18866 | 0.005744 | 0.015602 | 0.0082   | PTGDS/PM   |
| BP | GO:200018 | negative re  | 18/905 | 194/18866 | 0.005758 | 0.015632 | 0.008215 | HLA-G/CXC  |
| BP | GO:001648 | peptide ho   | 6/905  | 35/18866  | 0.005899 | 0.015966 | 0.00839  | CTSL/CTSG  |
| BP | GO:003969 | viral RNA g  | 6/905  | 35/18866  | 0.005899 | 0.015966 | 0.00839  | CXCL8/APC  |
| BP | GO:009700 | energy hor   | 6/905  | 35/18866  | 0.005899 | 0.015966 | 0.00839  | PIK3CA/BM  |
| BP | GO:011011 | negative re  | 6/905  | 35/18866  | 0.005899 | 0.015966 | 0.00839  | TNF/STAT1  |
| BP | GO:014044 | signaling re | 6/905  | 35/18866  | 0.005899 | 0.015966 | 0.00839  | CTSL/CTSG  |
| BP | GO:190001 | negative re  | 6/905  | 35/18866  | 0.005899 | 0.015966 | 0.00839  | APOD/NLR   |
| BP | GO:001087 | regulation   | 7/905  | 46/18866  | 0.005955 | 0.016102 | 0.008462 | CETP/ADIP  |



|    |           |              |        |           |          |          |          |            |
|----|-----------|--------------|--------|-----------|----------|----------|----------|------------|
| BP | GO:004853 | thymus dev   | 7/905  | 46/18866  | 0.005955 | 0.016102 | 0.008462 | MAPK3/FG   |
| BP | GO:000753 | sex determ   | 5/905  | 25/18866  | 0.005988 | 0.016118 | 0.008471 | PTGDR/AN   |
| BP | GO:001073 | regulation   | 5/905  | 25/18866  | 0.005988 | 0.016118 | 0.008471 | ADIPOQ/M   |
| BP | GO:004330 | positive re  | 5/905  | 25/18866  | 0.005988 | 0.016118 | 0.008471 | FCER1G/HI  |
| BP | GO:005068 | negative re  | 5/905  | 25/18866  | 0.005988 | 0.016118 | 0.008471 | MICB/NLR)  |
| BP | GO:006025 | regulation   | 5/905  | 25/18866  | 0.005988 | 0.016118 | 0.008471 | QRFP/RET)  |
| BP | GO:006066 | embryonic    | 5/905  | 25/18866  | 0.005988 | 0.016118 | 0.008471 | SOCS3/IL1) |
| BP | GO:006121 | regulation   | 5/905  | 25/18866  | 0.005988 | 0.016118 | 0.008471 | VEGFA/AG   |
| BP | GO:190556 | positive re  | 5/905  | 25/18866  | 0.005988 | 0.016118 | 0.008471 | AKT3/APLN  |
| BP | GO:200102 | regulation   | 5/905  | 25/18866  | 0.005988 | 0.016118 | 0.008471 | CXCL13/TM  |
| BP | GO:006004 | heart contr  | 24/905 | 287/18866 | 0.006    | 0.016133 | 0.008479 | S100A1/DE  |
| BP | GO:002153 | cell prolif  | 4/905  | 16/18866  | 0.006026 | 0.016133 | 0.008479 | C5AR1/EGF  |
| BP | GO:004253 | negative re  | 4/905  | 16/18866  | 0.006026 | 0.016133 | 0.008479 | SOCS3/SOC  |
| BP | GO:004299 | cytoplasm    | 4/905  | 16/18866  | 0.006026 | 0.016133 | 0.008479 | PSMD10/T   |
| BP | GO:004311 | negative re  | 4/905  | 16/18866  | 0.006026 | 0.016133 | 0.008479 | VEGFA/ADI  |
| BP | GO:004534 | MHC class    | 4/905  | 16/18866  | 0.006026 | 0.016133 | 0.008479 | IFNG/SLC1: |
| BP | GO:006085 | regulation   | 4/905  | 16/18866  | 0.006026 | 0.016133 | 0.008479 | PPARG/RO   |
| BP | GO:006145 | trophoblas   | 4/905  | 16/18866  | 0.006026 | 0.016133 | 0.008479 | CALR/VEGF  |
| BP | GO:007210 | glomerular   | 4/905  | 16/18866  | 0.006026 | 0.016133 | 0.008479 | PDGFRB/PI  |
| BP | GO:007222 | metaneph     | 4/905  | 16/18866  | 0.006026 | 0.016133 | 0.008479 | ADIPOQ/PI  |
| BP | GO:190116 | regulation   | 4/905  | 16/18866  | 0.006026 | 0.016133 | 0.008479 | CALR/VEGF  |
| BP | GO:002176 | limbic syst  | 12/905 | 109/18866 | 0.006029 | 0.016134 | 0.008479 | HDAC1/GS   |
| BP | GO:004521 | cell-cell j  | 19/905 | 210/18866 | 0.006063 | 0.016215 | 0.008522 | TGFB1/IL1) |
| BP | GO:000687 | cellular iro | 9/905  | 70/18866  | 0.006085 | 0.016266 | 0.008549 | IFNG/LCN2  |
| BP | GO:002188 | forebrain c  | 8/905  | 58/18866  | 0.006207 | 0.016561 | 0.008703 | CXCL12/CX  |
| BP | GO:190040 | negative re  | 8/905  | 58/18866  | 0.006207 | 0.016561 | 0.008703 | IL10/MET/I |
| BP | GO:190320 | negative re  | 8/905  | 58/18866  | 0.006207 | 0.016561 | 0.008703 | IL10/MET/I |
| BP | GO:190374 | positive re  | 8/905  | 58/18866  | 0.006207 | 0.016561 | 0.008703 | RAC2/GZM   |
| BP | GO:000157 | vasculogen   | 10/905 | 83/18866  | 0.006265 | 0.016707 | 0.00878  | TGFB1/VEG  |
| BP | GO:004856 | embryonic    | 34/905 | 451/18866 | 0.006353 | 0.016933 | 0.008899 | CXCL8/TGF  |
| BP | GO:190180 | positive re  | 12/905 | 110/18866 | 0.006481 | 0.017257 | 0.009069 | PSMC2/PSI  |
| BP | GO:190465 | glucose tra  | 12/905 | 110/18866 | 0.006481 | 0.017257 | 0.009069 | IL1B/FABP) |
| BP | GO:003585 | epithelial c | 7/905  | 47/18866  | 0.006714 | 0.017843 | 0.009377 | MMP9/ADI   |
| BP | GO:004330 | mast cell d  | 7/905  | 47/18866  | 0.006714 | 0.017843 | 0.009377 | FCER1G/BT  |
| BP | GO:004577 | negative re  | 7/905  | 47/18866  | 0.006714 | 0.017843 | 0.009377 | ADIPOQ/N)  |
| BP | GO:004848 | autonomic    | 7/905  | 47/18866  | 0.006714 | 0.017843 | 0.009377 | SEMA3A/E   |
| BP | GO:003647 | cell death i | 11/905 | 97/18866  | 0.006721 | 0.017853 | 0.009383 | PML/IL10/I |
| BP | GO:000156 | branching i  | 6/905  | 36/18866  | 0.006797 | 0.018036 | 0.009479 | VEGFA/DLI  |
| BP | GO:000621 | pyrimidine   | 6/905  | 36/18866  | 0.006797 | 0.018036 | 0.009479 | APOBEC3G   |
| BP | GO:000663 | unsaturate   | 8/905  | 59/18866  | 0.006887 | 0.018265 | 0.009599 | PTGDS/IL1) |
| BP | GO:005114 | positive re  | 12/905 | 111/18866 | 0.006959 | 0.018447 | 0.009695 | CXCL9/TGF  |
| BP | GO:003096 | endoplasm    | 13/905 | 125/18866 | 0.007028 | 0.018613 | 0.009782 | CALR/HSPA  |
| BP | GO:003460 | cellular res | 13/905 | 125/18866 | 0.007028 | 0.018613 | 0.009782 | HSP90AA1,  |
| BP | GO:000206 | glandular e  | 5/905  | 26/18866  | 0.007126 | 0.018798 | 0.009879 | WNT5A/GS   |
| BP | GO:002188 | forebrain n  | 5/905  | 26/18866  | 0.007126 | 0.018798 | 0.009879 | WNT5A/SE   |
| BP | GO:004350 | skeletal m   | 5/905  | 26/18866  | 0.007126 | 0.018798 | 0.009879 | IL15/ACTA: |
| BP | GO:006074 | prostate gl  | 5/905  | 26/18866  | 0.007126 | 0.018798 | 0.009879 | WNT5A/FC   |
| BP | GO:007220 | cell differ  | 5/905  | 26/18866  | 0.007126 | 0.018798 | 0.009879 | ADIPOQ/ST  |
| BP | GO:014005 | neuron prc   | 5/905  | 26/18866  | 0.007126 | 0.018798 | 0.009879 | WNT5A/SE   |
| BP | GO:190301 | regulation   | 5/905  | 26/18866  | 0.007126 | 0.018798 | 0.009879 | LTF/TNFSE: |

|    |                        |        |           |          |          |          |            |
|----|------------------------|--------|-----------|----------|----------|----------|------------|
| BP | GO:190475 positive re  | 5/905  | 26/18866  | 0.007126 | 0.018798 | 0.009879 | AGT/PDGF   |
| BP | GO:005080 regulation   | 20/905 | 229/18866 | 0.007269 | 0.019166 | 0.010072 | TLR2/TNF/  |
| BP | GO:004683 lipid phosp  | 9/905  | 72/18866  | 0.007318 | 0.019285 | 0.010135 | SOCS3/SOC  |
| BP | GO:003476 regulation   | 36/905 | 489/18866 | 0.007324 | 0.019294 | 0.01014  | HSPA2/IFN  |
| BP | GO:000697 response to  | 10/905 | 85/18866  | 0.0074   | 0.019485 | 0.01024  | HSP90AB1,  |
| BP | GO:007265 establishm   | 14/905 | 140/18866 | 0.007415 | 0.019515 | 0.010256 | HSP90AA1,  |
| BP | GO:000227 mast cell a  | 7/905  | 48/18866  | 0.007543 | 0.019821 | 0.010417 | FCER1G/BT  |
| BP | GO:001079 regulation   | 7/905  | 48/18866  | 0.007543 | 0.019821 | 0.010417 | TGFB1/WN   |
| BP | GO:190403 negative re  | 7/905  | 48/18866  | 0.007543 | 0.019821 | 0.010417 | ICAM1/TNI  |
| BP | GO:000203 G protein-c  | 4/905  | 17/18866  | 0.007585 | 0.019865 | 0.01044  | ARRB1/ADI  |
| BP | GO:003094 positive re  | 4/905  | 17/18866  | 0.007585 | 0.019865 | 0.01044  | IL1B/FGF1C |
| BP | GO:004244 progester    | 4/905  | 17/18866  | 0.007585 | 0.019865 | 0.01044  | ADM/LHB/   |
| BP | GO:004562 negative re  | 4/905  | 17/18866  | 0.007585 | 0.019865 | 0.01044  | TNFSF4/JAI |
| BP | GO:004853 anatomical   | 4/905  | 17/18866  | 0.007585 | 0.019865 | 0.01044  | HSPA5/SEN  |
| BP | GO:007024 thymocyte    | 4/905  | 17/18866  | 0.007585 | 0.019865 | 0.01044  | WNT5A/HI   |
| BP | GO:009706 cellular res | 4/905  | 17/18866  | 0.007585 | 0.019865 | 0.01044  | CTSB/CTSL, |
| BP | GO:190288 negative re  | 8/905  | 60/18866  | 0.007621 | 0.019948 | 0.010483 | IL10/MET/I |
| BP | GO:000751 muscle org   | 31/905 | 407/18866 | 0.00772  | 0.020197 | 0.010614 | CXCL10/S1  |
| BP | GO:003021 hyaluronar   | 6/905  | 37/18866  | 0.007791 | 0.020373 | 0.010707 | TGFB1/IL1E |
| BP | GO:001038 regulation   | 18/905 | 200/18866 | 0.007831 | 0.020459 | 0.010752 | HSPA2/HSF  |
| BP | GO:001703 protein im   | 18/905 | 200/18866 | 0.007831 | 0.020459 | 0.010752 | HSP90AA1,  |
| BP | GO:000170 formation    | 13/905 | 127/18866 | 0.008003 | 0.020899 | 0.010983 | MMP9/ITG   |
| BP | GO:003410 homotypic    | 10/905 | 86/18866  | 0.008025 | 0.020925 | 0.010997 | CCL5/TNFS  |
| BP | GO:003502 regulation   | 10/905 | 86/18866  | 0.008025 | 0.020925 | 0.010997 | F2R/F2RL1, |
| BP | GO:190186 positive re  | 10/905 | 86/18866  | 0.008025 | 0.020925 | 0.010997 | TGFB1/GRE  |
| BP | GO:005117 import int   | 16/905 | 171/18866 | 0.008243 | 0.021484 | 0.011291 | HSP90AB1,  |
| BP | GO:000729 female gan   | 14/905 | 142/18866 | 0.00837  | 0.021803 | 0.011458 | SRC/PTX3/  |
| BP | GO:000202 response to  | 5/905  | 27/18866  | 0.008407 | 0.021808 | 0.011461 | BMP8A/VC   |
| BP | GO:000202 regulation   | 5/905  | 27/18866  | 0.008407 | 0.021808 | 0.011461 | NOS1/ADM   |
| BP | GO:000314 outflow tra  | 5/905  | 27/18866  | 0.008407 | 0.021808 | 0.011461 | SEMA3C/R   |
| BP | GO:007253 T-helper 1   | 5/905  | 27/18866  | 0.008407 | 0.021808 | 0.011461 | IL23A/IL12 |
| BP | GO:190012 regulation   | 5/905  | 27/18866  | 0.008407 | 0.021808 | 0.011461 | B2M/MMP    |
| BP | GO:190320 regulation   | 5/905  | 27/18866  | 0.008407 | 0.021808 | 0.011461 | IL10/NR4A. |
| BP | GO:000602 glycosamin   | 8/905  | 61/18866  | 0.008412 | 0.021808 | 0.011461 | PGLYRP1/P  |
| BP | GO:190211 positive re  | 8/905  | 61/18866  | 0.008412 | 0.021808 | 0.011461 | GSK3B/GZM  |
| BP | GO:190390 positive re  | 8/905  | 61/18866  | 0.008412 | 0.021808 | 0.011461 | CD4/PPIA/  |
| BP | GO:200075 regulation   | 8/905  | 61/18866  | 0.008412 | 0.021808 | 0.011461 | IL1B/MAPK  |
| BP | GO:003085 prostate gl  | 7/905  | 49/18866  | 0.008445 | 0.021872 | 0.011495 | WNT5A/FC   |
| BP | GO:012017 steroid hor  | 7/905  | 49/18866  | 0.008445 | 0.021872 | 0.011495 | ADM/BMP.   |
| BP | GO:000864 hexose tra   | 12/905 | 114/18866 | 0.00856  | 0.022161 | 0.011646 | IL1B/FABP5 |
| BP | GO:003051 negative re  | 10/905 | 87/18866  | 0.008689 | 0.022472 | 0.01181  | HSPA5/TGF  |
| BP | GO:005507 iron ion ho  | 10/905 | 87/18866  | 0.008689 | 0.022472 | 0.01181  | B2M/IFNG,  |
| BP | GO:004863 positive re  | 17/905 | 187/18866 | 0.008708 | 0.022511 | 0.01183  | CXCL12/VE  |
| BP | GO:002153 diencephal   | 9/905  | 74/18866  | 0.008732 | 0.022563 | 0.011858 | WNT5A/FC   |
| BP | GO:001491 negative re  | 6/905  | 38/18866  | 0.008884 | 0.022891 | 0.01203  | ADIPOQ/SE  |
| BP | GO:003288 regulation   | 6/905  | 38/18866  | 0.008884 | 0.022891 | 0.01203  | TGFB1/GSK  |
| BP | GO:004302 T cell hom   | 6/905  | 38/18866  | 0.008884 | 0.022891 | 0.01203  | IL2RA/JAK3 |
| BP | GO:004577 positive re  | 6/905  | 38/18866  | 0.008884 | 0.022891 | 0.01203  | AGT/OXT/C  |
| BP | GO:005195 positive re  | 6/905  | 38/18866  | 0.008884 | 0.022891 | 0.01203  | CXCL12/AG  |
| BP | GO:190002 positive re  | 6/905  | 38/18866  | 0.008884 | 0.022891 | 0.01203  | CALR/LIMS  |

|    |           |              |        |           |          |          |          |            |
|----|-----------|--------------|--------|-----------|----------|----------|----------|------------|
| BP | GO:190288 | regulation   | 11/905 | 101/18866 | 0.009045 | 0.023292 | 0.012241 | TNF/IL10/N |
| BP | GO:006041 | heart grow   | 12/905 | 115/18866 | 0.009154 | 0.023561 | 0.012382 | RBP4/AGT/  |
| BP | GO:005178 | regulation   | 17/905 | 188/18866 | 0.00916  | 0.023568 | 0.012386 | CALR/IL1B/ |
| BP | GO:005185 | modulator    | 8/905  | 62/18866  | 0.009263 | 0.02381  | 0.012513 | LTF/CCL5/C |
| BP | GO:007138 | cellular res | 8/905  | 62/18866  | 0.009263 | 0.02381  | 0.012513 | ICAM1/STC  |
| BP | GO:003265 | regulation   | 4/905  | 18/18866  | 0.009388 | 0.024073 | 0.012651 | IFNL1/TNF  |
| BP | GO:004659 | negative re  | 4/905  | 18/18866  | 0.009388 | 0.024073 | 0.012651 | PTX3/IFITM |
| BP | GO:006003 | anatomical   | 4/905  | 18/18866  | 0.009388 | 0.024073 | 0.012651 | AMH/FLT1,  |
| BP | GO:006097 | coronary v:  | 4/905  | 18/18866  | 0.009388 | 0.024073 | 0.012651 | VEGFA/PD   |
| BP | GO:190022 | regulation   | 4/905  | 18/18866  | 0.009388 | 0.024073 | 0.012651 | IFNG/TNF/  |
| BP | GO:001021 | response to  | 14/905 | 144/18866 | 0.009418 | 0.024073 | 0.012651 | HSPA5/ICA  |
| BP | GO:007058 | protein loc  | 14/905 | 144/18866 | 0.009418 | 0.024073 | 0.012651 | HSP90AA1,  |
| BP | GO:001071 | positive re  | 7/905  | 50/18866  | 0.009423 | 0.024073 | 0.012651 | TGFB1/IL1  |
| BP | GO:003019 | negative re  | 7/905  | 50/18866  | 0.009423 | 0.024073 | 0.012651 | PLAU/PRO   |
| BP | GO:003164 | protein de   | 7/905  | 50/18866  | 0.009423 | 0.024073 | 0.012651 | SRC/BMP2,  |
| BP | GO:004854 | digestive tr | 7/905  | 50/18866  | 0.009423 | 0.024073 | 0.012651 | WNT5A/FC   |
| BP | GO:005087 | brown fat c  | 7/905  | 50/18866  | 0.009423 | 0.024073 | 0.012651 | FABP3/ADI  |
| BP | GO:190358 | positive re  | 7/905  | 50/18866  | 0.009423 | 0.024073 | 0.012651 | IFNG/TMS   |
| BP | GO:000170 | mesoderm     | 9/905  | 75/18866  | 0.009513 | 0.024245 | 0.012742 | WNT5A/D    |
| BP | GO:004362 | response to  | 9/905  | 75/18866  | 0.009513 | 0.024245 | 0.012742 | PDGFRB/P   |
| BP | GO:005080 | negative re  | 9/905  | 75/18866  | 0.009513 | 0.024245 | 0.012742 | IL1B/ADIPC |
| BP | GO:190007 | regulation   | 9/905  | 75/18866  | 0.009513 | 0.024245 | 0.012742 | IL1B/SOCS  |
| BP | GO:190198 | regulation   | 9/905  | 75/18866  | 0.009513 | 0.024245 | 0.012742 | IL1B/MAPK  |
| BP | GO:000007 | regulation   | 11/905 | 102/18866 | 0.009712 | 0.024729 | 0.012996 | PSMD10/T   |
| BP | GO:006084 | artery dev   | 11/905 | 102/18866 | 0.009712 | 0.024729 | 0.012996 | VEGFA/DLL  |
| BP | GO:001574 | monosacch    | 12/905 | 116/18866 | 0.009778 | 0.024874 | 0.013072 | IL1B/FABP  |
| BP | GO:004691 | cellular tra | 12/905 | 116/18866 | 0.009778 | 0.024874 | 0.013072 | IFNG/LCN2  |
| BP | GO:000233 | mature B c   | 5/905  | 28/18866  | 0.009838 | 0.024979 | 0.013128 | PTK2B/CD1  |
| BP | GO:000236 | T cell linea | 5/905  | 28/18866  | 0.009838 | 0.024979 | 0.013128 | CTSL/IL23A |
| BP | GO:006051 | prostate gl  | 5/905  | 28/18866  | 0.009838 | 0.024979 | 0.013128 | WNT5A/FC   |
| BP | GO:008011 | DNA deme     | 5/905  | 28/18866  | 0.009838 | 0.024979 | 0.013128 | APOBEC3G   |
| BP | GO:190199 | regulation   | 33/905 | 448/18866 | 0.009867 | 0.02504  | 0.013159 | HSPA2/HSF  |
| BP | GO:000820 | steroid me   | 26/905 | 332/18866 | 0.009957 | 0.025258 | 0.013274 | IFNG/NFYA  |
| BP | GO:000719 | activation   | 6/905  | 39/18866  | 0.010084 | 0.025543 | 0.013424 | EDNRA/AD   |
| BP | GO:001045 | regulation   | 6/905  | 39/18866  | 0.010084 | 0.025543 | 0.013424 | WNT5A/D    |
| BP | GO:190222 | regulation   | 6/905  | 39/18866  | 0.010084 | 0.025543 | 0.013424 | CXCL12/TP  |
| BP | GO:190384 | negative re  | 10/905 | 89/18866  | 0.010142 | 0.025651 | 0.013481 | HSPA5/TGF  |
| BP | GO:190268 | mitochond    | 8/905  | 63/18866  | 0.010177 | 0.025651 | 0.013481 | GSK3B/GZ   |
| BP | GO:000159 | luteinizatio | 3/905  | 10/18866  | 0.010245 | 0.025651 | 0.013481 | INHBA/RET  |
| BP | GO:000229 | T cell activ | 3/905  | 10/18866  | 0.010245 | 0.025651 | 0.013481 | HLA-DMB/   |
| BP | GO:000330 | regulation   | 3/905  | 10/18866  | 0.010245 | 0.025651 | 0.013481 | WNT5A/BN   |
| BP | GO:001404 | regulation   | 3/905  | 10/18866  | 0.010245 | 0.025651 | 0.013481 | RAC3/EDNI  |
| BP | GO:003281 | regulation   | 3/905  | 10/18866  | 0.010245 | 0.025651 | 0.013481 | IL15/FLT3L |
| BP | GO:003435 | regulation   | 3/905  | 10/18866  | 0.010245 | 0.025651 | 0.013481 | CCL2/PRKC  |
| BP | GO:003558 | sequesterir  | 3/905  | 10/18866  | 0.010245 | 0.025651 | 0.013481 | LTBP1/GRE  |
| BP | GO:004308 | penile er    | 3/905  | 10/18866  | 0.010245 | 0.025651 | 0.013481 | EDNRB/OX   |
| BP | GO:004571 | low-density  | 3/905  | 10/18866  | 0.010245 | 0.025651 | 0.013481 | ADIPOQ/IT  |
| BP | GO:004659 | positive re  | 3/905  | 10/18866  | 0.010245 | 0.025651 | 0.013481 | CD4/LGALS  |
| BP | GO:004826 | determinat   | 3/905  | 10/18866  | 0.010245 | 0.025651 | 0.013481 | GREM1/GF   |
| BP | GO:005154 | elastin met  | 3/905  | 10/18866  | 0.010245 | 0.025651 | 0.013481 | CTSL/MMP   |

|    |           |                |        |           |          |          |          |            |
|----|-----------|----------------|--------|-----------|----------|----------|----------|------------|
| BP | GO:007005 | regulation     | 3/905  | 10/18866  | 0.010245 | 0.025651 | 0.013481 | CCL5/HIF1A |
| BP | GO:007047 | regulation     | 3/905  | 10/18866  | 0.010245 | 0.025651 | 0.013481 | OXT/GPER   |
| BP | GO:007094 | neutrophil     | 3/905  | 10/18866  | 0.010245 | 0.025651 | 0.013481 | CTSG/F2RL  |
| BP | GO:007110 | response to    | 3/905  | 10/18866  | 0.010245 | 0.025651 | 0.013481 | STAT1/IL2F |
| BP | GO:007164 | regulation     | 3/905  | 10/18866  | 0.010245 | 0.025651 | 0.013481 | ARG2/IL10  |
| BP | GO:007212 | regulation     | 3/905  | 10/18866  | 0.010245 | 0.025651 | 0.013481 | PDGFB/PDG  |
| BP | GO:007220 | cell prolifera | 3/905  | 10/18866  | 0.010245 | 0.025651 | 0.013481 | STAT1/PDC  |
| BP | GO:007529 | positive re    | 3/905  | 10/18866  | 0.010245 | 0.025651 | 0.013481 | CD4/LGALS  |
| BP | GO:190202 | L-arginine     | 13/905 | 10/18866  | 0.010245 | 0.025651 | 0.013481 | SLC11A1/A  |
| BP | GO:190223 | positive re    | 3/905  | 10/18866  | 0.010245 | 0.025651 | 0.013481 | PMAIP1/PT  |
| BP | GO:190433 | regulation     | 3/905  | 10/18866  | 0.010245 | 0.025651 | 0.013481 | GSK3B/DKI  |
| BP | GO:009886 | cellular oxi   | 11/905 | 103/18866 | 0.010417 | 0.02607  | 0.013701 | S100A9/DL  |
| BP | GO:002187 | forebrain n    | 7/905  | 51/18866  | 0.010483 | 0.026197 | 0.013767 | B2M/WNT    |
| BP | GO:004591 | negative re    | 7/905  | 51/18866  | 0.010483 | 0.026197 | 0.013767 | TGFB1/ADI  |
| BP | GO:190004 | negative re    | 7/905  | 51/18866  | 0.010483 | 0.026197 | 0.013767 | PLAU/PRO   |
| BP | GO:009006 | positive re    | 24/905 | 302/18866 | 0.010937 | 0.027319 | 0.014357 | HSPA2/IL1I |
| BP | GO:000008 | G2/M tran      | 21/905 | 254/18866 | 0.010982 | 0.02742  | 0.01441  | HSPA2/HSF  |
| BP | GO:001591 | sterol tran    | 12/905 | 118/18866 | 0.011127 | 0.027756 | 0.014587 | CETP/ADIP  |
| BP | GO:003421 | carbohydrate   | 12/905 | 118/18866 | 0.011127 | 0.027756 | 0.014587 | IL1B/FABP  |
| BP | GO:000188 | endothelia     | 8/905  | 64/18866  | 0.011156 | 0.027778 | 0.014598 | ICAM1/IL1I |
| BP | GO:000206 | columnar/c     | 8/905  | 64/18866  | 0.011156 | 0.027778 | 0.014598 | WNT5A/SR   |
| BP | GO:003283 | glomerulus     | 8/905  | 64/18866  | 0.011156 | 0.027778 | 0.014598 | ADIPOQ/PI  |
| BP | GO:003334 | cholesterol    | 8/905  | 64/18866  | 0.011156 | 0.027778 | 0.014598 | CETP/ADIP  |
| BP | GO:005159 | response to    | 14/905 | 147/18866 | 0.011182 | 0.027829 | 0.014625 | HSPA5/S10  |
| BP | GO:000742 | peripheral     | 9/905  | 77/18866  | 0.011231 | 0.027901 | 0.014663 | NDRG1/ED   |
| BP | GO:004833 | mesoderm       | 9/905  | 77/18866  | 0.011231 | 0.027901 | 0.014663 | WNT5A/DK   |
| BP | GO:007202 | nephron m      | 9/905  | 77/18866  | 0.011231 | 0.027901 | 0.014663 | STAT1/VEC  |
| BP | GO:190320 | regulation     | 9/905  | 77/18866  | 0.011231 | 0.027901 | 0.014663 | IL10/MET/I |
| BP | GO:000725 | activation     | 6/905  | 40/18866  | 0.011394 | 0.028115 | 0.014776 | WNT5A/DK   |
| BP | GO:000820 | C21-steroid    | 6/905  | 40/18866  | 0.011394 | 0.028115 | 0.014776 | ADM/BMP    |
| BP | GO:190342 | negative re    | 6/905  | 40/18866  | 0.011394 | 0.028115 | 0.014776 | IL10/FYN/H |
| BP | GO:000178 | B cell home    | 5/905  | 29/18866  | 0.011429 | 0.028115 | 0.014776 | TNFAIP3/M  |
| BP | GO:000726 | nitric oxide   | 5/905  | 29/18866  | 0.011429 | 0.028115 | 0.014776 | VEGFA/NO   |
| BP | GO:003219 | transpositi    | 5/905  | 29/18866  | 0.011429 | 0.028115 | 0.014776 | APOBEC3G   |
| BP | GO:003237 | positive re    | 5/905  | 29/18866  | 0.011429 | 0.028115 | 0.014776 | CETP/ADIP  |
| BP | GO:003237 | positive re    | 5/905  | 29/18866  | 0.011429 | 0.028115 | 0.014776 | CETP/ADIP  |
| BP | GO:003629 | response to    | 5/905  | 29/18866  | 0.011429 | 0.028115 | 0.014776 | PDGFRB/PI  |
| BP | GO:004567 | negative re    | 5/905  | 29/18866  | 0.011429 | 0.028115 | 0.014776 | LTF/TLR3/C |
| BP | GO:000199 | regulation     | 4/905  | 19/18866  | 0.011448 | 0.028115 | 0.014776 | CTSG/F2R/  |
| BP | GO:000292 | positive re    | 4/905  | 19/18866  | 0.011448 | 0.028115 | 0.014776 | LTA/IL1B/T |
| BP | GO:000315 | morphogen      | 4/905  | 19/18866  | 0.011448 | 0.028115 | 0.014776 | CXCL10/DL  |
| BP | GO:003598 | chondrocyt     | 4/905  | 19/18866  | 0.011448 | 0.028115 | 0.014776 | LTF/STC1/E |
| BP | GO:004337 | CD4-positi     | 4/905  | 19/18866  | 0.011448 | 0.028115 | 0.014776 | CTSL/IL23A |
| BP | GO:004432 | cellular res   | 4/905  | 19/18866  | 0.011448 | 0.028115 | 0.014776 | EBI3/LEPR/ |
| BP | GO:004662 | gamma-de       | 4/905  | 19/18866  | 0.011448 | 0.028115 | 0.014776 | MICA/MICI  |
| BP | GO:004848 | parasympa      | 4/905  | 19/18866  | 0.011448 | 0.028115 | 0.014776 | SEMA3A/P   |
| BP | GO:005154 | keratinocyt    | 4/905  | 19/18866  | 0.011448 | 0.028115 | 0.014776 | MMP9/FGF   |
| BP | GO:006025 | positive re    | 4/905  | 19/18866  | 0.011448 | 0.028115 | 0.014776 | LTA/IL1B/T |
| BP | GO:006060 | branch eloi    | 4/905  | 19/18866  | 0.011448 | 0.028115 | 0.014776 | WNT5A/FG   |
| BP | GO:006115 | endothelia     | 4/905  | 19/18866  | 0.011448 | 0.028115 | 0.014776 | CXCL10/DL  |

|    |                                            |           |          |          |          |             |
|----|--------------------------------------------|-----------|----------|----------|----------|-------------|
| BP | GO:007180 podosome 4/905                   | 19/18866  | 0.011448 | 0.028115 | 0.014776 | TNF/SRC/H   |
| BP | GO:190397 regulation 4/905                 | 19/18866  | 0.011448 | 0.028115 | 0.014776 | CCL3/CX3C   |
| BP | GO:200069 regulation 4/905                 | 19/18866  | 0.011448 | 0.028115 | 0.014776 | MMP9/AD     |
| BP | GO:005507 sodium ion 7/905                 | 52/18866  | 0.011626 | 0.028526 | 0.014991 | EDNRB/AG    |
| BP | GO:007213 mesenchym 7/905                  | 52/18866  | 0.011626 | 0.028526 | 0.014991 | WNT5A/AC    |
| BP | GO:005149 regulation 10/905                | 91/18866  | 0.011774 | 0.028863 | 0.015168 | NOX4/PIK3   |
| BP | GO:006002 roof of mouth 10/905             | 91/18866  | 0.011774 | 0.028863 | 0.015168 | WNT5A/GI    |
| BP | GO:000708 regulation 15/905                | 163/18866 | 0.011906 | 0.029173 | 0.015332 | IL1B/IL1A/I |
| BP | GO:003030 cholesterol 11/905               | 105/18866 | 0.011944 | 0.029255 | 0.015375 | CETP/ADIP   |
| BP | GO:007233 intrinsic apoptosis 9/905        | 78/18866  | 0.012173 | 0.029801 | 0.015662 | PML/MIF/I   |
| BP | GO:003579 positive regulation 8/905        | 65/18866  | 0.012203 | 0.029835 | 0.01568  | GSK3B/GZI   |
| BP | GO:004678 regulation 8/905                 | 65/18866  | 0.012203 | 0.029835 | 0.01568  | CCL5/CCL4   |
| BP | GO:190595 negative regulation 8/905        | 65/18866  | 0.012203 | 0.029835 | 0.01568  | TNF/ITGAV   |
| BP | GO:190305 regulation 19/905                | 225/18866 | 0.012243 | 0.029919 | 0.015724 | HSP90AB1,   |
| BP | GO:007115 regulation 11/905                | 106/18866 | 0.012769 | 0.031191 | 0.016392 | CALR/HSP9   |
| BP | GO:004259 fear response 6/905              | 41/18866  | 0.01282  | 0.031301 | 0.01645  | MDK/UCN,    |
| BP | GO:004566 negative regulation 7/905        | 53/18866  | 0.012856 | 0.031332 | 0.016466 | TNF/AREG,   |
| BP | GO:005170 intraspecific 7/905              | 53/18866  | 0.012856 | 0.031332 | 0.016466 | LTF/BPIFA1  |
| BP | GO:007132 cellular response 7/905          | 53/18866  | 0.012856 | 0.031332 | 0.016466 | HSPA5/NO    |
| BP | GO:190002 regulation 7/905                 | 53/18866  | 0.012856 | 0.031332 | 0.016466 | CALR/LIMS   |
| BP | GO:190113 carbohydrate 17/905              | 195/18866 | 0.012877 | 0.03137  | 0.016486 | CTSL/MMP    |
| BP | GO:003368 regulation 5/905                 | 30/18866  | 0.013186 | 0.032035 | 0.016835 | LTF/ITGAV,  |
| BP | GO:003647 neuron death 5/905               | 30/18866  | 0.013186 | 0.032035 | 0.016835 | IL10/NR4A   |
| BP | GO:004814 negative regulation 5/905        | 30/18866  | 0.013186 | 0.032035 | 0.016835 | LTA/PPARC   |
| BP | GO:007148 cellular response 5/905          | 30/18866  | 0.013186 | 0.032035 | 0.016835 | HSPA5/NO    |
| BP | GO:009031 positive regulation 5/905        | 30/18866  | 0.013186 | 0.032035 | 0.016835 | CHP1/ITGB   |
| BP | GO:190218 regulation 5/905                 | 30/18866  | 0.013186 | 0.032035 | 0.016835 | PML/TRIM.   |
| BP | GO:190210 regulation 8/905                 | 66/18866  | 0.013321 | 0.032333 | 0.016992 | GSK3B/GZI   |
| BP | GO:200037 negative regulation 8/905        | 66/18866  | 0.013321 | 0.032333 | 0.016992 | IL10/FYN/H  |
| BP | GO:000652 arginine catabolism 3/905        | 11/18866  | 0.013591 | 0.032421 | 0.017039 | ARG2/NOS    |
| BP | GO:001073 positive regulation 3/905        | 11/18866  | 0.013591 | 0.032421 | 0.017039 | ADIPOQ/M    |
| BP | GO:001488 muscle atrophy 3/905             | 11/18866  | 0.013591 | 0.032421 | 0.017039 | IL15/PPARC  |
| BP | GO:001937 cyclooxygenase 3/905             | 11/18866  | 0.013591 | 0.032421 | 0.017039 | PTGDS/PTC   |
| BP | GO:002156 facial nerve 3/905               | 11/18866  | 0.013591 | 0.032421 | 0.017039 | SEMA3A/P    |
| BP | GO:002160 cranial nerve 3/905              | 11/18866  | 0.013591 | 0.032421 | 0.017039 | SEMA3A/P    |
| BP | GO:002161 facial nerve 3/905               | 11/18866  | 0.013591 | 0.032421 | 0.017039 | SEMA3A/P    |
| BP | GO:003227 regulation 3/905                 | 11/18866  | 0.013591 | 0.032421 | 0.017039 | INHA/INH    |
| BP | GO:003314 positive regulation 3/905        | 11/18866  | 0.013591 | 0.032421 | 0.017039 | AR/PAK1/S   |
| BP | GO:003348 gas homeostasis 3/905            | 11/18866  | 0.013591 | 0.032421 | 0.017039 | HIF1A/CAV   |
| BP | GO:003411 negative regulation 3/905        | 11/18866  | 0.013591 | 0.032421 | 0.017039 | ADIPOQ/IL   |
| BP | GO:003545 cellular response 3/905          | 11/18866  | 0.013591 | 0.032421 | 0.017039 | IFIT3/AXL/I |
| BP | GO:003953 negative regulation 3/905        | 11/18866  | 0.013591 | 0.032421 | 0.017039 | NLRX1/DH    |
| BP | GO:004506 negative thymocyte 3/905         | 11/18866  | 0.013591 | 0.032421 | 0.017039 | CCR7/ZAP7   |
| BP | GO:004562 regulation 3/905                 | 11/18866  | 0.013591 | 0.032421 | 0.017039 | TNFSF4/CD   |
| BP | GO:004664 negative regulation 3/905        | 11/18866  | 0.013591 | 0.032421 | 0.017039 | XCL1/ARG2   |
| BP | GO:006130 cardiac neovascularization 3/905 | 11/18866  | 0.013591 | 0.032421 | 0.017039 | MAPK3/SEI   |
| BP | GO:006130 cardiac neovascularization 3/905 | 11/18866  | 0.013591 | 0.032421 | 0.017039 | MAPK3/SEI   |
| BP | GO:007033 response to 3/905                | 11/18866  | 0.013591 | 0.032421 | 0.017039 | TLR2/TLR6,  |
| BP | GO:007058 regulation 3/905                 | 11/18866  | 0.013591 | 0.032421 | 0.017039 | ADIPOQ/IL   |
| BP | GO:007122 cellular response 3/905          | 11/18866  | 0.013591 | 0.032421 | 0.017039 | TLR2/TLR6,  |

|    |           |              |        |           |          |          |          |             |
|----|-----------|--------------|--------|-----------|----------|----------|----------|-------------|
| BP | GO:007122 | cellular res | 3/905  | 11/18866  | 0.013591 | 0.032421 | 0.017039 | TLR2/TLR6,  |
| BP | GO:007128 | cellular res | 3/905  | 11/18866  | 0.013591 | 0.032421 | 0.017039 | B2M/NFYA    |
| BP | GO:007160 | chemokine    | 3/905  | 11/18866  | 0.013591 | 0.032421 | 0.017039 | ARG2/IL10,  |
| BP | GO:007180 | positive re  | 3/905  | 11/18866  | 0.013591 | 0.032421 | 0.017039 | TNF/SRC/C   |
| BP | GO:009704 | dendritic cr | 3/905  | 11/18866  | 0.013591 | 0.032421 | 0.017039 | CXCL12/CC   |
| BP | GO:009735 | response tr  | 3/905  | 11/18866  | 0.013591 | 0.032421 | 0.017039 | IL17C/IL17I |
| BP | GO:009735 | cellular res | 3/905  | 11/18866  | 0.013591 | 0.032421 | 0.017039 | IL17C/IL17I |
| BP | GO:009740 | interleukin  | 3/905  | 11/18866  | 0.013591 | 0.032421 | 0.017039 | IL17C/IL17I |
| BP | GO:190247 | positive re  | 3/905  | 11/18866  | 0.013591 | 0.032421 | 0.017039 | MAPT/WN     |
| BP | GO:190398 | positive re  | 3/905  | 11/18866  | 0.013591 | 0.032421 | 0.017039 | CCL3/LRRK   |
| BP | GO:190432 | response tr  | 3/905  | 11/18866  | 0.013591 | 0.032421 | 0.017039 | GNAI1/CFT   |
| BP | GO:190432 | cellular res | 3/905  | 11/18866  | 0.013591 | 0.032421 | 0.017039 | GNAI1/CFT   |
| BP | GO:190590 | regulation   | 3/905  | 11/18866  | 0.013591 | 0.032421 | 0.017039 | DKK1/WNT    |
| BP | GO:199044 | positive re  | 3/905  | 11/18866  | 0.013591 | 0.032421 | 0.017039 | HSPA5/CEE   |
| BP | GO:200004 | positive re  | 3/905  | 11/18866  | 0.013591 | 0.032421 | 0.017039 | WNT5A/W     |
| BP | GO:200031 | positive re  | 3/905  | 11/18866  | 0.013591 | 0.032421 | 0.017039 | IL23A/IL12  |
| BP | GO:200055 | regulation   | 3/905  | 11/18866  | 0.013591 | 0.032421 | 0.017039 | XCL1/RSAD   |
| BP | GO:200066 | regulation   | 3/905  | 11/18866  | 0.013591 | 0.032421 | 0.017039 | CXCL12/CC   |
| BP | GO:000332 | type B pan   | 4/905  | 20/18866  | 0.013777 | 0.032721 | 0.017196 | WNT5A/GS    |
| BP | GO:001004 | response tr  | 4/905  | 20/18866  | 0.013777 | 0.032721 | 0.017196 | HSPA5/PTC   |
| BP | GO:001087 | positive re  | 4/905  | 20/18866  | 0.013777 | 0.032721 | 0.017196 | ADIPOQ/AI   |
| BP | GO:003125 | retinal gan  | 4/905  | 20/18866  | 0.013777 | 0.032721 | 0.017196 | VEGFA/SEM   |
| BP | GO:004393 | ossification | 4/905  | 20/18866  | 0.013777 | 0.032721 | 0.017196 | LTF/BMP2/   |
| BP | GO:004501 | negative re  | 4/905  | 20/18866  | 0.013777 | 0.032721 | 0.017196 | IL10/KHSRI  |
| BP | GO:006003 | pericardiur  | 4/905  | 20/18866  | 0.013777 | 0.032721 | 0.017196 | WNT5A/DL    |
| BP | GO:007107 | regulation   | 4/905  | 20/18866  | 0.013777 | 0.032721 | 0.017196 | FABP3/FPR   |
| BP | GO:190174 | positive re  | 4/905  | 20/18866  | 0.013777 | 0.032721 | 0.017196 | CXCL9/FLT:  |
| BP | GO:190440 | negative re  | 4/905  | 20/18866  | 0.013777 | 0.032721 | 0.017196 | IL10/KHSRI  |
| BP | GO:000864 | carbohydr    | 14/905 | 151/18866 | 0.013923 | 0.033054 | 0.017371 | IL1B/FABP:  |
| BP | GO:190336 | regulation   | 21/905 | 260/18866 | 0.01401  | 0.033245 | 0.017471 | HSP90AA1,   |
| BP | GO:000665 | steroid bio  | 17/905 | 197/18866 | 0.014132 | 0.033521 | 0.017616 | IFNG/NFYA   |
| BP | GO:004867 | response tr  | 9/905  | 80/18866  | 0.01423  | 0.033724 | 0.017723 | APOD/TNC    |
| BP | GO:005502 | regulation   | 9/905  | 80/18866  | 0.01423  | 0.033724 | 0.017723 | RBP4/IGF1,  |
| BP | GO:000026 | mitochond    | 6/905  | 42/18866  | 0.014367 | 0.034017 | 0.017877 | MX1/MAP1    |
| BP | GO:004662 | negative re  | 6/905  | 42/18866  | 0.014367 | 0.034017 | 0.017877 | RBP4/PTK2   |
| BP | GO:200125 | positive re  | 16/905 | 182/18866 | 0.014424 | 0.034138 | 0.017941 | IL1B/PML/A  |
| BP | GO:007061 | regulation   | 8/905  | 67/18866  | 0.014511 | 0.034313 | 0.018033 | SRC/MYH9    |
| BP | GO:190571 | positive re  | 8/905  | 67/18866  | 0.014511 | 0.034313 | 0.018033 | GSK3B/GZI   |
| BP | GO:004888 | sensory sy   | 29/905 | 394/18866 | 0.015026 | 0.035516 | 0.018665 | RBP4/VEGF   |
| BP | GO:000232 | natural kill | 5/905  | 31/18866  | 0.015116 | 0.035651 | 0.018736 | HLA-F/PGL'  |
| BP | GO:002177 | olfactory b  | 5/905  | 31/18866  | 0.015116 | 0.035651 | 0.018736 | WNT5A/SE    |
| BP | GO:004598 | positive re  | 5/905  | 31/18866  | 0.015116 | 0.035651 | 0.018736 | F2R/PTGS2   |
| BP | GO:006091 | heart form   | 5/905  | 31/18866  | 0.015116 | 0.035651 | 0.018736 | WNT5A/RC    |
| BP | GO:190018 | negative re  | 5/905  | 31/18866  | 0.015116 | 0.035651 | 0.018736 | APOD/CHP    |
| BP | GO:002176 | hippocamp    | 9/905  | 81/18866  | 0.015351 | 0.036188 | 0.019018 | HDAC1/GS    |
| BP | GO:005507 | transition r | 13/905 | 138/18866 | 0.015412 | 0.036318 | 0.019086 | B2M/IFNG,   |
| BP | GO:004230 | regulation   | 7/905  | 55/18866  | 0.015593 | 0.036727 | 0.019302 | IL1B/FABP:  |
| BP | GO:006132 | renal tubul  | 10/905 | 95/18866  | 0.015621 | 0.036779 | 0.019328 | STAT1/VEG   |
| BP | GO:009031 | negative re  | 6/905  | 43/18866  | 0.016038 | 0.037711 | 0.019818 | APOD/ADIF   |
| BP | GO:190103 | regulation   | 6/905  | 43/18866  | 0.016038 | 0.037711 | 0.019818 | TNF/IL10/N  |

|    |                         |        |           |          |          |          |            |
|----|-------------------------|--------|-----------|----------|----------|----------|------------|
| BP | GO:200064 positive re   | 6/905  | 43/18866  | 0.016038 | 0.037711 | 0.019818 | VEGFA/CX3  |
| BP | GO:003103 actomyosin    | 17/905 | 200/18866 | 0.016191 | 0.038054 | 0.019999 | NOX4/SRC,  |
| BP | GO:000236 alpha-beta    | 4/905  | 21/18866  | 0.016386 | 0.03823  | 0.020091 | CTSL/IL23A |
| BP | GO:000317 pulmonary     | 4/905  | 21/18866  | 0.016386 | 0.03823  | 0.020091 | ROBO2/JAC  |
| BP | GO:000911 vitamin bio   | 4/905  | 21/18866  | 0.016386 | 0.03823  | 0.020091 | IFNG/IL1B/ |
| BP | GO:003022 platelet for  | 4/905  | 21/18866  | 0.016386 | 0.03823  | 0.020091 | PTPN6/MY   |
| BP | GO:003261 interleukin   | 4/905  | 21/18866  | 0.016386 | 0.03823  | 0.020091 | IFNL1/TNF  |
| BP | GO:003592 steroid hor   | 4/905  | 21/18866  | 0.016386 | 0.03823  | 0.020091 | AGT/INHBA  |
| BP | GO:004369 reverse chr   | 4/905  | 21/18866  | 0.016386 | 0.03823  | 0.020091 | CETP/ABCA  |
| BP | GO:004682 negative re   | 4/905  | 21/18866  | 0.016386 | 0.03823  | 0.020091 | APOD/CHP   |
| BP | GO:004848 sympathetic   | 4/905  | 21/18866  | 0.016386 | 0.03823  | 0.020091 | SEMA3A/G   |
| BP | GO:006006 uterus dev    | 4/905  | 21/18866  | 0.016386 | 0.03823  | 0.020091 | RBP4/WNT   |
| BP | GO:006071 labyrinthin   | 4/905  | 21/18866  | 0.016386 | 0.03823  | 0.020091 | SOCS3/IL1C |
| BP | GO:190320 negative re   | 4/905  | 21/18866  | 0.016386 | 0.03823  | 0.020091 | IL10/NR4A  |
| BP | GO:190397 regulation    | 4/905  | 21/18866  | 0.016386 | 0.03823  | 0.020091 | CCL3/SPHK  |
| BP | GO:190488 beta-caten    | 4/905  | 21/18866  | 0.016386 | 0.03823  | 0.020091 | GSK3B/WN   |
| BP | GO:200004 regulation    | 4/905  | 21/18866  | 0.016386 | 0.03823  | 0.020091 | VEGFA/WN   |
| BP | GO:200038 regulation    | 4/905  | 21/18866  | 0.016386 | 0.03823  | 0.020091 | DKK1/WNT   |
| BP | GO:200073 positive re   | 4/905  | 21/18866  | 0.016386 | 0.03823  | 0.020091 | SEMA3C/P   |
| BP | GO:004648 phosphatic    | 16/905 | 185/18866 | 0.016617 | 0.038751 | 0.020365 | SOCS3/SOC  |
| BP | GO:190274 regulation    | 18/905 | 217/18866 | 0.0171   | 0.03986  | 0.020948 | HSPA2/HSF  |
| BP | GO:003003 lamellipodi   | 8/905  | 69/18866  | 0.01712  | 0.03989  | 0.020964 | VAV3/VAV   |
| BP | GO:000726 Rho protei    | 13/905 | 140/18866 | 0.017191 | 0.040037 | 0.021041 | F2R/F2RL1, |
| BP | GO:000916 nucleoside    | 5/905  | 32/18866  | 0.017227 | 0.040069 | 0.021058 | APOBEC3G   |
| BP | GO:005138 response tr   | 5/905  | 32/18866  | 0.017227 | 0.040069 | 0.021058 | CYBB/SRC/  |
| BP | GO:007129 cellular res  | 5/905  | 32/18866  | 0.017227 | 0.040069 | 0.021058 | IL15/PPAR  |
| BP | GO:000698 ER overloa    | 3/905  | 12/18866  | 0.017484 | 0.040236 | 0.021146 | HSPA5/GSF  |
| BP | GO:001023 vascular tr   | 3/905  | 12/18866  | 0.017484 | 0.040236 | 0.021146 | FABP5/CD3  |
| BP | GO:003273 positive re   | 3/905  | 12/18866  | 0.017484 | 0.040236 | 0.021146 | TNFSF4/IL3 |
| BP | GO:003295 inositol tris | 3/905  | 12/18866  | 0.017484 | 0.040236 | 0.021146 | PTK2B/PLC  |
| BP | GO:003369 positive re   | 3/905  | 12/18866  | 0.017484 | 0.040236 | 0.021146 | LTF/ITGAV, |
| BP | GO:003573 CD4-positi    | 3/905  | 12/18866  | 0.017484 | 0.040236 | 0.021146 | XCL1/ARG2  |
| BP | GO:003600 response tr   | 3/905  | 12/18866  | 0.017484 | 0.040236 | 0.021146 | TLR2/PTPN  |
| BP | GO:003600 cellular res  | 3/905  | 12/18866  | 0.017484 | 0.040236 | 0.021146 | TLR2/PTPN  |
| BP | GO:003646 TRAIL-activ   | 3/905  | 12/18866  | 0.017484 | 0.040236 | 0.021146 | TNFRSF10E  |
| BP | GO:004211 endothelia    | 3/905  | 12/18866  | 0.017484 | 0.040236 | 0.021146 | CXCL10/TG  |
| BP | GO:004330 negative re   | 3/905  | 12/18866  | 0.017484 | 0.040236 | 0.021146 | HLA-F/CD3  |
| BP | GO:004338 negative T    | 3/905  | 12/18866  | 0.017484 | 0.040236 | 0.021146 | CCR7/ZAP7  |
| BP | GO:004369 dedifferent   | 3/905  | 12/18866  | 0.017484 | 0.040236 | 0.021146 | PDGFB/ESF  |
| BP | GO:004369 cell dediffe  | 3/905  | 12/18866  | 0.017484 | 0.040236 | 0.021146 | PDGFB/ESF  |
| BP | GO:005154 positive re   | 3/905  | 12/18866  | 0.017484 | 0.040236 | 0.021146 | MMP9/FGF   |
| BP | GO:006045 regulation    | 3/905  | 12/18866  | 0.017484 | 0.040236 | 0.021146 | OXT/UCN/I  |
| BP | GO:006067 branching i   | 3/905  | 12/18866  | 0.017484 | 0.040236 | 0.021146 | SOCS3/IL1C |
| BP | GO:007026 pyroptosis    | 3/905  | 12/18866  | 0.017484 | 0.040236 | 0.021146 | AIM2/NLR   |
| BP | GO:007058 cell-cell ad  | 3/905  | 12/18866  | 0.017484 | 0.040236 | 0.021146 | ADIPOQ/IL  |
| BP | GO:007258 caveolin-m    | 3/905  | 12/18866  | 0.017484 | 0.040236 | 0.021146 | MAPK3/SR   |
| BP | GO:190011 extracellul   | 3/905  | 12/18866  | 0.017484 | 0.040236 | 0.021146 | LTBP1/GRE  |
| BP | GO:190011 extracellul   | 3/905  | 12/18866  | 0.017484 | 0.040236 | 0.021146 | LTBP1/GRE  |
| BP | GO:190396 positive re   | 3/905  | 12/18866  | 0.017484 | 0.040236 | 0.021146 | AGT/ITGB1  |
| BP | GO:190495 Wnt signali   | 3/905  | 12/18866  | 0.017484 | 0.040236 | 0.021146 | WNT5A/W    |

|    |           |              |        |           |          |          |          |            |
|----|-----------|--------------|--------|-----------|----------|----------|----------|------------|
| BP | GO:200056 | regulation   | 3/905  | 12/18866  | 0.017484 | 0.040236 | 0.021146 | XCL1/ARG2  |
| BP | GO:003167 | cellular res | 6/905  | 44/18866  | 0.017839 | 0.040984 | 0.021538 | IL15/PPAR  |
| BP | GO:003288 | regulation   | 6/905  | 44/18866  | 0.017839 | 0.040984 | 0.021538 | TGFB1/GSK  |
| BP | GO:004218 | ketone bio   | 6/905  | 44/18866  | 0.017839 | 0.040984 | 0.021538 | ADM/BMP    |
| BP | GO:190305 | regulation   | 6/905  | 44/18866  | 0.017839 | 0.040984 | 0.021538 | TGFB1/AG   |
| BP | GO:199082 | response to  | 10/905 | 97/18866  | 0.017863 | 0.041003 | 0.021549 | ICAM1/PM   |
| BP | GO:199083 | cellular res | 10/905 | 97/18866  | 0.017863 | 0.041003 | 0.021549 | ICAM1/PM   |
| BP | GO:003432 | cell junctio | 31/905 | 434/18866 | 0.017989 | 0.041274 | 0.021691 | TLR2/IL1B/ |
| BP | GO:003090 | hindbrain c  | 14/905 | 156/18866 | 0.018046 | 0.041389 | 0.021751 | HSPA5/SEN  |
| BP | GO:190198 | regulation   | 34/905 | 486/18866 | 0.018133 | 0.041559 | 0.021841 | HSPA2/HSF  |
| BP | GO:000758 | digestion    | 13/905 | 141/18866 | 0.018136 | 0.041559 | 0.021841 | RBP4/CHIT  |
| BP | GO:000602 | aminoglyca   | 15/905 | 172/18866 | 0.018655 | 0.04273  | 0.022456 | PGLYRP1/P  |
| BP | GO:003052 | intracellula | 7/905  | 57/18866  | 0.018719 | 0.042823 | 0.022505 | SRC/AR/ES  |
| BP | GO:006100 | cell differ  | 7/905  | 57/18866  | 0.018719 | 0.042823 | 0.022505 | MMP9/ADI   |
| BP | GO:007053 | protein K6   | 7/905  | 57/18866  | 0.018719 | 0.042823 | 0.022505 | TRAF3/TRII |
| BP | GO:005101 | actin filam  | 14/905 | 157/18866 | 0.018972 | 0.043383 | 0.022799 | NOX4/SRC,  |
| BP | GO:001701 | regulation   | 12/905 | 127/18866 | 0.019041 | 0.043522 | 0.022872 | HSPA5/HSF  |
| BP | GO:001056 | positive re  | 4/905  | 22/18866  | 0.019285 | 0.043931 | 0.023087 | IL15/CCR7/ |
| BP | GO:003410 | negative re  | 4/905  | 22/18866  | 0.019285 | 0.043931 | 0.023087 | TNFAIP3/A  |
| BP | GO:003558 | calcium-m    | 4/905  | 22/18866  | 0.019285 | 0.043931 | 0.023087 | DEFB1/CCL  |
| BP | GO:003634 | platelet mc  | 4/905  | 22/18866  | 0.019285 | 0.043931 | 0.023087 | PTPN6/MY   |
| BP | GO:004235 | vitamin D r  | 4/905  | 22/18866  | 0.019285 | 0.043931 | 0.023087 | IFNG/IL1B/ |
| BP | GO:004245 | ribonucleo   | 4/905  | 22/18866  | 0.019285 | 0.043931 | 0.023087 | APOBEC3G   |
| BP | GO:004336 | CD4-positi   | 4/905  | 22/18866  | 0.019285 | 0.043931 | 0.023087 | CTSL/IL23A |
| BP | GO:004565 | regulation   | 4/905  | 22/18866  | 0.019285 | 0.043931 | 0.023087 | CD4/IRF7/I |
| BP | GO:000333 | metaneph     | 5/905  | 33/18866  | 0.019523 | 0.044343 | 0.023304 | STAT1/PDC  |
| BP | GO:000995 | proximal/d   | 5/905  | 33/18866  | 0.019523 | 0.044343 | 0.023304 | FGF10/GRE  |
| BP | GO:001003 | response to  | 5/905  | 33/18866  | 0.019523 | 0.044343 | 0.023304 | B2M/NFYA   |
| BP | GO:001046 | regulation   | 5/905  | 33/18866  | 0.019523 | 0.044343 | 0.023304 | STAT1/VEC  |
| BP | GO:001095 | negative re  | 5/905  | 33/18866  | 0.019523 | 0.044343 | 0.023304 | LRRK2/SER  |
| BP | GO:004592 | negative re  | 5/905  | 33/18866  | 0.019523 | 0.044343 | 0.023304 | HLA-F/TRIM |
| BP | GO:190331 | negative re  | 5/905  | 33/18866  | 0.019523 | 0.044343 | 0.023304 | LRRK2/SER  |
| BP | GO:000319 | endocardia   | 6/905  | 45/18866  | 0.019774 | 0.044857 | 0.023574 | ROBO2/BM   |
| BP | GO:000677 | fat-soluble  | 6/905  | 45/18866  | 0.019774 | 0.044857 | 0.023574 | IFNG/RBP1  |
| BP | GO:001067 | negative re  | 6/905  | 45/18866  | 0.019774 | 0.044857 | 0.023574 | ADIPOQ/G   |
| BP | GO:003020 | glycosamin   | 14/905 | 158/18866 | 0.019933 | 0.045198 | 0.023753 | PGLYRP1/P  |
| BP | GO:003237 | regulation   | 8/905  | 71/18866  | 0.020051 | 0.045446 | 0.023884 | CETP/ADIP  |
| BP | GO:003530 | positive re  | 7/905  | 58/18866  | 0.020437 | 0.046302 | 0.024333 | HSP90AB1,  |
| BP | GO:001050 | negative re  | 9/905  | 85/18866  | 0.020485 | 0.046352 | 0.02436  | IL10/PTK2/ |
| BP | GO:004584 | positive re  | 9/905  | 85/18866  | 0.020485 | 0.046352 | 0.02436  | TGFB1/GRE  |
| BP | GO:004863 | positive re  | 9/905  | 85/18866  | 0.020485 | 0.046352 | 0.02436  | TGFB1/GRE  |
| BP | GO:005506 | monovalen    | 14/905 | 159/18866 | 0.02093  | 0.047321 | 0.024869 | MAPK3/SL   |
| BP | GO:200005 | regulation   | 14/905 | 159/18866 | 0.02093  | 0.047321 | 0.024869 | HSP90AB1,  |
| BP | GO:199074 | cellular det | 11/905 | 114/18866 | 0.021006 | 0.047471 | 0.024948 | S100A9/DL  |
| BP | GO:015006 | visual syste | 28/905 | 388/18866 | 0.021018 | 0.047479 | 0.024952 | RBP4/VEGF  |
| BP | GO:190384 | regulation   | 12/905 | 129/18866 | 0.021261 | 0.048009 | 0.02523  | HSPA5/HSF  |
| BP | GO:001076 | fibroblast   | 6/905  | 46/18866  | 0.021847 | 0.049054 | 0.02578  | TGFB1/PM   |
| BP | GO:003164 | regulation   | 6/905  | 46/18866  | 0.021847 | 0.049054 | 0.02578  | S100B/TYM  |
| BP | GO:006102 | establishm   | 6/905  | 46/18866  | 0.021847 | 0.049054 | 0.02578  | ICAM1/IL1I |
| BP | GO:000263 | negative re  | 3/905  | 13/18866  | 0.021933 | 0.049054 | 0.02578  | CD22/IL33, |



|    |                               |           |          |          |          |             |
|----|-------------------------------|-----------|----------|----------|----------|-------------|
| BP | GO:000267 negative re 3/905   | 13/18866  | 0.021933 | 0.049054 | 0.02578  | PPARG/IL2   |
| BP | GO:000292 negative re 3/905   | 13/18866  | 0.021933 | 0.049054 | 0.02578  | SPINK5/PTI  |
| BP | GO:000333 mesenchy 3/905      | 13/18866  | 0.021933 | 0.049054 | 0.02578  | STAT1/GDI   |
| BP | GO:000749 midgut dev 3/905    | 13/18866  | 0.021933 | 0.049054 | 0.02578  | WNT5A/EC    |
| BP | GO:001064 negative re 3/905   | 13/18866  | 0.021933 | 0.049054 | 0.02578  | APOD/ADIF   |
| BP | GO:001087 positive re 3/905   | 13/18866  | 0.021933 | 0.049054 | 0.02578  | IFNG/HDAC   |
| BP | GO:001580 arginine tr 3/905   | 13/18866  | 0.021933 | 0.049054 | 0.02578  | SLC11A1/A   |
| BP | GO:003166 negative re 3/905   | 13/18866  | 0.021933 | 0.049054 | 0.02578  | LTF/TNFAIF  |
| BP | GO:003195 negative re 3/905   | 13/18866  | 0.021933 | 0.049054 | 0.02578  | ADIPOQ/CI   |
| BP | GO:003242 regulation 3/905    | 13/18866  | 0.021933 | 0.049054 | 0.02578  | AGTR1/EGI   |
| BP | GO:003308 positive re 3/905   | 13/18866  | 0.021933 | 0.049054 | 0.02578  | IL1B/IL7R/I |
| BP | GO:003314 positive re 3/905   | 13/18866  | 0.021933 | 0.049054 | 0.02578  | AR/PAK1/S   |
| BP | GO:004557 positive re 3/905   | 13/18866  | 0.021933 | 0.049054 | 0.02578  | BTK/CD27/   |
| BP | GO:004830 regulation 3/905    | 13/18866  | 0.021933 | 0.049054 | 0.02578  | CD40/IL27I  |
| BP | GO:004871 positive re 3/905   | 13/18866  | 0.021933 | 0.049054 | 0.02578  | BMP2/CLCI   |
| BP | GO:006031 regulation 3/905    | 13/18866  | 0.021933 | 0.049054 | 0.02578  | TGFB1/FLT   |
| BP | GO:006102 eyelid dev 3/905    | 13/18866  | 0.021933 | 0.049054 | 0.02578  | HDAC1/INH   |
| BP | GO:006146 regulation 3/905    | 13/18866  | 0.021933 | 0.049054 | 0.02578  | NR4A1/NR    |
| BP | GO:190499 negative re 3/905   | 13/18866  | 0.021933 | 0.049054 | 0.02578  | CXCL12/CC   |
| BP | GO:001076 regulation 5/905    | 34/18866  | 0.022012 | 0.049109 | 0.025808 | TGFB1/PTK   |
| BP | GO:001092 positive re 5/905   | 34/18866  | 0.022012 | 0.049109 | 0.025808 | HSP90AB1,   |
| BP | GO:003551 DNA dealk 5/905     | 34/18866  | 0.022012 | 0.049109 | 0.025808 | APOBEC3G    |
| BP | GO:003563 mainten 5/905       | 34/18866  | 0.022012 | 0.049109 | 0.025808 | VEGFA/PTC   |
| BP | GO:005502 negative re 5/905   | 34/18866  | 0.022012 | 0.049109 | 0.025808 | RBP4/PAK1   |
| BP | GO:006111 negative re 5/905   | 34/18866  | 0.022012 | 0.049109 | 0.025808 | RBP4/PAK1   |
| BP | GO:000165 branching i 7/905   | 59/18866  | 0.022261 | 0.049583 | 0.026057 | VEGFA/AG    |
| BP | GO:004352 positive re 7/905   | 59/18866  | 0.022261 | 0.049583 | 0.026057 | TNF/FASLG   |
| BP | GO:004645 icosanoid t 7/905   | 59/18866  | 0.022261 | 0.049583 | 0.026057 | PTGDS/IL1I  |
| BP | GO:007138 cellular res 7/905  | 59/18866  | 0.022261 | 0.049583 | 0.026057 | ICAM1/STC   |
| BP | GO:000801 regulation 20/905   | 256/18866 | 0.022356 | 0.049774 | 0.026158 | S100A1/DE   |
| BP | GO:000205 positive re 4/905   | 23/18866  | 0.02248  | 0.049784 | 0.026164 | VEGFA/CX3   |
| BP | GO:000659 thyroid hor 4/905   | 23/18866  | 0.02248  | 0.049784 | 0.026164 | CTSB/DUO    |
| BP | GO:001022 response tr 4/905   | 23/18866  | 0.02248  | 0.049784 | 0.026164 | CALR/PTGS   |
| BP | GO:003516 embryonic 4/905     | 23/18866  | 0.02248  | 0.049784 | 0.026164 | VEGFA/FLT   |
| BP | GO:005086 negative re 4/905   | 23/18866  | 0.02248  | 0.049784 | 0.026164 | PTPN6/SH2   |
| BP | GO:006014 negative re 4/905   | 23/18866  | 0.02248  | 0.049784 | 0.026164 | TGFB1/TNF   |
| BP | GO:006096 negative re 4/905   | 23/18866  | 0.02248  | 0.049784 | 0.026164 | TGFB1/TNF   |
| BP | GO:007097 bone matu 4/905     | 23/18866  | 0.02248  | 0.049784 | 0.026164 | LTF/BMP2/   |
| BP | GO:007130 cellular res 4/905  | 23/18866  | 0.02248  | 0.049784 | 0.026164 | IL15/VDR/I  |
| BP | GO:190103 negative re 4/905   | 23/18866  | 0.02248  | 0.049784 | 0.026164 | IL10/MET/I  |
| BP | GO:190152 positive re 4/905   | 23/18866  | 0.02248  | 0.049784 | 0.026164 | NFYA/VEGI   |
| BP | GO:190320 negative re 4/905   | 23/18866  | 0.02248  | 0.049784 | 0.026164 | IL10/MET/I  |
| BP | GO:200072 negative re 4/905   | 23/18866  | 0.02248  | 0.049784 | 0.026164 | BMP2/DKK    |
| BP | GO:004483 cell cycle G 21/905 | 273/18866 | 0.022825 | 0.050527 | 0.026554 | HSPA2/HSF   |
| BP | GO:006157 actin filam 14/905  | 161/18866 | 0.023037 | 0.050975 | 0.026789 | NOX4/SRC,   |
| BP | GO:005196 regulation 8/905    | 73/18866  | 0.023321 | 0.051583 | 0.027109 | TNF/PTGS2   |
| BP | GO:003243 positive re 9/905   | 87/18866  | 0.02347  | 0.051807 | 0.027226 | PSMD10/G    |
| BP | GO:004801 ephrin rec 9/905    | 87/18866  | 0.02347  | 0.051807 | 0.027226 | MMP9/SRC    |
| BP | GO:006029 long-term : 9/905   | 87/18866  | 0.02347  | 0.051807 | 0.027226 | S100B/AGE   |
| BP | GO:006042 regulation 9/905    | 87/18866  | 0.02347  | 0.051807 | 0.027226 | RBP4/IGF1,  |

|    |                               |           |          |          |          |            |
|----|-------------------------------|-----------|----------|----------|----------|------------|
| BP | GO:009758 lamellipodi 9/905   | 87/18866  | 0.02347  | 0.051807 | 0.027226 | SRC/VAV3/  |
| BP | GO:002241 cellular prc 27/905 | 375/18866 | 0.023729 | 0.052356 | 0.027515 | HSPA2/DEF  |
| BP | GO:003057 collagen ca 6/905   | 47/18866  | 0.024062 | 0.053005 | 0.027856 | CTSB/CTSL, |
| BP | GO:004593 positive re 6/905   | 47/18866  | 0.024062 | 0.053005 | 0.027856 | F2R/PTGS2  |
| BP | GO:190473 vascular as 6/905   | 47/18866  | 0.024062 | 0.053005 | 0.027856 | ADIPOQ/AI  |
| BP | GO:190475 regulation 6/905    | 47/18866  | 0.024062 | 0.053005 | 0.027856 | ADIPOQ/AI  |
| BP | GO:001082 negative re 7/905   | 60/18866  | 0.024194 | 0.053253 | 0.027987 | PSMD10/T   |
| BP | GO:003590 aorta deve 7/905    | 60/18866  | 0.024194 | 0.053253 | 0.027987 | DLL4/PDGF  |
| BP | GO:002260 digestive sy 10/905 | 102/18866 | 0.024493 | 0.053866 | 0.028308 | RBP4/MUC   |
| BP | GO:011002 regulation 10/905   | 102/18866 | 0.024493 | 0.053866 | 0.028308 | NOX4/PIK3  |
| BP | GO:200102 regulation 18/905   | 226/18866 | 0.024636 | 0.054159 | 0.028463 | PSMD10/C   |
| BP | GO:003026 apoptotic r 5/905   | 35/18866  | 0.024697 | 0.054162 | 0.028464 | ACVR1C/GI  |
| BP | GO:003094 regulation 5/905    | 35/18866  | 0.024697 | 0.054162 | 0.028464 | IL1B/FGF10 |
| BP | GO:003368 osteoblast 5/905    | 35/18866  | 0.024697 | 0.054162 | 0.028464 | LTF/ITGAV, |
| BP | GO:006025 regulation 5/905    | 35/18866  | 0.024697 | 0.054162 | 0.028464 | LTA/IL1B/T |
| BP | GO:007088 regulation 5/905    | 35/18866  | 0.024697 | 0.054162 | 0.028464 | TNF/CHP1/  |
| BP | GO:190403 positive re 5/905   | 35/18866  | 0.024697 | 0.054162 | 0.028464 | HSP90AB1,  |
| BP | GO:003202 positive re 8/905   | 74/18866  | 0.02509  | 0.055    | 0.028904 | RBP4/ARRE  |
| BP | GO:000318 atrioventri 4/905   | 24/18866  | 0.02598  | 0.056813 | 0.029857 | BMP2/ZFPI  |
| BP | GO:004432 response tr 4/905   | 24/18866  | 0.02598  | 0.056813 | 0.029857 | EBI3/LEPR/ |
| BP | GO:004582 positive re 4/905   | 24/18866  | 0.02598  | 0.056813 | 0.029857 | IFNG/IGF1/ |
| BP | GO:009874 cell aggreg 4/905   | 24/18866  | 0.02598  | 0.056813 | 0.029857 | LTF/BPIFA1 |
| BP | GO:190299 positive re 4/905   | 24/18866  | 0.02598  | 0.056813 | 0.029857 | IFNG/TNF/. |
| BP | GO:190330 negative re 4/905   | 24/18866  | 0.02598  | 0.056813 | 0.029857 | HLA-F/TRIM |
| BP | GO:000854 fibroblast g 11/905 | 118/18866 | 0.026349 | 0.057596 | 0.030269 | MAPK3/WI   |
| BP | GO:004560 regulation 6/905    | 48/18866  | 0.026422 | 0.057686 | 0.030316 | IL1B/TNF/\ |
| BP | GO:005197 regulation 6/905    | 48/18866  | 0.026422 | 0.057686 | 0.030316 | HSP90AA1,  |
| BP | GO:005501 ventricular 6/905   | 48/18866  | 0.026422 | 0.057686 | 0.030316 | TGFB1/DLL  |
| BP | GO:000176 neuron mi 14/905    | 164/18866 | 0.026489 | 0.057785 | 0.030368 | CXCL12/VE  |
| BP | GO:004616 alcohol bio 14/905  | 164/18866 | 0.026489 | 0.057785 | 0.030368 | IFNG/NFYA  |
| BP | GO:005500 cardiac cell 9/905  | 89/18866  | 0.026754 | 0.05825  | 0.030613 | VEGFA/PDC  |
| BP | GO:000177 immunolog 3/905     | 14/18866  | 0.026939 | 0.05825  | 0.030613 | CCR7/PRF1  |
| BP | GO:001087 regulation 3/905    | 14/18866  | 0.026939 | 0.05825  | 0.030613 | AGT/AGTR   |
| BP | GO:001487 response tr 3/905   | 14/18866  | 0.026939 | 0.05825  | 0.030613 | AGT/PPAR   |
| BP | GO:001989 axonal tran 3/905   | 14/18866  | 0.026939 | 0.05825  | 0.030613 | MAPT/HIF1  |
| BP | GO:003543 maintenanc 3/905    | 14/18866  | 0.026939 | 0.05825  | 0.030613 | HSPA5/PDI  |
| BP | GO:003581 positive re 3/905   | 14/18866  | 0.026939 | 0.05825  | 0.030613 | EDNRB/BT0  |
| BP | GO:003816 angiotensin 3/905   | 14/18866  | 0.026939 | 0.05825  | 0.030613 | SRC/AGTR1  |
| BP | GO:004505 positive th 3/905   | 14/18866  | 0.026939 | 0.05825  | 0.030613 | ZAP70/CD3  |
| BP | GO:004547 response tr 3/905   | 14/18866  | 0.026939 | 0.05825  | 0.030613 | OXT/CDK4,  |
| BP | GO:004600 negative re 3/905   | 14/18866  | 0.026939 | 0.05825  | 0.030613 | ARG1/CD2   |
| BP | GO:004632 positive re 3/905   | 14/18866  | 0.026939 | 0.05825  | 0.030613 | PPARG/NR.  |
| BP | GO:005096 detection c 3/905   | 14/18866  | 0.026939 | 0.05825  | 0.030613 | CXCL12/CX  |
| BP | GO:005154 regulation 3/905    | 14/18866  | 0.026939 | 0.05825  | 0.030613 | MMP9/FGF   |
| BP | GO:007136 cellular res 3/905  | 14/18866  | 0.026939 | 0.05825  | 0.030613 | CYBB/CCL7  |
| BP | GO:009023 regulation 3/905    | 14/18866  | 0.026939 | 0.05825  | 0.030613 | ARRB1/ML   |
| BP | GO:190172 regulation 3/905    | 14/18866  | 0.026939 | 0.05825  | 0.030613 | PDGFB/PDC  |
| BP | GO:190289 negative re 3/905   | 14/18866  | 0.026939 | 0.05825  | 0.030613 | PDGFB/PPA  |
| BP | GO:200054 positive re 3/905   | 14/18866  | 0.026939 | 0.05825  | 0.030613 | WNT3A/GJ   |
| BP | GO:001590 long-chain 8/905    | 75/18866  | 0.026949 | 0.05825  | 0.030613 | FABP5/FAE  |

|    |           |               |        |           |          |          |          |            |
|----|-----------|---------------|--------|-----------|----------|----------|----------|------------|
| BP | GO:003241 | lysosome l    | 8/905  | 75/18866  | 0.026949 | 0.05825  | 0.030613 | FCER1G/BT  |
| BP | GO:003314 | regulation    | 8/905  | 75/18866  | 0.026949 | 0.05825  | 0.030613 | CALR/SRC/  |
| BP | GO:007208 | nephron e     | 8/905  | 75/18866  | 0.026949 | 0.05825  | 0.030613 | STAT1/VEG  |
| BP | GO:003105 | regulation    | 13/905 | 149/18866 | 0.02717  | 0.058703 | 0.030851 | IL1B/VEGF/ |
| BP | GO:001054 | regulation    | 5/905  | 36/18866  | 0.027584 | 0.059482 | 0.03126  | FCER1G/PL  |
| BP | GO:002195 | central ner   | 5/905  | 36/18866  | 0.027584 | 0.059482 | 0.03126  | HSP90AA1,  |
| BP | GO:009031 | regulation    | 5/905  | 36/18866  | 0.027584 | 0.059482 | 0.03126  | CHP1/ITGB  |
| BP | GO:010605 | regulation    | 5/905  | 36/18866  | 0.027584 | 0.059482 | 0.03126  | TNF/CHP1/  |
| BP | GO:003223 | regulation    | 10/905 | 104/18866 | 0.027585 | 0.059482 | 0.03126  | NOX4/PIK3  |
| BP | GO:000595 | monosaccl     | 22/905 | 296/18866 | 0.028353 | 0.061114 | 0.032118 | RBP4/FABF  |
| BP | GO:000611 | regulation    | 6/905  | 49/18866  | 0.02893  | 0.062233 | 0.032706 | ADIPOQ/F/  |
| BP | GO:000755 | lactation     | 6/905  | 49/18866  | 0.02893  | 0.062233 | 0.032706 | VEGFA/VDI  |
| BP | GO:004851 | circadian b   | 6/905  | 49/18866  | 0.02893  | 0.062233 | 0.032706 | PTGDS/CSF  |
| BP | GO:006071 | labyrinthin   | 6/905  | 49/18866  | 0.02893  | 0.062233 | 0.032706 | SOCS3/IL1C |
| BP | GO:009772 | calcineurin   | 6/905  | 49/18866  | 0.02893  | 0.062233 | 0.032706 | TNF/CHP1/  |
| BP | GO:000762 | locomotor     | 16/905 | 198/18866 | 0.029202 | 0.062793 | 0.033    | CXCL12/IDI |
| BP | GO:002154 | cerebellum    | 10/905 | 105/18866 | 0.029232 | 0.062807 | 0.033007 | HSPA5/SEN  |
| BP | GO:006201 | negative re   | 10/905 | 105/18866 | 0.029232 | 0.062807 | 0.033007 | TGFB1/ADI  |
| BP | GO:000205 | positive re   | 4/905  | 25/18866  | 0.029788 | 0.063799 | 0.033529 | STAT1/VEG  |
| BP | GO:000330 | type B pan    | 4/905  | 25/18866  | 0.029788 | 0.063799 | 0.033529 | WNT5A/GS   |
| BP | GO:001482 | vascular as   | 4/905  | 25/18866  | 0.029788 | 0.063799 | 0.033529 | EDN3/EDN   |
| BP | GO:003416 | toll-like rec | 4/905  | 25/18866  | 0.029788 | 0.063799 | 0.033529 | TLR8/RSAD  |
| BP | GO:005085 | positive re   | 4/905  | 25/18866  | 0.029788 | 0.063799 | 0.033529 | CCR7/CARI  |
| BP | GO:006057 | intestinal e  | 4/905  | 25/18866  | 0.029788 | 0.063799 | 0.033529 | SRC/IL6ST/ |
| BP | GO:006214 | detection c   | 4/905  | 25/18866  | 0.029788 | 0.063799 | 0.033529 | CXCL12/CX  |
| BP | GO:200067 | positive re   | 4/905  | 25/18866  | 0.029788 | 0.063799 | 0.033529 | IFNG/TGFB  |
| BP | GO:003090 | midbrain d    | 9/905  | 91/18866  | 0.030348 | 0.064876 | 0.034095 | HSPA5/S1C  |
| BP | GO:004247 | odontogen     | 9/905  | 91/18866  | 0.030348 | 0.064876 | 0.034095 | HDAC1/FG   |
| BP | GO:004568 | regulation    | 9/905  | 91/18866  | 0.030348 | 0.064876 | 0.034095 | CTSL/TNF/  |
| BP | GO:004847 | oogenesis     | 9/905  | 91/18866  | 0.030348 | 0.064876 | 0.034095 | SRC/PTX3/  |
| BP | GO:004301 | camera-tyr    | 24/905 | 332/18866 | 0.03035  | 0.064876 | 0.034095 | RBP4/VEGF  |
| BP | GO:000692 | cellular cor  | 5/905  | 37/18866  | 0.030677 | 0.065448 | 0.034396 | ACVR1C/GI  |
| BP | GO:003271 | negative re   | 5/905  | 37/18866  | 0.030677 | 0.065448 | 0.034396 | TMSB4X/A   |
| BP | GO:004507 | positive re   | 5/905  | 37/18866  | 0.030677 | 0.065448 | 0.034396 | PPIA/CCL5/ |
| BP | GO:005185 | regulation    | 7/905  | 63/18866  | 0.030679 | 0.065448 | 0.034396 | APOD/VEG   |
| BP | GO:009010 | regulation    | 7/905  | 63/18866  | 0.030679 | 0.065448 | 0.034396 | APOD/VEG   |
| BP | GO:000721 | neuropepti    | 10/905 | 106/18866 | 0.030946 | 0.065907 | 0.034636 | CYSLTR1/C  |
| BP | GO:003241 | positive re   | 10/905 | 106/18866 | 0.030946 | 0.065907 | 0.034636 | HSPA2/IFN  |
| BP | GO:004690 | regulation    | 8/905  | 77/18866  | 0.030952 | 0.065907 | 0.034636 | GSK3B/GZI  |
| BP | GO:006133 | renal tubul   | 8/905  | 77/18866  | 0.030952 | 0.065907 | 0.034636 | VEGFA/AG   |
| BP | GO:012025 | olefinic cor  | 11/905 | 121/18866 | 0.030955 | 0.065907 | 0.034636 | PTGDS/MA   |
| BP | GO:000762 | rhythmic b    | 6/905  | 50/18866  | 0.03159  | 0.067207 | 0.03532  | PTGDS/CSF  |
| BP | GO:004298 | amyloid pr    | 6/905  | 50/18866  | 0.03159  | 0.067207 | 0.03532  | IFNG/TNF/  |
| BP | GO:000995 | dorsal/ven    | 9/905  | 92/18866  | 0.032266 | 0.068575 | 0.036039 | DLL4/GREN  |
| BP | GO:001045 | positive re   | 3/905  | 15/18866  | 0.0325   | 0.068575 | 0.036039 | IL23A/IL12 |
| BP | GO:002192 | cell prolife  | 3/905  | 15/18866  | 0.0325   | 0.068575 | 0.036039 | EGF/RORA,  |
| BP | GO:002193 | cerebellar    | 3/905  | 15/18866  | 0.0325   | 0.068575 | 0.036039 | EGF/RORA,  |
| BP | GO:003085 | regulation    | 3/905  | 15/18866  | 0.0325   | 0.068575 | 0.036039 | ADIPOQ/C:  |
| BP | GO:003227 | gonadotrop    | 3/905  | 15/18866  | 0.0325   | 0.068575 | 0.036039 | INHA/INH   |
| BP | GO:003315 | V(D)J recor   | 3/905  | 15/18866  | 0.0325   | 0.068575 | 0.036039 | PRKDC/RA   |

|    |           |                     |           |          |          |          |            |
|----|-----------|---------------------|-----------|----------|----------|----------|------------|
| BP | GO:003434 | glial cell ap 3/905 | 15/18866  | 0.0325   | 0.068575 | 0.036039 | CCL2/PRKC  |
| BP | GO:004506 | T-helper 2 3/905    | 15/18866  | 0.0325   | 0.068575 | 0.036039 | TNFSF4/CD  |
| BP | GO:004534 | regulation 3/905    | 15/18866  | 0.0325   | 0.068575 | 0.036039 | IFNG/IL10/ |
| BP | GO:004547 | locomotor 3/905     | 15/18866  | 0.0325   | 0.068575 | 0.036039 | USP2/MTA   |
| BP | GO:004583 | negative re 3/905   | 15/18866  | 0.0325   | 0.068575 | 0.036039 | MAPT/PTN   |
| BP | GO:004848 | enteric ner 3/905   | 15/18866  | 0.0325   | 0.068575 | 0.036039 | EDNRA/ED   |
| BP | GO:005086 | positive re 3/905   | 15/18866  | 0.0325   | 0.068575 | 0.036039 | CCR7/CARI  |
| BP | GO:005505 | neuroblast 3/905    | 15/18866  | 0.0325   | 0.068575 | 0.036039 | WNT3A/AK   |
| BP | GO:006034 | heart trabe 3/905   | 15/18866  | 0.0325   | 0.068575 | 0.036039 | RBP4/TEK/  |
| BP | GO:006039 | positive re 3/905   | 15/18866  | 0.0325   | 0.068575 | 0.036039 | TGFB1/TGF  |
| BP | GO:007256 | chemokine 3/905     | 15/18866  | 0.0325   | 0.068575 | 0.036039 | TNF/F2RL1  |
| BP | GO:200034 | regulation 3/905    | 15/18866  | 0.0325   | 0.068575 | 0.036039 | TNF/F2RL1  |
| BP | GO:200040 | negative re 3/905   | 15/18866  | 0.0325   | 0.068575 | 0.036039 | APOD/CCL   |
| BP | GO:200117 | positive re 3/905   | 15/18866  | 0.0325   | 0.068575 | 0.036039 | TMSB4X/PI  |
| BP | GO:009723 | cellular res 11/905 | 122/18866 | 0.03261  | 0.068781 | 0.036147 | S100A9/DL  |
| BP | GO:000001 | regulation 10/905   | 107/18866 | 0.032731 | 0.068956 | 0.036239 | TGFB1/TFR  |
| BP | GO:004852 | positive re 10/905  | 107/18866 | 0.032731 | 0.068956 | 0.036239 | CD4/PPIA/I |
| BP | GO:009917 | regulation 10/905   | 107/18866 | 0.032731 | 0.068956 | 0.036239 | WNT5A/PT   |
| BP | GO:200004 | regulation 15/905   | 185/18866 | 0.033099 | 0.069703 | 0.036632 | PSME2/PM   |
| BP | GO:000178 | B cell apop 4/905   | 26/18866  | 0.033908 | 0.070938 | 0.03728  | IL10/MIF/E |
| BP | GO:000222 | innate imm 4/905    | 26/18866  | 0.033908 | 0.070938 | 0.03728  | DEFB1/LTF  |
| BP | GO:000317 | atrioventri 4/905   | 26/18866  | 0.033908 | 0.070938 | 0.03728  | BMP2/ZFPI  |
| BP | GO:001943 | removal of 4/905    | 26/18866  | 0.033908 | 0.070938 | 0.03728  | TNF/MPO/   |
| BP | GO:003081 | positive re 4/905   | 26/18866  | 0.033908 | 0.070938 | 0.03728  | TMSB4X/N   |
| BP | GO:003631 | cellular res 4/905  | 26/18866  | 0.033908 | 0.070938 | 0.03728  | INHBA/ROI  |
| BP | GO:004240 | thyroid hor 4/905   | 26/18866  | 0.033908 | 0.070938 | 0.03728  | CTSB/DUO   |
| BP | GO:004356 | regulation 4/905    | 26/18866  | 0.033908 | 0.070938 | 0.03728  | BMP2/BMF   |
| BP | GO:006034 | trabecula f 4/905   | 26/18866  | 0.033908 | 0.070938 | 0.03728  | RBP4/GRE   |
| BP | GO:006039 | regulation 4/905    | 26/18866  | 0.033908 | 0.070938 | 0.03728  | TGFB1/GDI  |
| BP | GO:006056 | apoptotic p 4/905   | 26/18866  | 0.033908 | 0.070938 | 0.03728  | VDR/JAG2/  |
| BP | GO:007063 | transepith 4/905    | 26/18866  | 0.033908 | 0.070938 | 0.03728  | EDNRB/CSI  |
| BP | GO:007142 | hematopoi 4/905     | 26/18866  | 0.033908 | 0.070938 | 0.03728  | EIF2AK2/W  |
| BP | GO:007227 | metaneph 4/905      | 26/18866  | 0.033908 | 0.070938 | 0.03728  | STAT1/PDC  |
| BP | GO:009706 | response tr 4/905   | 26/18866  | 0.033908 | 0.070938 | 0.03728  | CTSB/CTSL  |
| BP | GO:190037 | positive re 4/905   | 26/18866  | 0.033908 | 0.070938 | 0.03728  | TMSB4X/N   |
| BP | GO:190302 | positive re 4/905   | 26/18866  | 0.033908 | 0.070938 | 0.03728  | IL15/CCR7/ |
| BP | GO:000329 | physiologic 5/905   | 38/18866  | 0.033979 | 0.07095  | 0.037287 | AGT/IGF1/I |
| BP | GO:000330 | physiologic 5/905   | 38/18866  | 0.033979 | 0.07095  | 0.037287 | AGT/IGF1/I |
| BP | GO:001943 | triglyceride 5/905  | 38/18866  | 0.033979 | 0.07095  | 0.037287 | FABP6/FAE  |
| BP | GO:006104 | cell growth 5/905   | 38/18866  | 0.033979 | 0.07095  | 0.037287 | AGT/IGF1/I |
| BP | GO:190589 | positive re 5/905   | 38/18866  | 0.033979 | 0.07095  | 0.037287 | PIK3R1/PV  |
| BP | GO:007208 | nephron tu 9/905    | 93/18866  | 0.034267 | 0.071523 | 0.037588 | STAT1/VEC  |
| BP | GO:000602 | glycosamin 10/905   | 108/18866 | 0.034586 | 0.072162 | 0.037924 | TGFB1/IL1F |
| BP | GO:000682 | iron ion tra 8/905  | 79/18866  | 0.035343 | 0.073655 | 0.038708 | B2M/IFNG,  |
| BP | GO:000749 | endoderm 8/905      | 79/18866  | 0.035343 | 0.073655 | 0.038708 | MMP9/ITG   |
| BP | GO:003010 | water hom 8/905     | 79/18866  | 0.035343 | 0.073655 | 0.038708 | BPIFA1/CLI |
| BP | GO:000694 | regulation 7/905    | 65/18866  | 0.035596 | 0.074124 | 0.038955 | F2R/PTGS2  |
| BP | GO:006067 | ureteric bu 7/905   | 65/18866  | 0.035596 | 0.074124 | 0.038955 | VEGFA/AG   |
| BP | GO:001895 | phenol-cor 10/905   | 109/18866 | 0.036514 | 0.076008 | 0.039945 | CTSB/DUO   |
| BP | GO:006042 | lung morp 6/905     | 52/18866  | 0.037376 | 0.077742 | 0.040856 | TNF/MAPK   |

|    |           |              |        |           |          |          |          |             |
|----|-----------|--------------|--------|-----------|----------|----------|----------|-------------|
| BP | GO:200067 | regulation   | 6/905  | 52/18866  | 0.037376 | 0.077742 | 0.040856 | IFNG/TMSE   |
| BP | GO:000166 | behavioral   | 5/905  | 39/18866  | 0.037493 | 0.077806 | 0.04089  | MDK/UCN/    |
| BP | GO:001073 | protein kin  | 5/905  | 39/18866  | 0.037493 | 0.077806 | 0.04089  | ADIPOQ/M    |
| BP | GO:003314 | regulation   | 5/905  | 39/18866  | 0.037493 | 0.077806 | 0.04089  | SRC/AR/PA   |
| BP | GO:003420 | amyloid-be   | 5/905  | 39/18866  | 0.037493 | 0.077806 | 0.04089  | IFNG/TNF/   |
| BP | GO:007252 | pyrimidine   | 5/905  | 39/18866  | 0.037493 | 0.077806 | 0.04089  | APOBEC3G    |
| BP | GO:200027 | negative re  | 5/905  | 39/18866  | 0.037493 | 0.077806 | 0.04089  | ADIPOQ/SF   |
| BP | GO:000758 | respiratory  | 7/905  | 66/18866  | 0.038238 | 0.07912  | 0.04158  | SFTPA2/CY   |
| BP | GO:007217 | mesonephr    | 7/905  | 66/18866  | 0.038238 | 0.07912  | 0.04158  | VEGFA/AG    |
| BP | GO:015011 | regulation   | 7/905  | 66/18866  | 0.038238 | 0.07912  | 0.04158  | APOD/VEG    |
| BP | GO:000965 | response tr  | 4/905  | 27/18866  | 0.038343 | 0.07912  | 0.04158  | HSP90AB1,   |
| BP | GO:001095 | response tr  | 4/905  | 27/18866  | 0.038343 | 0.07912  | 0.04158  | CXCL10/MI   |
| BP | GO:003308 | regulation   | 4/905  | 27/18866  | 0.038343 | 0.07912  | 0.04158  | IL1B/IL7R/I |
| BP | GO:004250 | serine pho:  | 4/905  | 27/18866  | 0.038343 | 0.07912  | 0.04158  | IFNG/IFNE/  |
| BP | GO:004642 | negative re  | 4/905  | 27/18866  | 0.038343 | 0.07912  | 0.04158  | SOCS3/SOC   |
| BP | GO:004875 | animal org:  | 4/905  | 27/18866  | 0.038343 | 0.07912  | 0.04158  | LTF/BMP2/   |
| BP | GO:009014 | regulation   | 4/905  | 27/18866  | 0.038343 | 0.07912  | 0.04158  | MAPT/PPA    |
| BP | GO:190247 | regulation   | 4/905  | 27/18866  | 0.038343 | 0.07912  | 0.04158  | MAPT/WN     |
| BP | GO:190331 | positive re  | 4/905  | 27/18866  | 0.038343 | 0.07912  | 0.04158  | TFR2/SRC/I  |
| BP | GO:007200 | nephron e    | 10/905 | 110/18866 | 0.038515 | 0.07912  | 0.04158  | ADIPOQ/ST   |
| BP | GO:009715 | execution    | 9/905  | 95/18866  | 0.038521 | 0.07912  | 0.04158  | ACVR1C/GI   |
| BP | GO:000225 | T-helper ce  | 3/905  | 16/18866  | 0.038609 | 0.07912  | 0.04158  | IL23A/IL12  |
| BP | GO:000322 | ventricular  | 3/905  | 16/18866  | 0.038609 | 0.07912  | 0.04158  | DLL4/NRG1   |
| BP | GO:001091 | regulation   | 3/905  | 16/18866  | 0.038609 | 0.07912  | 0.04158  | PTK2B/ADC   |
| BP | GO:001701 | protein nit  | 3/905  | 16/18866  | 0.038609 | 0.07912  | 0.04158  | S100A9/S1   |
| BP | GO:001811 | peptidyl-cy  | 3/905  | 16/18866  | 0.038609 | 0.07912  | 0.04158  | S100A9/S1   |
| BP | GO:002154 | dentate gy   | 3/905  | 16/18866  | 0.038609 | 0.07912  | 0.04158  | MDK/NR2E    |
| BP | GO:003222 | regulation   | 3/905  | 16/18866  | 0.038609 | 0.07912  | 0.04158  | PTGS2/GDI   |
| BP | GO:003235 | response tr  | 3/905  | 16/18866  | 0.038609 | 0.07912  | 0.04158  | INHBA/TGF   |
| BP | GO:003586 | response tr  | 3/905  | 16/18866  | 0.038609 | 0.07912  | 0.04158  | GNRH1/PP    |
| BP | GO:005096 | detection c  | 3/905  | 16/18866  | 0.038609 | 0.07912  | 0.04158  | CXCL12/CX   |
| BP | GO:005123 | sequesterir  | 3/905  | 16/18866  | 0.038609 | 0.07912  | 0.04158  | LCN2/S100   |
| BP | GO:006057 | intestinal e | 3/905  | 16/18866  | 0.038609 | 0.07912  | 0.04158  | SRC/IL6ST/  |
| BP | GO:006154 | ganglion d   | 3/905  | 16/18866  | 0.038609 | 0.07912  | 0.04158  | SEMA3A/N    |
| BP | GO:007088 | positive re  | 3/905  | 16/18866  | 0.038609 | 0.07912  | 0.04158  | TNF/IGF1/I  |
| BP | GO:007228 | metaneph     | 3/905  | 16/18866  | 0.038609 | 0.07912  | 0.04158  | STAT1/GDI   |
| BP | GO:008610 | G protein-c  | 3/905  | 16/18866  | 0.038609 | 0.07912  | 0.04158  | SRC/NOS1/   |
| BP | GO:010605 | positive re  | 3/905  | 16/18866  | 0.038609 | 0.07912  | 0.04158  | TNF/IGF1/I  |
| BP | GO:190012 | negative re  | 3/905  | 16/18866  | 0.038609 | 0.07912  | 0.04158  | B2M/ADIPI   |
| BP | GO:190372 | regulation   | 3/905  | 16/18866  | 0.038609 | 0.07912  | 0.04158  | S100A9/AF   |
| BP | GO:000985 | negative re  | 23/905 | 323/18866 | 0.038691 | 0.079258 | 0.041653 | HSP90AB1,   |
| BP | GO:009917 | postsynaps   | 14/905 | 173/18866 | 0.039128 | 0.080124 | 0.042108 | WNT5A/NL    |
| BP | GO:004255 | response tr  | 16/905 | 206/18866 | 0.039838 | 0.081516 | 0.042839 | HSPA5/EIF;  |
| BP | GO:190280 | regulation   | 16/905 | 206/18866 | 0.039838 | 0.081516 | 0.042839 | PSME2/PM    |
| BP | GO:004394 | regulation   | 6/905  | 53/18866  | 0.040506 | 0.082819 | 0.043525 | GNAI1/NO:   |
| BP | GO:009917 | presynaps    | 6/905  | 53/18866  | 0.040506 | 0.082819 | 0.043525 | WNT5A/C5    |
| BP | GO:190367 | positive re  | 7/905  | 67/18866  | 0.041007 | 0.083811 | 0.044046 | S100A1/VE   |
| BP | GO:000220 | behavioral   | 5/905  | 40/18866  | 0.041222 | 0.08406  | 0.044177 | MDK/UCN/    |
| BP | GO:004390 | positive re  | 5/905  | 40/18866  | 0.041222 | 0.08406  | 0.044177 | VEGFA/EDI   |
| BP | GO:004574 | positive re  | 5/905  | 40/18866  | 0.041222 | 0.08406  | 0.044177 | CACYBP/EC   |

|    |                         |         |           |          |          |          |            |
|----|-------------------------|---------|-----------|----------|----------|----------|------------|
| BP | GO:004574 negative re   | 5/905   | 40/18866  | 0.041222 | 0.08406  | 0.044177 | DLL4/ARRE  |
| BP | GO:190274 apoptotic r   | 5/905   | 40/18866  | 0.041222 | 0.08406  | 0.044177 | VDR/ROBO   |
| BP | GO:190295 regulation    | 5/905   | 40/18866  | 0.041222 | 0.08406  | 0.044177 | IFNG/TNF/  |
| BP | GO:003240 regulation    | 21/905  | 291/18866 | 0.041396 | 0.084384 | 0.044347 | HSPA2/IFN  |
| BP | GO:004358 ear develop   | 17/905  | 224/18866 | 0.042005 | 0.085593 | 0.044982 | CXCL14/M   |
| BP | GO:190161 organic hydr  | 19/905  | 258/18866 | 0.042673 | 0.086921 | 0.04568  | IFNG/NFYA  |
| BP | GO:002184 cell prolifer | 4/905   | 28/18866  | 0.043094 | 0.087514 | 0.045992 | FABP7/WN   |
| BP | GO:003295 inositol pho  | 4/905   | 28/18866  | 0.043094 | 0.087514 | 0.045992 | PTK2B/PLC  |
| BP | GO:003355 mammary       | 4/905   | 28/18866  | 0.043094 | 0.087514 | 0.045992 | WNT5A/TN   |
| BP | GO:003588 enteroend     | 4/905   | 28/18866  | 0.043094 | 0.087514 | 0.045992 | WNT5A/GS   |
| BP | GO:004433 cell-cell ad  | 4/905   | 28/18866  | 0.043094 | 0.087514 | 0.045992 | VEGFA/WN   |
| BP | GO:004574 positive re   | 4/905   | 28/18866  | 0.043094 | 0.087514 | 0.045992 | NOS1/GRP   |
| BP | GO:007145 cellular res  | 4/905   | 28/18866  | 0.043094 | 0.087514 | 0.045992 | TNF/MPO/   |
| BP | GO:007145 cellular res  | 4/905   | 28/18866  | 0.043094 | 0.087514 | 0.045992 | TNF/MPO/   |
| BP | GO:190301 regulation    | 6/905   | 54/18866  | 0.043797 | 0.08891  | 0.046725 | IL15/PTX3/ |
| BP | GO:004001 regulation    | 7/905   | 68/18866  | 0.043902 | 0.089089 | 0.046819 | PIK3CA/GD  |
| BP | GO:002285 regulation    | 20/905  | 276/18866 | 0.044104 | 0.089465 | 0.047017 | HSPA2/IFN  |
| BP | GO:190351 mucopolys     | 10/905  | 113/18866 | 0.044967 | 0.091182 | 0.04792  | TGFB1/IL1  |
| BP | GO:000318 pulmonary     | 3/905   | 17/18866  | 0.045257 | 0.09129  | 0.047976 | ROBO2/JA   |
| BP | GO:000925 mRNA tran     | 3/905   | 17/18866  | 0.045257 | 0.09129  | 0.047976 | C5AR1/PP   |
| BP | GO:001071 regulation    | 3/905   | 17/18866  | 0.045257 | 0.09129  | 0.047976 | TGFB1/FGF  |
| BP | GO:002178 preganglio    | 3/905   | 17/18866  | 0.045257 | 0.09129  | 0.047976 | SEMA3A/P   |
| BP | GO:003073 sequester     | 3/905   | 17/18866  | 0.045257 | 0.09129  | 0.047976 | IL1B/TNF/F |
| BP | GO:003363 cell-cell ad  | 3/905   | 17/18866  | 0.045257 | 0.09129  | 0.047976 | CXCL13/CC  |
| BP | GO:004572 positive re   | 3/905   | 17/18866  | 0.045257 | 0.09129  | 0.047976 | PPARGC1A   |
| BP | GO:005158 regulation    | 3/905   | 17/18866  | 0.045257 | 0.09129  | 0.047976 | NOS1/GDN   |
| BP | GO:006064 mammary       | 3/905   | 17/18866  | 0.045257 | 0.09129  | 0.047976 | HIF1A/CEB  |
| BP | GO:006115 3'-UTR-me     | 3/905   | 17/18866  | 0.045257 | 0.09129  | 0.047976 | MOV10/D    |
| BP | GO:007025 renal absor   | 3/905   | 17/18866  | 0.045257 | 0.09129  | 0.047976 | ADIPOQ/CI  |
| BP | GO:009018 negative re   | 3/905   | 17/18866  | 0.045257 | 0.09129  | 0.047976 | MMP9/ADI   |
| BP | GO:190533 negative re   | 3/905   | 17/18866  | 0.045257 | 0.09129  | 0.047976 | TNF/STAT1  |
| BP | GO:200126 regulation    | 3/905   | 17/18866  | 0.045257 | 0.09129  | 0.047976 | MMP9/PL    |
| BP | GO:006113 regulation    | 15/905  | 193/18866 | 0.045298 | 0.091332 | 0.047998 | HSP90AB1,  |
| BP | GO:001485 striated m    | 8/905   | 83/18866  | 0.045345 | 0.091332 | 0.047998 | RBP4/ANG   |
| BP | GO:004804 focal adhe    | 8/905   | 83/18866  | 0.045345 | 0.091332 | 0.047998 | APOD/VEG   |
| BP | GO:200102 negative re   | 8/905   | 83/18866  | 0.045345 | 0.091332 | 0.047998 | PSMD10/C   |
| BP | GO:004472 DNA methy     | 9/905   | 98/18866  | 0.045552 | 0.091714 | 0.048199 | APOBEC3G   |
| BP | GO:000761 learning      | 12/905  | 145/18866 | 0.046385 | 0.093357 | 0.049062 | TLR2/PTGS  |
| BP | GO:000170 endoderm      | 6/905   | 55/18866  | 0.047251 | 0.094928 | 0.049888 | MMP9/ITG   |
| BP | GO:000322 ventricular   | 6/905   | 55/18866  | 0.047251 | 0.094928 | 0.049888 | TGFB1/DLL  |
| BP | GO:000834 glial cell mi | 6/905   | 55/18866  | 0.047251 | 0.094928 | 0.049888 | CCL2/CCL3  |
| BP | GO:002202 telencepha    | 6/905   | 55/18866  | 0.047251 | 0.094928 | 0.049888 | CXCL12/CX  |
| BP | GO:002203 metenceph     | 10/905  | 114/18866 | 0.047271 | 0.094928 | 0.049888 | HSPA5/SEN  |
| BP | GO:003241 positive re   | 10/905  | 114/18866 | 0.047271 | 0.094928 | 0.049888 | HSPA2/IFN  |
| CC | GO:000985 external sic  | 131/907 | 417/19559 | 2.88E-73 | 1.40E-70 | 1.13E-70 | AZGP1/B2   |
| CC | GO:001981 immunogl      | 53/907  | 163/19559 | 1.09E-30 | 2.65E-28 | 2.14E-28 | CD79A/IG   |
| CC | GO:009880 plasma me     | 66/907  | 307/19559 | 3.46E-26 | 5.62E-24 | 4.53E-24 | B2M/CD4/   |
| CC | GO:004257 immunogl      | 34/907  | 76/19559  | 1.74E-25 | 2.12E-23 | 1.71E-23 | IGHE/IGHG  |
| CC | GO:004512 membrane      | 52/907  | 329/19559 | 7.15E-15 | 6.59E-13 | 5.31E-13 | CD4/ICAM:  |
| CC | GO:009885 membrane      | 52/907  | 330/19559 | 8.12E-15 | 6.59E-13 | 5.31E-13 | CD4/ICAM:  |

|    |           |                       |        |           |          |          |          |              |
|----|-----------|-----------------------|--------|-----------|----------|----------|----------|--------------|
| CC | GO:009858 | membrane              | 52/907 | 343/19559 | 4.03E-14 | 2.81E-12 | 2.26E-12 | CD4/ICAM1    |
| CC | GO:004258 | specific granule      | 33/907 | 160/19559 | 3.53E-13 | 2.12E-11 | 1.71E-11 | B2M/SLPI/    |
| CC | GO:003198 | vesicle lumen         | 49/907 | 328/19559 | 3.92E-13 | 2.12E-11 | 1.71E-11 | B2M/HSP90    |
| CC | GO:006020 | cytoplasmic           | 48/907 | 326/19559 | 1.18E-12 | 5.74E-11 | 4.63E-11 | B2M/HSP90    |
| CC | GO:003066 | secretory granule     | 46/907 | 306/19559 | 1.66E-12 | 7.35E-11 | 5.93E-11 | FCER1G/HLA-D |
| CC | GO:003477 | secretory granule     | 47/907 | 322/19559 | 2.79E-12 | 1.13E-10 | 9.14E-11 | B2M/HSP90    |
| CC | GO:004210 | T cell receptor       | 29/907 | 140/19559 | 8.50E-12 | 3.18E-10 | 2.57E-10 | CD4/PTPN22   |
| CC | GO:007082 | tertiary granule      | 31/907 | 164/19559 | 2.01E-11 | 6.98E-10 | 5.63E-10 | B2M/FCER1G   |
| CC | GO:007256 | blood microvillus     | 29/907 | 148/19559 | 3.58E-11 | 1.16E-09 | 9.37E-10 | HSPA2/TGFB   |
| CC | GO:003013 | endocytic vesicle     | 44/907 | 313/19559 | 4.98E-11 | 1.52E-09 | 1.22E-09 | B2M/CALR     |
| CC | GO:006202 | collagen-coated       | 53/907 | 427/19559 | 6.49E-11 | 1.86E-09 | 1.50E-09 | AZGP1/CALR   |
| CC | GO:002262 | proteasome            | 12/907 | 24/19559  | 1.49E-10 | 4.02E-09 | 3.24E-09 | PSMC2/PSI    |
| CC | GO:004533 | phagocytic vesicle    | 27/907 | 140/19559 | 2.47E-10 | 6.33E-09 | 5.11E-09 | B2M/CALR     |
| CC | GO:000583 | proteasome            | 11/907 | 21/19559  | 4.62E-10 | 1.13E-08 | 9.07E-09 | PSMC2/PSI    |
| CC | GO:007082 | tertiary granule      | 19/907 | 73/19559  | 5.61E-10 | 1.30E-08 | 1.05E-08 | FCER1G/PLA2  |
| CC | GO:004261 | MHC proteasome        | 11/907 | 25/19559  | 4.92E-09 | 1.09E-07 | 8.79E-08 | B2M/HLA-D    |
| CC | GO:003067 | phagocytic vesicle    | 18/907 | 77/19559  | 1.02E-08 | 2.17E-07 | 1.75E-07 | B2M/CALR     |
| CC | GO:000576 | early endosome        | 44/907 | 377/19559 | 1.82E-08 | 3.70E-07 | 2.98E-07 | B2M/CD1E     |
| CC | GO:003066 | endocytic vesicle     | 26/907 | 164/19559 | 3.87E-08 | 7.53E-07 | 6.07E-07 | B2M/CALR     |
| CC | GO:003558 | specific granule      | 15/907 | 62/19559  | 1.06E-07 | 1.98E-06 | 1.60E-06 | B2M/SLPI/    |
| CC | GO:000177 | immunology            | 12/907 | 39/19559  | 1.13E-07 | 2.03E-06 | 1.64E-06 | ICAM1/VA     |
| CC | GO:003557 | specific granule      | 18/907 | 91/19559  | 1.60E-07 | 2.79E-06 | 2.25E-06 | PLAU/CYBE    |
| CC | GO:000050 | proteasome            | 14/907 | 63/19559  | 8.61E-07 | 1.45E-05 | 1.17E-05 | PSMB8/PSI    |
| CC | GO:007168 | endocytic vesicle     | 8/907  | 20/19559  | 1.59E-06 | 2.58E-05 | 2.08E-05 | CALR/HSP90   |
| CC | GO:000592 | focal adhesion        | 42/907 | 415/19559 | 1.86E-06 | 2.92E-05 | 2.36E-05 | B2M/CALR     |
| CC | GO:000578 | endoplasmic reticulum | 34/907 | 308/19559 | 2.68E-06 | 4.06E-05 | 3.27E-05 | B2M/CALR     |
| CC | GO:190536 | endopeptidase         | 14/907 | 69/19559  | 2.75E-06 | 4.06E-05 | 3.27E-05 | PSMB8/PSI    |
| CC | GO:003005 | cell-substrate        | 42/907 | 423/19559 | 3.03E-06 | 4.34E-05 | 3.50E-05 | B2M/CALR     |
| CC | GO:000211 | semaphorin            | 6/907  | 11/19559  | 3.70E-06 | 5.15E-05 | 4.15E-05 | PLXNA1/PL    |
| CC | GO:000594 | phosphatidyl          | 9/907  | 29/19559  | 4.12E-06 | 5.28E-05 | 4.26E-05 | SOCS3/SOC    |
| CC | GO:007155 | integral component    | 9/907  | 29/19559  | 4.12E-06 | 5.28E-05 | 4.26E-05 | CALR/HLA-D   |
| CC | GO:009855 | luminal surface       | 9/907  | 29/19559  | 4.12E-06 | 5.28E-05 | 4.26E-05 | CALR/HLA-D   |
| CC | GO:006170 | inflammation          | 7/907  | 17/19559  | 5.82E-06 | 7.27E-05 | 5.86E-05 | CASP1/DH     |
| CC | GO:000854 | proteasome            | 6/907  | 12/19559  | 7.11E-06 | 8.65E-05 | 6.97E-05 | PSMC2/PSI    |
| CC | GO:003066 | coated vesicle        | 23/907 | 183/19559 | 1.37E-05 | 0.000163 | 0.000131 | B2M/CD4/     |
| CC | GO:000577 | vacuolar lumen        | 22/907 | 173/19559 | 1.74E-05 | 0.000201 | 0.000162 | CD1E/CTSB    |
| CC | GO:003013 | coated vesicle        | 31/907 | 298/19559 | 2.39E-05 | 0.00027  | 0.000218 | B2M/CD4/     |
| CC | GO:009857 | luminal surface       | 9/907  | 36/19559  | 2.89E-05 | 0.00032  | 0.000258 | CALR/HLA-D   |
| CC | GO:003109 | platelet alpha        | 12/907 | 67/19559  | 5.23E-05 | 0.000566 | 0.000456 | TMSB4X/TG    |
| CC | GO:004485 | plasma membrane       | 16/907 | 113/19559 | 6.52E-05 | 0.000691 | 0.000557 | F2R/MAPK     |
| CC | GO:005503 | recycling endosome    | 22/907 | 190/19559 | 7.39E-05 | 0.000765 | 0.000617 | B2M/PDIA     |
| CC | GO:003563 | CD40 receptor         | 5/907  | 11/19559  | 7.75E-05 | 0.000784 | 0.000632 | CD40/TRAF    |
| CC | GO:000579 | Golgi lumen           | 15/907 | 103/19559 | 7.89E-05 | 0.000784 | 0.000632 | DEFB1/TGF    |
| CC | GO:190536 | peptidase             | 14/907 | 92/19559  | 8.33E-05 | 0.000811 | 0.000654 | PSMB8/PSI    |
| CC | GO:000590 | caveola               | 13/907 | 82/19559  | 9.64E-05 | 0.00092  | 0.000742 | F2R/MAPK     |
| CC | GO:010100 | ficolin-1 receptor    | 11/907 | 61/19559  | 9.99E-05 | 0.000936 | 0.000754 | FCER1G/SL    |
| CC | GO:000579 | Golgi-associated      | 21/907 | 181/19559 | 0.000104 | 0.000953 | 0.000768 | B2M/HLA-D    |
| CC | GO:003066 | clathrin-coated       | 16/907 | 118/19559 | 0.00011  | 0.000996 | 0.000803 | CD4/HLA-D    |
| CC | GO:004302 | NADPH oxidase         | 5/907  | 12/19559  | 0.000128 | 0.001132 | 0.000913 | NOX4/DUC     |
| CC | GO:003190 | early endosome        | 19/907 | 161/19559 | 0.000174 | 0.001515 | 0.001222 | B2M/HLA-D    |

|    |                         |         |           |           |           |           |                   |
|----|-------------------------|---------|-----------|-----------|-----------|-----------|-------------------|
| CC | GO:190472 tertiary gra  | 10/907  | 55/19559  | 0.000191  | 0.001635  | 0.001318  | B2M/PGLY          |
| CC | GO:009863 protein cor   | 8/907   | 36/19559  | 0.000197  | 0.001654  | 0.001333  | ITGAV/ITGI        |
| CC | GO:001989 extrinsic cc  | 29/907  | 306/19559 | 0.000223  | 0.001842  | 0.001485  | DEFB1/S10         |
| CC | GO:003013 clathrin-co   | 21/907  | 194/19559 | 0.000275  | 0.002229  | 0.001797  | CD4/HLA-D         |
| CC | GO:003109 platelet alp  | 13/907  | 91/19559  | 0.000282  | 0.002253  | 0.001816  | TMSB4X/TI         |
| CC | GO:004262 mast cell gi  | 6/907   | 22/19559  | 0.000385  | 0.002975  | 0.002399  | BTK/PIK3CI        |
| CC | GO:009703 perinuclear   | 6/907   | 22/19559  | 0.000385  | 0.002975  | 0.002399  | NOX4/CYBI         |
| CC | GO:004320 lysosomal l   | 13/907  | 96/19559  | 0.00048   | 0.003654  | 0.002946  | CD1E/CTSB         |
| CC | GO:001250 ER to Golgi   | 10/907  | 62/19559  | 0.000525  | 0.003934  | 0.003171  | B2M/HLA- <i>A</i> |
| CC | GO:005503 recycling e   | 12/907  | 85/19559  | 0.000534  | 0.003942  | 0.003178  | B2M/PDIA3         |
| CC | GO:003066 Golgi-assoc   | 14/907  | 112/19559 | 0.000675  | 0.004905  | 0.003954  | B2M/HLA- <i>A</i> |
| CC | GO:003190 endosome      | 7/907   | 35/19559  | 0.000969  | 0.006943  | 0.005598  | B2M/CTSB,         |
| CC | GO:003125 cell leading  | 34/907  | 421/19559 | 0.001257  | 0.008873  | 0.007154  | S100B/S10         |
| CC | GO:003601 endolysosc    | 5/907   | 20/19559  | 0.001836  | 0.012774  | 0.010299  | CTSB/CTSL,        |
| CC | GO:000830 integrin co   | 6/907   | 31/19559  | 0.00266   | 0.018244  | 0.014709  | ITGAV/ITGI        |
| CC | GO:000172 ruffle        | 17/907  | 179/19559 | 0.004088  | 0.027652  | 0.022294  | S100B/S10         |
| CC | GO:010100 ficolin-1-ric | 13/907  | 124/19559 | 0.004992  | 0.03285   | 0.026484  | CTSB/HSP9         |
| CC | GO:190481 ficolin-1-ric | 13/907  | 124/19559 | 0.004992  | 0.03285   | 0.026484  | CTSB/HSP9         |
| CC | GO:007143 invadopodi    | 4/907   | 16/19559  | 0.005345  | 0.034344  | 0.027689  | PLAUR/PAI         |
| CC | GO:003013 transport v   | 31/907  | 410/19559 | 0.00536   | 0.034344  | 0.027689  | B2M/HLA- <i>A</i> |
| CC | GO:001632 apical plasr  | 28/907  | 361/19559 | 0.005626  | 0.03558   | 0.028685  | CTSB/CTSL,        |
| CC | GO:000566 transcriptic  | 31/907  | 413/19559 | 0.005943  | 0.037107  | 0.029917  | NFYA/RELB         |
| CC | GO:009856 cytoplasmic   | 17/907  | 188/19559 | 0.00666   | 0.041054  | 0.033099  | S100A6/GM         |
| CC | GO:000577 multivesicl   | 8/907   | 62/19559  | 0.007628  | 0.045949  | 0.037045  | CTSL/SFTP/        |
| CC | GO:001660 PML body      | 11/907  | 102/19559 | 0.007642  | 0.045949  | 0.037045  | PML/ISG20         |
| CC | GO:009057 RNA polym     | 15/907  | 161/19559 | 0.008007  | 0.047553  | 0.038338  | NFYA/PPAF         |
| CC | GO:190255 serine/thre   | 10/907  | 89/19559  | 0.008104  | 0.047553  | 0.038338  | IKBKG/ACV         |
| CC | GO:003152 filopodium    | 4/907   | 18/19559  | 0.008348  | 0.0484    | 0.039021  | HLA-G/ITG,        |
| CC | GO:190291 protein kin   | 11/907  | 104/19559 | 0.008807  | 0.050456  | 0.040679  | IKBKG/ACV         |
| CC | GO:000564 nuclear en    | 3/907   | 10/19559  | 0.009335  | 0.052739  | 0.042519  | CACYBP/IG         |
| CC | GO:000989 cytoplasmic   | 15/907  | 164/19559 | 0.009422  | 0.052739  | 0.042519  | S100A6/GM         |
| CC | GO:000577 late endosc   | 22/907  | 278/19559 | 0.010533  | 0.058291  | 0.046996  | CD1E/CTSL         |
| MF | GO:004801 receptor lig  | 177/879 | 487/18352 | 2.42E-110 | 1.85E-107 | 1.37E-107 | IFNG/LTA/(        |
| MF | GO:003054 signaling re  | 177/879 | 492/18352 | 1.87E-109 | 7.13E-107 | 5.29E-107 | IFNG/LTA/(        |
| MF | GO:000512 cytokine re   | 110/879 | 271/18352 | 1.15E-73  | 2.94E-71  | 2.18E-71  | IFNG/LTA/I        |
| MF | GO:000512 cytokine ac   | 103/879 | 235/18352 | 5.02E-73  | 9.59E-71  | 7.11E-71  | IFNG/LTA/(        |
| MF | GO:000808 growth fac    | 68/879  | 162/18352 | 9.77E-47  | 1.49E-44  | 1.11E-44  | CXCL12/TG         |
| MF | GO:000382 antigen bin   | 69/879  | 168/18352 | 1.21E-46  | 1.54E-44  | 1.14E-44  | CD1C/CD1I         |
| MF | GO:001995 cytokine bi   | 55/879  | 135/18352 | 3.98E-37  | 3.80E-35  | 2.82E-35  | CD4/CCR1C         |
| MF | GO:014037 immune re     | 55/879  | 135/18352 | 3.98E-37  | 3.80E-35  | 2.82E-35  | CD4/FCER1         |
| MF | GO:000489 cytokine re   | 47/879  | 97/18352  | 3.58E-36  | 3.04E-34  | 2.25E-34  | CD4/CCR1C         |
| MF | GO:007085 growth fac    | 48/879  | 141/18352 | 2.48E-28  | 1.90E-26  | 1.41E-26  | ERAP1/IL1E        |
| MF | GO:000800 chemokine     | 28/879  | 49/18352  | 1.10E-24  | 7.65E-23  | 5.67E-23  | CXCL14/CX         |
| MF | GO:003498 immunogl      | 34/879  | 80/18352  | 3.90E-24  | 2.48E-22  | 1.84E-22  | IGHE/IGHG         |
| MF | GO:004237 chemokine     | 32/879  | 70/18352  | 5.20E-24  | 3.06E-22  | 2.27E-22  | CXCL14/CX         |
| MF | GO:003281 tumor necr    | 26/879  | 48/18352  | 3.41E-22  | 1.86E-20  | 1.38E-20  | LTA/TNF/S         |
| MF | GO:000516 tumor necr    | 21/879  | 31/18352  | 4.32E-21  | 2.20E-19  | 1.63E-19  | LTA/TNF/S         |
| MF | GO:000166 G protein-c   | 58/879  | 293/18352 | 1.30E-20  | 6.21E-19  | 4.61E-19  | CXCL14/CX         |
| MF | GO:001983 growth fac    | 35/879  | 136/18352 | 1.23E-16  | 5.53E-15  | 4.10E-15  | CXCL13/ITC        |
| MF | GO:000852 G protein-c   | 36/879  | 148/18352 | 3.17E-16  | 1.35E-14  | 9.98E-15  | CCR10/F2R         |



|    |                        |        |           |          |          |          |            |
|----|------------------------|--------|-----------|----------|----------|----------|------------|
| MF | GO:000165 peptide rec  | 36/879 | 152/18352 | 7.89E-16 | 3.17E-14 | 2.35E-14 | CCR10/F2R  |
| MF | GO:004802 CCR chemc    | 20/879 | 47/18352  | 9.35E-15 | 3.57E-13 | 2.65E-13 | CXCL13/XC  |
| MF | GO:000517 hormone a    | 31/879 | 122/18352 | 1.01E-14 | 3.67E-13 | 2.72E-13 | ADIPOQ/C   |
| MF | GO:001995 C-C chemo    | 15/879 | 24/18352  | 1.24E-14 | 4.32E-13 | 3.20E-13 | CCR10/CXC  |
| MF | GO:001995 chemokine    | 17/879 | 33/18352  | 1.79E-14 | 5.94E-13 | 4.40E-13 | CCR10/ITG  |
| MF | GO:000165 G protein-c  | 15/879 | 26/18352  | 6.72E-14 | 2.05E-12 | 1.52E-12 | CCR10/CXC  |
| MF | GO:000495 chemokine    | 15/879 | 26/18352  | 6.72E-14 | 2.05E-12 | 1.52E-12 | CCR10/CXC  |
| MF | GO:000487 nuclear rec  | 20/879 | 52/18352  | 9.61E-14 | 2.72E-12 | 2.01E-12 | PPARG/VD   |
| MF | GO:009853 ligand-acti  | 20/879 | 52/18352  | 9.61E-14 | 2.72E-12 | 2.01E-12 | PPARG/VD   |
| MF | GO:001645 C-C chemo    | 14/879 | 23/18352  | 1.65E-13 | 4.50E-12 | 3.34E-12 | CCR10/CXC  |
| MF | GO:000471 protein tyr  | 30/879 | 135/18352 | 1.21E-12 | 3.18E-11 | 2.36E-11 | EIF2AK2/T  |
| MF | GO:004205 chemoattr    | 16/879 | 37/18352  | 3.35E-12 | 8.53E-11 | 6.33E-11 | CXCL10/VE  |
| MF | GO:004227 peptide bir  | 46/879 | 308/18352 | 6.17E-12 | 1.52E-10 | 1.13E-10 | CALR/CD1C  |
| MF | GO:001915 transmem     | 20/879 | 80/18352  | 7.54E-10 | 1.80E-08 | 1.33E-08 | HJV/PDGFF  |
| MF | GO:199078 protein tyr  | 22/879 | 98/18352  | 9.95E-10 | 2.30E-08 | 1.71E-08 | CD4/HSP9C  |
| MF | GO:000372 double-str   | 19/879 | 76/18352  | 2.00E-09 | 4.45E-08 | 3.30E-08 | HSP90AB1,  |
| MF | GO:004438 ubiquitin-li | 42/879 | 316/18352 | 2.04E-09 | 4.45E-08 | 3.30E-08 | CALR/HSPA  |
| MF | GO:003321 amide bind   | 47/879 | 381/18352 | 2.67E-09 | 5.67E-08 | 4.20E-08 | CALR/CD1C  |
| MF | GO:000517 integrin bir | 26/879 | 144/18352 | 4.51E-09 | 9.15E-08 | 6.78E-08 | CALR/ICAM  |
| MF | GO:000178 phosphoty    | 14/879 | 42/18352  | 4.55E-09 | 9.15E-08 | 6.78E-08 | SOCS3/MA   |
| MF | GO:000514 interleukin  | 9/879  | 16/18352  | 1.08E-08 | 2.07E-07 | 1.53E-07 | ERAP1/IL1E |
| MF | GO:003162 ubiquitin p  | 39/879 | 297/18352 | 1.08E-08 | 2.07E-07 | 1.53E-07 | CALR/HSPA  |
| MF | GO:004530 protein ph   | 15/879 | 53/18352  | 1.61E-08 | 3.00E-07 | 2.23E-07 | SOCS3/MA   |
| MF | GO:000471 non-memb     | 14/879 | 46/18352  | 1.73E-08 | 3.14E-07 | 2.33E-07 | EIF2AK2/T  |
| MF | GO:004545 chemorep     | 11/879 | 28/18352  | 2.90E-08 | 5.15E-07 | 3.82E-07 | SEMA3A/SI  |
| MF | GO:003021 semaphori    | 10/879 | 23/18352  | 3.91E-08 | 6.64E-07 | 4.92E-07 | SEMA3A/SI  |
| MF | GO:003818 pattern rec  | 10/879 | 23/18352  | 3.91E-08 | 6.64E-07 | 4.92E-07 | PGLYRP1/P  |
| MF | GO:004523 CXCR cherr   | 9/879  | 18/18352  | 4.19E-08 | 6.96E-07 | 5.16E-07 | CXCL8/CXC  |
| MF | GO:004260 peptide an   | 11/879 | 31/18352  | 1.00E-07 | 1.63E-06 | 1.21E-06 | HLA-A/HLA  |
| MF | GO:000370 steroid hor  | 10/879 | 26/18352  | 1.59E-07 | 2.53E-06 | 1.88E-06 | ESR2/ESRR  |
| MF | GO:001502 coreceptor   | 13/879 | 48/18352  | 2.59E-07 | 4.04E-06 | 2.99E-06 | CD4/HJV/I  |
| MF | GO:000515 epidermal    | 11/879 | 34/18352  | 2.97E-07 | 4.53E-06 | 3.36E-06 | PLSCR1/VA  |
| MF | GO:001715 semaphori    | 7/879  | 12/18352  | 3.62E-07 | 5.42E-06 | 4.02E-06 | PLXNA1/PL  |
| MF | GO:004256 hormone b    | 17/879 | 84/18352  | 3.90E-07 | 5.73E-06 | 4.25E-06 | CALR/PIK3I |
| MF | GO:005121 phosphopr    | 17/879 | 85/18352  | 4.66E-07 | 6.72E-06 | 4.98E-06 | SOCS3/MA   |
| MF | GO:001920 kinase regl  | 29/879 | 216/18352 | 5.15E-07 | 7.28E-06 | 5.40E-06 | HSP90AB1,  |
| MF | GO:003361 receptor s   | 10/879 | 29/18352  | 5.26E-07 | 7.31E-06 | 5.42E-06 | SRC/BMP2,  |
| MF | GO:007070 BMP recep    | 7/879  | 13/18352  | 7.52E-07 | 1.01E-05 | 7.51E-06 | SRC/BMP2,  |
| MF | GO:004354 phosphatic   | 10/879 | 30/18352  | 7.56E-07 | 1.01E-05 | 7.51E-06 | PDGFRB/PI  |
| MF | GO:000471 transmem     | 14/879 | 61/18352  | 8.29E-07 | 1.09E-05 | 8.09E-06 | PDGFRB/E   |
| MF | GO:007065 transmem     | 9/879  | 24/18352  | 8.69E-07 | 1.12E-05 | 8.34E-06 | SRC/BMP2,  |
| MF | GO:000161 virus recep  | 15/879 | 74/18352  | 1.83E-06 | 2.30E-05 | 1.70E-05 | CD4/ICAM:  |
| MF | GO:014027 exogenous    | 15/879 | 74/18352  | 1.83E-06 | 2.30E-05 | 1.70E-05 | CD4/ICAM:  |
| MF | GO:000153 lipopolysac  | 10/879 | 33/18352  | 2.04E-06 | 2.52E-05 | 1.87E-05 | TLR2/LBP/I |
| MF | GO:000503 tumor necr   | 6/879  | 10/18352  | 2.11E-06 | 2.56E-05 | 1.90E-05 | TNFRSF11A  |
| MF | GO:004693 1-phospha    | 7/879  | 16/18352  | 4.42E-06 | 5.27E-05 | 3.91E-05 | SOCS3/SO   |
| MF | GO:000553 glycosamin   | 28/879 | 232/18352 | 6.67E-06 | 7.80E-05 | 5.78E-05 | CXCL10/CX  |
| MF | GO:003097 receptor ty  | 14/879 | 72/18352  | 6.74E-06 | 7.80E-05 | 5.78E-05 | BLNK/PIK3I |
| MF | GO:003802 cargo rece   | 14/879 | 73/18352  | 7.97E-06 | 9.09E-05 | 6.74E-05 | TFRC/TFR2  |
| MF | GO:000503 death rece   | 6/879  | 12/18352  | 8.55E-06 | 9.34E-05 | 6.92E-05 | TNFRSF11A  |

|    |                                 |           |          |          |          |            |
|----|---------------------------------|-----------|----------|----------|----------|------------|
| MF | GO:000516 neurotrophin receptor | 12/18352  | 8.55E-06 | 9.34E-05 | 6.92E-05 | PIK3R1/NG  |
| MF | GO:003532 Toll-like receptor    | 12/18352  | 8.55E-06 | 9.34E-05 | 6.92E-05 | S100A9/S1  |
| MF | GO:001617 superoxide            | 13/18352  | 1.52E-05 | 0.000164 | 0.000122 | NOX4/DUC   |
| MF | GO:000512 death receptor        | 20/18352  | 2.53E-05 | 0.000264 | 0.000196 | FASLG/NGF  |
| MF | GO:003501 phosphatidylcholine   | 20/18352  | 2.53E-05 | 0.000264 | 0.000196 | SOCS3/SOC  |
| MF | GO:000517 vascular endothelium  | 14/18352  | 2.56E-05 | 0.000264 | 0.000196 | VEGFA/VEG  |
| MF | GO:001988 protein kinase        | 185/18352 | 2.70E-05 | 0.000275 | 0.000204 | HSP90AB1,  |
| MF | GO:000202 protease inhibitor    | 137/18352 | 2.92E-05 | 0.000293 | 0.000217 | ADRM1/LC   |
| MF | GO:000462 phospholipase         | 28/18352  | 3.54E-05 | 0.000351 | 0.00026  | PDIA3/CCL  |
| MF | GO:005142 hormone receptor      | 177/18352 | 4.02E-05 | 0.000391 | 0.00029  | CALR/OAS1  |
| MF | GO:000495 eicosanoid receptor   | 15/18352  | 4.09E-05 | 0.000391 | 0.00029  | PPARG/PTC  |
| MF | GO:000516 platelet-derived      | 15/18352  | 4.09E-05 | 0.000391 | 0.00029  | VEGFA/PD   |
| MF | GO:000549 steroid binding       | 106/18352 | 4.31E-05 | 0.000407 | 0.000302 | PDIA2/CET  |
| MF | GO:000122 transcription factor  | 29/18352  | 4.69E-05 | 0.000437 | 0.000324 | AR/NR4A3,  |
| MF | GO:004830 calcium-dependent     | 85/18352  | 4.81E-05 | 0.000442 | 0.000328 | S100A9/S1  |
| MF | GO:007172 lipopeptide           | 10/18352  | 5.13E-05 | 0.000467 | 0.000346 | CD1C/CD1I  |
| MF | GO:000820 heparin binding       | 169/18352 | 6.00E-05 | 0.000539 | 0.0004   | CXCL10/CX  |
| MF | GO:000518 neuropeptide          | 30/18352  | 6.12E-05 | 0.000539 | 0.0004   | CORT/GRP,  |
| MF | GO:000395 NAD+ nucleotide       | 16/18352  | 6.28E-05 | 0.000539 | 0.0004   | TLR2/IL18R |
| MF | GO:005013 NAD(P)+ nucleotide    | 16/18352  | 6.28E-05 | 0.000539 | 0.0004   | TLR2/IL18R |
| MF | GO:006180 NAD+ nucleotide       | 16/18352  | 6.28E-05 | 0.000539 | 0.0004   | TLR2/IL18R |
| MF | GO:000550 fatty acid binding    | 39/18352  | 7.37E-05 | 0.000625 | 0.000463 | S100A9/S1  |
| MF | GO:001986 IgG binding           | 11/18352  | 9.04E-05 | 0.000759 | 0.000563 | FCER1G/FC  |
| MF | GO:000516 transforming          | 24/18352  | 9.54E-05 | 0.000784 | 0.000581 | TGFB1/AM   |
| MF | GO:001986 immunoglobulin        | 24/18352  | 9.54E-05 | 0.000784 | 0.000581 | CD4/FCER1  |
| MF | GO:000551 collagen binding      | 70/18352  | 0.000111 | 0.000899 | 0.000666 | CTS/CTSL,  |
| MF | GO:002302 MHC protein           | 25/18352  | 0.000127 | 0.001022 | 0.000757 | HLA-DMB/I  |
| MF | GO:001704 peptide hormone       | 51/18352  | 0.000129 | 0.001025 | 0.00076  | PIK3R1/ED  |
| MF | GO:004283 peptidoglycan         | 18/18352  | 0.000134 | 0.001056 | 0.000783 | PGLYRP1/P  |
| MF | GO:008972 caspase binding       | 12/18352  | 0.000149 | 0.001161 | 0.00086  | RIPK2/NLR  |
| MF | GO:000443 phosphatidyl          | 26/18352  | 0.000167 | 0.001287 | 0.000954 | CCL5/CCR5  |
| MF | GO:000467 transmembrane         | 19/18352  | 0.000188 | 0.001423 | 0.001055 | HJV/LTBP1, |
| MF | GO:005066 oxidoreductase        | 19/18352  | 0.000188 | 0.001423 | 0.001055 | NOX4/DUC   |
| MF | GO:003970 co-receptor           | 13/18352  | 0.000232 | 0.001741 | 0.00129  | TFR2/BMP:  |
| MF | GO:000154 amyloid-beta          | 77/18352  | 0.000281 | 0.002065 | 0.001531 | TLR2/MSR:  |
| MF | GO:001990 protein phosphatase   | 149/18352 | 0.000281 | 0.002065 | 0.001531 | STAT1/MA   |
| MF | GO:005084 extracellular         | 57/18352  | 0.000336 | 0.002444 | 0.001812 | TINAGL1/V  |
| MF | GO:005142 peptide hormone       | 21/18352  | 0.000346 | 0.00248  | 0.001838 | GNRH1/PT   |
| MF | GO:004454 S100 protein          | 14/18352  | 0.000347 | 0.00248  | 0.001838 | S100B/S10  |
| MF | GO:003369 sialic acid           | 22/18352  | 0.000457 | 0.003235 | 0.002398 | ADIPOQ/CI  |
| MF | GO:006162 RNA polymerase        | 267/18352 | 0.000492 | 0.003445 | 0.002553 | CALR/OAS1  |
| MF | GO:000184 opsonin binding       | 15/18352  | 0.0005   | 0.003445 | 0.002553 | CALR/ITGA  |
| MF | GO:003604 long-chain            | 15/18352  | 0.0005   | 0.003445 | 0.002553 | S100A9/S1  |
| MF | GO:001650 peptidase inhibitor   | 40/18352  | 0.000526 | 0.003589 | 0.00266  | PSME2/PSI  |
| MF | GO:000515 insulin receptor      | 23/18352  | 0.000594 | 0.003948 | 0.002926 | SRC/PIK3R: |
| MF | GO:005043 transforming          | 23/18352  | 0.000594 | 0.003948 | 0.002926 | ITGAV/LTB  |
| MF | GO:003329 monocarboxylate       | 72/18352  | 0.000594 | 0.003948 | 0.002926 | S100A9/S1  |
| MF | GO:004216 SH2 domain            | 41/18352  | 0.000627 | 0.004126 | 0.003059 | SRC/PTK2/  |
| MF | GO:000122 transcription factor  | 51/18352  | 0.000632 | 0.004126 | 0.003059 | HDGF/AR/I  |
| MF | GO:006113 peptidase inhibitor   | 229/18352 | 0.000664 | 0.004298 | 0.003186 | PSME2/PSI  |

|    |                              |           |          |          |          |            |
|----|------------------------------|-----------|----------|----------|----------|------------|
| MF | GO:000515 insulin-like 5/879 | 16/18352  | 0.000699 | 0.004416 | 0.003273 | SOCS1/ARF  |
| MF | GO:000803 high-densit 5/879  | 16/18352  | 0.000699 | 0.004416 | 0.003273 | ABCA1/SCA  |
| MF | GO:005070 CARD dom 5/879     | 16/18352  | 0.000699 | 0.004416 | 0.003273 | CARD11/C   |
| MF | GO:004228 MHC prote 8/879    | 42/18352  | 0.000742 | 0.004646 | 0.003444 | CD4/KLRD1  |
| MF | GO:007185 neuropepti 7/879   | 33/18352  | 0.000808 | 0.005018 | 0.00372  | EDN3/APLN  |
| MF | GO:000495 prostaglan 4/879   | 10/18352  | 0.00087  | 0.005362 | 0.003975 | PPARG/PTC  |
| MF | GO:003418 apolipopro 5/879   | 17/18352  | 0.000952 | 0.005819 | 0.004313 | MAPT/ABC   |
| MF | GO:007181 lipoprotein 7/879  | 34/18352  | 0.000976 | 0.005871 | 0.004352 | MAPT/MSF   |
| MF | GO:007181 protein-lipi 7/879 | 34/18352  | 0.000976 | 0.005871 | 0.004352 | MAPT/MSF   |
| MF | GO:001990 phosphata: 20/879  | 194/18352 | 0.001052 | 0.006281 | 0.004656 | STAT1/MA   |
| MF | GO:000203 p53 bindin 10/879  | 66/18352  | 0.001113 | 0.006593 | 0.004887 | DAXX/HDA   |
| MF | GO:000495 prostanoid 4/879   | 11/18352  | 0.001316 | 0.007617 | 0.005646 | PPARG/PTC  |
| MF | GO:003195 thioesteras 4/879  | 11/18352  | 0.001316 | 0.007617 | 0.005646 | TRAF3/TRA  |
| MF | GO:005078 RAGE rece 4/879    | 11/18352  | 0.001316 | 0.007617 | 0.005646 | S100A9/S1  |
| MF | GO:000196 fibronectin 6/879  | 27/18352  | 0.001478 | 0.008491 | 0.006294 | CTSL/VEGF  |
| MF | GO:003029 protein tyr 5/879  | 19/18352  | 0.001652 | 0.009418 | 0.006981 | CCL5/EGF/  |
| MF | GO:003503 histone acc 6/879  | 28/18352  | 0.001806 | 0.010221 | 0.007576 | STAT1/NR4  |
| MF | GO:000412 cytidine de 4/879  | 12/18352  | 0.0019   | 0.010593 | 0.007852 | APOBEC3G   |
| MF | GO:000487 compleme 4/879     | 12/18352  | 0.0019   | 0.010593 | 0.007852 | C5AR1/CM   |
| MF | GO:003024 carbohydr 24/879   | 267/18352 | 0.002363 | 0.01308  | 0.009696 | CALR/KLRC  |
| MF | GO:004317 alcohol bin 11/879 | 86/18352  | 0.002623 | 0.014307 | 0.010605 | RBP1/RBP4  |
| MF | GO:000502 transformi 4/879   | 13/18352  | 0.00264  | 0.014307 | 0.010605 | LTBP1/BMI  |
| MF | GO:003612 BMP bindir 4/879   | 13/18352  | 0.00264  | 0.014307 | 0.010605 | HJV/GDF5/  |
| MF | GO:000184 compleme 5/879     | 21/18352  | 0.00267  | 0.014363 | 0.010646 | CALR/PTX3  |
| MF | GO:004288 amide tran 8/879   | 51/18352  | 0.002739 | 0.014634 | 0.010847 | AZGP1/TAF  |
| MF | GO:190468 peptide tra 6/879  | 31/18352  | 0.003123 | 0.016572 | 0.012284 | AZGP1/TAF  |
| MF | GO:001692 nuclear rec 12/879 | 101/18352 | 0.003203 | 0.016875 | 0.012509 | CALR/SRC/  |
| MF | GO:000467 protein ser 34/879 | 435/18352 | 0.003573 | 0.018695 | 0.013857 | HJV/EIF2A  |
| MF | GO:003525 nuclear ho 15/879  | 144/18352 | 0.003841 | 0.01994  | 0.01478  | CALR/OASL  |
| MF | GO:190168 sulfur com 23/879  | 262/18352 | 0.003863 | 0.01994  | 0.01478  | CXCL10/CX  |
| MF | GO:004302 cysteine-ty 7/879  | 43/18352  | 0.004023 | 0.02063  | 0.015292 | ARRB1/BIR  |
| MF | GO:004633 SMAD bind 10/879   | 79/18352  | 0.004353 | 0.022173 | 0.016436 | PML/FOS/E  |
| MF | GO:003525 glucocortic 4/879  | 15/18352  | 0.004669 | 0.02347  | 0.017397 | NR4A1/NR   |
| MF | GO:009715 cysteine-ty 4/879  | 15/18352  | 0.004669 | 0.02347  | 0.017397 | CASP1/PYC  |
| MF | GO:001679 hydrolase 6/879    | 34/18352  | 0.005051 | 0.025089 | 0.018597 | TLR2/IL18R |
| MF | GO:014029 DNA-bindir 28/879  | 347/18352 | 0.00506  | 0.025089 | 0.018597 | CALR/OASL  |
| MF | GO:006113 endopeptic 18/879  | 192/18352 | 0.00509  | 0.025089 | 0.018597 | PSME2/PSI  |
| MF | GO:003525 steroid hor 10/879 | 81/18352  | 0.005211 | 0.025523 | 0.018919 | CALR/SRC/  |
| MF | GO:003029 protein kin 10/879 | 82/18352  | 0.005687 | 0.027676 | 0.020515 | LTF/CCL5/L |
| MF | GO:000510 fibroblast g 5/879 | 25/18352  | 0.005948 | 0.028763 | 0.02132  | FGF10/FGF  |
| MF | GO:002302 MHC class 4/879    | 16/18352  | 0.005993 | 0.028796 | 0.021345 | HLA-DMB/   |
| MF | GO:003140 carboxylic 19/879  | 212/18352 | 0.006583 | 0.031435 | 0.023302 | S100A9/S1  |
| MF | GO:000504 scavenger 7/879    | 47/18352  | 0.006658 | 0.031593 | 0.023418 | MSR1/DMI   |
| MF | GO:000550 retinoid bir 6/879 | 36/18352  | 0.006746 | 0.031814 | 0.023582 | PTGDS/RBF  |
| MF | GO:003293 sterol bind 8/879  | 59/18352  | 0.006823 | 0.031979 | 0.023705 | CETP/PMP:  |
| MF | GO:003016 low-densit 4/879   | 17/18352  | 0.007544 | 0.035143 | 0.02605  | MSR1/SCA   |
| MF | GO:001984 isoprenoid 6/879   | 37/18352  | 0.007733 | 0.035804 | 0.02654  | PTGDS/RBF  |
| MF | GO:000470 MAP kinas 4/879    | 18/18352  | 0.009337 | 0.042717 | 0.031664 | MAPK3/PA   |
| MF | GO:004696 retinoid X r 4/879 | 18/18352  | 0.009337 | 0.042717 | 0.031664 | PPARG/VD   |
| MF | GO:001920 kinase acti 10/879 | 89/18352  | 0.010036 | 0.045579 | 0.033786 | LTF/CCL5/L |

|    |                            |        |           |          |          |          |            |
|----|----------------------------|--------|-----------|----------|----------|----------|------------|
| MF | GO:001712 SH3 domain       | 13/879 | 131/18352 | 0.010143 | 0.045579 | 0.033786 | MAPT/PLSG  |
| MF | GO:003631 phosphatidyl     | 3/879  | 10/18352  | 0.010202 | 0.045579 | 0.033786 | PIK3R1/CBI |
| MF | GO:004356 insulin recep    | 3/879  | 10/18352  | 0.010202 | 0.045579 | 0.033786 | PIK3R1/PIK |
| MF | GO:000814 drug binding     | 11/879 | 104/18352 | 0.011037 | 0.049025 | 0.03634  | HSP90AB1,  |
| MF | GO:004323 laminin binding  | 5/879  | 29/18352  | 0.011357 | 0.050153 | 0.037176 | TINAGL1/IT |
| MF | GO:004317 organic acid     | 19/879 | 224/18352 | 0.011531 | 0.050629 | 0.037528 | S100A9/S1  |
| MF | GO:004698 protein hetero   | 25/879 | 321/18352 | 0.011862 | 0.051786 | 0.038386 | CYBB/IKBK  |
| MF | GO:000486 protein kinase   | 8/879  | 65/18352  | 0.012095 | 0.052505 | 0.03892  | SOCS3/SOC  |
| MF | GO:004840 platelet-derived | 3/879  | 11/18352  | 0.013534 | 0.058417 | 0.043302 | PDGFRB/PI  |
| MF | GO:003169 adrenergic       | 4/879  | 20/18352  | 0.013704 | 0.058821 | 0.043601 | ARRB1/ADI  |

| ID       | Descriptor   | GeneRatio | BgRatio  | pvalue   | p.adjust | qvalue   | geneID     | Count |
|----------|--------------|-----------|----------|----------|----------|----------|------------|-------|
| hsa04060 | Cytokine-c   | 144/643   | 295/8096 | 6.07E-83 | 1.54E-80 | 6.78E-81 | CD4/IFNG/  | 144   |
| hsa04061 | Viral protei | 58/643    | 100/8096 | 1.69E-38 | 2.15E-36 | 9.44E-37 | LTA/CXCL1  | 58    |
| hsa05169 | Epstein-Ba   | 74/643    | 202/8096 | 1.51E-31 | 1.28E-29 | 5.63E-30 | B2M/CALR   | 74    |
| hsa04062 | Chemokine    | 71/643    | 192/8096 | 1.39E-30 | 8.83E-29 | 3.88E-29 | CXCL14/CX  | 71    |
| hsa04650 | Natural kill | 55/643    | 131/8096 | 4.20E-27 | 2.14E-25 | 9.38E-26 | FCER1G/HI  | 55    |
| hsa04630 | JAK-STAT s   | 59/643    | 162/8096 | 4.12E-25 | 1.74E-23 | 7.65E-24 | IFNG/IFNL1 | 59    |
| hsa05417 | Lipid and a  | 66/643    | 215/8096 | 3.73E-23 | 1.35E-21 | 5.95E-22 | HSPA2/HSF  | 66    |
| hsa05323 | Rheumatoi    | 40/643    | 93/8096  | 1.88E-20 | 5.96E-19 | 2.62E-19 | CTSL/HLA-I | 40    |
| hsa04620 | Toll-like re | 42/643    | 104/8096 | 3.75E-20 | 1.06E-18 | 4.65E-19 | CXCL8/CXC  | 42    |
| hsa05163 | Human cyt    | 63/643    | 225/8096 | 8.30E-20 | 2.11E-18 | 9.26E-19 | B2M/CALR   | 63    |
| hsa05164 | Influenza A  | 54/643    | 172/8096 | 1.34E-19 | 2.87E-18 | 1.26E-18 | HLA-DMB/   | 54    |
| hsa04668 | TNF signali  | 43/643    | 112/8096 | 1.35E-19 | 2.87E-18 | 1.26E-18 | ICAM1/LTA  | 43    |
| hsa04064 | NF-kappa E   | 41/643    | 104/8096 | 3.09E-19 | 6.03E-18 | 2.65E-18 | ICAM1/LTA  | 41    |
| hsa05167 | Kaposi sarc  | 57/643    | 194/8096 | 4.31E-19 | 7.82E-18 | 3.43E-18 | HLA-A/HLA  | 57    |
| hsa04380 | Osteoclast   | 45/643    | 128/8096 | 1.12E-18 | 1.84E-17 | 8.07E-18 | IFNG/RELB  | 45    |
| hsa05162 | Measles      | 47/643    | 139/8096 | 1.16E-18 | 1.84E-17 | 8.07E-18 | HSPA2/TLR  | 47    |
| hsa04621 | NOD-like re  | 53/643    | 184/8096 | 2.12E-17 | 3.16E-16 | 1.39E-16 | CTSB/HSP9  | 53    |
| hsa04659 | Th17 cell d  | 39/643    | 108/8096 | 8.43E-17 | 1.19E-15 | 5.23E-16 | CD4/HLA-D  | 39    |
| hsa04660 | T cell recep | 38/643    | 104/8096 | 1.34E-16 | 1.79E-15 | 7.87E-16 | CD4/IFNG/  | 38    |
| hsa04657 | IL-17 signal | 36/643    | 94/8096  | 1.49E-16 | 1.89E-15 | 8.30E-16 | HSP90AA1,  | 36    |
| hsa05170 | Human imr    | 56/643    | 212/8096 | 1.89E-16 | 2.29E-15 | 1.00E-15 | B2M/CALR   | 56    |
| hsa04010 | MAPK signi   | 66/643    | 294/8096 | 2.48E-15 | 2.86E-14 | 1.26E-14 | HSPA2/REL  | 66    |
| hsa05142 | Chagas dis   | 35/643    | 102/8096 | 2.03E-14 | 2.24E-13 | 9.84E-14 | CALR/IFNG  | 35    |
| hsa04625 | C-type lect  | 35/643    | 104/8096 | 3.98E-14 | 4.21E-13 | 1.85E-13 | FCER1G/RE  | 35    |
| hsa04612 | Antigen pr   | 30/643    | 78/8096  | 4.63E-14 | 4.71E-13 | 2.07E-13 | B2M/CALR   | 30    |
| hsa05160 | Hepatitis C  | 43/643    | 157/8096 | 1.76E-13 | 1.72E-12 | 7.55E-13 | IFNG/CXCL  | 43    |
| hsa05135 | Yersinia inf | 39/643    | 137/8096 | 6.34E-13 | 5.96E-12 | 2.62E-12 | CD4/CXCL8  | 39    |
| hsa04933 | AGE-RAGE     | 32/643    | 100/8096 | 2.41E-12 | 2.19E-11 | 9.62E-12 | ICAM1/CXC  | 32    |
| hsa04015 | Rap1 signa   | 49/643    | 210/8096 | 2.62E-12 | 2.29E-11 | 1.01E-11 | VEGFA/F2F  | 49    |
| hsa05171 | Coronaviru   | 52/643    | 232/8096 | 2.89E-12 | 2.44E-11 | 1.07E-11 | CXCL8/CXC  | 52    |
| hsa05321 | Inflammat    | 25/643    | 65/8096  | 6.24E-12 | 5.11E-11 | 2.25E-11 | HLA-DMB/   | 25    |
| hsa05133 | Pertussis    | 27/643    | 76/8096  | 8.01E-12 | 6.09E-11 | 2.68E-11 | CXCL8/CXC  | 27    |
| hsa04151 | PI3K-Akt si  | 67/643    | 354/8096 | 8.15E-12 | 6.09E-11 | 2.68E-11 | HSP90AA1,  | 67    |
| hsa05330 | Allograft re | 19/643    | 38/8096  | 8.15E-12 | 6.09E-11 | 2.68E-11 | HLA-A/HLA  | 19    |
| hsa05140 | Leishmania   | 27/643    | 77/8096  | 1.14E-11 | 8.29E-11 | 3.64E-11 | HLA-DMB/   | 27    |
| hsa04940 | Type I diab  | 20/643    | 43/8096  | 1.26E-11 | 8.89E-11 | 3.90E-11 | HLA-A/HLA  | 20    |
| hsa01521 | EGFR tyros   | 27/643    | 79/8096  | 2.28E-11 | 1.56E-10 | 6.87E-11 | VEGFA/MA   | 27    |
| hsa05332 | Graft-versu  | 19/643    | 42/8096  | 7.60E-11 | 5.08E-10 | 2.23E-10 | HLA-A/HLA  | 19    |

|          |               |         |          |          |          |          |           |    |
|----------|---------------|---------|----------|----------|----------|----------|-----------|----|
| hsa05166 | Human T-c     | 48/643  | 222/8096 | 7.96E-11 | 5.19E-10 | 2.28E-10 | B2M/CALR  | 48 |
| hsa05218 | Melanoma      | 25/643  | 72/8096  | 8.56E-11 | 5.43E-10 | 2.39E-10 | MAPK3/PD  | 25 |
| hsa05340 | Primary im    | 18/643  | 38/8096  | 9.30E-11 | 5.76E-10 | 2.53E-10 | CD4/TAP1/ | 18 |
| hsa04014 | Ras signalir  | 49/643  | 232/8096 | 1.21E-10 | 7.30E-10 | 3.21E-10 | VEGFA/MA  | 49 |
| hsa04012 | ErbB signal   | 27/643  | 85/8096  | 1.56E-10 | 9.19E-10 | 4.04E-10 | MAPK3/SR  | 27 |
| hsa05161 | Hepatitis B   | 39/643  | 162/8096 | 1.79E-10 | 1.03E-09 | 4.53E-10 | CXCL8/TGF | 39 |
| hsa04658 | Th1 and Th    | 28/643  | 92/8096  | 2.19E-10 | 1.24E-09 | 5.44E-10 | CD4/HLA-D | 28 |
| hsa04510 | Focal adhe    | 44/643  | 201/8096 | 3.31E-10 | 1.83E-09 | 8.04E-10 | VEGFA/ITG | 44 |
| hsa04662 | B cell rece   | 26/643  | 82/8096  | 3.57E-10 | 1.93E-09 | 8.49E-10 | MAPK3/CD  | 26 |
| hsa05152 | Tuberculos    | 41/643  | 180/8096 | 3.77E-10 | 1.99E-09 | 8.76E-10 | FCER1G/HI | 41 |
| hsa05235 | PD-L1 expr    | 27/643  | 89/8096  | 5.02E-10 | 2.60E-09 | 1.14E-09 | CD4/IFNG/ | 27 |
| hsa05418 | Fluid shear   | 34/643  | 139/8096 | 1.73E-09 | 8.78E-09 | 3.86E-09 | CTSL/HSP9 | 34 |
| hsa04672 | Intestinal ir | 19/643  | 49/8096  | 1.88E-09 | 9.35E-09 | 4.11E-09 | HLA-DMB/  | 19 |
| hsa04360 | Axon guida    | 40/643  | 182/8096 | 1.91E-09 | 9.35E-09 | 4.11E-09 | CXCL12/M, | 40 |
| hsa05416 | Viral myoc    | 21/643  | 60/8096  | 2.38E-09 | 1.14E-08 | 5.01E-09 | HLA-A/HLA | 21 |
| hsa05144 | Malaria       | 19/643  | 50/8096  | 2.82E-09 | 1.32E-08 | 5.82E-09 | ICAM1/IFN | 19 |
| hsa04210 | Apoptosis     | 33/643  | 136/8096 | 3.75E-09 | 1.73E-08 | 7.61E-09 | CTSB/CTSL | 33 |
| hsa05145 | Toxoplasm     | 29/643  | 112/8096 | 6.88E-09 | 3.12E-08 | 1.37E-08 | HLA-DMB/  | 29 |
| hsa05214 | Glioma        | 23/643  | 75/8096  | 7.76E-09 | 3.46E-08 | 1.52E-08 | MAPK3/PD  | 23 |
| hsa05215 | Prostate ca   | 26/643  | 97/8096  | 1.92E-08 | 8.42E-08 | 3.70E-08 | HSP90AA1, | 26 |
| hsa04145 | Phagosome     | 34/643  | 152/8096 | 2.01E-08 | 8.66E-08 | 3.81E-08 | CALR/CTSL | 34 |
| hsa05205 | Proteoglyc    | 41/643  | 205/8096 | 2.21E-08 | 9.34E-08 | 4.10E-08 | CTSL/TGFB | 41 |
| hsa05224 | Breast can    | 33/643  | 147/8096 | 2.97E-08 | 1.23E-07 | 5.39E-08 | MAPK3/WI  | 33 |
| hsa04640 | Hematopoi     | 26/643  | 99/8096  | 3.05E-08 | 1.23E-07 | 5.39E-08 | CD1C/CD1I | 26 |
| hsa04664 | Fc epsilon    | 121/643 | 68/8096  | 3.05E-08 | 1.23E-07 | 5.39E-08 | FCER1G/TN | 21 |
| hsa04810 | Regulation    | 42/643  | 218/8096 | 4.58E-08 | 1.82E-07 | 7.99E-08 | CXCL12/TN | 42 |
| hsa04917 | Prolactin si  | 21/643  | 70/8096  | 5.37E-08 | 2.10E-07 | 9.22E-08 | STAT1/SOC | 21 |
| hsa04066 | HIF-1 signa   | 27/643  | 109/8096 | 6.30E-08 | 2.42E-07 | 1.06E-07 | IFNG/CYBB | 27 |
| hsa05223 | Non-small     | 121/643 | 72/8096  | 9.25E-08 | 3.51E-07 | 1.54E-07 | MAPK3/NR  | 21 |
| hsa05134 | Legionellos   | 18/643  | 57/8096  | 2.03E-07 | 7.60E-07 | 3.34E-07 | HSPA2/CXC | 18 |
| hsa05211 | Renal cell c  | 20/643  | 69/8096  | 2.10E-07 | 7.73E-07 | 3.39E-07 | TGFB1/VEC | 20 |
| hsa04217 | Necroptosi    | 33/643  | 159/8096 | 2.17E-07 | 7.87E-07 | 3.46E-07 | HSP90AA1, | 33 |
| hsa05146 | Amoebiasis    | 25/643  | 102/8096 | 2.42E-07 | 8.67E-07 | 3.81E-07 | CD1C/CD1I | 25 |
| hsa05212 | Pancreatic    | 21/643  | 76/8096  | 2.57E-07 | 9.05E-07 | 3.98E-07 | TGFB1/STA | 21 |
| hsa05320 | Autoimmu      | 17/643  | 53/8096  | 3.45E-07 | 1.20E-06 | 5.28E-07 | HLA-A/HLA | 17 |
| hsa05165 | Human pa      | 53/643  | 331/8096 | 4.89E-07 | 1.68E-06 | 7.37E-07 | HLA-A/HLA | 53 |
| hsa05221 | Acute myel    | 19/643  | 67/8096  | 6.16E-07 | 2.09E-06 | 9.16E-07 | PML/MAPK  | 19 |
| hsa04350 | TGF-beta si   | 23/643  | 94/8096  | 7.58E-07 | 2.53E-06 | 1.11E-06 | IFNG/TGFB | 23 |
| hsa04622 | RIG-I-like r  | 19/643  | 70/8096  | 1.29E-06 | 4.25E-06 | 1.87E-06 | CXCL8/CXC | 19 |
| hsa04072 | Phospholip    | 30/643  | 148/8096 | 1.31E-06 | 4.27E-06 | 1.88E-06 | FCER1G/CX | 30 |
| hsa01522 | Endocrine     | 123/643 | 98/8096  | 1.66E-06 | 5.35E-06 | 2.35E-06 | MMP9/MA   | 23 |
| hsa04370 | VEGF signa    | 17/643  | 59/8096  | 1.89E-06 | 5.99E-06 | 2.63E-06 | VEGFA/MA  | 17 |
| hsa05222 | Small cell    | 122/643 | 92/8096  | 2.00E-06 | 6.27E-06 | 2.75E-06 | ITGAV/TRA | 22 |
| hsa04670 | Leukocyte     | 25/643  | 114/8096 | 2.26E-06 | 6.99E-06 | 3.07E-06 | ICAM1/CXC | 25 |
| hsa05203 | Viral carcin  | 36/643  | 204/8096 | 3.75E-06 | 1.15E-05 | 5.04E-06 | HLA-A/HLA | 36 |
| hsa04020 | Calcium sig   | 40/643  | 240/8096 | 4.75E-06 | 1.44E-05 | 6.31E-06 | VEGFA/F2F | 40 |
| hsa05220 | Chronic my    | 19/643  | 76/8096  | 4.93E-06 | 1.47E-05 | 6.48E-06 | TGFB1/MA  | 19 |
| hsa04666 | Fc gamma      | 22/643  | 97/8096  | 5.10E-06 | 1.50E-05 | 6.58E-06 | MAPK3/HC  | 22 |
| hsa04935 | Growth ho     | 25/643  | 119/8096 | 5.13E-06 | 1.50E-05 | 6.58E-06 | STAT1/SOC | 25 |
| hsa04929 | GnRH secr     | 17/643  | 64/8096  | 6.43E-06 | 1.86E-05 | 8.15E-06 | MAPK3/AR  | 17 |

|          |              |        |          |          |          |          |            |    |
|----------|--------------|--------|----------|----------|----------|----------|------------|----|
| hsa03050 | Proteasom    | 14/643 | 46/8096  | 7.56E-06 | 2.14E-05 | 9.39E-06 | IFNG/PSMI  | 14 |
| hsa04610 | Compleme     | 20/643 | 85/8096  | 7.57E-06 | 2.14E-05 | 9.39E-06 | PROCR/PL   | 20 |
| hsa05210 | Colorectal   | 20/643 | 86/8096  | 9.15E-06 | 2.55E-05 | 1.12E-05 | TGFB1/MA   | 20 |
| hsa04218 | Cellular ser | 29/643 | 156/8096 | 1.18E-05 | 3.26E-05 | 1.43E-05 | HLA-A/HLA  | 29 |
| hsa04514 | Cell adhesi  | 28/643 | 149/8096 | 1.35E-05 | 3.69E-05 | 1.62E-05 | CD4/HLA-A  | 28 |
| hsa05202 | Transcripti  | 33/643 | 192/8096 | 1.69E-05 | 4.56E-05 | 2.00E-05 | CXCL8/MM   | 33 |
| hsa05207 | Chemical c   | 35/643 | 212/8096 | 2.30E-05 | 6.16E-05 | 2.71E-05 | HSP90AA1,  | 35 |
| hsa05226 | Gastric can  | 27/643 | 149/8096 | 3.78E-05 | 0.0001   | 4.39E-05 | TGFB1/MA   | 27 |
| hsa05150 | Staphyloco   | 20/643 | 96/8096  | 5.07E-05 | 0.000133 | 5.84E-05 | HLA-DMB/   | 20 |
| hsa05219 | Bladder cai  | 12/643 | 41/8096  | 5.24E-05 | 0.000136 | 5.96E-05 | CXCL8/MM   | 12 |
| hsa04926 | Relaxin sig  | 24/643 | 129/8096 | 6.54E-05 | 0.000168 | 7.37E-05 | TGFB1/MM   | 24 |
| hsa05231 | Choline me   | 20/643 | 98/8096  | 6.91E-05 | 0.000175 | 7.70E-05 | MAPK3/PD   | 20 |
| hsa04613 | Neutrophil   | 31/643 | 190/8096 | 8.44E-05 | 0.000212 | 9.33E-05 | TLR2/CTSG  | 31 |
| hsa04623 | Cytosolic D  | 15/643 | 63/8096  | 8.96E-05 | 0.000223 | 9.80E-05 | CXCL10/IL1 | 15 |
| hsa05143 | African try  | 11/643 | 37/8096  | 9.17E-05 | 0.000226 | 9.94E-05 | ICAM1/IFN  | 11 |
| hsa05225 | Hepatocell   | 28/643 | 168/8096 | 0.000127 | 0.00031  | 0.000136 | TGFB1/MA   | 28 |
| hsa04722 | Neurotropl   | 21/643 | 119/8096 | 0.000393 | 0.000952 | 0.000418 | MAPK3/FA   | 21 |
| hsa05310 | Asthma       | 9/643  | 31/8096  | 0.000487 | 0.001168 | 0.000513 | FCER1G/HI  | 9  |
| hsa01524 | Platinum d   | 15/643 | 73/8096  | 0.000507 | 0.001202 | 0.000528 | MAPK3/FA   | 15 |
| hsa05131 | Shigellosis  | 35/643 | 247/8096 | 0.00052  | 0.001223 | 0.000537 | CXCL8/IL1E | 35 |
| hsa04068 | FoxO signa   | 22/643 | 131/8096 | 0.000588 | 0.00137  | 0.000602 | TGFB1/TNF  | 22 |
| hsa04611 | Platelet act | 21/643 | 124/8096 | 0.000694 | 0.001603 | 0.000704 | FCER1G/F2  | 21 |
| hsa04550 | Signaling p  | 23/643 | 143/8096 | 0.000831 | 0.001868 | 0.000821 | MAPK3/WI   | 23 |
| hsa05017 | Spinocereb   | 23/643 | 143/8096 | 0.000831 | 0.001868 | 0.000821 | NFYA/PSM   | 23 |
| hsa05130 | Pathogenic   | 29/643 | 197/8096 | 0.000831 | 0.001868 | 0.000821 | CXCL8/IL1E | 29 |
| hsa05020 | Prion disea  | 37/643 | 273/8096 | 0.00086  | 0.001915 | 0.000841 | HSPA2/HSF  | 37 |
| hsa05322 | Systemic lu  | 22/643 | 136/8096 | 0.000989 | 0.002184 | 0.000959 | HLA-DMB/   | 22 |
| hsa05120 | Epithelial c | 14/643 | 70/8096  | 0.001023 | 0.002241 | 0.000984 | CXCL8/CXC  | 14 |
| hsa04915 | Estrogen si  | 22/643 | 138/8096 | 0.001205 | 0.002616 | 0.001149 | HSPA2/HSF  | 22 |
| hsa04919 | Thyroid ho   | 20/643 | 121/8096 | 0.00126  | 0.002712 | 0.001191 | STAT1/ITG, | 20 |
| hsa04540 | Gap junctio  | 16/643 | 88/8096  | 0.001357 | 0.002896 | 0.001272 | MAPK3/GN   | 16 |
| hsa04080 | Neuroactiv   | 43/643 | 342/8096 | 0.001596 | 0.003379 | 0.001484 | CTSG/F2R/  | 43 |
| hsa05168 | Herpes sim   | 58/643 | 497/8096 | 0.001655 | 0.003468 | 0.001524 | B2M/CALR   | 58 |
| hsa04750 | Inflammatr   | 17/643 | 98/8096  | 0.001666 | 0.003468 | 0.001524 | IL1B/F2RL1 | 17 |
| hsa04920 | Adipocytok   | 13/643 | 69/8096  | 0.002689 | 0.005552 | 0.002439 | TNF/ADIPC  | 13 |
| hsa04390 | Hippo sign   | 23/643 | 157/8096 | 0.002951 | 0.006046 | 0.002656 | TGFB1/WN   | 23 |
| hsa04024 | cAMP sign    | 29/643 | 219/8096 | 0.004236 | 0.008608 | 0.003782 | F2R/MAPK   | 29 |
| hsa05132 | Salmonella   | 32/643 | 249/8096 | 0.004363 | 0.008795 | 0.003863 | HSP90AA1,  | 32 |
| hsa05010 | Alzheimer    | 45/643 | 384/8096 | 0.004956 | 0.009912 | 0.004354 | PSMC2/PSI  | 45 |
| hsa04071 | Sphingolipi  | 18/643 | 119/8096 | 0.005751 | 0.011412 | 0.005013 | FCER1G/TN  | 18 |
| hsa05100 | Bacterial in | 13/643 | 77/8096  | 0.00712  | 0.014019 | 0.006158 | SRC/PTK2/  | 13 |
| hsa04960 | Aldosteron   | 8/643  | 37/8096  | 0.007414 | 0.014486 | 0.006363 | MAPK3/PIK  | 8  |
| hsa05230 | Central car  | 12/643 | 70/8096  | 0.008441 | 0.016367 | 0.00719  | MAPK3/PD   | 12 |
| hsa04213 | Longevity r  | 11/643 | 62/8096  | 0.008853 | 0.017035 | 0.007483 | HSPA2/HD,  | 11 |
| hsa04930 | Type II diat | 9/643  | 46/8096  | 0.009125 | 0.017427 | 0.007655 | TNF/ADIPC  | 9  |
| hsa04211 | Longevity r  | 14/643 | 89/8096  | 0.009993 | 0.018943 | 0.008321 | ADIPOQ/PI  | 14 |
| hsa04932 | Non-alchoh   | 21/643 | 155/8096 | 0.01072  | 0.020021 | 0.008795 | CXCL8/TGF  | 21 |
| hsa04934 | Cushing sy   | 21/643 | 155/8096 | 0.01072  | 0.020021 | 0.008795 | MAPK3/GN   | 21 |
| hsa04115 | p53 signal   | 12/643 | 73/8096  | 0.01174  | 0.021766 | 0.009561 | TNFRSF10E  | 12 |
| hsa04923 | Regulation   | 10/643 | 57/8096  | 0.013274 | 0.024432 | 0.010733 | GNAI1/PTC  | 10 |

|          |             |        |          |          |          |          |            |    |
|----------|-------------|--------|----------|----------|----------|----------|------------|----|
| hsa05213 | Endometri   | 10/643 | 58/8096  | 0.014937 | 0.027295 | 0.01199  | MAPK3/NR   | 10 |
| hsa04924 | Renin secre | 11/643 | 69/8096  | 0.019218 | 0.034868 | 0.015317 | CTSB/GNAI  | 11 |
| hsa04928 | Parathyroid | 15/643 | 106/8096 | 0.019807 | 0.035681 | 0.015674 | MAPK3/GN   | 15 |
| hsa04520 | Adherens j  | 11/643 | 71/8096  | 0.023387 | 0.041834 | 0.018377 | MAPK3/SR   | 11 |
| hsa04371 | Apelin sign | 18/643 | 138/8096 | 0.024636 | 0.043759 | 0.019223 | MAPK3/GN   | 18 |
| hsa04152 | AMPK sign   | 16/643 | 120/8096 | 0.027433 | 0.048389 | 0.021257 | ADIPOQ/PI  | 16 |
| hsa04725 | Cholinergic | 15/643 | 113/8096 | 0.033195 | 0.058149 | 0.025544 | MAPK3/GN   | 15 |
| hsa04215 | Apoptosis - | 6/643  | 32/8096  | 0.03755  | 0.065141 | 0.028616 | BIRC5/BID/ | 6  |
| hsa04150 | mTOR sign   | 19/643 | 155/8096 | 0.0377   | 0.065141 | 0.028616 | TNF/MAPK   | 19 |
| hsa04730 | Long-term   | 9/643  | 60/8096  | 0.045799 | 0.078601 | 0.034529 | MAPK3/GN   | 9  |

Count

153  
131  
127  
132  
133  
135  
135  
130  
116  
119  
121  
106  
115  
125  
108  
106  
103  
110  
85  
100  
95  
79  
84  
81  
98  
106  
78  
92  
104  
77  
88  
76  
88  
78  
88  
84  
108  
104  
88  
81  
99  
87  
70  
74  
72  
59  
92  
74  
59



63  
91  
74  
68  
59  
54  
57  
61  
56  
56  
77  
77  
67  
57  
65  
55  
61  
86  
60  
63  
80  
53  
66  
44  
66  
77  
65  
45  
45  
55  
45  
45  
76  
53  
45  
63  
73  
81  
58  
47  
47  
50  
61  
43  
44  
87  
67  
47  
74  
61

46  
57  
51  
46  
59  
50  
41  
68  
51  
51  
52  
47  
53  
49  
41  
65  
59  
46  
47  
85  
46  
55  
61  
83  
52  
71  
40  
86  
37  
50  
82  
53  
47  
54  
42  
81  
40  
39  
67  
59  
60  
74  
39  
70  
60  
58  
46  
44  
38  
31

37  
76  
50  
33  
68  
35  
45  
42  
36  
37  
46  
51  
71  
67  
63  
68  
34  
47  
36  
76  
39  
65  
31  
31  
39  
43  
50  
37  
47  
39  
49  
47  
32  
52  
46  
56  
40  
46  
37  
36  
59  
43  
32  
62  
70  
37  
35  
32  
32  
48

26  
35  
33  
29  
51  
26  
50  
75  
43  
75  
41  
61  
35  
48  
26  
70  
41  
40  
49  
36  
47  
58  
25  
62  
72  
26  
31  
33  
44  
68  
45  
25  
42  
42  
26  
33  
24  
43  
68  
64  
30  
31  
32  
38  
45  
27  
50  
44  
25  
57

37  
30  
36  
40  
46  
68  
30  
25  
22  
41  
42  
51  
22  
35  
61  
40  
28  
33  
53  
64  
56  
44  
39  
29  
27  
38  
20  
20  
51  
30  
38  
21  
42  
18  
18  
24  
61  
35  
23  
64  
35  
58  
16  
45  
37  
49  
44  
33  
28  
25

37  
34  
20  
26  
22  
44  
39  
20  
23  
30  
46  
44  
37  
23  
39  
46  
30  
21  
56  
41  
55  
64  
20  
26  
27  
39  
55  
28  
63  
29  
18  
63  
47  
30  
28  
24  
17  
29  
42  
25  
28  
35  
22  
24  
21  
64  
23  
30  
15  
61

39  
14  
31  
27  
48  
32  
52  
61  
39  
36  
24  
27  
19  
19  
48  
37  
21  
26  
24  
12  
12  
20  
29  
19  
14  
37  
11  
30  
58  
20  
57  
19  
55  
31  
31  
42  
45  
18  
18  
36  
34  
38  
20  
49  
40  
22  
25  
25  
36  
20

32  
16  
16  
14  
51  
15  
61  
38  
37  
27  
18  
21  
37  
12  
23  
16  
54  
50  
56  
51  
41  
21  
34  
20  
23  
41  
13  
27  
39  
22  
23  
31  
25  
12  
20  
39  
33  
18  
18  
34  
31  
31  
45  
61  
30  
27  
13  
18  
21  
46



19  
27  
17  
20  
36  
18  
18  
18  
18  
35  
45  
17  
28  
50  
16  
16  
38  
13  
13  
44  
18  
43  
33  
23  
19  
59  
26  
21  
37  
23  
16  
16  
12  
22  
13  
42  
37  
15  
18  
18  
19  
23  
42  
37  
55  
33  
31  
57  
13  
51

29  
47  
32  
57  
17  
26  
29  
15  
57  
20  
22  
23  
19  
46  
15  
27  
23  
23  
11  
25  
22  
18  
18  
31  
14  
14  
21  
33  
20  
46  
32  
16  
43  
34  
19  
27  
40  
11  
26  
14  
25  
12  
16  
30  
10  
23  
15  
15  
29  
14

14  
23  
8  
42  
22  
15  
43  
28  
21  
13  
13  
24  
18  
37  
23  
43  
40  
17  
24  
15  
12  
12  
21  
21  
55  
20  
26  
43  
24  
35  
29  
22  
14  
14  
12  
35  
47  
16  
13  
15  
10  
8  
11  
11  
17  
17  
19  
23  
23  
22

15  
30  
19  
19  
12  
12  
12  
12  
12  
13  
13  
18  
20  
37  
15  
18  
18  
11  
11  
11  
54  
20  
22  
10  
10  
13  
27  
30  
30  
12  
15  
14  
14  
19  
51  
34  
9  
44  
44  
13  
11  
11  
22  
19  
19  
12  
12  
14  
14  
20  
10

10  
17  
15  
13  
18  
14  
17  
46  
19  
50  
43  
26  
26  
18  
9  
10  
13  
35  
18  
20  
20  
30  
25  
8  
12  
12  
22  
19  
35  
15  
15  
15  
15  
16  
23  
10  
10  
18  
19  
28  
12  
12  
35  
25  
9  
14  
11  
11  
11  
11

13  
19  
31  
28  
27  
32  
14  
14  
12  
16  
13  
8  
10  
32  
41  
19  
14  
9  
9  
9  
9  
9  
15  
28  
13  
30  
45  
36  
25  
31  
14  
11  
11  
11  
15  
29  
13  
12  
41  
18  
18  
14  
14  
8  
24  
40  
9  
37  
42  
19

19  
11  
11  
11  
11  
13  
22  
21  
7  
7  
7  
10  
10  
15  
19  
26  
27  
26  
13  
15  
15  
36  
11  
11  
39  
12  
10  
8  
26  
15  
15  
13  
13  
14  
19  
26  
23  
36  
12  
11  
23  
23  
23  
13  
13  
13  
28  
7  
7  
7

25  
23  
23  
23  
33  
24  
44  
27  
22  
12  
16  
24  
11  
11  
11  
14  
18  
18  
13  
8  
8  
24  
17  
15  
21  
16  
10  
14  
13  
9  
11  
11  
11  
15  
15  
32  
19  
14  
12  
27  
40  
28  
16  
7  
7  
7  
7  
7  
7  
26



35  
23  
11  
11  
11  
34  
30  
14  
32  
16  
9  
9  
9  
15  
12  
28  
40  
14  
14  
28  
10  
18  
12  
16  
8  
8  
26  
15  
9  
9  
23  
11  
13  
7  
7  
7  
7  
7  
31  
10  
10  
10  
12  
12  
15  
14  
36  
17  
13  
13

11  
11  
11  
11  
30  
14  
9  
9  
12  
32  
40  
8  
8  
8  
8  
16  
18  
10  
27  
17  
34  
6  
6  
29  
15  
13  
31  
33  
20  
18  
17  
11  
11  
7  
7  
30  
23  
39  
13  
37  
26  
16  
47  
12  
12  
8  
8  
11  
11  
11

16  
16  
20  
13  
13  
28  
31  
36  
9  
11  
13  
20  
20  
7  
7  
7  
6  
6  
16  
23  
18  
8  
12  
19  
14  
10  
13  
17  
17  
25  
11  
15  
9  
9  
9  
9  
19  
19  
23  
23  
14  
14  
14  
14  
28  
12  
12  
23  
10  
10

11  
11  
17  
27  
20  
29  
8  
8  
8  
7  
7  
7  
7  
7  
7  
7  
7  
12  
13  
9  
28  
29  
17  
44  
19  
19  
11  
11  
10  
10  
6  
6  
6  
13  
16  
14  
9  
9  
23  
13  
13  
20  
10  
27  
14  
14  
7  
7  
7  
39  
13

13  
13  
11  
15  
14  
12  
12  
9  
9  
10  
10  
8  
18  
17  
17  
6  
6  
6  
6  
14  
14  
39  
12  
7  
7  
7  
15  
9  
39  
14  
18  
17  
11  
11  
8  
18  
22  
10  
9  
9  
12  
11  
16  
24  
22  
14  
13  
27  
20  
7

7  
7  
18  
18  
6  
6  
28  
31  
8  
38  
12  
12  
12  
10  
14  
38  
13  
11  
24  
26  
22  
14  
12  
38  
25  
43  
8  
39  
7  
7  
14  
14  
38  
9  
9  
9  
9  
16  
21  
41  
38  
6  
6  
6  
6  
6  
6  
6  
10  
10

10  
10  
10  
14  
16  
13  
12  
8  
9  
14  
28  
7  
7  
7  
7  
7  
5  
5  
5  
5  
5  
5  
5  
5  
5  
10  
13  
12  
20  
18  
18  
14  
28  
26  
15  
35  
24  
11  
9  
9  
13  
26  
8  
12  
16  
22  
6  
6  
6  
6

6  
6  
6  
14  
15  
13  
7  
7  
7  
12  
15  
21  
28  
29  
29  
9  
10  
10  
42  
13  
8  
8  
18  
36  
11  
30  
5  
5  
5  
5  
15  
10  
9  
9  
9  
6  
6  
6  
6  
7  
7  
7  
7  
16  
12  
11  
17  
17  
33  
8



22  
34  
14  
16  
20  
20  
10  
10  
10  
10  
23  
12  
9  
19  
15  
11  
11  
20  
13  
13  
7  
7  
7  
8  
12  
10  
10  
10  
17  
14  
14  
11  
13  
6  
6  
6  
6  
30  
32  
32  
28  
20  
18  
18  
15  
15  
16  
12  
19  
19

5  
5  
5  
5  
5  
13  
10  
10  
18  
11  
8  
8  
8  
8  
16  
20  
38  
7  
7  
7  
7  
14  
14  
14  
13  
22  
19  
17  
16  
29  
24  
14  
6  
6  
6  
6  
6  
41  
36  
23  
15  
15  
15  
8  
8  
22  
18  
20  
10  
30

7  
7  
7  
7  
16  
26  
13  
5  
5  
5  
5  
5  
5  
5  
5  
5  
5  
14  
14  
9  
21  
30  
23  
18  
8  
8  
8  
13  
10  
10  
12  
38  
6  
6  
6  
6  
6  
6  
6  
14  
26  
18  
38  
11  
7  
7  
7  
9  
16  
10

27  
15  
26  
41  
24  
36  
8  
17  
13  
13  
13  
32  
14  
15  
20  
18  
23  
9  
9  
39  
13  
6  
6  
6  
6  
5  
5  
5  
5  
5  
5  
5  
7  
7  
11  
18  
8  
8  
16  
13  
10  
17  
18  
18  
9  
9  
11  
7  
7  
7  
7

7  
14  
20  
10  
16  
21  
6  
6  
6  
17  
9  
9  
9  
20  
5  
5  
5  
5  
5  
5  
5  
17  
14  
13  
16  
18  
7  
7  
7  
9  
23  
17  
6  
6  
6  
6  
8  
9  
9  
9  
9  
38  
16  
17  
17  
22  
7  
7  
7  
20  
27

11  
11  
15  
10  
10  
16  
5  
5  
5  
5  
5  
5  
32  
14  
12  
28  
25  
21  
9  
31  
8  
6  
6  
6  
6  
6  
6  
10  
10  
13  
13  
15  
17  
7  
7  
7  
7  
20  
9  
14  
14  
4  
4  
4  
4  
4  
4  
4  
4  
4  
4

4  
4  
4  
4  
4  
4  
4  
4  
8  
8  
8  
13  
13  
20  
20  
32  
20  
5  
5  
5  
5  
5  
5  
5  
5  
5  
11  
11  
6  
6  
6  
6  
27  
9  
7  
7  
7  
7  
7  
7  
7  
22  
22  
17  
8  
22  
24  
21  
21  
13  
20  
17





14  
9  
9  
9  
9  
11  
6  
6  
6  
6  
6  
6  
13  
13  
15  
20  
19  
12  
8  
11  
9  
9  
9  
5  
5  
5  
5  
5  
5  
7  
7  
15  
13  
13  
32  
22  
18  
11  
11  
6  
6  
6  
6  
6  
6  
6  
6  
8  
8  
4  
4  
4

4  
4  
4  
4  
4  
4  
4  
4  
4  
4  
4  
12  
12  
15  
7  
7  
7  
7  
7  
7  
7  
7  
20  
11  
15  
9  
9  
5  
5  
5  
5  
5  
5  
5  
5  
5  
5  
8  
8  
8  
8  
8  
8  
13  
31  
10  
15  
21  
21  
7  
7  
7  
7



4  
7  
7  
7  
7  
7  
7  
9  
9  
9  
9  
5  
5  
5  
5  
5  
5  
5  
5  
5  
5  
5  
5  
5  
5  
12  
12  
8  
24  
22  
19  
14  
7  
7  
7  
8  
8  
8  
6  
6  
6  
6  
6  
17  
11  
15  
15  
12  
10  
10  
10  
9  
9

5  
5  
5  
5  
5  
5  
5  
5  
5  
5  
5  
15  
12  
12  
8  
8  
8  
7  
7  
4  
4  
4  
4  
4  
4  
4  
4  
4  
4  
4  
4  
4  
4  
4  
4  
4  
4  
15  
9  
9  
6  
6  
27  
13  
17  
24  
15  
8  
7  
7  
7  
28  
9  
9  
9



12  
12  
11  
20  
29  
5  
5  
5  
5  
5  
5  
5  
5  
9  
15  
15  
14  
6  
6  
6  
6  
6  
6  
18  
12  
12  
7  
7  
7  
7  
7  
7  
7  
11  
13  
18  
9  
9  
22  
34  
8  
13  
18  
6  
6  
6  
6  
6  
6  
7

7  
5  
5  
5  
5  
5  
5  
5  
5  
5  
24  
4  
4  
4  
4  
4  
4  
4  
4  
4  
4  
12  
19  
9  
8  
8  
8  
8  
10  
34  
12  
12  
7  
7  
7  
7  
11  
6  
6  
8  
12  
13  
13  
5  
5  
5  
5  
5  
5  
5



5  
20  
9  
36  
10  
14  
7  
7  
7  
4  
4  
4  
4  
4  
4  
4  
8  
31  
6  
18  
18  
13  
10  
10  
10  
16  
14  
5  
5  
5  
5  
5  
5  
8  
8  
8  
8  
7  
7  
12  
10  
10  
17  
9  
6  
6  
6  
6  
6  
6



3  
3  
3  
3  
3  
3  
3  
3  
3  
3  
3  
3  
11  
7  
7  
7  
24  
21  
12  
12  
8  
8  
8  
8  
14  
9  
9  
9  
9  
6  
6  
6  
5  
5  
5  
5  
5  
5  
5  
5  
4  
4  
4  
4  
4  
4  
4  
4  
4  
4  
4  
4  
4







3  
6  
6  
6  
6  
10  
10  
31  
14  
34  
13  
15  
7  
7  
7  
14  
12  
4  
4  
4  
4  
4  
4  
4  
4  
4  
4  
5  
5  
5  
5  
5  
5  
5  
5  
5  
6  
6  
6  
14  
8  
7  
9  
9  
9  
14  
14  
11  
28  
12  
6  
6  
6  
3







8  
8  
8  
13  
5  
5  
5  
5  
10  
22  
6  
6  
6  
6  
6  
16  
10  
10  
4  
4  
4  
4  
4  
4  
4  
4  
4  
4  
9  
9  
9  
9  
24  
5  
5  
5  
7  
7  
10  
10  
8  
8  
11  
6  
6  
9  
3  
3  
3  
3  
3  
3  
3





5  
5  
5  
21  
17  
19  
4  
4  
4  
4  
4  
4  
4  
4  
4  
6  
7  
20  
10  
3  
3  
3  
3  
3  
3  
3  
3  
3  
3  
3  
3  
3  
3  
3  
3  
3  
3  
3  
3  
15  
8  
8  
8  
9  
12  
6  
6  
6  
6  
10  
10  
131  
53  
66  
34  
52  
52

52  
33  
49  
48  
46  
47  
29  
31  
29  
44  
53  
12  
27  
11  
19  
11  
18  
44  
26  
15  
12  
18  
14  
8  
42  
34  
14  
42  
6  
9  
9  
9  
7  
6  
23  
22  
31  
9  
12  
16  
22  
5  
15  
14  
13  
11  
21  
16  
5  
19

10  
8  
29  
21  
13  
6  
6  
13  
10  
12  
14  
7  
34  
5  
6  
17  
13  
13  
4  
31  
28  
31  
17  
8  
11  
15  
10  
4  
11  
3  
15  
22  
177  
177  
110  
103  
68  
69  
55  
55  
47  
48  
28  
34  
32  
26  
21  
58  
35  
36

36  
20  
31  
15  
17  
15  
15  
20  
20  
14  
30  
16  
46  
20  
22  
19  
42  
47  
26  
14  
9  
39  
15  
14  
11  
10  
10  
9  
11  
10  
13  
11  
7  
17  
17  
29  
10  
7  
10  
14  
9  
15  
15  
10  
6  
7  
28  
14  
14  
6



6  
6  
6  
7  
7  
6  
23  
19  
8  
22  
6  
6  
16  
8  
14  
5  
21  
8  
6  
6  
6  
9  
5  
7  
7  
12  
7  
10  
6  
5  
7  
6  
6  
5  
12  
18  
10  
6  
5  
6  
26  
5  
5  
8  
6  
6  
11  
8  
9  
23

5  
5  
5  
8  
7  
4  
5  
7  
7  
20  
10  
4  
4  
4  
6  
5  
6  
4  
4  
24  
11  
4  
4  
5  
8  
6  
12  
34  
15  
23  
7  
10  
4  
4  
6  
28  
18  
10  
10  
5  
4  
19  
7  
6  
8  
4  
6  
4  
4  
10

13  
3  
3  
11  
5  
19  
25  
8  
3  
4
