# Supplementary material for: Building an Immune-Related Genes Model to Predict Treatment, Extracellular Matrix, and Prognosis of Head and Neck Squamous Cell Carcinoma
Source: Hindawi journal article supplement (doi:10.1155/2023/6680731), 2023-07-11
Supplement: f6 [file 6680731.f6.pdf]

Univariate Cox regression analysis

| id     | HR          | HR.95L      | HR.95H      | pvalue      |
|--------|-------------|-------------|-------------|-------------|
| Age    | 1.379535674 | 1.022716648 | 1.860846481 | 0.03511178  |
| Gender | 0.778807585 | 0.568422954 | 1.06705975  | 0.119713964 |
| Grade  | 1.160543194 | 0.922834925 | 1.459481505 | 0.20293652  |
| Stage  | 1.451799835 | 1.205963064 | 1.747750677 | 8.20E-05    |
| IRGPI  | 1.850991524 | 1.581609661 | 2.166254864 | 1.68E-14    |

multivariate Cox regression analysis

| id    | HR          | HR.95L      | HR.95H      | pvalue      |
|-------|-------------|-------------|-------------|-------------|
| Age   | 1.602395877 | 1.183779025 | 2.169047171 | 0.002272877 |
| Stage | 1.514006913 | 1.25774609  | 1.822479873 | 1.17E-05    |
| IRGPI | 2.014214902 | 1.691145497 | 2.399002143 | 4.15E-15    |
