# Supplementary material for: Building an Immune-Related Genes Model to Predict Treatment, Extracellular Matrix, and Prognosis of Head and Neck Squamous Cell Carcinoma
Source: Hindawi journal article supplement (doi:10.1155/2023/6680731), 2023-07-11
Supplement: f7 [file 6680731.f7.pdf]

| ID        | Descriptor | setSize | enrichment | NES      | pvalue   | p.adjust | qvalues  | rank |
|-----------|------------|---------|------------|----------|----------|----------|----------|------|
| KEGG_HYP  | KEGG_HYP   | 62      | 0.699758   | 2.497823 | 1.95E-09 | 3.52E-07 | 3.08E-07 | 914  |
| KEGG_FOC  | KEGG_FOC   | 170     | 0.484932   | 2.109414 | 1.50E-07 | 1.35E-05 | 1.18E-05 | 2002 |
| KEGG_DILA | KEGG_DILA  | 65      | 0.623262   | 2.277318 | 1.52E-06 | 9.13E-05 | 8.01E-05 | 914  |
| KEGG_ARR  | KEGG_ARR   | 53      | 0.636119   | 2.206406 | 7.35E-06 | 0.000331 | 0.00029  | 914  |
| KEGG_CAR  | KEGG_CAR   | 57      | 0.603212   | 2.099505 | 1.43E-05 | 0.000515 | 0.000452 | 1367 |
| KEGG_ECM  | KEGG_ECM   | 64      | 0.556933   | 2.032462 | 4.56E-05 | 0.001369 | 0.001201 | 1615 |
| KEGG_CELI | KEGG_CELI  | 107     | -0.60069   | -1.69033 | 0.000314 | 0.007349 | 0.006446 | 2088 |
| KEGG_INTE | KEGG_INTE  | 32      | -0.74052   | -1.80642 | 0.000327 | 0.007349 | 0.006446 | 2703 |
| KEGG_PRIM | KEGG_PRIM  | 29      | -0.75457   | -1.81098 | 0.000578 | 0.01156  | 0.010141 | 1769 |
| KEGG_GLY  | KEGG_GLY   | 19      | 0.717995   | 2.082828 | 0.000823 | 0.014815 | 0.012996 | 2447 |
| KEGG_PRO  | KEGG_PRO   | 42      | 0.527496   | 1.756057 | 0.003066 | 0.047627 | 0.041778 | 5417 |
| KEGG_AUT  | KEGG_AUT   | 26      | -0.72837   | -1.72415 | 0.003175 | 0.047627 | 0.041778 | 2484 |
| KEGG_CHE  | KEGG_CHE   | 160     | -0.51688   | -1.48452 | 0.003764 | 0.0507   | 0.044474 | 2191 |
| KEGG_ALL  | KEGG_ALL   | 27      | -0.70939   | -1.68708 | 0.003943 | 0.0507   | 0.044474 | 2484 |
| KEGG_TYPI | KEGG_TYPI  | 32      | -0.66729   | -1.62777 | 0.004284 | 0.051405 | 0.045092 | 2484 |
| KEGG_TAS  | KEGG_TAS   | 13      | -0.77972   | -1.638   | 0.004818 | 0.054205 | 0.047548 | 2125 |
| KEGG_DRU  | KEGG_DRU   | 37      | -0.65754   | -1.64298 | 0.006592 | 0.069794 | 0.061223 | 1352 |
| KEGG_ARA  | KEGG_ARA   | 41      | -0.64079   | -1.61967 | 0.00807  | 0.080698 | 0.070788 | 2722 |
| KEGG_LINC | KEGG_LINC  | 15      | -0.76429   | -1.6351  | 0.009317 | 0.088269 | 0.077429 | 3106 |
| KEGG_ASTI | KEGG_ASTI  | 17      | -0.74737   | -1.64134 | 0.010431 | 0.093422 | 0.081949 | 2484 |
| KEGG_RETI | KEGG_RETI  | 27      | -0.66989   | -1.59314 | 0.010899 | 0.093422 | 0.081949 | 1545 |
| KEGG_ALPI | KEGG_ALPI  | 12      | -0.73847   | -1.51297 | 0.016113 | 0.127176 | 0.111558 | 3106 |
| KEGG_REG  | KEGG_REG   | 172     | 0.313253   | 1.372703 | 0.01625  | 0.127176 | 0.111558 | 1681 |
| KEGG_T_CI | KEGG_T_CI  | 96      | -0.51727   | -1.44252 | 0.019156 | 0.143667 | 0.126023 | 2703 |
| KEGG_CYT  | KEGG_CYT   | 183     | -0.45972   | -1.32667 | 0.020301 | 0.146164 | 0.128214 | 2279 |
| KEGG_B_C  | KEGG_B_C   | 72      | -0.53592   | -1.45264 | 0.030735 | 0.212784 | 0.186653 | 3983 |
| KEGG_SMA  | KEGG_SMA   | 78      | 0.376804   | 1.376237 | 0.034135 | 0.227566 | 0.199619 | 1596 |
| KEGG_O_G  | KEGG_O_G   | 23      | -0.63632   | -1.47697 | 0.047014 | 0.292135 | 0.256259 | 1484 |
| KEGG_GLY  | KEGG_GLY   | 20      | -0.6468    | -1.46702 | 0.048408 | 0.292135 | 0.256259 | 1090 |
| KEGG_GRA  | KEGG_GRA   | 29      | -0.60724   | -1.45739 | 0.048689 | 0.292135 | 0.256259 | 2484 |

leading\_core\_enrichment

tags=45%, TTN/ACTC1/DES/CACNA1S/ITGA5/CACNG1/MYL2/ITGA3/CACNG6/ITGB6/ITGA6/CACNG4/  
tags=35%, LAMA3/ACTN2/LAMC2/FN1/VEGFC/CAV1/ITGA5/MYLPF/THBS1/FLNC/MYL2/ITGA3/PDGF/  
tags=40%, TTN/ACTC1/DES/CACNA1S/ITGA5/CACNG1/MYL2/ITGA3/CACNG6/ITGB6/ITGA6/CACNG4/  
tags=38%, DES/ACTN2/CACNA1S/CDH2/ITGA5/CACNG1/ITGA3/CACNG6/ITGB6/ITGA6/CACNG4/SGCA  
tags=32%, ACTC1/CACNA1S/CACNG1/MYL2/ATP1A2/CACNG6/COX6A2/CACNG4/TPM1/TNNC1/TPM2  
tags=45%, LAMA3/LAMC2/FN1/ITGA5/THBS1/ITGA3/ITGB6/ITGA6/LAMB3/IBSP/COL4A6/ITGB1/TNC/  
tags=48%, CD34/HLA-DRB1/CLDN20/HLA-DQB1/CLDN23/HLA-G/PECAM1/MPZ/HLA-DRB5/HLA-DMA/  
tags=72%, MAP3K14/HLA-DRB1/HLA-DQB1/HLA-DRB5/TNFSF13/HLA-DMA/HLA-DPB1/HLA-DRA/HLA-  
tags=59%, CD4/ICOS/BTK/CD8B/CD8A/BLNK/CIITA/CD3E/CD3D/PTPRC/LCK/JAK3/ZAP70/IL2RG/TNFR  
tags=63%, CHPF/CHST11/DSE/CSGALNACT2/CHPF2/XYLT2/CHST3/B3GAT3/CHST15/CHSY1/CHSY3/B4  
tags=83%, PSMD2/POMP/PSMC1/PSMA7/PSMA1/PSMD7/PSMB9/PSMB7/PSMC6/PSMD13/PSMD4/F  
tags=69%, HLA-DRB1/HLA-DQB1/HLA-G/GZMB/HLA-DRB5/HLA-DMA/HLA-DPB1/PRF1/HLA-DRA/HLA-  
tags=29%, CX3CL1/PPBP/ADCY4/GNG2/GNGT2/CCL21/FGR/PRKX/CCL17/PIK3R5/CCR8/PREX1/CXCL1/  
tags=67%, HLA-DRB1/HLA-DQB1/HLA-G/GZMB/HLA-DRB5/HLA-DMA/HLA-DPB1/PRF1/HLA-DRA/HLA-  
tags=66%, HLA-DRB1/HLA-DQB1/HLA-G/GZMB/HLA-DRB5/HLA-DMA/HLA-DPB1/PRF1/HLA-DRA/HLA-  
tags=62%, ADCY4/PRKX/ADCY6/PLCB2/SCNN1G/TAS1R3/SCNN1B/SCNN1A  
tags=35%, ALDH3A1/UGT1A8/AOX1/GSTM1/ADH7/CYP3A5/GSTA1/CYP2E1/MAOB/CYP2C18/FMO2/I  
tags=59%, CBR1/TBXAS1/PLA2G6/PLA2G2F/CYP2J2/ALOX15B/JMJD7-PLA2G4B/GGT1/ALOX15/ALOX5  
tags=80%, PLA2G6/PLA2G2F/CYP2J2/JMJD7-PLA2G4B/ALOX15/AKR1B10/PLA2G4E/CYP3A5/PLA2G3/I  
tags=76%, HLA-DRB1/HLA-DQB1/HLA-DRB5/HLA-DMA/HLA-DPB1/HLA-DRA/HLA-DPA1/HLA-DMB/HLA-  
tags=37%, RDH10/CYP26A1/UGT1A8/ADH7/ALDH1A1/DHRS9/RDH12/CYP3A5/CYP2C18/ADH1C  
tags=75%, PLA2G6/ACOX1/PLA2G2F/JMJD7-PLA2G4B/ACOX3/FADS2/PLA2G4E/PLA2G3/PLA2G2D  
tags=24%, ACTN2/FN1/ITGA5/FGF19/MYLPF/MYL2/ITGA3/PDGF/ITGB6/MYLK2/ITGA6/PXN/ACTN1/  
tags=31%, MAP3K14/LCP2/NFATC2/IKBKB/NCK1/FOS/MAPK13/CD4/PIK3R5/VAV1/ICOS/IFNG/CTLA4,  
tags=32%, IL7/TNFRSF9/CX3CL1/PPBP/ACVR2A/TNFRSF14/CCL21/KDR/TNFSF13/TNFRSF1B/CCL17/CC  
tags=40%, NFATC4/KRAS/VAV3/CHP1/PTPN6/PIK3CB/PIK3AP1/CD72/RAF1/RASGRP3/PLCG2/LYN/NF  
tags=23%, LAMA3/LAMC2/FN1/PTGS2/ITGA3/BIRC2/ITGA6/LAMB3/CCND1/COL4A6/CDK6/ITGB1/LAI  
tags=30%, GCNT3/GALNT12/GCNT4/GALNT5/GALNT17/ST6GALNAC1/B3GNT6  
tags=25%, ABO/FUT2/FUT7/FUT3/FUT6  
tags=62%, HLA-DRB1/HLA-DQB1/HLA-G/GZMB/HLA-DRB5/HLA-DMA/HLA-DPB1/PRF1/HLA-DRA/HLA-

SGCA/TPM1/SGCG/TNNC1/TPM2/SGCD/CACNB1/MYH7/IL6/ITGB1/MYL3/PRKAB2/PRKAA2/ITGB4/TNIA/CAV3/BIRC2/ITGB6/MYLK2/ITGA6/LAMB3/CCND1/IBSP/PXN/COL4A6/CAV2/ACTN1/PDGFC/EGFR/V/SGCA/TPM1/SGCG/TNNC1/TPM2/SGCD/CACNB1/MYH7/ITGB1/PLN/MYL3/ITGB4/TNNI3/ITGA7

√/SGCG/SGCD/CACNB1/ACTN1/ITGB1/DSG2/ITGB4/ITGA7

¿/COX7B2/CACNB1/MYH7/MYL3/TNNI3/TNNT2/SLC9A1

'COL5A1/COL5A3/SDC4/ITGB4/AGRN/HMMR/ITGA7/COL5A2/SDC3/LAMC1/COL4A2/COL4A1/CD44/LA/ITGB2/HLA-DPB1/HLA-DRA/HLA-DPA1/CD4/HLA-DMB/ITGA9/JAM2/SELPLG/ICOS/HLA-DQA1/HLA-DOPA1/HLA-DMB/CXCL12/ICOS/HLA-DQA1/HLA-DOB/CCL28/HLA-DOA/HLA-DQA2/ITGB7/CXCR4/CD28, SF13C/CD19/CD79A

GALT7

²SMA6/PSMF1/PSMC3/PSMD14/PSMB5/PSMB3/PSMB1/PSMD11/PSMB2/SEM1/PSMC2/PSMA2/PSMI/DPA1/HLA-DMB/HLA-DQA1/HLA-DOB/CTLA4/HLA-DOA/HLA-DQA2/FASLG/CD28

2/VAV1/CCL2/CCL22/ADCY6/PLCB2/ARRB1/CCL18/TIAM1/CCL28/WAS/XCL2/CCL24/CCR5/RASGRP2/DPA1/HLA-DMB/IFNG/HLA-DQA1/HLA-DOB/HLA-DOA/HLA-DQA2/FASLG/CD28

·DPA1/HLA-DMB/IFNG/HLA-DQA1/HLA-DOB/CPE/HLA-DOA/HLA-DQA2/FASLG/PTPRN2/CD28/ICA1

FMO3/ADH1C

¡/CYP4F3/CBR3/PTGIS/HPGDS/PLA2G4E/EPHX2/ALOX12/GGT6/ALOX12B/PLA2G3/CYP2E1/PTGDS/CYP2E1/CYP2C18/PLA2G2D

A-DQA1/HLA-DOB/FCER1A/HLA-DOA/HLA-DQA2

PDGFC/EGFR/RRAS2/VAV2/ITGB1/GNA12/PDGFB/PFN2/CFL2/ARPC1B/DIAPH3/ITGB4/FGFR4/ITGA7/∕MAP3K8/PDCD1/CD8B/CD8A/TEC/CD3E/CD3D/PTPRC/LCK/PIK3CG/PIK3R3/ITK/CD28/CD247/CD3G/Z:R8/CXCL12/IL3RA/CCL2/CCL22/IFNG/EDAR/CNTFR/CSF2RA/IL23A/CCL18/CCL28/TNFSF15/XCL2/IL10R ATC2/IKBKB/SYK/FOS/PIK3R5/VAV1/FCGR2B/BTK/INPP5D/BLNK/PIK3CG/PIK3R3/PRKCB/CD79B/CD22/MC1/PIK3CD/COL4A2/COL4A1/LAMB1/ITGAV

·DPA1/HLA-DMB/IFNG/HLA-DQA1/HLA-DOB/HLA-DOA/HLA-DQA2/FASLG/CD28

NI3/ITGA7

\V2/ITGB1/TNC/PDGFB/COL5A1/MET/PARVB/PRKCA/FLNA/COL5A3/ITGB4/PGF/ITGA7/COL5A2/BCAR

\MB1/ITGAV/SDC2

B/CTLA4/CLDN7/PDCD1/ICAM2/CD8B/CD8A/HLA-DOA/CLDN4/CADM1/NRCAM/HLA-DQA2/CD2/OCLN  
/TNFRSF13C/TNFRSF17/PIGR

E4/PSMA3/PSMD3/PSMA4/PSME3/PSMB6/PSMA5/PSMD1/PSMB4/PSMD8/PSMD12/PSMB8

OCK2/CXCR6/CXCR4/JAK3/PIK3CG/PIK3R3/ITK/CXCL13/PRKCB/CX3CR1/NCF1/CCR7/GNG7/CCR2/CXCF

2C18/PLA2G2D

\SN/RRAS/BCAR1/BDKRB1/PIK3CD/CFL1/MYL9/MYH10/SLC9A1/ACTB/ITGAV/MRAS/PFN1/VCL  
AP70/RASGRP1

A/CCL24/CCR5/TNFSF18/IL2RB/FASLG/LTB/IL20RA/TNFRSF11A/CXCR6/CXCR4/TNFSF4/TNFRSF4/CXCL  
'CD19/CD79A

1/IGF1R/LAMC1/PIK3CD/SHC1/PARVA/MYL9/COL4A2/COL4A1/LAMB1/ACTB/ITGAV/VEGFA/VCL/RAP1

4/ITGB7/PTPRC/SPN/CD28/ITGAL/SELL/CD6/ICAM3/CLDN17/SELP/CLDN3/SELE/CLDN6/VCAM1/CD22/

3/CXCR2/CCR4/CCL19/ADCY5/GNG8

13/TNFRSF11B/IL21R/CX3CR1/CCR7/CCR2/IL2RG/CXCR3/CXCR2/TNFRSF19/CCR4/CSF2RB/CCL19/KIT/

.B/COL6A2/PIK3CA/ILK/PPP1CA

CLDN10

AMH/TNFRSF13C/CD27/IL17RB/TNFRSF17/IL19
