# Supplementary material for: Building an Immune-Related Genes Model to Predict Treatment, Extracellular Matrix, and Prognosis of Head and Neck Squamous Cell Carcinoma
Source: Hindawi journal article supplement (doi:10.1155/2023/6680731), 2023-07-11
Supplement: f8 [file 6680731.f8.pdf]

| immune         | cor      | pvalue   |
|----------------|----------|----------|
| B cell naive   | -0.13712 | 0.002141 |
| B cell mem     | -0.09846 | 0.027853 |
| B cell plasn   | -0.13205 | 0.003123 |
| T cell CD8+    | -0.26457 | 1.94E-09 |
| T cell CD4+    | 0.158416 | 0.000382 |
| T cell follici | -0.29986 | 7.94E-12 |
| T cell regul   | -0.16911 | 0.000147 |
| NK cell rest   | 0.110945 | 0.013147 |
| Monocyte       | -0.09464 | 0.034554 |
| Macrophagξ     | 0.284235 | 9.98E-11 |
| Macrophagξ     | -0.09458 | 0.034662 |
| Myeloid de     | -0.09569 | 0.032594 |
| Mast cell a    | -0.25002 | 1.50E-08 |
| Mast cell rξ   | 0.203294 | 4.70E-06 |
| Eosinophil     | 0.124214 | 0.00546  |
