# Supplementary material for: Building an Immune-Related Genes Model to Predict Treatment, Extracellular Matrix, and Prognosis of Head and Neck Squamous Cell Carcinoma
Source: Hindawi journal article supplement (doi:10.1155/2023/6680731), 2023-07-11

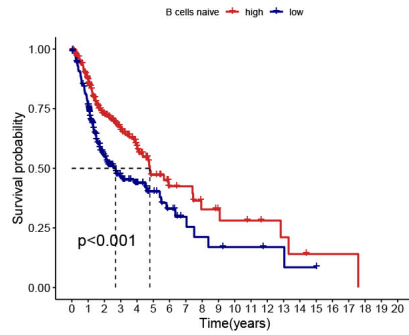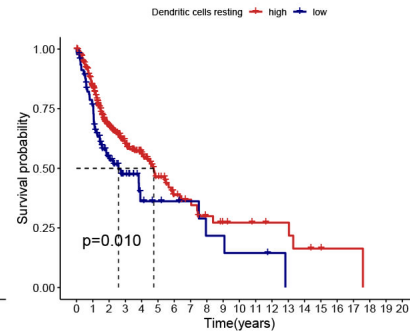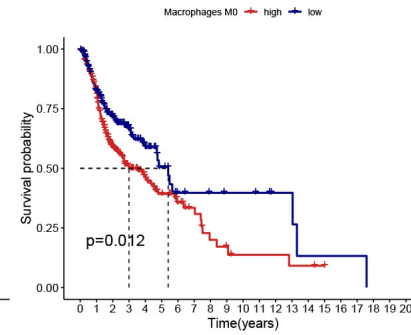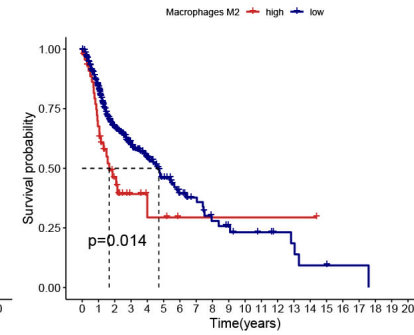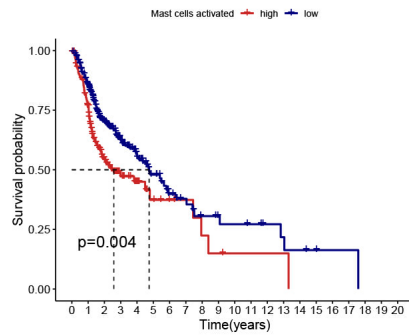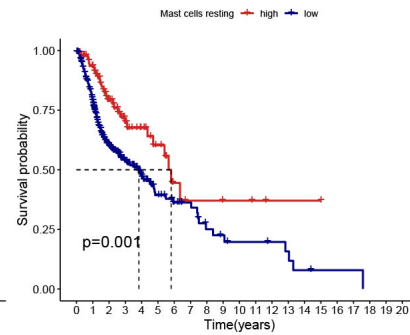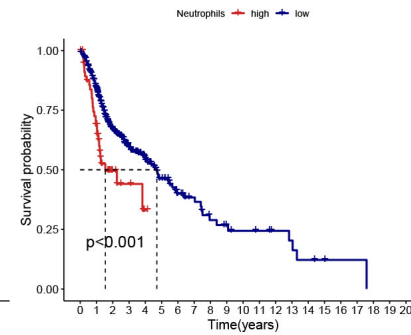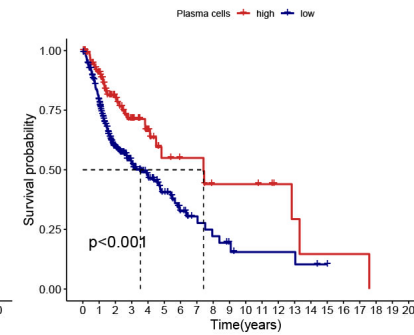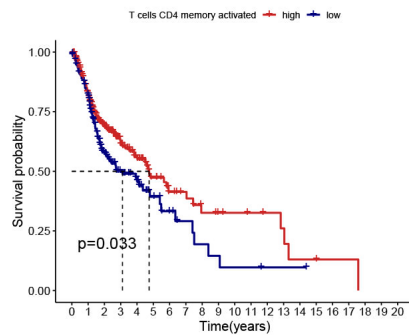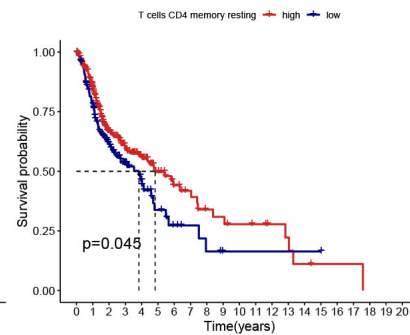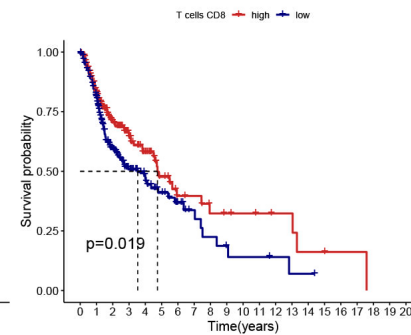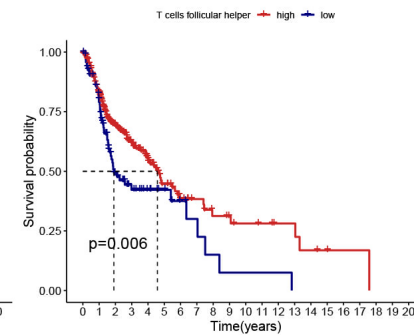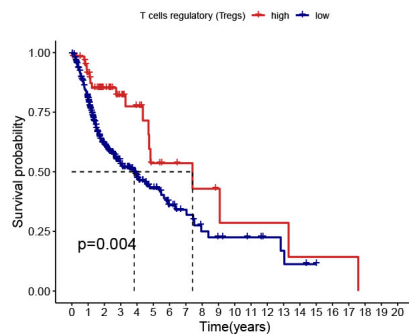

Supplement: f9 [file 6680731.f9.pdf]
